# Supplementary material for: Genetic regulation of DNA methylation across tissues reveals thousands of molecular links to complex traits
Source: Research Square preprint supplement (doi:10.21203/rs.3.rs-492596/v1), 2021-05-11
Supplement: Supplementary file 1 [file 8099bbd2572378a632aa88d2.xlsx]

## Sheet: README
Supplementary Table 5 - GWASs metadata, QTL-GWAS colocalization results and utilized priors
Sheet: GWAS trait metadata
Column	Description
A	Trait Id
B	Abbreviation Id
C	Consortium of origin
D	Description
E	Trait category
F	Number of GWAS hits per trait, corresponding to number of genomic LD blocks with one ore more GWAS significant (P < 5e-08) non-imputed variants.
G	If 'Y', GWAS trait exhibited overlap with one or more e/mQTLs for at least one GWAS hit counted in (F), and was tested for e/mQTL-GWAS colocalization.
Sheet: Genomic LD blocks
Column	Description
A	Linkage Disiquilibrium block Id (see 'Determination of GWAS significant loci' in Methods). Coordinates (B-D) correspond to hg38 build.
B	chr
C	start (bp)
D	end (bp)
Sheet: *QTL-GWAS colocalization results
Results corresponding to significant (RCP > 0.3 and PP4 > 0.3) mQTL-GWAS and eQTL-GWAS colocalizations
Column	Description
A	Trait Id
B	Genomic LD block
C	QTL Tissue
D	mCpG or eGene
E	coloc PP4
F	fastenloc RCP
G	fastenloc top colocalizing variant: (chromosome)_(position)_(reference allele)_(alternative allele)_b38. hg38 build.
Sheet: mQTL-GWAS coloc priors
Column	Description
A	Tissue
B	Trait
C	Prior type corresponding to probabilities of a variant yielding a) a mQTL association (pi1), b) a GWAS association (pi2) and b) a mQTL and a GWAS association (pi12)
D	Prior value
Sheet: eQTL-GWAS coloc priors
Column	Description
A	Tissue
B	Trait
C	Prior type corresponding to probabilities of a variant yielding a) a eQTL association (pi1), b) a GWAS association (pi2) and b) a eQTL and a GWAS association (pi12)
D	Prior value

## Sheet: GWAS metadata
GWAS trait	Tag	Consortium	Description	Category	# GWAS hit loci	Tested for QTL-GWAS colocalization
UKB_50_Standing_height	Height 1	UK Biobank	Standing height	Anthropometric	733	Y
GIANT_HEIGHT	Height 2	GIANT	Height	Anthropometric	468	Y
UKB_21001_Body_mass_index_BMI	BMI	UK Biobank	Body mass index (BMI)	Anthropometric	399	Y
UKB_23099_Body_fat_percentage	Body Fat %	UK Biobank	Body fat percentage	Anthropometric	331	Y
Astle_et_al_2016_Platelet_count	Platelet c.	Astle_et_al_2016	Platelet count	Blood cell counts	248	Y
Astle_et_al_2016_Monocyte_count	Monocyte c.	Astle_et_al_2016	Monocyte count	Blood cell counts	208	Y
Astle_et_al_2016_White_blood_cell_count	White Blood c	Astle_et_al_2016	White blood cell count	Blood cell counts	197	Y
Astle_et_al_2016_Red_blood_cell_count	RBC	Astle_et_al_2016	Red blood cell count	Blood cell counts	194	Y
UKB_20002_1065_self_reported_hypertension	Hypertension	UK Biobank	Non-cancer illness code, self-reported: hypertension	Cardiometabolic	192	Y
Astle_et_al_2016_Eosinophil_counts	Eosinophil c.	Astle_et_al_2016	Eosinophil counts	Blood cell counts	184	Y
Astle_et_al_2016_High_light_scatter_reticulocyte_count	Reticulocyte HLS c.	Astle_et_al_2016	High light scatter reticulocyte count	Blood cell counts	184	Y
Astle_et_al_2016_Lymphocyte_counts	Lymphocyte c.	Astle_et_al_2016	Lymphocyte counts	Blood cell counts	184	Y
Astle_et_al_2016_Sum_eosinophil_basophil_counts	Sum Eosinophil Basophil c.	Astle_et_al_2016	Sum eosinophil basophil counts	Blood cell counts	184	Y
Astle_et_al_2016_Sum_basophil_neutrophil_counts	Sum Basophil Neutrophil c.	Astle_et_al_2016	Sum basophil neutrophil counts	Blood cell counts	170	Y
Astle_et_al_2016_Granulocyte_count	Granulocyte c.	Astle_et_al_2016	Granulocyte count	Blood cell counts	169	Y
Astle_et_al_2016_Myeloid_white_cell_count	Myeloid c.	Astle_et_al_2016	Myeloid white cell count	Blood cell counts	169	Y
Astle_et_al_2016_Sum_neutrophil_eosinophil_counts	Sum Neutrophil Eosinophil c.	Astle_et_al_2016	Sum neutrophil eosinophil counts	Blood cell counts	169	Y
Astle_et_al_2016_Neutrophil_count	Neutrophil c.	Astle_et_al_2016	Neutrophil count	Blood cell counts	168	Y
Astle_et_al_2016_Reticulocyte_count	Reticulocyte c.	Astle_et_al_2016	Reticulocyte count	Blood cell counts	168	Y
UKB_2395_4_Hair_or_balding_pattern_Pattern_4	Balding Pattern4 Type	UK Biobank	Hair/balding pattern: Pattern 4	Other	150	Y
UKB_6152_9_diagnosed_by_doctor_Hayfever_allergic_rhinitis_or_eczema	Hayfever	UK Biobank	Blood clot, DVT, bronchitis, emphysema, asthma, rhinitis, eczema, allergy diagnosed by doctor: Hayfever, allergic rhinitis or eczema	Immune and allergy	124	Y
pgc.scz2	Schizophrenia	PGC	Schizophrenia	Psychiatric and neurologic	101	Y
UKB_1180_Morning_or_evening_person_chronotype	Chronotype	UK Biobank	Morning/evening person (chronotype)	Psychiatric and neurologic	97	Y
UKB_20002_1226_self_reported_hypothyroidism_or_myxoedema	Hyperthyroidism Myxoedema	UK Biobank	Non-cancer illness code, self-reported: hypothyroidism/myxoedema	Other	97	Y
UKB_20022_Birth_weight	Birth Weight 1	UK Biobank	Birth weight	Anthropometric	89	Y
UKB_20127_Neuroticism_score	Neuroticism	UK Biobank	Neuroticism score	Psychiatric and neurologic	77	Y
UKB_20002_1111_self_reported_asthma	Asthma 1	UK Biobank	Non-cancer illness code, self-reported: asthma	Immune and allergy	76	Y
UKB_6152_8_diagnosed_by_doctor_Asthma	Asthma 2	UK Biobank	Blood clot, DVT, bronchitis, emphysema, asthma, rhinitis, eczema, allergy diagnosed by doctor: Asthma	Immune and allergy	76	Y
SSGAC_Education_Years_Pooled	Education Years	SSGAC	Education years (Discovery and replication cohorts, genders pooled)	Psychiatric and neurologic	74	Y
IBD.EUR.Inflammatory_Bowel_Disease	Inflammatory Bowel	IBD	Inflammatory Bowel Disease	Immune and allergy	67	Y
RA_OKADA_TRANS_ETHNIC	RheumatoidArthritis 1	RA_OKADA	Rheumatoid Arthritis	Immune and allergy	57	Y
UKB_1160_Sleep_duration	Sleep Duration	UK Biobank	Sleep duration	Psychiatric and neurologic	56	Y
UKB_20016_Fluid_intelligence_score	Intelligence	UK Biobank	Fluid intelligence score	Psychiatric and neurologic	56	Y
IBD.EUR.Crohns_Disease	Crohn	IBD	Crohn's Disease	Immune and allergy	53	Y
UKB_20002_1473_self_reported_high_cholesterol	High Cholesterol	UK Biobank	Non-cancer illness code, self-reported: high cholesterol	Cardiometabolic	51	Y
EGG_BW3_EUR	Birth Weight 2	EGG	Birth Weight	Anthropometric	50	Y
BCAC_Overall_BreastCancer_EUR	Breast Cancer	BCAC	Overall breast cancer in Europeans, imputed genotype	Cancer	48	Y
IMMUNOBASE_Systemic_lupus_erythematosus_hg19	Lupus	IMMUNOBASE	Systemic Lupus Erythematosus	Immune and allergy	48	Y
CARDIoGRAM_C4D_CAD_ADDITIVE	Coronary Artery	CARDIoGRAM_C4D	Coronary Artery Disease (additive model)	Cardiometabolic	45	Y
UKB_2395_2_Hair_or_balding_pattern_Pattern_2	Balding Pattern2 Type	UK Biobank	Hair/balding pattern: Pattern 2	Other	43	Y
UKB_2395_3_Hair_or_balding_pattern_Pattern_3	Balding Pattern3 Type	UK Biobank	Hair/balding pattern: Pattern 3	Other	43	Y
BCAC_ER_negative_BreastCancer_EUR	Breast Cancer ER+	BCAC	Estrogen-receptor-negative breast cancer in Europeans, imputed genotype	Cancer	42	Y
IBD.EUR.Ulcerative_Colitis	UlcerativeColitis 1	IBD	Ulcerative Colitis	Immune and allergy	39	Y
UKB_1200_Sleeplessness_or_insomnia	Insomnia	UK Biobank	Sleeplessness / insomnia	Psychiatric and neurologic	29	Y
MAGNETIC_LDL.C	Cholesterol LDL	MAGNETIC	Total cholesterol in LDL	Cardiometabolic	20	Y
UKB_20002_1453_self_reported_psoriasis	Psoriasis	UK Biobank	Non-cancer illness code, self-reported: psoriasis	Immune and allergy	20	Y
UKB_20002_1466_self_reported_gout	Gout	UK Biobank	Non-cancer illness code, self-reported: gout	Other	17	Y
MAGNETIC_IDL.TG	Triglycerides LDL	MAGNETIC	Triglycerides in IDL	Cardiometabolic	16	Y
IGAP_Alzheimer	Alzheimer	IGAP	Alzheimer	Psychiatric and neurologic	13	Y
UKB_20002_1265_self_reported_migraine	Migraine	UK Biobank	Non-cancer illness code, self-reported: migraine	Psychiatric and neurologic	13	Y
EAGLE_Eczema	Eczema 1	EAGLE	Eczema	Immune and allergy	12	Y
UKB_20002_1452_self_reported_eczema_or_dermatitis	Eczema 2	UK Biobank	Non-cancer illness code, self-reported: eczema/dermatitis	Immune and allergy	12	Y
MAGIC_FastingGlucose	Fasting Glucose	MAGIC	Fasting Glucose	Cardiometabolic	11	Y
MAGNETIC_HDL.C	Cholesterol HDL	MAGNETIC	Total cholesterol in HDL	Cardiometabolic	10	Y
UKB_20002_1094_self_reported_deep_venous_thrombosis_dvt	Trombosis	UK Biobank	Non-cancer illness code, self-reported: deep venous thrombosis (dvt)	Cardiometabolic	10	Y
UKB_20002_1464_self_reported_rheumatoid_arthritis	Rheumatoid Arthritis 2	UK Biobank	Non-cancer illness code, self-reported: rheumatoid arthritis	Immune and allergy	10	Y
UKB_6150_1_Vascular_or_heart_problems_diagnosed_by_doctor_Heart_attack	Heart Attack	UK Biobank	Vascular/heart problems diagnosed by doctor: Heart attack	Cardiometabolic	10	Y
UKB_6152_5_diagnosed_by_doctor_Blood_clot_in_the_leg_DVT	Blood Clot Leg	UK Biobank	Blood clot, DVT, bronchitis, emphysema, asthma, rhinitis, eczema, allergy diagnosed by doctor: Blood clot in the leg (DVT)	Cardiometabolic	10	Y
PGC_ADHD_EUR_2017	Hiperactivity	PGC	Attention deficit hyperactivity disorder - EUR	Psychiatric and neurologic	9	Y
UKB_20002_1313_self_reported_ankylosing_spondylitis	Ankylosing Spondylitis	UK Biobank	Non-cancer illness code, self-reported: ankylosing spondylitis	Immune	9	Y
UKB_20002_1309_self_reported_osteoporosis	Osteoporosis	UK Biobank	Non-cancer illness code, self-reported: osteoporosis	Other	8	Y
BCAC_ER_positive_BreastCancer_EUR	Breast Cancer ER-	BCAC	Estrogen-receptor-positive breast cancer in Europeans, imputed genotype	Cancer	7	Y
UKB_20002_1222_self_reported_type_1_diabetes	T1D	UK Biobank	Non-cancer illness code, self-reported: type 1 diabetes	Immune and allergy	7	Y
UKB_20002_1463_self_reported_ulcerative_colitis	Ulcerative Colitis 2	UK Biobank	Non-cancer illness code, self-reported: ulcerative colitis	Immune and allergy	7	Y
UKB_1807_Fathers_age_at_death	Father Age Death	UK Biobank	Father's age at death	Other	6	Y
MAGNETIC_CH2.DB.ratio	Methylene	MAGNETIC	Average number of methylene groups per a double bond	Cardiometabolic	3	Y
UKB_20002_1223_self_reported_type_2_diabetes	T2D	UK Biobank	Non-cancer illness code, self-reported: type 2 diabetes	Cardiometabolic	3	Y
Jones_et_al_2016_Chronotype	-	Jones_et_al_2016	Chronotype	Psychiatric and neurologic	12	N
UKB_20002_1225_self_reported_hyperthyroidism_or_thyrotoxicosis	-	UK Biobank	Non-cancer illness code, self-reported: hyperthyroidism/thyrotoxicosis	Other	12	N
UKB_20002_1461_self_reported_inflammatory_bowel_disease	-	UK Biobank	Non-cancer illness code, self-reported: inflammatory bowel disease	Immune and allergy	9	N
UKB_20002_1261_self_reported_multiple_sclerosis	-	UK Biobank	Non-cancer illness code, self-reported: multiple sclerosis	Psychiatric and neurologic	7	N
UKB_6152_7_diagnosed_by_doctor_Blood_clot_in_the_lung	-	UK Biobank	Blood clot, DVT, bronchitis, emphysema, asthma, rhinitis, eczema, allergy diagnosed by doctor: Blood clot in the lung	Cardiometabolic	7	N
UKB_20002_1616_self_reported_insomnia	-	UK Biobank	Non-cancer illness code, self-reported: insomnia	Psychiatric and neurologic	5	N
UKB_20002_1462_self_reported_crohns_disease	-	UK Biobank	Non-cancer illness code, self-reported: crohns disease	Immune and allergy	4	N
Jones_et_al_2016_SleepDuration	-	Jones_et_al_2016	Sleep Duration	Psychiatric and neurologic	3	N
SSGAC_Depressive_Symptoms	-	SSGAC	Depressive Symptoms	Psychiatric and neurologic	2	N
UKB_20002_1262_self_reported_parkinsons_disease	-	UK Biobank	Non-cancer illness code, self-reported: parkinsons disease	Psychiatric and neurologic	2	N
UKB_G43_Diagnoses_main_ICD10_G43_Migraine	-	UK Biobank	Diagnoses - main ICD10: G43 Migraine	Psychiatric and neurologic	2	N
CNCR_Insomnia_all	-	CNCR-CTG	Insomnia in both sexes	Psychiatric and neurologic	1	N
ENIGMA_Intracraneal_Volume	-	ENIGMA	Intracraneal Volume	Anthropometric	1	N
UKB_20002_1289_self_reported_schizophrenia	-	UK Biobank	Non-cancer illness code, self-reported: schizophrenia	Psychiatric and neurologic	1	N
UKB_3526_Mothers_age_at_death	-	UK Biobank	Mother's age at death	Other	1	N
UKB_G40_Diagnoses_main_ICD10_G40_Epilepsy	-	UK Biobank	Diagnoses - main ICD10: G40 Epilepsy	Psychiatric and neurologic	1	N
GEFOS_Forearm	-	GEFOS	Bone Mineral Density (Forearm)	Anthropometric	0	N
MAGIC_ln_FastingInsulin	-	MAGIC	Fasting Insulin	Cardiometabolic	0	N
UKB_20002_1154_self_reported_irritable_bowel_syndrome	-	UK Biobank	Non-cancer illness code, self-reported: irritable bowel syndrome	Other	0	N
UKB_20002_1243_self_reported_psychological_or_psychiatric_problem	-	UK Biobank	Non-cancer illness code, self-reported: psychological/psychiatric problem	Psychiatric and neurologic	0	N

## Sheet: Genomic LD blocks
chr	start	end
chr1	10583	1961168
chr1	1961168	3666172
chr1	3666172	4320751
chr1	4320751	5853833
chr1	5853833	7187275
chr1	7187275	9305140
chr1	9305140	10746927
chr1	10746927	11717784
chr1	11717784	12719464
chr1	12719464	14565015
chr1	14565015	16571235
chr1	16571235	18336405
chr1	18336405	20142656
chr1	20142656	21410095
chr1	21410095	22760390
chr1	22760390	23594100
chr1	23594100	25190354
chr1	25190354	27075376
chr1	27075376	29689034
chr1	29689034	31973084
chr1	31973084	34334157
chr1	34334157	37083582
chr1	37083582	38266175
chr1	38266175	39734895
chr1	39734895	41509656
chr1	41509656	43292786
chr1	43292786	44503511
chr1	44503511	46433829
chr1	46433829	47536904
chr1	47536904	48512516
chr1	48512516	49428505
chr1	49428505	51248054
chr1	51248054	53760589
chr1	53760589	55947444
chr1	55947444	56556055
chr1	56556055	58399727
chr1	58399727	59424737
chr1	59424737	61456693
chr1	61456693	62989418
chr1	62989418	64576021
chr1	64576021	66473721
chr1	66473721	68012212
chr1	68012212	69221933
chr1	69221933	70906787
chr1	70906787	71218722
chr1	71218722	73861224
chr1	73861224	76262450
chr1	76262450	79195513
chr1	79195513	80888506
chr1	80888506	83526065
chr1	83526065	84378812
chr1	84378812	85989068
chr1	85989068	87662948
chr1	87662948	89600744
chr1	89600744	91420760
chr1	91420760	93070902
chr1	93070902	94040635
chr1	94040635	95685337
chr1	95685337	97419693
chr1	97419693	99335048
chr1	99335048	100360849
chr1	100360849	101575460
chr1	101575460	102433189
chr1	102433189	103371589
chr1	103371589	105545220
chr1	105545220	107867043
chr1	107867043	109761309
chr1	109761309	111199115
chr1	111199115	112730684
chr1	112730684	114331223
chr1	114331223	115337972
chr1	115337972	118296444
chr1	118296444	148907004
chr1	148907005	151566404
chr1	151566405	153208353
chr1	153208353	154797927
chr1	154797927	156366342
chr1	156366342	158057622
chr1	158057622	159943258
chr1	159943258	162376931
chr1	162376931	165222465
chr1	165222465	166491280
chr1	166491280	169117086
chr1	169117086	170588635
chr1	170588635	173128768
chr1	173128768	175120632
chr1	175120632	177464245
chr1	177464245	178975174
chr1	178975174	178985335
chr1	178985335	181174985
chr1	181174985	182786221
chr1	182786221	184626379
chr1	184626379	186840891
chr1	186840891	188790814
chr1	188790814	189935000
chr1	189935000	191899800
chr1	191899800	194138312
chr1	194138312	196207071
chr1	196207071	197342384
chr1	197342384	199270756
chr1	199270756	200168521
chr1	200168521	201620847
chr1	201620847	203365606
chr1	203365606	204711940
chr1	204711940	206268085
chr1	206268085	208237019
chr1	208237019	210614406
chr1	210614406	212668988
chr1	212668988	214404923
chr1	214404923	216070292
chr1	216070292	218532171
chr1	218532171	219417229
chr1	219417229	221684889
chr1	221684889	222056878
chr1	222056878	224750818
chr1	224750818	226623159
chr1	226623159	229020501
chr1	229020501	230549509
chr1	230549509	231954506
chr1	231954506	233293538
chr1	233293538	234463688
chr1	234463688	235656136
chr1	235656136	237392328
chr1	237392328	238404507
chr1	238404507	239762014
chr1	239762014	240400791
chr1	240400791	241418920
chr1	241418920	241908300
chr1	241908300	243946197
chr1	243946197	245343444
chr1	245343444	247181216
chr1	247181216	248945267
chr2	10133	1777250
chr2	1777250	3926189
chr2	3926189	5568205
chr2	5568205	6696122
chr2	6696122	8282017
chr2	8282017	10158342
chr2	10158342	12279024
chr2	12279024	14195184
chr2	14195184	16148467
chr2	16148467	18466157
chr2	18466157	19492643
chr2	19492643	20850730
chr2	20850730	23118512
chr2	23118512	24464049
chr2	24464049	26672117
chr2	26672117	28375910
chr2	28375910	28994693
chr2	28994693	30240845
chr2	30240845	31327584
chr2	31327584	33138710
chr2	33138710	35119962
chr2	35119962	35896940
chr2	35896940	37905569
chr2	37905569	38804195
chr2	38804195	40054343
chr2	40054343	43082452
chr2	43082452	44086664
chr2	44086664	46255495
chr2	46255495	47091633
chr2	47091633	47985862
chr2	47985862	49795119
chr2	49795119	50591790
chr2	50591790	52263995
chr2	52263995	53281314
chr2	53281314	54458089
chr2	54458089	55976210
chr2	55976210	57201965
chr2	57201965	58070180
chr2	58070180	60064865
chr2	60064865	62201909
chr2	62201909	64398779
chr2	64398779	65706310
chr2	65706310	66999034
chr2	66999034	67783044
chr2	67783044	68912432
chr2	68912432	70528066
chr2	70528066	72947719
chr2	72947719	75402960
chr2	75402960	76686535
chr2	76686535	77852138
chr2	77852138	79823277
chr2	79823277	81393717
chr2	81393717	84913556
chr2	84913556	87738988
chr2	87738988	88855013
chr2	88855013	94660727
chr2	94660727	98378738
chr2	98378738	101205867
chr2	101205867	102072305
chr2	102072305	102971757
chr2	102971757	104508576
chr2	104508576	105593601
chr2	105593601	106791811
chr2	106791811	107812721
chr2	107812721	109814855
chr2	109814855	113164279
chr2	113164279	116014894
chr2	116014894	117609890
chr2	117609890	120546207
chr2	120546207	122545330
chr2	122545330	123974673
chr2	123974673	125083344
chr2	125083344	126616187
chr2	126616187	127276771
chr2	127276771	128716867
chr2	128716867	129309597
chr2	129309597	129900512
chr2	129900512	132285211
chr2	132285211	134401007
chr2	134401007	136285224
chr2	136285224	137940547
chr2	137940547	139342701
chr2	139342701	141047782
chr2	141047782	141761033
chr2	141761033	143761915
chr2	143761915	145688002
chr2	145688002	146519594
chr2	146519594	149353778
chr2	149353778	150874948
chr2	150874948	151630268
chr2	151630268	153148542
chr2	153148542	154534623
chr2	154534623	156704123
chr2	156704123	157676706
chr2	157676706	158720570
chr2	158720570	160913222
chr2	160913222	162647041
chr2	162647041	163610128
chr2	163610128	164322330
chr2	164322330	166303760
chr2	166303760	166499460
chr2	166499460	169111726
chr2	169111726	170369735
chr2	170369735	172274177
chr2	172274177	174724201
chr2	174724201	176498908
chr2	176498908	177688455
chr2	177688455	180448012
chr2	180448012	181401304
chr2	181401304	183492880
chr2	183492880	184415446
chr2	184415446	189017339
chr2	189017339	191108631
chr2	191108631	194996440
chr2	194996440	195582732
chr2	195582732	197213386
chr2	197213386	198446401
chr2	198446401	200711561
chr2	200711561	201953914
chr2	201953914	204934518
chr2	204934518	205870980
chr2	205870980	207780675
chr2	207780675	209076805
chr2	209076805	211514793
chr2	211514793	213149558
chr2	213149558	214709071
chr2	214709071	216850938
chr2	216850938	217530757
chr2	217530757	219589829
chr2	219589829	221656456
chr2	221656456	223994702
chr2	223994702	224975287
chr2	224975287	227255126
chr2	227255126	228506071
chr2	228506071	230978674
chr2	230978674	232685293
chr2	232685293	234242343
chr2	234242343	235134906
chr2	235134906	236540389
chr2	236540389	237852338
chr2	237852338	239030947
chr2	239030947	240620667
chr2	240620667	241210506
chr2	241210506	242147200
chr3	18479	1400095
chr3	1400095	2950436
chr3	2950436	4389963
chr3	4389963	6041496
chr3	6041496	7041700
chr3	7041700	8606875
chr3	8606875	9501499
chr3	9501499	10977979
chr3	10977979	13029299
chr3	13029299	14775393
chr3	14775393	16240935
chr3	16240935	17849626
chr3	17849626	19083652
chr3	19083652	20049856
chr3	20049856	21602215
chr3	21602215	22162752
chr3	22162752	23763374
chr3	23763374	25420067
chr3	25420067	26836278
chr3	26836278	27799419
chr3	27799419	29100769
chr3	29100769	30676463
chr3	30676463	32310223
chr3	32310223	33214100
chr3	33214100	35241966
chr3	35241966	36445350
chr3	36445350	38314625
chr3	38314625	40179807
chr3	40179807	41023037
chr3	41023037	42498510
chr3	42498510	45123661
chr3	45123661	46616010
chr3	46616010	47685722
chr3	47685722	49279539
chr3	49279539	51797999
chr3	51797999	54047363
chr3	54047363	55314832
chr3	55314832	56399879
chr3	56399879	58171792
chr3	58171792	60287177
chr3	60287177	62369991
chr3	62369991	63683610
chr3	63683610	65287863
chr3	65287863	66220021
chr3	66220021	68237764
chr3	68237764	69227611
chr3	69227611	70399877
chr3	70399877	72480178
chr3	72480178	74272666
chr3	74272666	75655798
chr3	75655798	77459684
chr3	77459684	78975391
chr3	78975391	81378159
chr3	81378159	82594735
chr3	82594735	84318328
chr3	84318328	85533081
chr3	85533081	87360582
chr3	87360582	88249223
chr3	88249223	94536472
chr3	94536472	95593127
chr3	95593127	98497106
chr3	98497106	99654918
chr3	99654918	100873373
chr3	100873373	103366116
chr3	103366116	104862769
chr3	104862769	107263964
chr3	107263964	109803548
chr3	109803548	110794923
chr3	110794923	113096852
chr3	113096852	114229016
chr3	114229016	115728233
chr3	115728233	117081306
chr3	117081306	118811404
chr3	118811404	120804208
chr3	120804208	122255250
chr3	122255250	123798921
chr3	123798921	125217798
chr3	125217798	126496100
chr3	126496100	128476018
chr3	128476018	130525891
chr3	130525891	132117672
chr3	132117672	133533329
chr3	133533329	135738064
chr3	135738064	137652241
chr3	137652241	140235755
chr3	140235755	141620255
chr3	141620255	143445786
chr3	143445786	144691974
chr3	144691974	145946832
chr3	145946832	147008842
chr3	147008842	149325450
chr3	149325450	150534217
chr3	150534217	151630942
chr3	151630942	153538782
chr3	153538782	154996429
chr3	154996429	156290911
chr3	156290911	157594239
chr3	157594239	159760101
chr3	159760101	161806716
chr3	161806716	163535417
chr3	163535417	165337681
chr3	165337681	167399641
chr3	167399641	168863172
chr3	168863172	171247120
chr3	171247120	172577941
chr3	172577941	173759495
chr3	173759495	175398750
chr3	175398750	176602499
chr3	176602499	178389377
chr3	178389377	179656798
chr3	179656798	181793378
chr3	181793378	184051895
chr3	184051895	185350467
chr3	185350467	187172556
chr3	187172556	189138425
chr3	189138425	190508818
chr3	190508818	192626025
chr3	192626025	194338942
chr3	194338942	195065945
chr3	195065945	196244537
chr3	196244537	197349116
chr3	197349116	198219751
chr4	10240	700926
chr4	700926	1476986
chr4	1476986	2841252
chr4	2841252	3844313
chr4	3844313	4682389
chr4	4682389	5500661
chr4	5500661	6771316
chr4	6771316	7537965
chr4	7537965	8150508
chr4	8150508	9324753
chr4	9324753	10697528
chr4	10697528	12321410
chr4	12321410	14270377
chr4	14270377	15145822
chr4	15145822	15925386
chr4	15925386	17381699
chr4	17381699	18840251
chr4	18840251	20542934
chr4	20542934	22317724
chr4	22317724	24133906
chr4	24133906	25607700
chr4	25607700	27342100
chr4	27342100	27964246
chr4	27964246	29760586
chr4	29760586	30452913
chr4	30452913	31781359
chr4	31781359	33171144
chr4	33171144	35149793
chr4	35149793	36018814
chr4	36018814	37253425
chr4	37253425	38905401
chr4	38905401	40200989
chr4	40200989	42211041
chr4	42211041	43963028
chr4	43963028	45187140
chr4	45187140	47409879
chr4	47409879	48121583
chr4	48121583	53011266
chr4	53011266	54563389
chr4	54563389	55681477
chr4	55681477	58068842
chr4	58068842	59875369
chr4	59875369	61506045
chr4	61506045	63475283
chr4	63475283	65734774
chr4	65734774	67193779
chr4	67193779	67989047
chr4	67989047	70183435
chr4	70183435	71274841
chr4	71274841	73726673
chr4	73726673	76209554
chr4	76209554	78172825
chr4	78172825	80069143
chr4	80069143	81204161
chr4	81204161	82451440
chr4	82451440	83878503
chr4	83878503	86009456
chr4	86009456	86613495
chr4	86613495	88316876
chr4	88316876	89310413
chr4	89310413	90639526
chr4	90639526	93312148
chr4	93312148	95261037
chr4	95261037	96619552
chr4	96619552	98502916
chr4	98502916	99757203
chr4	99757203	102300199
chr4	102300199	104384137
chr4	104384137	106580148
chr4	106580148	107894192
chr4	107894192	110335411
chr4	110335411	112948946
chr4	112948946	114745090
chr4	114745090	116355773
chr4	116355773	117558763
chr4	117558763	119012357
chr4	119012357	119471529
chr4	119471529	121736832
chr4	121736832	123365326
chr4	123365326	124289707
chr4	124289707	125559731
chr4	125559731	126354322
chr4	126354322	126909138
chr4	126909138	128075510
chr4	128075510	129670730
chr4	129670730	130362666
chr4	130362666	132032878
chr4	132032878	133707279
chr4	133707279	135645252
chr4	135645252	137620817
chr4	137620817	138635357
chr4	138635357	140163477
chr4	140163477	142522112
chr4	142522112	145257035
chr4	145257035	147600722
chr4	147600722	149762428
chr4	149762428	151861032
chr4	151861032	153556489
chr4	153556489	154134974
chr4	154134974	156563945
chr4	156563945	157822566
chr4	157822566	160137712
chr4	160137712	160905283
chr4	160905283	162322527
chr4	162322527	163557082
chr4	163557082	164902296
chr4	164902296	166097706
chr4	166097706	166931766
chr4	166931766	168755674
chr4	168755674	169855359
chr4	169855359	171637484
chr4	171637484	173342981
chr4	173342981	175649565
chr4	175649565	178070756
chr4	178070756	179200889
chr4	179200889	181145654
chr4	181145654	182450122
chr4	182450122	184008302
chr4	184008302	185987936
chr4	185987936	187551827
chr4	187551827	188772357
chr4	188772357	190122439
chr5	11940	982137
chr5	982137	2132328
chr5	2132328	3361827
chr5	3361827	4631997
chr5	4631997	5973120
chr5	5973120	7143105
chr5	7143105	8446223
chr5	8446223	9718720
chr5	9718720	11173159
chr5	11173159	13464722
chr5	13464722	14757695
chr5	14757695	16963504
chr5	16963504	18051483
chr5	18051483	19917607
chr5	19917607	22151964
chr5	22151964	23494215
chr5	23494215	26184742
chr5	26184742	26857495
chr5	26857495	27984406
chr5	27984406	29714713
chr5	29714713	31390142
chr5	31390142	33500075
chr5	33500075	35048865
chr5	35048865	36433852
chr5	36433852	38802308
chr5	38802308	40287627
chr5	40287627	41888608
chr5	41888608	43983397
chr5	43983397	50867564
chr5	50867564	52838788
chr5	52838788	54407214
chr5	54407214	56121522
chr5	56121522	57325275
chr5	57325275	58044246
chr5	58044246	59228796
chr5	59228796	61640080
chr5	61640080	62377168
chr5	62377168	63923160
chr5	63923160	64672477
chr5	64672477	66615458
chr5	66615458	68555033
chr5	68555033	71944629
chr5	71944629	74463501
chr5	74463501	76503041
chr5	76503041	78327508
chr5	78327508	80097321
chr5	80097321	81185652
chr5	81185652	82729829
chr5	82729829	84676871
chr5	84676871	86471473
chr5	86471473	88094174
chr5	88094174	89595713
chr5	89595713	91126837
chr5	91126837	92504835
chr5	92504835	94474279
chr5	94474279	96627815
chr5	96627815	97979897
chr5	97979897	99925288
chr5	99925288	102243065
chr5	102243065	103984304
chr5	103984304	105515782
chr5	105515782	106557354
chr5	106557354	107928495
chr5	107928495	109298233
chr5	109298233	111485446
chr5	111485446	112645865
chr5	112645865	114060588
chr5	114060588	115494673
chr5	115494673	116495351
chr5	116495351	118010518
chr5	118010518	119273125
chr5	119273125	120333347
chr5	120333347	121116471
chr5	121116471	123221211
chr5	123221211	124462407
chr5	124462407	126449957
chr5	126449957	128008912
chr5	128008912	130183332
chr5	130183332	132803957
chr5	132803957	135441711
chr5	135441711	137040361
chr5	137040361	139885487
chr5	139885487	141266403
chr5	141266403	143601683
chr5	143601683	145563791
chr5	145563791	147802435
chr5	147802435	149283061
chr5	149283061	151181737
chr5	151181737	153488214
chr5	153488214	154393528
chr5	154393528	155946495
chr5	155946495	157201689
chr5	157201689	159398690
chr5	159398690	160546937
chr5	160546937	162055127
chr5	162055127	163316902
chr5	163316902	164344576
chr5	164344576	166215390
chr5	166215390	167420735
chr5	167420735	169098313
chr5	169098313	170078660
chr5	170078660	171647288
chr5	171647288	173251324
chr5	173251324	174215868
chr5	174215868	176023592
chr5	176023592	177824506
chr5	177824506	178986463
chr5	178986463	179974244
chr5	179974244	181132933
chr5	181132933	181458155
chr6	73924	1452127
chr6	1452127	2458702
chr6	2458702	3573359
chr6	3573359	4617583
chr6	4617583	5791239
chr6	5791239	6784974
chr6	6784974	7808703
chr6	7808703	9019793
chr6	9019793	10540084
chr6	10540084	11790583
chr6	11790583	13209156
chr6	13209156	14802693
chr6	14802693	17386174
chr6	17386174	19207256
chr6	19207256	21683834
chr6	21683834	22748078
chr6	22748078	23936391
chr6	23936391	24852047
chr6	24852047	25684359
chr6	25684359	26791023
chr6	26791023	28050041
chr6	28050041	28949831
chr6	28949831	29770194
chr6	29770194	30830391
chr6	30830391	31603441
chr6	31603441	32714887
chr6	32714887	33268720
chr6	33268720	35487979
chr6	35487979	37604820
chr6	37604820	39327901
chr6	39327901	40377376
chr6	40377376	42070983
chr6	42070983	43788432
chr6	43788432	45438826
chr6	45438826	47344162
chr6	47344162	48423389
chr6	48423389	50418432
chr6	50418432	52345678
chr6	52345678	53414304
chr6	53414304	55603472
chr6	55603472	56240515
chr6	56240515	60631718
chr6	60631718	61356685
chr6	61356685	62842983
chr6	62842983	65055849
chr6	65055849	66619322
chr6	66619322	68139591
chr6	68139591	68813556
chr6	68813556	70899807
chr6	70899807	72740374
chr6	72740374	74752287
chr6	74752287	76705164
chr6	76705164	78248011
chr6	78248011	79981453
chr6	79981453	81219505
chr6	81219505	82417432
chr6	82417432	84500271
chr6	84500271	86359782
chr6	86359782	88112422
chr6	88112422	89263333
chr6	89263333	91133478
chr6	91133478	92718926
chr6	92718926	93408424
chr6	93408424	93731457
chr6	93731457	96645635
chr6	96645635	97394408
chr6	97394408	100182270
chr6	100182270	102188897
chr6	102188897	103535520
chr6	103535520	105608858
chr6	105608858	107129102
chr6	107129102	108143176
chr6	108143176	109983044
chr6	109983044	112023811
chr6	112023811	113899669
chr6	113899669	115810232
chr6	115810232	117351809
chr6	117351809	118641952
chr6	118641952	119642117
chr6	119642117	120190982
chr6	120190982	121584530
chr6	121584530	123535036
chr6	123535036	125103237
chr6	125103237	127219316
chr6	127219316	129539886
chr6	129539886	130614309
chr6	130614309	132444530
chr6	132444530	133923105
chr6	133923105	135903039
chr6	135903039	137293081
chr6	137293081	138501492
chr6	138501492	139524299
chr6	139524299	141967342
chr6	141967342	144998674
chr6	144998674	146344288
chr6	146344288	148599216
chr6	148599216	149932268
chr6	149932268	151591568
chr6	151591568	152773361
chr6	152773361	154652986
chr6	154652986	156442192
chr6	156442192	157797687
chr6	157797687	160159465
chr6	160159465	161748532
chr6	161748532	162510171
chr6	162510171	163962489
chr6	163962489	165173375
chr6	165173375	166611245
chr6	166611245	167642155
chr6	167642155	168981955
chr6	168981955	170014949
chr6	170014949	170742182
chr7	16161	933116
chr7	933116	1313431
chr7	1313431	2022763
chr7	2022763	2732593
chr7	2732593	4533797
chr7	4533797	5376601
chr7	5376601	5814895
chr7	5814895	6534226
chr7	6534226	7769121
chr7	7769121	9083793
chr7	9083793	9947872
chr7	9947872	11259571
chr7	11259571	12595836
chr7	12595836	13844577
chr7	13844577	15104032
chr7	15104032	16862445
chr7	16862445	19441924
chr7	19441924	20085285
chr7	20085285	22468010
chr7	22468010	23431823
chr7	23431823	25037640
chr7	25037640	25869935
chr7	25869935	28320690
chr7	28320690	31097675
chr7	31097675	33516156
chr7	33516156	36173929
chr7	36173929	37515581
chr7	37515581	38927103
chr7	38927103	39823071
chr7	39823071	41962213
chr7	41962213	43119475
chr7	43119475	44724229
chr7	44724229	45913323
chr7	45913323	46947122
chr7	46947122	49172682
chr7	49172682	51607626
chr7	51607626	53108619
chr7	53108619	54155283
chr7	54155283	55623891
chr7	55623891	57314931
chr7	57314931	63846981
chr7	63846981	64180747
chr7	64180747	66224822
chr7	66224822	68769087
chr7	68769087	69620378
chr7	69620378	72409900
chr7	72409900	73920272
chr7	73920272	76829247
chr7	76829247	78464542
chr7	78464542	80258753
chr7	80258753	82393370
chr7	82393370	84171887
chr7	84171887	85942866
chr7	85942866	88195689
chr7	88195689	91032469
chr7	91032469	92864438
chr7	92864438	94337289
chr7	94337289	96444196
chr7	96444196	97470258
chr7	97470258	99117851
chr7	99117851	100599028
chr7	100599028	101555972
chr7	101555972	103557063
chr7	103557063	104519078
chr7	104519078	106042459
chr7	106042459	108139733
chr7	108139733	110007537
chr7	110007537	112978629
chr7	112978629	114072332
chr7	114072332	117140124
chr7	117140124	118711527
chr7	118711527	121405219
chr7	121405219	122293576
chr7	122293576	124516751
chr7	124516751	124527498
chr7	124527498	126879116
chr7	126879116	127229167
chr7	127229167	129138332
chr7	129138332	130737653
chr7	130737653	133121089
chr7	133121089	134622844
chr7	134622844	135906335
chr7	135906335	137191815
chr7	137191815	139059933
chr7	139059933	140233377
chr7	140233377	140535410
chr7	140535410	141526757
chr7	141526757	142959223
chr7	142959223	145271196
chr7	145271196	146730868
chr7	146730868	148118226
chr7	148118226	150143569
chr7	150143569	151014417
chr7	151014417	152552721
chr7	152552721	153976934
chr7	153976934	155173020
chr7	155173020	156272556
chr7	156272556	157841905
chr7	157841905	159335885
chr8	60422	1094217
chr8	1094217	1213245
chr8	1213245	2095102
chr8	2095102	2715741
chr8	2715741	3535404
chr8	3535404	3925495
chr8	3925495	4622954
chr8	4622954	5289405
chr8	5289405	6285276
chr8	6285276	7295557
chr8	7295557	9297184
chr8	9297184	9783277
chr8	9783277	10605687
chr8	10605687	11421489
chr8	11421489	13634266
chr8	13634266	14087483
chr8	14087483	16134151
chr8	16134151	17530367
chr8	17530367	17978890
chr8	17978890	19635329
chr8	19635329	20203345
chr8	20203345	21804225
chr8	21804225	23039544
chr8	23039544	24817205
chr8	24817205	25625938
chr8	25625938	26825008
chr8	26825008	28304875
chr8	28304875	29470379
chr8	29470379	31276213
chr8	31276213	31690844
chr8	31690844	33119700
chr8	33119700	35459714
chr8	35459714	37521871
chr8	37521871	39081287
chr8	39081287	40845818
chr8	40845818	41863936
chr8	41863936	42918680
chr8	42918680	45929693
chr8	45929693	49169911
chr8	49169911	52390370
chr8	52390370	53505484
chr8	53505484	55033021
chr8	55033021	56043824
chr8	56043824	58156092
chr8	58156092	58815541
chr8	58815541	61416540
chr8	61416540	62436747
chr8	62436747	64320315
chr8	64320315	65576855
chr8	65576855	68950822
chr8	68950822	69955744
chr8	69955744	71377219
chr8	71377219	72904964
chr8	72904964	74532829
chr8	74532829	75544307
chr8	75544307	78220626
chr8	78220626	81044160
chr8	81044160	81781504
chr8	81781504	83313354
chr8	83313354	85043384
chr8	85043384	86399480
chr8	86399480	88073253
chr8	88073253	89625933
chr8	89625933	92542158
chr8	92542158	93993299
chr8	93993299	95522578
chr8	95522578	98389353
chr8	98389353	100608730
chr8	100608730	103111078
chr8	103111078	103976524
chr8	103976524	106398526
chr8	106398526	107635949
chr8	107635949	108235944
chr8	108235944	109472085
chr8	109472085	110838618
chr8	110838618	112052091
chr8	112052091	115084266
chr8	115084266	118673218
chr8	118673218	120189461
chr8	120189461	123849219
chr8	123849219	124671478
chr8	124671478	125398675
chr8	125398675	127646866
chr8	127646866	129368893
chr8	129368893	130627379
chr8	130627379	132338897
chr8	132338897	133557758
chr8	133557758	135023362
chr8	135023362	136511908
chr8	136511908	138242587
chr8	138242587	139713400
chr8	139713400	141963553
chr8	141963553	143155464
chr8	143155464	145078481
chr9	10023	1079707
chr9	1079707	1916877
chr9	1916877	3190064
chr9	3190064	4495328
chr9	4495328	4884926
chr9	4884926	6557589
chr9	6557589	7154923
chr9	7154923	8456299
chr9	8456299	9166403
chr9	9166403	10879253
chr9	10879253	12276489
chr9	12276489	14836365
chr9	14836365	16659657
chr9	16659657	18661053
chr9	18661053	20463536
chr9	20463536	22206560
chr9	22206560	24158520
chr9	24158520	25330812
chr9	25330812	26111759
chr9	26111759	28224285
chr9	28224285	28811586
chr9	28811586	30387394
chr9	30387394	31310385
chr9	31310385	32019370
chr9	32019370	33578336
chr9	33578336	34642246
chr9	34642246	36743286
chr9	36743286	38641602
chr9	38641602	39393282
chr9	39393282	69897795
chr9	69897795	70138839
chr9	70138839	71638124
chr9	71638124	73589030
chr9	73589030	74358165
chr9	74358165	76285267
chr9	76285267	76856292
chr9	76856292	78464139
chr9	78464139	79976013
chr9	79976013	81596318
chr9	81596318	82825886
chr9	82825886	84323281
chr9	84323281	85494418
chr9	85494418	85975502
chr9	85975502	87521331
chr9	87521331	89827251
chr9	89827251	91404921
chr9	91404921	93909416
chr9	93909416	96159758
chr9	96159758	98830577
chr9	98830577	101862155
chr9	101862155	103205694
chr9	103205694	104819468
chr9	104819468	106536473
chr9	106536473	107932781
chr9	107932781	110015744
chr9	110015744	112068802
chr9	112068802	112930865
chr9	112930865	114257521
chr9	114257521	115159681
chr9	115159681	118559259
chr9	118559259	119498019
chr9	119498019	122109043
chr9	122109043	124209608
chr9	124209608	126297386
chr9	126297386	127293231
chr9	127293231	129403191
chr9	129403191	130347830
chr9	130347830	131252501
chr9	131252501	132423455
chr9	132423455	134176000
chr9	134176000	134697518
chr9	134697518	136047132
chr9	136047132	136605890
chr9	136605890	138254346
chr10	14583	705399
chr10	705399	1481349
chr10	1481349	2212306
chr10	2212306	3310507
chr10	3310507	4530082
chr10	4530082	5941799
chr10	5941799	7129522
chr10	7129522	8732702
chr10	8732702	10207433
chr10	10207433	12544798
chr10	12544798	13279600
chr10	13279600	14984069
chr10	14984069	16509768
chr10	16509768	18248338
chr10	18248338	19427949
chr10	19427949	22483354
chr10	22483354	22886203
chr10	22886203	25289667
chr10	25289667	26599755
chr10	26599755	29034307
chr10	29034307	29494763
chr10	29494763	30169909
chr10	30169909	31618591
chr10	31618591	33419040
chr10	33419040	34820427
chr10	34820427	36283580
chr10	36283580	37501101
chr10	37501101	41867628
chr10	41867628	43399323
chr10	43399323	44234627
chr10	44234627	46978910
chr10	46978910	49632869
chr10	49632869	51856869
chr10	51856869	53343812
chr10	53343812	55271380
chr10	55271380	55902386
chr10	55902386	57199768
chr10	57199768	58530227
chr10	58530227	60131651
chr10	60131651	60899921
chr10	60899921	61581937
chr10	61581937	64034354
chr10	64034354	65789857
chr10	65789857	68140391
chr10	68140391	68436234
chr10	68436234	70461094
chr10	70461094	71748755
chr10	71748755	73662792
chr10	73662792	76947056
chr10	76947056	79116992
chr10	79116992	80654923
chr10	80654923	82623989
chr10	82623989	83698947
chr10	83698947	86177820
chr10	86177820	87367307
chr10	87367307	89253624
chr10	89253624	90246824
chr10	90246824	91575290
chr10	91575290	93636611
chr10	93636611	94461486
chr10	94461486	96062600
chr10	96062600	98481545
chr10	98481545	98908643
chr10	98908643	101189482
chr10	101189482	102620653
chr10	102620653	104935290
chr10	104935290	106966928
chr10	106966928	108557947
chr10	108557947	110801735
chr10	110801735	113568673
chr10	113568673	114661647
chr10	114661647	117764423
chr10	117764423	118831841
chr10	118831841	120647811
chr10	120647811	121471951
chr10	121471951	122141030
chr10	122141030	124109830
chr10	124109830	126312529
chr10	126312529	127356098
chr10	127356098	129046020
chr10	129046020	129943063
chr10	129943063	130781981
chr10	130781981	132522825
chr10	132522825	132681169
chr10	132681169	133786540
chr11	70855	1192365
chr11	1192365	3644251
chr11	3644251	4725479
chr11	4725479	6301639
chr11	6301639	7415470
chr11	7415470	8311727
chr11	8311727	9065770
chr11	9065770	10930480
chr11	10930480	12542682
chr11	12542682	13351577
chr11	13351577	15721006
chr11	15721006	17556855
chr11	17556855	19547988
chr11	19547988	20995592
chr11	20995592	22352596
chr11	22352596	24066971
chr11	24066971	26024206
chr11	26024206	26998914
chr11	26998914	28460046
chr11	28460046	30119810
chr11	30119810	32255355
chr11	32255355	33937192
chr11	33937192	35481057
chr11	35481057	37095265
chr11	37095265	39360453
chr11	39360453	42288453
chr11	42288453	44672249
chr11	44672249	46984586
chr11	46984586	49844498
chr11	49844498	54927998
chr11	54927998	55315181
chr11	55315181	58690022
chr11	58690022	59013076
chr11	59013076	62456299
chr11	62456299	64037097
chr11	64037097	66131160
chr11	66131160	68238358
chr11	68238358	69701362
chr11	69701362	71215246
chr11	71215246	72574973
chr11	72574973	74701306
chr11	74701306	77086163
chr11	77086163	78644013
chr11	78644013	81011330
chr11	81011330	81555670
chr11	81555670	84670229
chr11	84670229	86908259
chr11	86908259	87719343
chr11	87719343	89475768
chr11	89475768	91233322
chr11	91233322	92343978
chr11	92343978	93542991
chr11	93542991	94509094
chr11	94509094	95992877
chr11	95992877	97186058
chr11	97186058	98834335
chr11	98834335	100546438
chr11	100546438	101460390
chr11	101460390	104088908
chr11	104088908	105002557
chr11	105002557	106650168
chr11	106650168	107973474
chr11	107973474	108566310
chr11	108566310	109995390
chr11	109995390	111243672
chr11	111243672	112588765
chr11	112588765	114387006
chr11	114387006	114959946
chr11	114959946	116512631
chr11	116512631	117876395
chr11	117876395	119344766
chr11	119344766	120896097
chr11	120896097	121305234
chr11	121305234	122721202
chr11	122721202	123629409
chr11	123629409	124625632
chr11	124625632	126441425
chr11	126441425	127446784
chr11	127446784	128318642
chr11	128318642	130472680
chr11	130472680	131204717
chr11	131204717	133130151
chr11	133130151	134336099
chr11	134336099	135076558
chr12	44631	971165
chr12	971165	2435620
chr12	2435620	3567871
chr12	3567871	4308513
chr12	4308513	5212306
chr12	5212306	6310587
chr12	6310587	8224940
chr12	8224940	8878799
chr12	8878799	10328935
chr12	10328935	11601912
chr12	11601912	12580594
chr12	12580594	15088550
chr12	15088550	16157526
chr12	16157526	17934939
chr12	17934939	20711009
chr12	20711009	23667700
chr12	23667700	25218149
chr12	25218149	27646840
chr12	27646840	29498322
chr12	29498322	30359473
chr12	30359473	32012658
chr12	32012658	32924055
chr12	32924055	37462915
chr12	37462915	38833367
chr12	38833367	40422383
chr12	40422383	41264784
chr12	41264784	43590671
chr12	43590671	45630446
chr12	45630446	47321010
chr12	47321010	48608083
chr12	48608083	51382710
chr12	51382710	52645220
chr12	52645220	54385039
chr12	54385039	55272053
chr12	55272053	57155077
chr12	57155077	58914885
chr12	58914885	60729948
chr12	60729948	63638681
chr12	63638681	65165915
chr12	65165915	66787364
chr12	66787364	67515949
chr12	67515949	69432762
chr12	69432762	70564207
chr12	70564207	72251295
chr12	72251295	73424674
chr12	73424674	76117534
chr12	76117534	78176790
chr12	78176790	80054370
chr12	80054370	81073988
chr12	81073988	83108887
chr12	83108887	83910065
chr12	83910065	85596648
chr12	85596648	89288345
chr12	89288345	91672378
chr12	91672378	94120791
chr12	94120791	95627009
chr12	95627009	96715061
chr12	96715061	98912209
chr12	98912209	101053863
chr12	101053863	101468912
chr12	101468912	102571208
chr12	102571208	104454918
chr12	104454918	106042435
chr12	106042435	106564970
chr12	106564970	108632125
chr12	108632125	109898914
chr12	109898914	112825713
chr12	112825713	113548904
chr12	113548904	114598797
chr12	114598797	115065411
chr12	115065411	116649666
chr12	116649666	117697570
chr12	117697570	119316305
chr12	119316305	121569746
chr12	121569746	124493434
chr12	124493434	125960959
chr12	125960959	127390553
chr12	127390553	128752752
chr12	128752752	129893376
chr12	129893376	131302206
chr12	131302206	132236187
chr12	132236187	133264925
chr13	18445873	20112581
chr13	20112581	21668035
chr13	21668035	23020563
chr13	23020563	23957798
chr13	23957798	25210224
chr13	25210224	26710225
chr13	26710225	28683414
chr13	28683414	29909130
chr13	29909130	31727678
chr13	31727678	33202766
chr13	33202766	34452327
chr13	34452327	35472230
chr13	35472230	36924048
chr13	36924048	38304026
chr13	38304026	40495126
chr13	40495126	42526891
chr13	42526891	44327273
chr13	44327273	45921079
chr13	45921079	46856944
chr13	46856944	48809826
chr13	48809826	51016955
chr13	51016955	52765487
chr13	52765487	54108729
chr13	54108729	55242996
chr13	55242996	56980083
chr13	56980083	57836492
chr13	57836492	58728137
chr13	58728137	60280644
chr13	60280644	61017815
chr13	61017815	63397426
chr13	63397426	64626470
chr13	64626470	67270321
chr13	67270321	70150384
chr13	70150384	70952659
chr13	70952659	73359952
chr13	73359952	75096006
chr13	75096006	76836420
chr13	76836420	78234678
chr13	78234678	80011541
chr13	80011541	82007679
chr13	82007679	83559009
chr13	83559009	85036781
chr13	85036781	87907627
chr13	87907627	89869057
chr13	89869057	92477438
chr13	92477438	92934202
chr13	92934202	95435304
chr13	95435304	96866956
chr13	96866956	98286665
chr13	98286665	99921841
chr13	99921841	101648173
chr13	101648173	103414360
chr13	103414360	104191764
chr13	104191764	105595205
chr13	105595205	106097651
chr13	106097651	107537529
chr13	107537529	108468862
chr13	108468862	109162764
chr13	109162764	110579726
chr13	110579726	111595245
chr13	111595245	112918174
chr13	112918174	114344378
chr14	18225607	21121243
chr14	21121243	22549721
chr14	22549721	24435917
chr14	24435917	25666480
chr14	25666480	27997327
chr14	27997327	29502939
chr14	29502939	31914059
chr14	31914059	34377045
chr14	34377045	35390387
chr14	35390387	38198520
chr14	38198520	39872786
chr14	39872786	41146299
chr14	41146299	42668186
chr14	42668186	44074024
chr14	44074024	45612693
chr14	45612693	46279927
chr14	46279927	48104383
chr14	48104383	48536268
chr14	48536268	50041042
chr14	50041042	51026854
chr14	51026854	53007665
chr14	53007665	53531113
chr14	53531113	54766963
chr14	54766963	55750162
chr14	55750162	57014544
chr14	57014544	58981618
chr14	58981618	61213706
chr14	61213706	63323296
chr14	63323296	64753580
chr14	64753580	65932837
chr14	65932837	67525600
chr14	67525600	70665240
chr14	70665240	72422907
chr14	72422907	75978424
chr14	75978424	76763129
chr14	76763129	78095602
chr14	78095602	79720236
chr14	79720236	81113370
chr14	81113370	82671753
chr14	82671753	83775289
chr14	83775289	85279975
chr14	85279975	86180658
chr14	86180658	87168997
chr14	87168997	89031299
chr14	89031299	90830516
chr14	90830516	92665954
chr14	92665954	93858939
chr14	93858939	95284530
chr14	95284530	95796078
chr14	95796078	97874825
chr14	97874825	98672195
chr14	98672195	101067970
chr14	101067970	102545765
chr14	102545765	104535386
chr14	104535386	105874495
chr14	105874495	106881264
chr15	19795947	20926275
chr15	20926275	23949980
chr15	23949980	24863443
chr15	24863443	27052965
chr15	27052965	29046299
chr15	29046299	29873365
chr15	29873365	31299618
chr15	31299618	32149610
chr15	32149610	33723224
chr15	33723224	34791050
chr15	34791050	37164301
chr15	37164301	38238576
chr15	38238576	40091931
chr15	40091931	40885316
chr15	40885316	42484201
chr15	42484201	43905851
chr15	43905851	46326589
chr15	46326589	47843851
chr15	47843851	49715846
chr15	49715846	51385363
chr15	51385363	52776899
chr15	52776899	54216331
chr15	54216331	54844071
chr15	54844071	56609575
chr15	56609575	58149167
chr15	58149167	59401917
chr15	59401917	60973637
chr15	60973637	62923023
chr15	62923023	64812469
chr15	64812469	66802429
chr15	66802429	68725660
chr15	68725660	69841002
chr15	69841002	71630310
chr15	71630310	73336373
chr15	73336373	76106283
chr15	76106283	78223711
chr15	78223711	80568637
chr15	80568637	83591716
chr15	83591716	86109674
chr15	86109674	87826712
chr15	87826712	89932319
chr15	89932319	91621162
chr15	91621162	93237673
chr15	93237673	94381101
chr15	94381101	95598367
chr15	95598367	97487680
chr15	97487680	98700830
chr15	98700830	100096642
chr15	100096642	101012489
chr15	101012489	101980763
chr16	10054	1157206
chr16	1157206	2714828
chr16	2714828	3951195
chr16	3951195	5068344
chr16	5068344	5841579
chr16	5841579	6843550
chr16	6843550	7479119
chr16	7479119	8288517
chr16	8288517	9705562
chr16	9705562	10332175
chr16	10332175	11426305
chr16	11426305	12519241
chr16	12519241	13060580
chr16	13060580	14370145
chr16	14370145	16060203
chr16	16060203	17550892
chr16	17550892	18632285
chr16	18632285	20139249
chr16	20139249	22437583
chr16	22437583	24125554
chr16	24125554	25975541
chr16	25975541	27434434
chr16	27434434	29025292
chr16	29025292	31371622
chr16	31371622	34586599
chr16	34586599	48974015
chr16	48974015	52001911
chr16	52001911	53348660
chr16	53348660	55869862
chr16	55869862	57630418
chr16	57630418	59011501
chr16	59011501	60711790
chr16	60711790	62195945
chr16	62195945	63657685
chr16	63657685	65904663
chr16	65904663	68807460
chr16	68807460	71020125
chr16	71020125	72901251
chr16	72901251	74937605
chr16	74937605	75944056
chr16	75944056	77489781
chr16	77489781	78422395
chr16	78422395	79100918
chr16	79100918	80263477
chr16	80263477	81738931
chr16	81738931	82714123
chr16	82714123	83443603
chr16	83443603	84412277
chr16	84412277	85115079
chr16	85115079	86122993
chr16	86122993	86781805
chr16	86781805	87613743
chr16	87613743	88974757
chr16	88974757	90226404
chr17	150263	1269105
chr17	1269105	2025437
chr17	2025437	3799018
chr17	3799018	4792966
chr17	4792966	5838014
chr17	5838014	7414079
chr17	7414079	8403107
chr17	8403107	10062604
chr17	10062604	11199498
chr17	11199498	12631452
chr17	12631452	13277055
chr17	13277055	13991320
chr17	13991320	15115780
chr17	15115780	16509028
chr17	16509028	18953007
chr17	18953007	21387045
chr17	21387045	29007226
chr17	29007226	31459473
chr17	31459473	33211407
chr17	33211407	34585779
chr17	34585779	36141651
chr17	36141651	38653091
chr17	38653091	40721152
chr17	40721152	41743558
chr17	41743558	43694719
chr17	43694719	44979537
chr17	44979537	47798656
chr17	47798656	49440038
chr17	49440038	51821597
chr17	51821597	52641695
chr17	52641695	53748757
chr17	53748757	55522071
chr17	55522071	57280180
chr17	57280180	59410151
chr17	59410151	61235394
chr17	61235394	63468228
chr17	63468228	65152010
chr17	65152010	66804312
chr17	66804312	69862629
chr17	69862629	71391676
chr17	71391676	74676064
chr17	74676064	76379479
chr17	76379479	78267332
chr17	78267332	79302554
chr17	79302554	80863788
chr17	80863788	82076532
chr17	82076532	83247139
chr18	10644	912485
chr18	912485	1942910
chr18	1942910	3891658
chr18	3891658	5834181
chr18	5834181	7090486
chr18	7090486	8498933
chr18	8498933	11075914
chr18	11075914	11905441
chr18	11905441	14440800
chr18	14440800	21905883
chr18	21905883	23069508
chr18	23069508	25416687
chr18	25416687	26446227
chr18	26446227	28347718
chr18	28347718	29295622
chr18	29295622	30286513
chr18	30286513	32684103
chr18	32684103	34200103
chr18	34200103	36282001
chr18	36282001	37495287
chr18	37495287	38785526
chr18	38785526	40104403
chr18	40104403	42312683
chr18	42312683	45342141
chr18	45342141	46719283
chr18	46719283	48413361
chr18	48413361	50204214
chr18	50204214	53535815
chr18	53535815	54027805
chr18	54027805	57546606
chr18	57546606	58862988
chr18	58862988	59963251
chr18	59963251	61353518
chr18	61353518	62610482
chr18	62610482	64153018
chr18	64153018	65796166
chr18	65796166	66585564
chr18	66585564	68458580
chr18	68458580	69508584
chr18	69508584	70953943
chr18	70953943	71954382
chr18	71954382	73371239
chr18	73371239	74304227
chr18	74304227	75815032
chr18	75815032	77101859
chr18	77101859	78216317
chr18	78216317	79389991
chr18	79389991	81000000
chr19	80840	610729
chr19	610729	2098397
chr19	2098397	3019662
chr19	3019662	4348970
chr19	4348970	5811841
chr19	5811841	6684874
chr19	6684874	8282629
chr19	8282629	9127717
chr19	9127717	11173352
chr19	11173352	13360313
chr19	13360313	14375535
chr19	14375535	15537799
chr19	15537799	16263605
chr19	16263605	18299052
chr19	18299052	19766662
chr19	19766662	20722951
chr19	20722951	22550094
chr19	22550094	23284944
chr19	23284944	28066986
chr19	28066986	29300040
chr19	29300040	30237047
chr19	30237047	32255614
chr19	32255614	33772047
chr19	33772047	35978393
chr19	35978393	37036131
chr19	37036131	39679979
chr19	39679979	40478694
chr19	40478694	41625199
chr19	41625199	43358303
chr19	43358303	44239955
chr19	44239955	45599439
chr19	45599439	46646825
chr19	46646825	48778970
chr19	48778970	51029311
chr19	51029311	52482037
chr19	52482037	54099074
chr19	54099074	55216712
chr19	55216712	57009967
chr19	57009967	58607472
chr20	79838	716956
chr20	716956	2488855
chr20	2488855	3847766
chr20	3847766	5497204
chr20	5497204	7103426
chr20	7103426	8136364
chr20	8136364	9750273
chr20	9750273	11268888
chr20	11268888	12466851
chr20	12466851	13709217
chr20	13709217	15977714
chr20	15977714	17506587
chr20	17506587	18991559
chr20	18991559	20979069
chr20	20979069	22510818
chr20	22510818	23313153
chr20	23313153	24737088
chr20	24737088	25363595
chr20	25363595	33027017
chr20	33027017	34225635
chr20	34225635	36332043
chr20	36332043	38281128
chr20	38281128	39808119
chr20	39808119	40982216
chr20	40982216	41957049
chr20	41957049	42986820
chr20	42986820	44051536
chr20	44051536	46210417
chr20	46210417	48583442
chr20	48583442	50623121
chr20	50623121	53856010
chr20	53856010	55438728
chr20	55438728	57872903
chr20	57872903	59831517
chr20	59831517	60986668
chr20	60986668	62670503
chr20	62670503	63558827
chr20	63558827	64333810
chr21	8522410	14578661
chr21	14578661	16680846
chr21	16680846	18108057
chr21	18108057	19590025
chr21	19590025	20700449
chr21	20700449	21990556
chr21	21990556	23323909
chr21	23323909	25096809
chr21	25096809	25898707
chr21	25898707	27752907
chr21	27752907	29824708
chr21	29824708	31296327
chr21	31296327	33004691
chr21	33004691	33853161
chr21	33853161	35152076
chr21	35152076	36498481
chr21	36498481	37339402
chr21	37339402	39110976
chr21	39110976	40017600
chr21	40017600	41901419
chr21	41901419	43086158
chr21	43086158	44757190
chr21	44757190	46072312
chr21	46072312	46699840
chr22	15927607	17193405
chr22	17193405	17813322
chr22	17813322	19924835
chr22	19924835	22002927
chr22	22002927	23370460
chr22	23370460	24588236
chr22	24588236	26395662
chr22	26395662	27438791
chr22	27438791	29255810
chr22	29255810	31043932
chr22	31043932	32268999
chr22	32268999	34098925
chr22	34098925	35134992
chr22	35134992	37174229
chr22	37174229	38911889
chr22	38911889	40149793
chr22	40149793	42294812
chr22	42294812	43318194
chr22	43318194	44599428
chr22	44599428	46074615
chr22	46074615	47200568
chr22	47200568	48507891
chr22	48507891	49430885
chr22	49430885	50804870

## Sheet: mQTL-GWAS colocalization result
GWAS	GWAS_region	QTL_Tissue	mCpG	coloc_PP4	fastenloc_RCP	fastenloc_SNP
UKB_1160_Sleep_duration	region1357	ColonTransverse	cg14729498	0.409574	0.4404	chr14_78029689_C_A_b38
UKB_1160_Sleep_duration	region852	ColonTransverse	cg22867950	0.373569	0.3657	chr8_9508275_C_T_b38
UKB_1160_Sleep_duration	region263	Lung	cg26649732	0.640553	0.6221	chr2_224608268_T_C_b38
UKB_1160_Sleep_duration	region198	Ovary	cg17784749	0.352955	0.4616	chr2_113325543_A_G_b38
UKB_1160_Sleep_duration	region263	Prostate	cg26649732	0.80284	0.7735	chr2_224608546_C_T_b38
UKB_1160_Sleep_duration	region853	Testis	cg18477422	0.923316	0.3351	chr8_10422718_G_A_b38
UKB_1160_Sleep_duration	region745	WholeBlood	cg19624444	0.561754	0.431	chr7_2067627_A_C_b38
UKB_1160_Sleep_duration	region853	WholeBlood	cg08841257	0.47171	0.3783	chr8_10422718_G_A_b38
UKB_1180_Morning_or_evening_person_chronotype	region1047	BreastMammaryTissue	cg06564877	0.657477	0.6718	chr10_58797094_C_T_b38
UKB_1180_Morning_or_evening_person_chronotype	region1231	BreastMammaryTissue	cg24566088	0.435368	0.3944	chr12_90010274_T_C_b38
UKB_1180_Morning_or_evening_person_chronotype	region54	BreastMammaryTissue	cg13456504	0.722262	0.745	chr1_90725298_T_A_b38
UKB_1180_Morning_or_evening_person_chronotype	region1231	ColonTransverse	cg24566088	0.472098	0.3202	chr12_90010274_T_C_b38
UKB_1180_Morning_or_evening_person_chronotype	region1520	ColonTransverse	cg09874310	0.417829	0.3308	chr17_67483974_C_A_b38
UKB_1180_Morning_or_evening_person_chronotype	region158	ColonTransverse	cg23473493	0.520287	0.4088	chr2_44044357_C_T_b38
UKB_1180_Morning_or_evening_person_chronotype	region166	ColonTransverse	cg27628985	0.392463	0.3754	chr2_53529418_G_A_b38
UKB_1180_Morning_or_evening_person_chronotype	region285	ColonTransverse	cg18795116	0.74167	0.6852	chr3_14359110_C_T_b38
UKB_1180_Morning_or_evening_person_chronotype	region54	ColonTransverse	cg13456504	0.800243	0.7241	chr1_90725298_T_A_b38
UKB_1180_Morning_or_evening_person_chronotype	region571	ColonTransverse	cg06801352	0.595254	0.4803	chr5_88867954_G_A_b38
UKB_1180_Morning_or_evening_person_chronotype	region54	KidneyCortex	cg13456504	0.763285	0.7099	chr1_90725298_T_A_b38
UKB_1180_Morning_or_evening_person_chronotype	region1120	Lung	cg26985203	0.422092	0.6222	chr11_43871543_G_A_b38
UKB_1180_Morning_or_evening_person_chronotype	region12	Lung	cg08774790	0.468288	0.398	chr1_19699979_A_G_b38
UKB_1180_Morning_or_evening_person_chronotype	region1373	Lung	cg04228836	0.3934	0.3545	chr14_100550487_A_G_b38
UKB_1180_Morning_or_evening_person_chronotype	region1373	Lung	cg17527443	0.8552	0.9077	chr14_100554881_C_A_b38
UKB_1180_Morning_or_evening_person_chronotype	region1496	Lung	cg11245205	0.912456	0.7768	chr17_17494964_G_A_b38
UKB_1180_Morning_or_evening_person_chronotype	region1532	Lung	cg26355573	0.358123	0.3516	chr18_5191236_C_T_b38
UKB_1180_Morning_or_evening_person_chronotype	region158	Lung	cg23473493	0.441679	0.3545	chr2_44044357_C_T_b38
UKB_1180_Morning_or_evening_person_chronotype	region54	Lung	cg13456504	0.747249	0.6603	chr1_90725298_T_A_b38
UKB_1180_Morning_or_evening_person_chronotype	region571	Lung	cg02967097	0.472352	0.4553	chr5_88874514_T_C_b38
UKB_1180_Morning_or_evening_person_chronotype	region571	Lung	cg06801352	0.491009	0.4032	chr5_88861735_T_C_b38
UKB_1180_Morning_or_evening_person_chronotype	region571	Lung	cg14810301	0.48492	0.4361	chr5_88872578_C_G_b38
UKB_1180_Morning_or_evening_person_chronotype	region640	Lung	cg11615758	0.300995	0.3138	chr6_13182763_G_A_b38
UKB_1180_Morning_or_evening_person_chronotype	region1231	MuscleSkeletal	cg24566088	0.398699	0.3485	chr12_90010274_T_C_b38
UKB_1180_Morning_or_evening_person_chronotype	region54	MuscleSkeletal	cg13456504	0.692893	0.7065	chr1_90725298_T_A_b38
UKB_1180_Morning_or_evening_person_chronotype	region158	Ovary	cg23473493	0.336268	0.3157	chr2_44044357_C_T_b38
UKB_1180_Morning_or_evening_person_chronotype	region285	Ovary	cg18795116	0.468232	0.5859	chr3_14359110_C_T_b38
UKB_1180_Morning_or_evening_person_chronotype	region389	Ovary	cg07464113	0.387415	0.5103	chr3_186281095_T_C_b38
UKB_1180_Morning_or_evening_person_chronotype	region389	Ovary	cg08641302	0.367149	0.5398	chr3_186281095_T_C_b38
UKB_1180_Morning_or_evening_person_chronotype	region54	Ovary	cg13456504	0.673308	0.6044	chr1_90725298_T_A_b38
UKB_1180_Morning_or_evening_person_chronotype	region571	Ovary	cg06801352	0.374092	0.4253	chr5_88874514_T_C_b38
UKB_1180_Morning_or_evening_person_chronotype	region737	Ovary	cg27239981	0.454363	0.3087	chr6_165849891_A_G_b38
UKB_1180_Morning_or_evening_person_chronotype	region381	Prostate	cg15681326	0.398878	0.3128	chr3_172631116_A_ACCTC_b38
UKB_1180_Morning_or_evening_person_chronotype	region54	Prostate	cg13456504	0.761466	0.6799	chr1_90725298_T_A_b38
UKB_1180_Morning_or_evening_person_chronotype	region804	Prostate	cg24933060	0.869072	0.8514	chr7_102743243_C_A_b38
UKB_1180_Morning_or_evening_person_chronotype	region158	Testis	cg23473493	0.351154	0.4505	chr2_44044357_C_T_b38
UKB_1180_Morning_or_evening_person_chronotype	region54	Testis	cg13456504	0.759745	0.737	chr1_90725298_T_A_b38
UKB_1180_Morning_or_evening_person_chronotype	region54	WholeBlood	cg13456504	0.751218	0.6947	chr1_90725298_T_A_b38
UKB_1200_Sleeplessness_or_insomnia	region1050	ColonTransverse	cg10354408	0.424819	0.4351	chr10_62726879_T_C_b38
UKB_1200_Sleeplessness_or_insomnia	region1073	ColonTransverse	cg19002713	0.314703	0.4543	chr10_102466184_G_A_b38
UKB_1200_Sleeplessness_or_insomnia	region1508	ColonTransverse	cg00348467	0.589347	0.3939	chr17_45141310_G_A_b38
UKB_1200_Sleeplessness_or_insomnia	region1508	ColonTransverse	cg06100756	0.528538	0.5781	chr17_45144441_G_A_b38
UKB_1200_Sleeplessness_or_insomnia	region1508	ColonTransverse	cg10701640	0.526257	0.3672	chr17_45172077_C_T_b38
UKB_1200_Sleeplessness_or_insomnia	region1508	ColonTransverse	cg10843111	0.44124	0.4495	chr17_45172077_C_T_b38
UKB_1200_Sleeplessness_or_insomnia	region1508	ColonTransverse	cg12410551	0.575163	0.5805	chr17_45144441_G_A_b38
UKB_1200_Sleeplessness_or_insomnia	region1508	ColonTransverse	cg13215995	0.551878	0.345	chr17_45149520_A_G_b38
UKB_1200_Sleeplessness_or_insomnia	region1508	ColonTransverse	cg17372941	0.597377	0.3832	chr17_45141310_G_A_b38
UKB_1200_Sleeplessness_or_insomnia	region198	ColonTransverse	cg27608756	0.504601	0.5604	chr2_113325543_A_G_b38
UKB_1200_Sleeplessness_or_insomnia	region411	ColonTransverse	cg15309905	0.422275	0.3496	chr4_14961915_A_T_b38
UKB_1200_Sleeplessness_or_insomnia	region743	ColonTransverse	cg02869364	0.454533	0.3652	chr7_1042930_C_G_b38
UKB_1200_Sleeplessness_or_insomnia	region743	ColonTransverse	cg07308232	0.541733	0.3957	chr7_1030832_A_G_b38
UKB_1200_Sleeplessness_or_insomnia	region743	ColonTransverse	cg15678885	0.370889	0.4487	chr7_986438_A_G_b38
UKB_1200_Sleeplessness_or_insomnia	region1508	KidneyCortex	cg10701640	0.556012	0.3362	chr17_45170590_A_C_b38
UKB_1200_Sleeplessness_or_insomnia	region743	KidneyCortex	cg06145435	0.371943	0.3183	chr7_984366_T_C_b38
UKB_1200_Sleeplessness_or_insomnia	region743	KidneyCortex	cg10318148	0.468737	0.4747	chr7_984945_T_C_b38
UKB_1200_Sleeplessness_or_insomnia	region1073	Lung	cg05050953	0.479668	0.359	chr10_102514572_G_C_b38
UKB_1200_Sleeplessness_or_insomnia	region1508	Lung	cg00348467	0.472109	0.3298	chr17_45141310_G_A_b38
UKB_1200_Sleeplessness_or_insomnia	region1508	Lung	cg00677574	0.348337	0.3526	chr17_45144272_CT_C_b38
UKB_1200_Sleeplessness_or_insomnia	region1508	Lung	cg06100756	0.634685	0.4767	chr17_45144441_G_A_b38
UKB_1200_Sleeplessness_or_insomnia	region1508	Lung	cg10701640	0.469863	0.3508	chr17_45172077_C_T_b38
UKB_1200_Sleeplessness_or_insomnia	region1508	Lung	cg12410551	0.512889	0.3436	chr17_45141310_G_A_b38
UKB_1200_Sleeplessness_or_insomnia	region1508	Lung	cg13215995	0.578959	0.4322	chr17_45140892_A_G_b38
UKB_1200_Sleeplessness_or_insomnia	region1508	Lung	cg24180402	0.607131	0.5108	chr17_45144272_CT_C_b38
UKB_1200_Sleeplessness_or_insomnia	region1508	Lung	cg27395066	0.627402	0.4879	chr17_45144272_CT_C_b38
UKB_1200_Sleeplessness_or_insomnia	region348	Lung	cg16634544	0.37488	0.3051	chr3_117920594_C_T_b38
UKB_1200_Sleeplessness_or_insomnia	region743	Lung	cg07308232	0.480691	0.3372	chr7_1030832_A_G_b38
UKB_1200_Sleeplessness_or_insomnia	region853	Lung	cg10206601	0.489112	0.6162	chr8_10369358_GC_G_b38
UKB_1200_Sleeplessness_or_insomnia	region1508	MuscleSkeletal	cg06100756	0.691718	0.6254	chr17_45144441_G_A_b38
UKB_1200_Sleeplessness_or_insomnia	region198	MuscleSkeletal	cg17784749	0.55997	0.3512	chr2_113324598_A_G_b38
UKB_1200_Sleeplessness_or_insomnia	region1050	Ovary	cg17975283	0.653327	0.6827	chr10_62762069_G_A_b38
UKB_1200_Sleeplessness_or_insomnia	region1508	Ovary	cg00348467	0.532162	0.531	chr17_45144272_CT_C_b38
UKB_1200_Sleeplessness_or_insomnia	region1508	Ovary	cg10701640	0.538748	0.4002	chr17_45178314_C_G_b38
UKB_1200_Sleeplessness_or_insomnia	region1508	Ovary	cg27395066	0.389282	0.5597	chr17_45144441_G_A_b38
UKB_1200_Sleeplessness_or_insomnia	region198	Ovary	cg17784749	0.586823	0.6274	chr2_113325543_A_G_b38
UKB_1200_Sleeplessness_or_insomnia	region743	Ovary	cg02869364	0.457761	0.3583	chr7_1042930_C_G_b38
UKB_1200_Sleeplessness_or_insomnia	region743	Ovary	cg07308232	0.483328	0.4302	chr7_1032269_T_C_b38
UKB_1200_Sleeplessness_or_insomnia	region743	Ovary	cg10318148	0.343962	0.3355	chr7_984945_T_C_b38
UKB_1200_Sleeplessness_or_insomnia	region743	Ovary	cg12234762	0.336132	0.392	chr7_984945_T_C_b38
UKB_1200_Sleeplessness_or_insomnia	region743	Ovary	cg20905460	0.469728	0.4332	chr7_986438_A_G_b38
UKB_1200_Sleeplessness_or_insomnia	region743	Ovary	cg23391372	0.508325	0.3436	chr7_983555_A_G_b38
UKB_1200_Sleeplessness_or_insomnia	region1508	Prostate	cg00348467	0.395822	0.3856	chr17_45178314_C_G_b38
UKB_1200_Sleeplessness_or_insomnia	region743	Prostate	cg01578764	0.486489	0.3679	chr7_984945_T_C_b38
UKB_1200_Sleeplessness_or_insomnia	region743	Prostate	cg27663279	0.36425	0.3605	chr7_984945_T_C_b38
UKB_1200_Sleeplessness_or_insomnia	region743	Testis	cg07308232	0.307923	0.3673	chr7_1032927_C_G_b38
UKB_1200_Sleeplessness_or_insomnia	region853	Testis	cg17045534	0.463695	0.559	chr8_10369358_GC_G_b38
UKB_1200_Sleeplessness_or_insomnia	region1508	WholeBlood	cg10701640	0.549093	0.3285	chr17_45170590_A_C_b38
UKB_1200_Sleeplessness_or_insomnia	region743	WholeBlood	cg19054158	0.432966	0.3135	chr7_1022891_G_A_b38
UKB_1807_Fathers_age_at_death	region1414	ColonTransverse	cg24369989	0.653884	0.4362	chr15_78565644_C_G_b38
UKB_1807_Fathers_age_at_death	region1414	ColonTransverse	cg24571913	0.659285	0.504	chr15_78622192_C_T_b38
UKB_1807_Fathers_age_at_death	region1414	Ovary	cg24571913	0.448765	0.3432	chr15_78622192_C_T_b38
UKB_20002_1094_self_reported_deep_venous_thrombosis_dvt	region1004	Lung	cg21160290	0.836115	0.3723	chr9_133261703_A_G_b38
UKB_20002_1094_self_reported_deep_venous_thrombosis_dvt	region517	Lung	cg03925904	0.54835	0.4774	chr4_186271327_T_C_b38
UKB_20002_1094_self_reported_deep_venous_thrombosis_dvt	region517	Lung	cg05602360	0.548359	0.4774	chr4_186271327_T_C_b38
UKB_20002_1094_self_reported_deep_venous_thrombosis_dvt	region517	Prostate	cg03925904	0.313231	0.3025	chr4_186271327_T_C_b38
UKB_20002_1094_self_reported_deep_venous_thrombosis_dvt	region517	Prostate	cg05602360	0.313233	0.3027	chr4_186271327_T_C_b38
UKB_20002_1094_self_reported_deep_venous_thrombosis_dvt	region517	Testis	cg05602360	0.353951	0.3196	chr4_186271327_T_C_b38
UKB_20002_1094_self_reported_deep_venous_thrombosis_dvt	region1004	WholeBlood	cg13506600	0.540106	0.3367	chr9_133270074_T_A_b38
UKB_20002_1094_self_reported_deep_venous_thrombosis_dvt	region1004	WholeBlood	cg21160290	0.58101	0.4068	chr9_133270074_T_A_b38
UKB_20002_1094_self_reported_deep_venous_thrombosis_dvt	region1004	WholeBlood	cg22535403	0.584488	0.511	chr9_133261662_G_A_b38
UKB_20002_1094_self_reported_deep_venous_thrombosis_dvt	region1004	WholeBlood	cg24267699	0.578319	0.3279	chr9_133267960_T_C_b38
UKB_20002_1111_self_reported_asthma	region1016	ColonTransverse	cg14207001	0.897565	0.7863	chr10_8473362_T_C_b38
UKB_20002_1111_self_reported_asthma	region1067	ColonTransverse	cg00487187	0.690543	0.5097	chr10_92682235_AG_A_b38
UKB_20002_1111_self_reported_asthma	region1067	ColonTransverse	cg00876273	0.632612	0.4475	chr10_92690476_G_T_b38
UKB_20002_1111_self_reported_asthma	region1067	ColonTransverse	cg03330490	0.541724	0.4379	chr10_92672243_C_T_b38
UKB_20002_1111_self_reported_asthma	region1067	ColonTransverse	cg06523901	0.71292	0.51	chr10_92682235_AG_A_b38
UKB_20002_1111_self_reported_asthma	region1067	ColonTransverse	cg09001573	0.690531	0.5406	chr10_92682235_AG_A_b38
UKB_20002_1111_self_reported_asthma	region1067	ColonTransverse	cg13554586	0.704336	0.5112	chr10_92682235_AG_A_b38
UKB_20002_1111_self_reported_asthma	region1067	ColonTransverse	cg16508068	0.716012	0.5013	chr10_92682235_AG_A_b38
UKB_20002_1111_self_reported_asthma	region1067	ColonTransverse	cg17928459	0.611015	0.5113	chr10_92682235_AG_A_b38
UKB_20002_1111_self_reported_asthma	region1067	ColonTransverse	cg23009123	0.380491	0.4233	chr10_92690476_G_T_b38
UKB_20002_1111_self_reported_asthma	region1067	ColonTransverse	cg26979504	0.618896	0.4825	chr10_92682235_AG_A_b38
UKB_20002_1111_self_reported_asthma	region1067	ColonTransverse	cg27146637	0.658933	0.4861	chr10_92682235_AG_A_b38
UKB_20002_1111_self_reported_asthma	region1129	ColonTransverse	cg03310197	0.812381	0.8314	chr11_65791795_A_G_b38
UKB_20002_1111_self_reported_asthma	region1129	ColonTransverse	cg03725042	0.920374	0.6944	chr11_65791795_A_G_b38
UKB_20002_1111_self_reported_asthma	region1129	ColonTransverse	cg04293602	0.959981	0.9542	chr11_65784486_A_G_b38
UKB_20002_1111_self_reported_asthma	region1129	ColonTransverse	cg14030993	0.820583	0.6944	chr11_65791795_A_G_b38
UKB_20002_1111_self_reported_asthma	region1129	ColonTransverse	cg14417377	0.583998	0.6942	chr11_65791795_A_G_b38
UKB_20002_1111_self_reported_asthma	region1129	ColonTransverse	cg19390314	0.92514	0.8957	chr11_65784486_A_G_b38
UKB_20002_1111_self_reported_asthma	region1129	ColonTransverse	cg22337491	0.882389	0.6944	chr11_65791795_A_G_b38
UKB_20002_1111_self_reported_asthma	region1129	ColonTransverse	cg23220533	0.92726	0.806	chr11_65791795_A_G_b38
UKB_20002_1111_self_reported_asthma	region1129	ColonTransverse	cg26622952	0.820439	0.6944	chr11_65791795_A_G_b38
UKB_20002_1111_self_reported_asthma	region1129	ColonTransverse	cg26683025	0.780888	0.6937	chr11_65791795_A_G_b38
UKB_20002_1111_self_reported_asthma	region1135	ColonTransverse	cg10400081	0.630418	0.5051	chr11_76580110_G_A_b38
UKB_20002_1111_self_reported_asthma	region1164	ColonTransverse	cg00804785	0.482725	0.7438	chr11_118872577_G_A_b38
UKB_20002_1111_self_reported_asthma	region1353	ColonTransverse	cg18825221	0.788549	0.6104	chr14_68283210_G_A_b38
UKB_20002_1111_self_reported_asthma	region137	ColonTransverse	cg06702484	0.886354	0.8296	chr2_8302417_G_A_b38
UKB_20002_1111_self_reported_asthma	region1404	ColonTransverse	cg03300961	0.659375	0.5708	chr15_60777789_C_T_b38
UKB_20002_1111_self_reported_asthma	region1408	ColonTransverse	cg24032190	0.667676	0.8663	chr15_67150258_C_T_b38
UKB_20002_1111_self_reported_asthma	region1438	ColonTransverse	cg16765268	0.675648	0.3335	chr16_11135271_G_T_b38
UKB_20002_1111_self_reported_asthma	region1508	ColonTransverse	cg00686451	0.774193	0.7376	chr17_45282761_A_G_b38
UKB_20002_1111_self_reported_asthma	region1599	ColonTransverse	cg18329753	0.395266	0.971	chr19_33235672_C_A_b38
UKB_20002_1111_self_reported_asthma	region1599	ColonTransverse	cg27586885	0.953905	0.9714	chr19_33235672_C_A_b38
UKB_20002_1111_self_reported_asthma	region275	ColonTransverse	cg02698622	0.999438	0.9985	chr2_241759225_G_A_b38
UKB_20002_1111_self_reported_asthma	region275	ColonTransverse	cg05260375	0.713344	0.386	chr2_241771867_G_A_b38
UKB_20002_1111_self_reported_asthma	region275	ColonTransverse	cg17365725	0.999442	0.9985	chr2_241759225_G_A_b38
UKB_20002_1111_self_reported_asthma	region649	ColonTransverse	cg00631329	0.702491	0.618	chr6_26327725_G_A_b38
UKB_20002_1111_self_reported_asthma	region690	ColonTransverse	cg18749651	0.368899	0.3273	chr6_90274316_C_T_b38
UKB_20002_1111_self_reported_asthma	region710	ColonTransverse	cg16465083	0.65034	0.7556	chr6_121441087_T_C_b38
UKB_20002_1111_self_reported_asthma	region85	ColonTransverse	cg16600909	0.624484	0.4079	chr1_173175878_A_G_b38
UKB_20002_1111_self_reported_asthma	region85	ColonTransverse	cg24633390	0.54116	0.3928	chr1_173172821_A_C_b38
UKB_20002_1111_self_reported_asthma	region897	ColonTransverse	cg09533845	0.780208	0.4522	chr8_80376690_G_T_b38
UKB_20002_1111_self_reported_asthma	region951	ColonTransverse	cg01383724	0.664077	0.4448	chr9_23587813_A_C_b38
UKB_20002_1111_self_reported_asthma	region1251	KidneyCortex	cg18971251	0.583466	0.594	chr12_120935886_C_T_b38
UKB_20002_1111_self_reported_asthma	region275	KidneyCortex	cg02698622	0.999424	0.9986	chr2_241759225_G_A_b38
UKB_20002_1111_self_reported_asthma	region275	KidneyCortex	cg17365725	0.999425	0.9987	chr2_241759225_G_A_b38
UKB_20002_1111_self_reported_asthma	region656	KidneyCortex	cg24129356	0.968868	0.8681	chr6_32715035_C_A_b38
UKB_20002_1111_self_reported_asthma	region85	KidneyCortex	cg16600909	0.609536	0.446	chr1_173175878_A_G_b38
UKB_20002_1111_self_reported_asthma	region1016	Lung	cg14207001	0.896243	0.7836	chr10_8473362_T_C_b38
UKB_20002_1111_self_reported_asthma	region1067	Lung	cg16508068	0.489837	0.4201	chr10_92690476_G_T_b38
UKB_20002_1111_self_reported_asthma	region1067	Lung	cg25093409	0.658692	0.5922	chr10_92672243_C_T_b38
UKB_20002_1111_self_reported_asthma	region1127	Lung	cg15598662	0.347316	0.3625	chr11_61820833_A_G_b38
UKB_20002_1111_self_reported_asthma	region1129	Lung	cg07008379	0.986759	0.9745	chr11_65784486_A_G_b38
UKB_20002_1111_self_reported_asthma	region1129	Lung	cg10604040	0.91899	0.6915	chr11_65791795_A_G_b38
UKB_20002_1111_self_reported_asthma	region1129	Lung	cg14417377	0.824407	0.6915	chr11_65791795_A_G_b38
UKB_20002_1111_self_reported_asthma	region1129	Lung	cg20026499	0.802164	0.6915	chr11_65791795_A_G_b38
UKB_20002_1111_self_reported_asthma	region1129	Lung	cg26622952	0.852981	0.6915	chr11_65791795_A_G_b38
UKB_20002_1111_self_reported_asthma	region1129	Lung	cg26683025	0.842353	0.6915	chr11_65791795_A_G_b38
UKB_20002_1111_self_reported_asthma	region1233	Lung	cg07533511	0.717254	0.3062	chr12_94187358_A_G_b38
UKB_20002_1111_self_reported_asthma	region1251	Lung	cg18971251	0.617232	0.4023	chr12_120926032_C_T_b38
UKB_20002_1111_self_reported_asthma	region1353	Lung	cg18825221	0.793127	0.6062	chr14_68283210_G_A_b38
UKB_20002_1111_self_reported_asthma	region137	Lung	cg06702484	0.884775	0.8292	chr2_8303673_G_A_b38
UKB_20002_1111_self_reported_asthma	region1404	Lung	cg03300961	0.398095	0.3962	chr15_60763212_C_T_b38
UKB_20002_1111_self_reported_asthma	region1438	Lung	cg10155983	0.427297	0.3661	chr16_11136846_T_C_b38
UKB_20002_1111_self_reported_asthma	region1438	Lung	cg16765268	0.603729	0.3494	chr16_11135271_G_T_b38
UKB_20002_1111_self_reported_asthma	region1508	Lung	cg00686451	0.822405	0.6969	chr17_45283983_C_G_b38
UKB_20002_1111_self_reported_asthma	region1668	Lung	cg00994804	0.427623	0.3336	chr21_35087401_G_A_b38
UKB_20002_1111_self_reported_asthma	region1668	Lung	cg02869559	0.389444	0.3701	chr21_35051694_C_T_b38
UKB_20002_1111_self_reported_asthma	region1668	Lung	cg03142697	0.512212	0.4874	chr21_35051694_C_T_b38
UKB_20002_1111_self_reported_asthma	region1668	Lung	cg06176221	0.367602	0.3787	chr21_35051694_C_T_b38
UKB_20002_1111_self_reported_asthma	region1668	Lung	cg09889857	0.454686	0.4308	chr21_35087401_G_A_b38
UKB_20002_1111_self_reported_asthma	region1668	Lung	cg12083928	0.51633	0.4054	chr21_35051694_C_T_b38
UKB_20002_1111_self_reported_asthma	region1668	Lung	cg12477880	0.392361	0.3864	chr21_35051694_C_T_b38
UKB_20002_1111_self_reported_asthma	region1668	Lung	cg14937633	0.457773	0.384	chr21_35051694_C_T_b38
UKB_20002_1111_self_reported_asthma	region1668	Lung	cg20418711	0.441943	0.4073	chr21_35087401_G_A_b38
UKB_20002_1111_self_reported_asthma	region1668	Lung	cg22698744	0.537814	0.5357	chr21_35051694_C_T_b38
UKB_20002_1111_self_reported_asthma	region1668	Lung	cg22866426	0.536768	0.4521	chr21_35051694_C_T_b38
UKB_20002_1111_self_reported_asthma	region1668	Lung	cg26974661	0.463444	0.4641	chr21_35051694_C_T_b38
UKB_20002_1111_self_reported_asthma	region275	Lung	cg02698622	0.999457	0.9985	chr2_241759225_G_A_b38
UKB_20002_1111_self_reported_asthma	region275	Lung	cg17365725	0.999457	0.9985	chr2_241759225_G_A_b38
UKB_20002_1111_self_reported_asthma	region396	Lung	cg17657502	0.891505	0.9993	chr3_196632439_G_A_b38
UKB_20002_1111_self_reported_asthma	region428	Lung	cg10387769	0.705202	0.5049	chr4_38797027_C_A_b38
UKB_20002_1111_self_reported_asthma	region612	Lung	cg25077558	0.368627	0.4217	chr5_157564500_G_A_b38
UKB_20002_1111_self_reported_asthma	region649	Lung	cg00631329	0.726343	0.5273	chr6_26319360_G_T_b38
UKB_20002_1111_self_reported_asthma	region649	Lung	cg13736514	0.749496	0.5273	chr6_26319360_G_T_b38
UKB_20002_1111_self_reported_asthma	region764	Lung	cg11187739	0.707278	0.4954	chr7_28117268_C_T_b38
UKB_20002_1111_self_reported_asthma	region82	Lung	cg00080417	0.761446	0.6415	chr1_167448647_C_T_b38
UKB_20002_1111_self_reported_asthma	region82	Lung	cg22356347	0.783388	0.7257	chr1_167448647_C_T_b38
UKB_20002_1111_self_reported_asthma	region85	Lung	cg16600909	0.623238	0.5285	chr1_173183234_C_CAGAAAG_b38
UKB_20002_1111_self_reported_asthma	region897	Lung	cg09533845	0.699676	0.4321	chr8_80376690_G_T_b38
UKB_20002_1111_self_reported_asthma	region951	Lung	cg01383724	0.696555	0.5591	chr9_23587813_A_C_b38
UKB_20002_1111_self_reported_asthma	region1159	MuscleSkeletal	cg11344533	0.381432	0.3085	chr11_111603392_G_A_b38
UKB_20002_1111_self_reported_asthma	region1353	MuscleSkeletal	cg11006288	0.58792	0.6211	chr14_68293424_C_T_b38
UKB_20002_1111_self_reported_asthma	region1353	MuscleSkeletal	cg18825221	0.656804	0.6231	chr14_68283210_G_A_b38
UKB_20002_1111_self_reported_asthma	region1504	MuscleSkeletal	cg21499348	0.517807	0.4226	chr17_39905186_T_C_b38
UKB_20002_1111_self_reported_asthma	region85	MuscleSkeletal	cg16600909	0.590482	0.4123	chr1_173178443_T_G_b38
UKB_20002_1111_self_reported_asthma	region940	MuscleSkeletal	cg03798910	0.939466	0.9568	chr9_6210099_T_C_b38
UKB_20002_1111_self_reported_asthma	region1067	Ovary	cg03330490	0.698586	0.559	chr10_92672243_C_T_b38
UKB_20002_1111_self_reported_asthma	region1067	Ovary	cg06523901	0.605407	0.3865	chr10_92682235_AG_A_b38
UKB_20002_1111_self_reported_asthma	region1067	Ovary	cg07616394	0.629805	0.4683	chr10_92672243_C_T_b38
UKB_20002_1111_self_reported_asthma	region1067	Ovary	cg13554586	0.611761	0.5117	chr10_92682235_AG_A_b38
UKB_20002_1111_self_reported_asthma	region1067	Ovary	cg14451882	0.363926	0.3478	chr10_92672243_C_T_b38
UKB_20002_1111_self_reported_asthma	region1067	Ovary	cg15605600	0.402081	0.3113	chr10_92682235_AG_A_b38
UKB_20002_1111_self_reported_asthma	region1067	Ovary	cg16508068	0.470434	0.4035	chr10_92682235_AG_A_b38
UKB_20002_1111_self_reported_asthma	region1067	Ovary	cg25093409	0.491478	0.582	chr10_92672243_C_T_b38
UKB_20002_1111_self_reported_asthma	region1067	Ovary	cg27146637	0.573272	0.4765	chr10_92682235_AG_A_b38
UKB_20002_1111_self_reported_asthma	region1094	Ovary	cg12967833	0.375555	0.351	chr11_1117256_C_T_b38
UKB_20002_1111_self_reported_asthma	region1127	Ovary	cg19610905	0.619682	0.4243	chr11_61820833_A_G_b38
UKB_20002_1111_self_reported_asthma	region1129	Ovary	cg14030993	0.810774	0.6873	chr11_65791795_A_G_b38
UKB_20002_1111_self_reported_asthma	region1129	Ovary	cg22337491	0.914538	0.6873	chr11_65791795_A_G_b38
UKB_20002_1111_self_reported_asthma	region1164	Ovary	cg00804785	0.494855	0.3153	chr11_118873687_C_G_b38
UKB_20002_1111_self_reported_asthma	region1233	Ovary	cg05055747	0.831793	0.6978	chr12_94203186_G_A_b38
UKB_20002_1111_self_reported_asthma	region1251	Ovary	cg18971251	0.626847	0.387	chr12_120925924_C_CGATTTTCA_b38
UKB_20002_1111_self_reported_asthma	region1353	Ovary	cg18825221	0.623162	0.4396	chr14_68287700_T_C_b38
UKB_20002_1111_self_reported_asthma	region1504	Ovary	cg10057218	0.542286	0.595	chr17_39900944_G_A_b38
UKB_20002_1111_self_reported_asthma	region1508	Ovary	cg00686451	0.649777	0.7485	chr17_45282761_A_G_b38
UKB_20002_1111_self_reported_asthma	region1508	Ovary	cg01961214	0.562026	0.5853	chr17_45259320_G_C_b38
UKB_20002_1111_self_reported_asthma	region543	Ovary	cg01027405	0.463793	0.4015	chr5_35861050_C_G_b38
UKB_20002_1111_self_reported_asthma	region645	Ovary	cg15541384	0.672708	0.4161	chr6_21886258_T_C_b38
UKB_20002_1111_self_reported_asthma	region649	Ovary	cg00631329	0.752386	0.4124	chr6_26338029_A_G_b38
UKB_20002_1111_self_reported_asthma	region649	Ovary	cg13736514	0.673618	0.3927	chr6_26335118_C_G_b38
UKB_20002_1111_self_reported_asthma	region653	Ovary	cg06206827	0.771468	0.4855	chr6_30745519_G_A_b38
UKB_20002_1111_self_reported_asthma	region653	Ovary	cg09131512	0.728295	0.5828	chr6_30745519_G_A_b38
UKB_20002_1111_self_reported_asthma	region657	Ovary	cg02856860	0.457498	0.6546	chr6_35171952_A_G_b38
UKB_20002_1111_self_reported_asthma	region82	Ovary	cg22356347	0.771806	0.6858	chr1_167448647_C_T_b38
UKB_20002_1111_self_reported_asthma	region85	Ovary	cg24633390	0.603433	0.3861	chr1_173195648_T_C_b38
UKB_20002_1111_self_reported_asthma	region951	Ovary	cg01383724	0.642745	0.4629	chr9_23585037_C_A_b38
UKB_20002_1111_self_reported_asthma	region1016	Prostate	cg14207001	0.454143	0.3347	chr10_8473385_C_T_b38
UKB_20002_1111_self_reported_asthma	region1067	Prostate	cg25093409	0.324112	0.5176	chr10_92669710_C_T_b38
UKB_20002_1111_self_reported_asthma	region1129	Prostate	cg10604040	0.815647	0.7121	chr11_65791795_A_G_b38
UKB_20002_1111_self_reported_asthma	region1129	Prostate	cg22337491	0.730606	0.7121	chr11_65791795_A_G_b38
UKB_20002_1111_self_reported_asthma	region1159	Prostate	cg01101960	0.470435	0.3548	chr11_111603392_G_A_b38
UKB_20002_1111_self_reported_asthma	region1353	Prostate	cg18825221	0.702368	0.5715	chr14_68283210_G_A_b38
UKB_20002_1111_self_reported_asthma	region275	Prostate	cg00910029	0.999423	0.9986	chr2_241759225_G_A_b38
UKB_20002_1111_self_reported_asthma	region275	Prostate	cg02698622	0.999423	0.9986	chr2_241759225_G_A_b38
UKB_20002_1111_self_reported_asthma	region275	Prostate	cg17365725	0.999423	0.9986	chr2_241759225_G_A_b38
UKB_20002_1111_self_reported_asthma	region649	Prostate	cg00631329	0.696737	0.5521	chr6_26307423_T_C_b38
UKB_20002_1111_self_reported_asthma	region82	Prostate	cg22356347	0.787326	0.7241	chr1_167448647_C_T_b38
UKB_20002_1111_self_reported_asthma	region85	Prostate	cg16600909	0.604257	0.431	chr1_173175878_A_G_b38
UKB_20002_1111_self_reported_asthma	region897	Prostate	cg09533845	0.694564	0.5021	chr8_80376690_G_T_b38
UKB_20002_1111_self_reported_asthma	region951	Prostate	cg01383724	0.630805	0.4638	chr9_23587228_A_C_b38
UKB_20002_1111_self_reported_asthma	region1135	Testis	cg10400081	0.611004	0.4802	chr11_76588605_C_A_b38
UKB_20002_1111_self_reported_asthma	region1353	Testis	cg18825221	0.633578	0.5251	chr14_68283210_G_A_b38
UKB_20002_1111_self_reported_asthma	region137	Testis	cg06702484	0.836143	0.8006	chr2_8302417_G_A_b38
UKB_20002_1111_self_reported_asthma	region275	Testis	cg02698622	0.918607	0.9973	chr2_241759225_G_A_b38
UKB_20002_1111_self_reported_asthma	region82	Testis	cg18469283	0.409823	0.3578	chr1_167457187_G_A_b38
UKB_20002_1111_self_reported_asthma	region1016	WholeBlood	cg14207001	0.682298	0.4328	chr10_8473362_T_C_b38
UKB_20002_1111_self_reported_asthma	region102	WholeBlood	cg14873633	0.521086	0.4149	chr1_203121848_C_T_b38
UKB_20002_1111_self_reported_asthma	region102	WholeBlood	cg22903543	0.467281	0.3899	chr1_203131901_G_A_b38
UKB_20002_1111_self_reported_asthma	region1127	WholeBlood	cg19481605	0.319376	0.3455	chr11_61825533_A_G_b38
UKB_20002_1111_self_reported_asthma	region1129	WholeBlood	cg14030993	0.793465	0.7193	chr11_65791795_A_G_b38
UKB_20002_1111_self_reported_asthma	region1129	WholeBlood	cg22337491	0.793465	0.7193	chr11_65791795_A_G_b38
UKB_20002_1111_self_reported_asthma	region1353	WholeBlood	cg18825221	0.312069	0.3605	chr14_68261708_C_T_b38
UKB_20002_1111_self_reported_asthma	region137	WholeBlood	cg06702484	0.760488	0.8237	chr2_8302417_G_A_b38
UKB_20002_1111_self_reported_asthma	region1438	WholeBlood	cg07242609	0.699723	0.6057	chr16_11131207_C_G_b38
UKB_20002_1111_self_reported_asthma	region275	WholeBlood	cg07689252	0.960436	0.61	chr2_241759225_G_A_b38
UKB_20002_1111_self_reported_asthma	region690	WholeBlood	cg18477569	0.414895	0.3361	chr6_90270626_C_G_b38
UKB_20002_1111_self_reported_asthma	region85	WholeBlood	cg16600909	0.574093	0.424	chr1_173175878_A_G_b38
UKB_20002_1222_self_reported_type_1_diabetes	region653	ColonTransverse	cg08420066	0.606863	0.6711	chr6_30801949_C_T_b38
UKB_20002_1223_self_reported_type_2_diabetes	region1612	ColonTransverse	cg24062375	0.604065	0.6007	chr19_53445571_T_G_b38
UKB_20002_1223_self_reported_type_2_diabetes	region1612	Ovary	cg24062375	0.642884	0.7034	chr19_53445571_T_G_b38
UKB_20002_1226_self_reported_hypothyroidism_or_myxoedema	region1147	BreastMammaryTissue	cg09673061	0.95089	0.6447	chr11_95578258_T_C_b38
UKB_20002_1226_self_reported_hypothyroidism_or_myxoedema	region1487	BreastMammaryTissue	cg02448825	0.913698	0.8491	chr17_7337072_C_T_b38
UKB_20002_1226_self_reported_hypothyroidism_or_myxoedema	region1487	BreastMammaryTissue	cg02676175	0.906409	0.9007	chr17_7337072_C_T_b38
UKB_20002_1226_self_reported_hypothyroidism_or_myxoedema	region1487	BreastMammaryTissue	cg06721232	0.916112	0.8958	chr17_7337072_C_T_b38
UKB_20002_1226_self_reported_hypothyroidism_or_myxoedema	region1487	BreastMammaryTissue	cg07925670	0.919741	0.8559	chr17_7337072_C_T_b38
UKB_20002_1226_self_reported_hypothyroidism_or_myxoedema	region1487	BreastMammaryTissue	cg20217592	0.920372	0.8535	chr17_7337072_C_T_b38
UKB_20002_1226_self_reported_hypothyroidism_or_myxoedema	region738	BreastMammaryTissue	cg05460996	0.556118	0.3307	chr6_166956865_G_T_b38
UKB_20002_1226_self_reported_hypothyroidism_or_myxoedema	region1072	ColonTransverse	cg07044859	0.974649	0.9267	chr10_99523573_C_A_b38
UKB_20002_1226_self_reported_hypothyroidism_or_myxoedema	region1072	ColonTransverse	cg14748795	0.973342	0.9271	chr10_99523573_C_A_b38
UKB_20002_1226_self_reported_hypothyroidism_or_myxoedema	region1072	ColonTransverse	cg17888390	0.97394	0.9278	chr10_99523573_C_A_b38
UKB_20002_1226_self_reported_hypothyroidism_or_myxoedema	region1085	ColonTransverse	cg14498942	0.657644	0.4415	chr10_122385640_A_G_b38
UKB_20002_1226_self_reported_hypothyroidism_or_myxoedema	region1085	ColonTransverse	cg19863426	0.671517	0.4853	chr10_122380251_G_A_b38
UKB_20002_1226_self_reported_hypothyroidism_or_myxoedema	region1116	ColonTransverse	cg19695151	0.519951	0.3522	chr11_35296165_T_C_b38
UKB_20002_1226_self_reported_hypothyroidism_or_myxoedema	region1147	ColonTransverse	cg09673061	0.99949	0.9978	chr11_95578258_T_C_b38
UKB_20002_1226_self_reported_hypothyroidism_or_myxoedema	region1212	ColonTransverse	cg05487307	0.38278	0.3186	chr12_56041628_G_A_b38
UKB_20002_1226_self_reported_hypothyroidism_or_myxoedema	region1244	ColonTransverse	cg07932199	0.511933	0.31	chr12_111569952_C_T_b38
UKB_20002_1226_self_reported_hypothyroidism_or_myxoedema	region1353	ColonTransverse	cg18825221	0.848914	0.7177	chr14_68283210_G_A_b38
UKB_20002_1226_self_reported_hypothyroidism_or_myxoedema	region1390	ColonTransverse	cg22603971	0.572265	0.4155	chr15_38558129_T_C_b38
UKB_20002_1226_self_reported_hypothyroidism_or_myxoedema	region139	ColonTransverse	cg05866504	0.974333	0.9649	chr2_12504610_C_T_b38
UKB_20002_1226_self_reported_hypothyroidism_or_myxoedema	region1463	ColonTransverse	cg23695209	0.549813	0.3855	chr16_67499395_A_G_b38
UKB_20002_1226_self_reported_hypothyroidism_or_myxoedema	region1477	ColonTransverse	cg09395612	0.760341	0.7143	chr16_85985910_G_C_b38
UKB_20002_1226_self_reported_hypothyroidism_or_myxoedema	region1487	ColonTransverse	cg02448825	0.926009	0.8317	chr17_7337072_C_T_b38
UKB_20002_1226_self_reported_hypothyroidism_or_myxoedema	region1487	ColonTransverse	cg02676175	0.921141	0.8317	chr17_7337072_C_T_b38
UKB_20002_1226_self_reported_hypothyroidism_or_myxoedema	region1487	ColonTransverse	cg03666441	0.926012	0.8317	chr17_7337072_C_T_b38
UKB_20002_1226_self_reported_hypothyroidism_or_myxoedema	region1487	ColonTransverse	cg05164926	0.926012	0.8317	chr17_7337072_C_T_b38
UKB_20002_1226_self_reported_hypothyroidism_or_myxoedema	region1487	ColonTransverse	cg06721232	0.925985	0.8317	chr17_7337072_C_T_b38
UKB_20002_1226_self_reported_hypothyroidism_or_myxoedema	region1487	ColonTransverse	cg07148458	0.926012	0.8317	chr17_7337072_C_T_b38
UKB_20002_1226_self_reported_hypothyroidism_or_myxoedema	region1487	ColonTransverse	cg07520074	0.926012	0.8317	chr17_7337072_C_T_b38
UKB_20002_1226_self_reported_hypothyroidism_or_myxoedema	region1487	ColonTransverse	cg07639694	0.92601	0.8317	chr17_7337072_C_T_b38
UKB_20002_1226_self_reported_hypothyroidism_or_myxoedema	region1487	ColonTransverse	cg07925670	0.926012	0.8317	chr17_7337072_C_T_b38
UKB_20002_1226_self_reported_hypothyroidism_or_myxoedema	region1487	ColonTransverse	cg12418947	0.92484	0.831	chr17_7337072_C_T_b38
UKB_20002_1226_self_reported_hypothyroidism_or_myxoedema	region1487	ColonTransverse	cg15713546	0.912188	0.8317	chr17_7337072_C_T_b38
UKB_20002_1226_self_reported_hypothyroidism_or_myxoedema	region1487	ColonTransverse	cg20217592	0.926012	0.8317	chr17_7337072_C_T_b38
UKB_20002_1226_self_reported_hypothyroidism_or_myxoedema	region1487	ColonTransverse	cg25900902	0.92601	0.8317	chr17_7337072_C_T_b38
UKB_20002_1226_self_reported_hypothyroidism_or_myxoedema	region1506	ColonTransverse	cg16208084	0.384611	0.57	chr17_42127885_G_A_b38
UKB_20002_1226_self_reported_hypothyroidism_or_myxoedema	region1506	ColonTransverse	cg26934993	0.712497	0.6852	chr17_42127885_G_A_b38
UKB_20002_1226_self_reported_hypothyroidism_or_myxoedema	region1583	ColonTransverse	cg00428638	0.851327	0.7892	chr19_7222366_G_C_b38
UKB_20002_1226_self_reported_hypothyroidism_or_myxoedema	region1583	ColonTransverse	cg02992714	0.914215	0.8223	chr19_7224420_G_A_b38
UKB_20002_1226_self_reported_hypothyroidism_or_myxoedema	region1583	ColonTransverse	cg07545014	0.915962	0.8234	chr19_7224420_G_A_b38
UKB_20002_1226_self_reported_hypothyroidism_or_myxoedema	region1583	ColonTransverse	cg09779027	0.91315	0.8245	chr19_7224420_G_A_b38
UKB_20002_1226_self_reported_hypothyroidism_or_myxoedema	region1590	ColonTransverse	cg15084902	0.551148	0.3347	chr19_18277183_A_G_b38
UKB_20002_1226_self_reported_hypothyroidism_or_myxoedema	region1692	ColonTransverse	cg05209515	0.724453	0.3787	chr22_37190632_A_C_b38
UKB_20002_1226_self_reported_hypothyroidism_or_myxoedema	region1692	ColonTransverse	cg14757173	0.531467	0.3503	chr22_37185637_C_T_b38
UKB_20002_1226_self_reported_hypothyroidism_or_myxoedema	region349	ColonTransverse	cg00261569	0.525145	0.4963	chr3_119498465_C_T_b38
UKB_20002_1226_self_reported_hypothyroidism_or_myxoedema	region419	ColonTransverse	cg06535121	0.701593	0.532	chr4_26088753_A_G_b38
UKB_20002_1226_self_reported_hypothyroidism_or_myxoedema	region579	ColonTransverse	cg05225461	0.565596	0.4784	chr5_103261591_G_T_b38
UKB_20002_1226_self_reported_hypothyroidism_or_myxoedema	region579	ColonTransverse	cg21184216	0.536292	0.469	chr5_103261455_G_A_b38
UKB_20002_1226_self_reported_hypothyroidism_or_myxoedema	region599	ColonTransverse	cg02545790	0.63705	0.6108	chr5_134086053_G_A_b38
UKB_20002_1226_self_reported_hypothyroidism_or_myxoedema	region651	ColonTransverse	cg02675264	0.735033	0.3889	chr6_28703566_G_C_b38
UKB_20002_1226_self_reported_hypothyroidism_or_myxoedema	region651	ColonTransverse	cg08638886	0.817707	0.3114	chr6_28737297_G_T_b38
UKB_20002_1226_self_reported_hypothyroidism_or_myxoedema	region651	ColonTransverse	cg09012858	0.73441	0.4012	chr6_28703566_G_C_b38
UKB_20002_1226_self_reported_hypothyroidism_or_myxoedema	region651	ColonTransverse	cg14132236	0.735052	0.3889	chr6_28703566_G_C_b38
UKB_20002_1226_self_reported_hypothyroidism_or_myxoedema	region658	ColonTransverse	cg02569698	0.813869	0.5782	chr6_35570187_C_T_b38
UKB_20002_1226_self_reported_hypothyroidism_or_myxoedema	region738	ColonTransverse	cg17991206	0.649042	0.6436	chr6_166968316_A_G_b38
UKB_20002_1226_self_reported_hypothyroidism_or_myxoedema	region768	ColonTransverse	cg23496403	0.30379	0.3097	chr7_37367076_T_C_b38
UKB_20002_1226_self_reported_hypothyroidism_or_myxoedema	region77	ColonTransverse	cg24892963	0.661559	0.4841	chr1_156815825_G_A_b38
UKB_20002_1226_self_reported_hypothyroidism_or_myxoedema	region803	ColonTransverse	cg12276455	0.67674	0.4342	chr7_100695291_T_C_b38
UKB_20002_1226_self_reported_hypothyroidism_or_myxoedema	region919	ColonTransverse	cg19620294	0.667066	0.4134	chr8_118965098_A_G_b38
UKB_20002_1226_self_reported_hypothyroidism_or_myxoedema	region940	ColonTransverse	cg12273426	0.839353	0.6481	chr9_5438435_C_A_b38
UKB_20002_1226_self_reported_hypothyroidism_or_myxoedema	region940	ColonTransverse	cg16051589	0.848379	0.6481	chr9_5438435_C_A_b38
UKB_20002_1226_self_reported_hypothyroidism_or_myxoedema	region1072	KidneyCortex	cg07044859	0.948343	0.9278	chr10_99523573_C_A_b38
UKB_20002_1226_self_reported_hypothyroidism_or_myxoedema	region1147	KidneyCortex	cg09673061	0.998888	0.9167	chr11_95578258_T_C_b38
UKB_20002_1226_self_reported_hypothyroidism_or_myxoedema	region1590	KidneyCortex	cg21293810	0.723957	0.5693	chr19_18273312_A_G_b38
UKB_20002_1226_self_reported_hypothyroidism_or_myxoedema	region349	KidneyCortex	cg00261569	0.567034	0.549	chr3_119498465_C_T_b38
UKB_20002_1226_self_reported_hypothyroidism_or_myxoedema	region430	KidneyCortex	cg07801448	0.430686	0.3191	chr4_40354763_G_A_b38
UKB_20002_1226_self_reported_hypothyroidism_or_myxoedema	region430	KidneyCortex	cg16205251	0.415294	0.3093	chr4_40354763_G_A_b38
UKB_20002_1226_self_reported_hypothyroidism_or_myxoedema	region579	KidneyCortex	cg05225461	0.529246	0.394	chr5_103264823_G_A_b38
UKB_20002_1226_self_reported_hypothyroidism_or_myxoedema	region630	KidneyCortex	cg13299325	0.338941	0.3618	chr6_434364_A_G_b38
UKB_20002_1226_self_reported_hypothyroidism_or_myxoedema	region738	KidneyCortex	cg05460996	0.533684	0.3477	chr6_166956865_G_T_b38
UKB_20002_1226_self_reported_hypothyroidism_or_myxoedema	region803	KidneyCortex	cg12276455	0.63142	0.4589	chr7_100686887_TG_T_b38
UKB_20002_1226_self_reported_hypothyroidism_or_myxoedema	region0	Lung	cg04343794	0.570085	0.3233	chr1_1206343_A_G_b38
UKB_20002_1226_self_reported_hypothyroidism_or_myxoedema	region1072	Lung	cg00158122	0.933471	0.9188	chr10_99523573_C_A_b38
UKB_20002_1226_self_reported_hypothyroidism_or_myxoedema	region1072	Lung	cg02798576	0.681386	0.7562	chr10_99523573_C_A_b38
UKB_20002_1226_self_reported_hypothyroidism_or_myxoedema	region1072	Lung	cg07044859	0.97199	0.9223	chr10_99523573_C_A_b38
UKB_20002_1226_self_reported_hypothyroidism_or_myxoedema	region1072	Lung	cg14748795	0.790804	0.899	chr10_99523573_C_A_b38
UKB_20002_1226_self_reported_hypothyroidism_or_myxoedema	region1072	Lung	cg17888390	0.972006	0.9223	chr10_99523573_C_A_b38
UKB_20002_1226_self_reported_hypothyroidism_or_myxoedema	region1085	Lung	cg19863426	0.628959	0.5369	chr10_122380251_G_A_b38
UKB_20002_1226_self_reported_hypothyroidism_or_myxoedema	region1147	Lung	cg09673061	0.999418	0.9983	chr11_95578258_T_C_b38
UKB_20002_1226_self_reported_hypothyroidism_or_myxoedema	region1264	Lung	cg25643223	0.302841	0.5068	chr13_24211331_C_T_b38
UKB_20002_1226_self_reported_hypothyroidism_or_myxoedema	region132	Lung	cg06500727	0.925313	0.8436	chr2_1413427_G_A_b38
UKB_20002_1226_self_reported_hypothyroidism_or_myxoedema	region1353	Lung	cg18825221	0.831433	0.6686	chr14_68283210_G_A_b38
UKB_20002_1226_self_reported_hypothyroidism_or_myxoedema	region1390	Lung	cg17164630	0.630477	0.3954	chr15_38558129_T_C_b38
UKB_20002_1226_self_reported_hypothyroidism_or_myxoedema	region1390	Lung	cg22603971	0.596874	0.3963	chr15_38558129_T_C_b38
UKB_20002_1226_self_reported_hypothyroidism_or_myxoedema	region139	Lung	cg05866504	0.916297	0.9701	chr2_12504610_C_T_b38
UKB_20002_1226_self_reported_hypothyroidism_or_myxoedema	region1463	Lung	cg23695209	0.517178	0.3719	chr16_67499395_A_G_b38
UKB_20002_1226_self_reported_hypothyroidism_or_myxoedema	region1477	Lung	cg16701852	0.730192	0.6706	chr16_85985910_G_C_b38
UKB_20002_1226_self_reported_hypothyroidism_or_myxoedema	region1487	Lung	cg02448825	0.916457	0.8203	chr17_7337072_C_T_b38
UKB_20002_1226_self_reported_hypothyroidism_or_myxoedema	region1487	Lung	cg02676175	0.916457	0.8203	chr17_7337072_C_T_b38
UKB_20002_1226_self_reported_hypothyroidism_or_myxoedema	region1487	Lung	cg03666441	0.916457	0.8203	chr17_7337072_C_T_b38
UKB_20002_1226_self_reported_hypothyroidism_or_myxoedema	region1487	Lung	cg03982355	0.824581	0.8365	chr17_7330793_C_G_b38
UKB_20002_1226_self_reported_hypothyroidism_or_myxoedema	region1487	Lung	cg05164926	0.916457	0.8203	chr17_7337072_C_T_b38
UKB_20002_1226_self_reported_hypothyroidism_or_myxoedema	region1487	Lung	cg06721232	0.916457	0.8203	chr17_7337072_C_T_b38
UKB_20002_1226_self_reported_hypothyroidism_or_myxoedema	region1487	Lung	cg07148458	0.916457	0.8203	chr17_7337072_C_T_b38
UKB_20002_1226_self_reported_hypothyroidism_or_myxoedema	region1487	Lung	cg07520074	0.916457	0.8203	chr17_7337072_C_T_b38
UKB_20002_1226_self_reported_hypothyroidism_or_myxoedema	region1487	Lung	cg07639694	0.916454	0.8203	chr17_7337072_C_T_b38
UKB_20002_1226_self_reported_hypothyroidism_or_myxoedema	region1487	Lung	cg07925670	0.916457	0.8203	chr17_7337072_C_T_b38
UKB_20002_1226_self_reported_hypothyroidism_or_myxoedema	region1487	Lung	cg15713546	0.916457	0.8203	chr17_7337072_C_T_b38
UKB_20002_1226_self_reported_hypothyroidism_or_myxoedema	region1487	Lung	cg17557735	0.809836	0.8203	chr17_7337072_C_T_b38
UKB_20002_1226_self_reported_hypothyroidism_or_myxoedema	region1487	Lung	cg20217592	0.916457	0.8203	chr17_7337072_C_T_b38
UKB_20002_1226_self_reported_hypothyroidism_or_myxoedema	region1487	Lung	cg25900902	0.916457	0.8203	chr17_7337072_C_T_b38
UKB_20002_1226_self_reported_hypothyroidism_or_myxoedema	region1506	Lung	cg05346140	0.638246	0.5027	chr17_42145640_C_G_b38
UKB_20002_1226_self_reported_hypothyroidism_or_myxoedema	region1506	Lung	cg07168142	0.578259	0.4682	chr17_42126504_C_T_b38
UKB_20002_1226_self_reported_hypothyroidism_or_myxoedema	region1506	Lung	cg08880849	0.76068	0.6905	chr17_42126504_C_T_b38
UKB_20002_1226_self_reported_hypothyroidism_or_myxoedema	region1506	Lung	cg16208084	0.694465	0.6519	chr17_42126504_C_T_b38
UKB_20002_1226_self_reported_hypothyroidism_or_myxoedema	region1568	Lung	cg18477104	0.523094	0.3555	chr18_69869381_T_C_b38
UKB_20002_1226_self_reported_hypothyroidism_or_myxoedema	region1583	Lung	cg00428638	0.884208	0.7805	chr19_7224339_C_T_b38
UKB_20002_1226_self_reported_hypothyroidism_or_myxoedema	region1583	Lung	cg02992714	0.906225	0.8148	chr19_7224420_G_A_b38
UKB_20002_1226_self_reported_hypothyroidism_or_myxoedema	region1583	Lung	cg07545014	0.906158	0.8136	chr19_7224420_G_A_b38
UKB_20002_1226_self_reported_hypothyroidism_or_myxoedema	region1583	Lung	cg09779027	0.906225	0.8131	chr19_7224420_G_A_b38
UKB_20002_1226_self_reported_hypothyroidism_or_myxoedema	region1590	Lung	cg15084902	0.85419	0.7517	chr19_18273312_A_G_b38
UKB_20002_1226_self_reported_hypothyroidism_or_myxoedema	region1610	Lung	cg05001580	0.69952	0.6384	chr19_49694149_A_G_b38
UKB_20002_1226_self_reported_hypothyroidism_or_myxoedema	region1610	Lung	cg14440600	0.931931	0.8261	chr19_49694149_A_G_b38
UKB_20002_1226_self_reported_hypothyroidism_or_myxoedema	region1610	Lung	cg14480394	0.81335	0.6062	chr19_49691142_G_C_b38
UKB_20002_1226_self_reported_hypothyroidism_or_myxoedema	region1610	Lung	cg17968523	0.870254	0.3582	chr19_49694149_A_G_b38
UKB_20002_1226_self_reported_hypothyroidism_or_myxoedema	region1610	Lung	cg19875973	0.885457	0.6778	chr19_49691142_G_C_b38
UKB_20002_1226_self_reported_hypothyroidism_or_myxoedema	region1687	Lung	cg00310014	0.561871	0.6423	chr22_30123163_T_C_b38
UKB_20002_1226_self_reported_hypothyroidism_or_myxoedema	region1692	Lung	cg05209515	0.796352	0.4272	chr22_37190632_A_C_b38
UKB_20002_1226_self_reported_hypothyroidism_or_myxoedema	region1692	Lung	cg11793380	0.448456	0.3149	chr22_37191071_A_C_b38
UKB_20002_1226_self_reported_hypothyroidism_or_myxoedema	region349	Lung	cg00261569	0.715595	0.481	chr3_119498465_C_T_b38
UKB_20002_1226_self_reported_hypothyroidism_or_myxoedema	region579	Lung	cg05225461	0.528055	0.3142	chr5_103268000_A_G_b38
UKB_20002_1226_self_reported_hypothyroidism_or_myxoedema	region652	Lung	cg06343355	0.829707	0.8539	chr6_29545432_G_C_b38
UKB_20002_1226_self_reported_hypothyroidism_or_myxoedema	region652	Lung	cg18342026	0.817739	0.8527	chr6_29545432_G_C_b38
UKB_20002_1226_self_reported_hypothyroidism_or_myxoedema	region654	Lung	cg17849733	0.952997	0.3311	chr6_31114212_T_C_b38
UKB_20002_1226_self_reported_hypothyroidism_or_myxoedema	region690	Lung	cg16571137	0.604528	0.3943	chr6_90283848_G_A_b38
UKB_20002_1226_self_reported_hypothyroidism_or_myxoedema	region738	Lung	cg11815910	0.65349	0.37	chr6_166956742_T_C_b38
UKB_20002_1226_self_reported_hypothyroidism_or_myxoedema	region803	Lung	cg12276455	0.657756	0.3924	chr7_100686887_TG_T_b38
UKB_20002_1226_self_reported_hypothyroidism_or_myxoedema	region927	Lung	cg20482639	0.325679	0.408	chr8_132907041_G_A_b38
UKB_20002_1226_self_reported_hypothyroidism_or_myxoedema	region940	Lung	cg12273426	0.662401	0.6299	chr9_5438435_C_A_b38
UKB_20002_1226_self_reported_hypothyroidism_or_myxoedema	region940	Lung	cg16051589	0.728071	0.6299	chr9_5438435_C_A_b38
UKB_20002_1226_self_reported_hypothyroidism_or_myxoedema	region1116	MuscleSkeletal	cg09324712	0.470343	0.3298	chr11_35295868_A_G_b38
UKB_20002_1226_self_reported_hypothyroidism_or_myxoedema	region1147	MuscleSkeletal	cg09673061	0.998029	0.9979	chr11_95578258_T_C_b38
UKB_20002_1226_self_reported_hypothyroidism_or_myxoedema	region1353	MuscleSkeletal	cg11006288	0.486412	0.5463	chr14_68293424_C_T_b38
UKB_20002_1226_self_reported_hypothyroidism_or_myxoedema	region1353	MuscleSkeletal	cg18825221	0.833591	0.7216	chr14_68283210_G_A_b38
UKB_20002_1226_self_reported_hypothyroidism_or_myxoedema	region419	MuscleSkeletal	cg16847428	0.633331	0.4413	chr4_26093692_A_G_b38
UKB_20002_1226_self_reported_hypothyroidism_or_myxoedema	region430	MuscleSkeletal	cg08943292	0.488348	0.3678	chr4_40342878_G_A_b38
UKB_20002_1226_self_reported_hypothyroidism_or_myxoedema	region430	MuscleSkeletal	cg16205251	0.542422	0.4243	chr4_40342878_G_A_b38
UKB_20002_1226_self_reported_hypothyroidism_or_myxoedema	region517	MuscleSkeletal	cg22062306	0.985303	0.9793	chr4_186082920_C_T_b38
UKB_20002_1226_self_reported_hypothyroidism_or_myxoedema	region738	MuscleSkeletal	cg05460996	0.532493	0.3169	chr6_166956865_G_T_b38
UKB_20002_1226_self_reported_hypothyroidism_or_myxoedema	region1116	Ovary	cg09324712	0.455897	0.3037	chr11_35296165_T_C_b38
UKB_20002_1226_self_reported_hypothyroidism_or_myxoedema	region1147	Ovary	cg09673061	0.995212	0.9156	chr11_95578258_T_C_b38
UKB_20002_1226_self_reported_hypothyroidism_or_myxoedema	region1212	Ovary	cg09401696	0.484158	0.3489	chr12_55975722_A_G_b38
UKB_20002_1226_self_reported_hypothyroidism_or_myxoedema	region12	Ovary	cg07848608	0.810688	0.6946	chr1_19508921_G_A_b38
UKB_20002_1226_self_reported_hypothyroidism_or_myxoedema	region132	Ovary	cg06500727	0.906866	0.8315	chr2_1413427_G_A_b38
UKB_20002_1226_self_reported_hypothyroidism_or_myxoedema	region1353	Ovary	cg18825221	0.754817	0.6192	chr14_68287978_G_A_b38
UKB_20002_1226_self_reported_hypothyroidism_or_myxoedema	region1390	Ovary	cg25864633	0.826492	0.757	chr15_38535939_G_T_b38
UKB_20002_1226_self_reported_hypothyroidism_or_myxoedema	region139	Ovary	cg05866504	0.846356	0.9587	chr2_12504610_C_T_b38
UKB_20002_1226_self_reported_hypothyroidism_or_myxoedema	region1463	Ovary	cg23695209	0.466487	0.352	chr16_67442669_A_G_b38
UKB_20002_1226_self_reported_hypothyroidism_or_myxoedema	region1487	Ovary	cg02448825	0.754459	0.7703	chr17_7323638_G_A_b38
UKB_20002_1226_self_reported_hypothyroidism_or_myxoedema	region1487	Ovary	cg02676175	0.611718	0.8487	chr17_7337072_C_T_b38
UKB_20002_1226_self_reported_hypothyroidism_or_myxoedema	region1487	Ovary	cg07520074	0.720585	0.6816	chr17_7337072_C_T_b38
UKB_20002_1226_self_reported_hypothyroidism_or_myxoedema	region1487	Ovary	cg07925670	0.871095	0.8358	chr17_7323638_G_A_b38
UKB_20002_1226_self_reported_hypothyroidism_or_myxoedema	region1487	Ovary	cg17557735	0.805423	0.8068	chr17_7337072_C_T_b38
UKB_20002_1226_self_reported_hypothyroidism_or_myxoedema	region1489	Ovary	cg06020462	0.7288	0.6633	chr17_8973188_G_T_b38
UKB_20002_1226_self_reported_hypothyroidism_or_myxoedema	region1506	Ovary	cg01501896	0.43206	0.6796	chr17_42127885_G_A_b38
UKB_20002_1226_self_reported_hypothyroidism_or_myxoedema	region1506	Ovary	cg02968557	0.466647	0.7392	chr17_42126504_C_T_b38
UKB_20002_1226_self_reported_hypothyroidism_or_myxoedema	region1506	Ovary	cg16208084	0.339242	0.6855	chr17_42126504_C_T_b38
UKB_20002_1226_self_reported_hypothyroidism_or_myxoedema	region1506	Ovary	cg26934993	0.583246	0.7204	chr17_42126504_C_T_b38
UKB_20002_1226_self_reported_hypothyroidism_or_myxoedema	region1590	Ovary	cg15084902	0.791203	0.7038	chr19_18273312_A_G_b38
UKB_20002_1226_self_reported_hypothyroidism_or_myxoedema	region1610	Ovary	cg00449201	0.666188	0.6015	chr19_49691142_G_C_b38
UKB_20002_1226_self_reported_hypothyroidism_or_myxoedema	region1610	Ovary	cg14440600	0.762824	0.5918	chr19_49691142_G_C_b38
UKB_20002_1226_self_reported_hypothyroidism_or_myxoedema	region349	Ovary	cg16958524	0.408549	0.3691	chr3_119525008_T_A_b38
UKB_20002_1226_self_reported_hypothyroidism_or_myxoedema	region419	Ovary	cg06535121	0.544888	0.49	chr4_26088753_A_G_b38
UKB_20002_1226_self_reported_hypothyroidism_or_myxoedema	region579	Ovary	cg05225461	0.494394	0.3916	chr5_103261115_G_T_b38
UKB_20002_1226_self_reported_hypothyroidism_or_myxoedema	region579	Ovary	cg17259761	0.338201	0.3177	chr5_103260191_C_G_b38
UKB_20002_1226_self_reported_hypothyroidism_or_myxoedema	region579	Ovary	cg21184216	0.502778	0.4077	chr5_103261455_G_A_b38
UKB_20002_1226_self_reported_hypothyroidism_or_myxoedema	region630	Ovary	cg12671632	0.422866	0.359	chr6_446093_T_A_b38
UKB_20002_1226_self_reported_hypothyroidism_or_myxoedema	region651	Ovary	cg02675264	0.398344	0.3013	chr6_28703566_G_C_b38
UKB_20002_1226_self_reported_hypothyroidism_or_myxoedema	region651	Ovary	cg09012858	0.429971	0.3419	chr6_28703566_G_C_b38
UKB_20002_1226_self_reported_hypothyroidism_or_myxoedema	region803	Ovary	cg12276455	0.392469	0.3473	chr7_100683273_A_C_b38
UKB_20002_1226_self_reported_hypothyroidism_or_myxoedema	region851	Ovary	cg06384827	0.648019	0.4773	chr8_8461340_T_C_b38
UKB_20002_1226_self_reported_hypothyroidism_or_myxoedema	region851	Ovary	cg09479314	0.631021	0.4752	chr8_8461340_T_C_b38
UKB_20002_1226_self_reported_hypothyroidism_or_myxoedema	region924	Ovary	cg07018107	0.805855	0.7992	chr8_128152952_T_G_b38
UKB_20002_1226_self_reported_hypothyroidism_or_myxoedema	region932	Ovary	cg17481940	0.431725	0.4365	chr8_140632136_A_G_b38
UKB_20002_1226_self_reported_hypothyroidism_or_myxoedema	region940	Ovary	cg12273426	0.792779	0.6088	chr9_5438435_C_A_b38
UKB_20002_1226_self_reported_hypothyroidism_or_myxoedema	region940	Ovary	cg16051589	0.756486	0.6088	chr9_5438435_C_A_b38
UKB_20002_1226_self_reported_hypothyroidism_or_myxoedema	region1015	Prostate	cg01476568	0.967616	0.9615	chr10_6068912_C_A_b38
UKB_20002_1226_self_reported_hypothyroidism_or_myxoedema	region1072	Prostate	cg11232245	0.421364	0.3313	chr10_99518298_A_G_b38
UKB_20002_1226_self_reported_hypothyroidism_or_myxoedema	region1147	Prostate	cg09673061	0.999385	0.9984	chr11_95578258_T_C_b38
UKB_20002_1226_self_reported_hypothyroidism_or_myxoedema	region1353	Prostate	cg18825221	0.825433	0.7645	chr14_68285926_C_T_b38
UKB_20002_1226_self_reported_hypothyroidism_or_myxoedema	region1390	Prostate	cg21002317	0.775062	0.7934	chr15_38535939_G_T_b38
UKB_20002_1226_self_reported_hypothyroidism_or_myxoedema	region1487	Prostate	cg03666441	0.911528	0.8348	chr17_7337072_C_T_b38
UKB_20002_1226_self_reported_hypothyroidism_or_myxoedema	region1487	Prostate	cg06721232	0.87811	0.6496	chr17_7337072_C_T_b38
UKB_20002_1226_self_reported_hypothyroidism_or_myxoedema	region1487	Prostate	cg07148458	0.736604	0.8308	chr17_7337072_C_T_b38
UKB_20002_1226_self_reported_hypothyroidism_or_myxoedema	region1487	Prostate	cg07520074	0.912044	0.8348	chr17_7337072_C_T_b38
UKB_20002_1226_self_reported_hypothyroidism_or_myxoedema	region1506	Prostate	cg02968557	0.758763	0.7629	chr17_42127885_G_A_b38
UKB_20002_1226_self_reported_hypothyroidism_or_myxoedema	region1506	Prostate	cg06545335	0.482781	0.685	chr17_42126504_C_T_b38
UKB_20002_1226_self_reported_hypothyroidism_or_myxoedema	region1581	Prostate	cg03690798	0.923379	0.9673	chr19_4837545_C_A_b38
UKB_20002_1226_self_reported_hypothyroidism_or_myxoedema	region1590	Prostate	cg15084902	0.7689	0.8149	chr19_18272984_C_T_b38
UKB_20002_1226_self_reported_hypothyroidism_or_myxoedema	region579	Prostate	cg05225461	0.568859	0.531	chr5_103261591_G_T_b38
UKB_20002_1226_self_reported_hypothyroidism_or_myxoedema	region599	Prostate	cg14780083	0.660124	0.5877	chr5_134083250_A_G_b38
UKB_20002_1226_self_reported_hypothyroidism_or_myxoedema	region630	Prostate	cg13299325	0.65395	0.5517	chr6_446093_T_A_b38
UKB_20002_1226_self_reported_hypothyroidism_or_myxoedema	region648	Prostate	cg14030158	0.575763	0.507	chr6_25418866_T_C_b38
UKB_20002_1226_self_reported_hypothyroidism_or_myxoedema	region650	Prostate	cg19041857	0.819551	0.9668	chr6_27867657_A_G_b38
UKB_20002_1226_self_reported_hypothyroidism_or_myxoedema	region738	Prostate	cg05460996	0.69455	0.6156	chr6_166966850_A_C_b38
UKB_20002_1226_self_reported_hypothyroidism_or_myxoedema	region77	Prostate	cg24892963	0.460504	0.4691	chr1_156813500_C_T_b38
UKB_20002_1226_self_reported_hypothyroidism_or_myxoedema	region851	Prostate	cg13126121	0.675272	0.4229	chr8_8462453_G_C_b38
UKB_20002_1226_self_reported_hypothyroidism_or_myxoedema	region1116	Testis	cg09324712	0.448773	0.3481	chr11_35296165_T_C_b38
UKB_20002_1226_self_reported_hypothyroidism_or_myxoedema	region1147	Testis	cg09673061	0.99358	0.9927	chr11_95578258_T_C_b38
UKB_20002_1226_self_reported_hypothyroidism_or_myxoedema	region132	Testis	cg06500727	0.822343	0.3803	chr2_1413427_G_A_b38
UKB_20002_1226_self_reported_hypothyroidism_or_myxoedema	region1353	Testis	cg18825221	0.653704	0.732	chr14_68283210_G_A_b38
UKB_20002_1226_self_reported_hypothyroidism_or_myxoedema	region738	Testis	cg05460996	0.572012	0.376	chr6_166956865_G_T_b38
UKB_20002_1226_self_reported_hypothyroidism_or_myxoedema	region853	Testis	cg18477422	0.964941	0.3824	chr8_10422718_G_A_b38
UKB_20002_1226_self_reported_hypothyroidism_or_myxoedema	region1072	WholeBlood	cg01987516	0.881812	0.871	chr10_99523573_C_A_b38
UKB_20002_1226_self_reported_hypothyroidism_or_myxoedema	region1072	WholeBlood	cg07044859	0.968296	0.9338	chr10_99523573_C_A_b38
UKB_20002_1226_self_reported_hypothyroidism_or_myxoedema	region1072	WholeBlood	cg14748795	0.968297	0.9338	chr10_99523573_C_A_b38
UKB_20002_1226_self_reported_hypothyroidism_or_myxoedema	region1072	WholeBlood	cg17888390	0.968287	0.9339	chr10_99523573_C_A_b38
UKB_20002_1226_self_reported_hypothyroidism_or_myxoedema	region1072	WholeBlood	cg23904955	0.968262	0.933	chr10_99523573_C_A_b38
UKB_20002_1226_self_reported_hypothyroidism_or_myxoedema	region1116	WholeBlood	cg09324712	0.467423	0.3585	chr11_35296165_T_C_b38
UKB_20002_1226_self_reported_hypothyroidism_or_myxoedema	region1147	WholeBlood	cg09673061	0.999338	0.9815	chr11_95578258_T_C_b38
UKB_20002_1226_self_reported_hypothyroidism_or_myxoedema	region132	WholeBlood	cg06500727	0.794005	0.8608	chr2_1413427_G_A_b38
UKB_20002_1226_self_reported_hypothyroidism_or_myxoedema	region1353	WholeBlood	cg18825221	0.39585	0.322	chr14_68265588_AAT_A_b38
UKB_20002_1226_self_reported_hypothyroidism_or_myxoedema	region1390	WholeBlood	cg22603971	0.608378	0.4362	chr15_38558129_T_C_b38
UKB_20002_1226_self_reported_hypothyroidism_or_myxoedema	region1487	WholeBlood	cg03666441	0.790671	0.8444	chr17_7337072_C_T_b38
UKB_20002_1226_self_reported_hypothyroidism_or_myxoedema	region1487	WholeBlood	cg06721232	0.752165	0.8302	chr17_7337072_C_T_b38
UKB_20002_1226_self_reported_hypothyroidism_or_myxoedema	region1487	WholeBlood	cg07148458	0.906072	0.8445	chr17_7337072_C_T_b38
UKB_20002_1226_self_reported_hypothyroidism_or_myxoedema	region1487	WholeBlood	cg07520074	0.906066	0.8438	chr17_7337072_C_T_b38
UKB_20002_1226_self_reported_hypothyroidism_or_myxoedema	region1487	WholeBlood	cg13925686	0.889559	0.8448	chr17_7337072_C_T_b38
UKB_20002_1226_self_reported_hypothyroidism_or_myxoedema	region1487	WholeBlood	cg14050954	0.895546	0.7932	chr17_7337072_C_T_b38
UKB_20002_1226_self_reported_hypothyroidism_or_myxoedema	region1487	WholeBlood	cg15713546	0.890776	0.8434	chr17_7337072_C_T_b38
UKB_20002_1226_self_reported_hypothyroidism_or_myxoedema	region1487	WholeBlood	cg20217592	0.849836	0.8374	chr17_7337072_C_T_b38
UKB_20002_1226_self_reported_hypothyroidism_or_myxoedema	region1487	WholeBlood	cg25900902	0.906017	0.8446	chr17_7337072_C_T_b38
UKB_20002_1226_self_reported_hypothyroidism_or_myxoedema	region1506	WholeBlood	cg00582337	0.819797	0.7595	chr17_42126504_C_T_b38
UKB_20002_1226_self_reported_hypothyroidism_or_myxoedema	region1506	WholeBlood	cg07168142	0.693072	0.7636	chr17_42127885_G_A_b38
UKB_20002_1226_self_reported_hypothyroidism_or_myxoedema	region853	WholeBlood	cg08841257	0.511418	0.3809	chr8_10422718_G_A_b38
UKB_20002_1265_self_reported_migraine	region1	ColonTransverse	cg01961086	0.597956	0.3794	chr1_3168622_C_T_b38
UKB_20002_1265_self_reported_migraine	region268	ColonTransverse	cg12488871	0.405729	0.4827	chr2_233916724_G_A_b38
UKB_20002_1265_self_reported_migraine	region70	ColonTransverse	cg00168706	0.566051	0.5288	chr1_115135325_C_A_b38
UKB_20002_1265_self_reported_migraine	region70	ColonTransverse	cg15897102	0.408484	0.5204	chr1_115134562_T_C_b38
UKB_20002_1265_self_reported_migraine	region77	ColonTransverse	cg18266783	0.473639	0.4032	chr1_156494637_C_A_b38
UKB_20002_1265_self_reported_migraine	region1	Lung	cg01413848	0.531302	0.3534	chr1_3168622_C_T_b38
UKB_20002_1265_self_reported_migraine	region1	Lung	cg03391389	0.561402	0.4095	chr1_3182574_G_C_b38
UKB_20002_1265_self_reported_migraine	region1	Lung	cg06182121	0.493747	0.3882	chr1_3168622_C_T_b38
UKB_20002_1265_self_reported_migraine	region70	Lung	cg00168706	0.565983	0.5007	chr1_115135325_C_A_b38
UKB_20002_1265_self_reported_migraine	region77	Lung	cg06759845	0.408421	0.3427	chr1_156489743_C_T_b38
UKB_20002_1265_self_reported_migraine	region77	Lung	cg08123045	0.420996	0.4423	chr1_156496907_G_A_b38
UKB_20002_1265_self_reported_migraine	region77	Lung	cg17787876	0.406915	0.3522	chr1_156494637_C_A_b38
UKB_20002_1265_self_reported_migraine	region1212	Ovary	cg10233454	0.910185	0.9653	chr12_57133500_T_C_b38
UKB_20002_1265_self_reported_migraine	region1212	Ovary	cg16377117	0.370009	0.9685	chr12_57133500_T_C_b38
UKB_20002_1265_self_reported_migraine	region268	Ovary	cg12488871	0.485	0.4975	chr2_233916724_G_A_b38
UKB_20002_1265_self_reported_migraine	region640	Ovary	cg02098414	0.996434	0.9997	chr6_12903725_A_G_b38
UKB_20002_1265_self_reported_migraine	region694	Ovary	cg20540345	0.599531	0.4573	chr6_96611893_A_C_b38
UKB_20002_1265_self_reported_migraine	region77	WholeBlood	cg25659938	0.495761	0.4795	chr1_156503322_C_G_b38
UKB_20002_1309_self_reported_osteoporosis	region42	Ovary	cg16110541	0.544756	0.7206	chr1_68169392_T_C_b38
UKB_20002_1309_self_reported_osteoporosis	region813	Ovary	cg22795239	0.639561	0.4619	chr7_121326736_A_G_b38
UKB_20002_1313_self_reported_ankylosing_spondylitis	region655	ColonTransverse	cg25403205	0.454303	0.947	chr6_31615948_C_T_b38
UKB_20002_1313_self_reported_ankylosing_spondylitis	region655	Lung	cg25403205	0.730318	0.9581	chr6_31615948_C_T_b38
UKB_20002_1452_self_reported_eczema_or_dermatitis	region1129	ColonTransverse	cg01097872	0.5095	0.3714	chr11_65793314_G_A_b38
UKB_20002_1452_self_reported_eczema_or_dermatitis	region1129	ColonTransverse	cg03310197	0.873748	0.8869	chr11_65791795_A_G_b38
UKB_20002_1452_self_reported_eczema_or_dermatitis	region1129	ColonTransverse	cg03725042	0.94775	0.9814	chr11_65791795_A_G_b38
UKB_20002_1452_self_reported_eczema_or_dermatitis	region1129	ColonTransverse	cg04293602	0.946309	0.7364	chr11_65784486_A_G_b38
UKB_20002_1452_self_reported_eczema_or_dermatitis	region1129	ColonTransverse	cg13229961	0.509503	0.3714	chr11_65793314_G_A_b38
UKB_20002_1452_self_reported_eczema_or_dermatitis	region1129	ColonTransverse	cg14030993	0.989475	0.9814	chr11_65791795_A_G_b38
UKB_20002_1452_self_reported_eczema_or_dermatitis	region1129	ColonTransverse	cg14417377	0.577489	0.9812	chr11_65791795_A_G_b38
UKB_20002_1452_self_reported_eczema_or_dermatitis	region1129	ColonTransverse	cg19390314	0.807652	0.7488	chr11_65784486_A_G_b38
UKB_20002_1452_self_reported_eczema_or_dermatitis	region1129	ColonTransverse	cg22337491	0.97786	0.9814	chr11_65791795_A_G_b38
UKB_20002_1452_self_reported_eczema_or_dermatitis	region1129	ColonTransverse	cg23220533	0.972359	0.9823	chr11_65791795_A_G_b38
UKB_20002_1452_self_reported_eczema_or_dermatitis	region1129	ColonTransverse	cg26622952	0.989485	0.9814	chr11_65791795_A_G_b38
UKB_20002_1452_self_reported_eczema_or_dermatitis	region1129	ColonTransverse	cg26683025	0.658299	0.9804	chr11_65791795_A_G_b38
UKB_20002_1452_self_reported_eczema_or_dermatitis	region1135	ColonTransverse	cg10400081	0.568655	0.5213	chr11_76581529_A_T_b38
UKB_20002_1452_self_reported_eczema_or_dermatitis	region1375	ColonTransverse	cg19414123	0.357213	0.3072	chr14_102777952_G_A_b38
UKB_20002_1452_self_reported_eczema_or_dermatitis	region75	ColonTransverse	cg18538872	0.458628	0.4159	chr1_154435237_T_C_b38
UKB_20002_1452_self_reported_eczema_or_dermatitis	region1129	Lung	cg01097872	0.484594	0.3538	chr11_65793314_G_A_b38
UKB_20002_1452_self_reported_eczema_or_dermatitis	region1129	Lung	cg07008379	0.744287	0.5719	chr11_65784486_A_G_b38
UKB_20002_1452_self_reported_eczema_or_dermatitis	region1129	Lung	cg10518572	0.474881	0.3538	chr11_65793314_G_A_b38
UKB_20002_1452_self_reported_eczema_or_dermatitis	region1129	Lung	cg10604040	0.973839	0.9799	chr11_65791795_A_G_b38
UKB_20002_1452_self_reported_eczema_or_dermatitis	region1129	Lung	cg13229961	0.484811	0.3538	chr11_65793314_G_A_b38
UKB_20002_1452_self_reported_eczema_or_dermatitis	region1129	Lung	cg14417377	0.988408	0.9799	chr11_65791795_A_G_b38
UKB_20002_1452_self_reported_eczema_or_dermatitis	region1129	Lung	cg20026499	0.973441	0.9799	chr11_65791795_A_G_b38
UKB_20002_1452_self_reported_eczema_or_dermatitis	region1129	Lung	cg26622952	0.9843	0.9799	chr11_65791795_A_G_b38
UKB_20002_1452_self_reported_eczema_or_dermatitis	region1129	Lung	cg26683025	0.949576	0.9799	chr11_65791795_A_G_b38
UKB_20002_1452_self_reported_eczema_or_dermatitis	region654	Lung	cg00332148	0.401491	0.5758	chr6_31581779_T_G_b38
UKB_20002_1452_self_reported_eczema_or_dermatitis	region1438	MuscleSkeletal	cg19767048	0.945822	0.9017	chr16_11135732_T_C_b38
UKB_20002_1452_self_reported_eczema_or_dermatitis	region1653	MuscleSkeletal	cg24936179	0.557462	0.3782	chr20_63768288_C_T_b38
UKB_20002_1452_self_reported_eczema_or_dermatitis	region1129	Ovary	cg01097872	0.464626	0.3881	chr11_65793314_G_A_b38
UKB_20002_1452_self_reported_eczema_or_dermatitis	region1129	Ovary	cg13229961	0.533658	0.389	chr11_65793314_G_A_b38
UKB_20002_1452_self_reported_eczema_or_dermatitis	region1129	Ovary	cg14030993	0.990791	0.9827	chr11_65791795_A_G_b38
UKB_20002_1452_self_reported_eczema_or_dermatitis	region1129	Ovary	cg22337491	0.978503	0.9827	chr11_65791795_A_G_b38
UKB_20002_1452_self_reported_eczema_or_dermatitis	region1375	Ovary	cg19414123	0.372271	0.3063	chr14_102776388_C_T_b38
UKB_20002_1452_self_reported_eczema_or_dermatitis	region1438	Ovary	cg03024546	0.919195	0.899	chr16_11129597_C_G_b38
UKB_20002_1452_self_reported_eczema_or_dermatitis	region1653	Ovary	cg24936179	0.304062	0.3005	chr20_63767582_C_T_b38
UKB_20002_1452_self_reported_eczema_or_dermatitis	region75	Ovary	cg00929661	0.519632	0.3663	chr1_154434943_A_C_b38
UKB_20002_1452_self_reported_eczema_or_dermatitis	region1129	Prostate	cg10604040	0.988912	0.982	chr11_65791795_A_G_b38
UKB_20002_1452_self_reported_eczema_or_dermatitis	region1129	Prostate	cg13229961	0.46526	0.3802	chr11_65793314_G_A_b38
UKB_20002_1452_self_reported_eczema_or_dermatitis	region1129	Prostate	cg22337491	0.905259	0.982	chr11_65791795_A_G_b38
UKB_20002_1452_self_reported_eczema_or_dermatitis	region598	Prostate	cg04586395	0.460101	0.8673	chr5_132660272_A_G_b38
UKB_20002_1452_self_reported_eczema_or_dermatitis	region75	Prostate	cg13796884	0.402153	0.3384	chr1_154455807_A_G_b38
UKB_20002_1452_self_reported_eczema_or_dermatitis	region1135	Testis	cg10400081	0.768532	0.6148	chr11_76588605_C_A_b38
UKB_20002_1452_self_reported_eczema_or_dermatitis	region1129	WholeBlood	cg14030993	0.994577	0.9893	chr11_65791795_A_G_b38
UKB_20002_1452_self_reported_eczema_or_dermatitis	region1129	WholeBlood	cg22337491	0.994577	0.9893	chr11_65791795_A_G_b38
UKB_20002_1453_self_reported_psoriasis	region1173	ColonTransverse	cg06345087	0.726342	0.757	chr11_128512567_C_T_b38
UKB_20002_1453_self_reported_psoriasis	region1173	ColonTransverse	cg13448797	0.708342	0.7517	chr11_128512567_C_T_b38
UKB_20002_1453_self_reported_psoriasis	region607	ColonTransverse	cg19112952	0.540998	0.3871	chr5_151085080_A_C_b38
UKB_20002_1453_self_reported_psoriasis	region1173	Lung	cg13448797	0.352913	0.3918	chr11_128512567_C_T_b38
UKB_20002_1453_self_reported_psoriasis	region607	Ovary	cg19112952	0.678057	0.3743	chr5_151085080_A_C_b38
UKB_20002_1453_self_reported_psoriasis	region74	Ovary	cg17242116	0.365524	0.4183	chr1_152578849_C_T_b38
UKB_20002_1453_self_reported_psoriasis	region959	Prostate	cg03848588	0.440666	0.8216	chr9_32523739_T_C_b38
UKB_20002_1463_self_reported_ulcerative_colitis	region1671	BreastMammaryTissue	cg25269340	0.756889	0.6421	chr21_39091357_G_A_b38
UKB_20002_1463_self_reported_ulcerative_colitis	region105	ColonTransverse	cg16247264	0.883534	0.8619	chr1_206769068_C_T_b38
UKB_20002_1463_self_reported_ulcerative_colitis	region12	ColonTransverse	cg09550558	0.453176	0.4628	chr1_19861908_T_A_b38
UKB_20002_1463_self_reported_ulcerative_colitis	region1671	ColonTransverse	cg25269340	0.646237	0.428	chr21_39096912_G_A_b38
UKB_20002_1463_self_reported_ulcerative_colitis	region1671	Lung	cg25269340	0.604861	0.4043	chr21_39096912_G_A_b38
UKB_20002_1463_self_reported_ulcerative_colitis	region1671	MuscleSkeletal	cg25269340	0.663321	0.4729	chr21_39096912_G_A_b38
UKB_20002_1463_self_reported_ulcerative_colitis	region12	Ovary	cg18856004	0.357386	0.3357	chr1_19875796_T_C_b38
UKB_20002_1463_self_reported_ulcerative_colitis	region1671	Ovary	cg25269340	0.432033	0.3252	chr21_39096912_G_A_b38
UKB_20002_1463_self_reported_ulcerative_colitis	region1671	Prostate	cg25269340	0.657842	0.4604	chr21_39096912_G_A_b38
UKB_20002_1463_self_reported_ulcerative_colitis	region1671	Testis	cg25269340	0.688076	0.5231	chr21_39096912_G_A_b38
UKB_20002_1463_self_reported_ulcerative_colitis	region1671	WholeBlood	cg25269340	0.639963	0.414	chr21_39095717_T_C_b38
UKB_20002_1466_self_reported_gout	region562	ColonTransverse	cg01170694	0.321792	0.3969	chr5_73135655_G_C_b38
UKB_20002_1466_self_reported_gout	region1047	Ovary	cg19880462	0.802713	0.7691	chr10_59709780_T_C_b38
UKB_20002_1466_self_reported_gout	region1129	Ovary	cg15850078	0.484715	0.3648	chr11_64590067_G_A_b38
UKB_20002_1466_self_reported_gout	region1419	Ovary	cg03780875	0.500645	0.3855	chr15_90116169_A_G_b38
UKB_20002_1473_self_reported_high_cholesterol	region1628	BreastMammaryTissue	cg10663474	0.479298	0.5137	chr20_17863874_AGGCATGCTGCCAAGAAT_A_b38
UKB_20002_1473_self_reported_high_cholesterol	region66	BreastMammaryTissue	cg00908766	0.739421	0.6059	chr1_109274968_G_T_b38
UKB_20002_1473_self_reported_high_cholesterol	region144	ColonTransverse	cg00673290	0.923936	0.8738	chr2_21044589_G_A_b38
UKB_20002_1473_self_reported_high_cholesterol	region144	ColonTransverse	cg05337441	0.382847	0.915	chr2_21044589_G_A_b38
UKB_20002_1473_self_reported_high_cholesterol	region144	ColonTransverse	cg17067405	0.918508	0.8737	chr2_21044589_G_A_b38
UKB_20002_1473_self_reported_high_cholesterol	region144	ColonTransverse	cg25035485	0.616083	0.8738	chr2_21044589_G_A_b38
UKB_20002_1473_self_reported_high_cholesterol	region144	ColonTransverse	cg25071744	0.688903	0.9236	chr2_21044589_G_A_b38
UKB_20002_1473_self_reported_high_cholesterol	region1465	ColonTransverse	cg04702007	0.848327	0.5588	chr16_72106654_G_A_b38
UKB_20002_1473_self_reported_high_cholesterol	region1523	ColonTransverse	cg07010633	0.676115	0.5828	chr17_75828040_T_C_b38
UKB_20002_1473_self_reported_high_cholesterol	region1523	ColonTransverse	cg12407791	0.632563	0.5828	chr17_75828040_T_C_b38
UKB_20002_1473_self_reported_high_cholesterol	region1523	ColonTransverse	cg23470227	0.356057	0.5828	chr17_75828040_T_C_b38
UKB_20002_1473_self_reported_high_cholesterol	region1523	ColonTransverse	cg23891399	0.463626	0.5828	chr17_75828040_T_C_b38
UKB_20002_1473_self_reported_high_cholesterol	region1609	ColonTransverse	cg08873673	0.331175	0.3145	chr19_48710576_G_A_b38
UKB_20002_1473_self_reported_high_cholesterol	region1628	ColonTransverse	cg10663474	0.409887	0.4018	chr20_17863874_AGGCATGCTGCCAAGAAT_A_b38
UKB_20002_1473_self_reported_high_cholesterol	region1653	ColonTransverse	cg15300457	0.909788	0.86	chr20_64080106_C_T_b38
UKB_20002_1473_self_reported_high_cholesterol	region654	ColonTransverse	cg23533285	0.887919	0.8325	chr6_31360740_T_C_b38
UKB_20002_1473_self_reported_high_cholesterol	region655	ColonTransverse	cg14592690	0.65704	0.6588	chr6_31916180_A_G_b38
UKB_20002_1473_self_reported_high_cholesterol	region1628	KidneyCortex	cg10663474	0.922734	0.7451	chr20_17863848_G_T_b38
UKB_20002_1473_self_reported_high_cholesterol	region1004	Lung	cg24267699	0.578671	0.8379	chr9_133266456_T_C_b38
UKB_20002_1473_self_reported_high_cholesterol	region121	Lung	cg26314722	0.433374	0.3512	chr1_234728467_C_T_b38
UKB_20002_1473_self_reported_high_cholesterol	region144	Lung	cg20689167	0.92004	0.886	chr2_21044589_G_A_b38
UKB_20002_1473_self_reported_high_cholesterol	region1523	Lung	cg07010633	0.381587	0.6104	chr17_75828040_T_C_b38
UKB_20002_1473_self_reported_high_cholesterol	region1523	Lung	cg12407791	0.531549	0.6104	chr17_75828040_T_C_b38
UKB_20002_1473_self_reported_high_cholesterol	region1523	Lung	cg23470227	0.488905	0.6104	chr17_75828040_T_C_b38
UKB_20002_1473_self_reported_high_cholesterol	region1523	Lung	cg23891399	0.680714	0.6104	chr17_75828040_T_C_b38
UKB_20002_1473_self_reported_high_cholesterol	region1628	Lung	cg10663474	0.967911	0.7424	chr20_17863848_G_T_b38
UKB_20002_1473_self_reported_high_cholesterol	region1653	Lung	cg04171166	0.542096	0.42	chr20_64064671_C_T_b38
UKB_20002_1473_self_reported_high_cholesterol	region1653	Lung	cg15300457	0.926159	0.8733	chr20_64080106_C_T_b38
UKB_20002_1473_self_reported_high_cholesterol	region654	Lung	cg23533285	0.861332	0.8479	chr6_31360740_T_C_b38
UKB_20002_1473_self_reported_high_cholesterol	region66	Lung	cg00908766	0.953017	0.5989	chr1_109274968_G_T_b38
UKB_20002_1473_self_reported_high_cholesterol	region66	Lung	cg03301213	0.904847	0.5989	chr1_109274968_G_T_b38
UKB_20002_1473_self_reported_high_cholesterol	region66	Lung	cg09754932	0.938315	0.5911	chr1_109274968_G_T_b38
UKB_20002_1473_self_reported_high_cholesterol	region1628	MuscleSkeletal	cg10663474	0.918452	0.8198	chr20_17863848_G_T_b38
UKB_20002_1473_self_reported_high_cholesterol	region66	MuscleSkeletal	cg00908766	0.997209	0.8571	chr1_109274968_G_T_b38
UKB_20002_1473_self_reported_high_cholesterol	region885	MuscleSkeletal	cg20828742	0.509692	0.4262	chr8_58457761_G_A_b38
UKB_20002_1473_self_reported_high_cholesterol	region1078	Ovary	cg26380291	0.761829	0.6614	chr10_113028677_C_T_b38
UKB_20002_1473_self_reported_high_cholesterol	region144	Ovary	cg00673290	0.743877	0.8853	chr2_21044589_G_A_b38
UKB_20002_1473_self_reported_high_cholesterol	region144	Ovary	cg05337441	0.877407	0.934	chr2_21044589_G_A_b38
UKB_20002_1473_self_reported_high_cholesterol	region144	Ovary	cg17067405	0.865524	0.8853	chr2_21044589_G_A_b38
UKB_20002_1473_self_reported_high_cholesterol	region144	Ovary	cg25035485	0.944398	0.9318	chr2_21044589_G_A_b38
UKB_20002_1473_self_reported_high_cholesterol	region144	Ovary	cg25071744	0.947867	0.9434	chr2_21044589_G_A_b38
UKB_20002_1473_self_reported_high_cholesterol	region1628	Ovary	cg10663474	0.955375	0.7819	chr20_17863848_G_T_b38
UKB_20002_1473_self_reported_high_cholesterol	region1653	Ovary	cg04278197	0.656907	0.5766	chr20_64080106_C_T_b38
UKB_20002_1473_self_reported_high_cholesterol	region401	Ovary	cg04102620	0.609127	0.5727	chr4_3472024_C_T_b38
UKB_20002_1473_self_reported_high_cholesterol	region563	Ovary	cg27378540	0.317181	0.7952	chr5_75360714_T_C_b38
UKB_20002_1473_self_reported_high_cholesterol	region655	Ovary	cg14592690	0.793043	0.6614	chr6_31918153_C_T_b38
UKB_20002_1473_self_reported_high_cholesterol	region718	Ovary	cg17509516	0.646497	0.5174	chr6_135100038_C_T_b38
UKB_20002_1473_self_reported_high_cholesterol	region144	Prostate	cg00673290	0.7485	0.919	chr2_21044589_G_A_b38
UKB_20002_1473_self_reported_high_cholesterol	region144	Prostate	cg17067405	0.750854	0.919	chr2_21044589_G_A_b38
UKB_20002_1473_self_reported_high_cholesterol	region144	Prostate	cg25035485	0.960415	0.9618	chr2_21044589_G_A_b38
UKB_20002_1473_self_reported_high_cholesterol	region1585	Prostate	cg17155016	0.634753	0.5023	chr19_11081517_A_T_b38
UKB_20002_1473_self_reported_high_cholesterol	region1609	Prostate	cg08619932	0.462141	0.3249	chr19_48705608_G_A_b38
UKB_20002_1473_self_reported_high_cholesterol	region1609	Prostate	cg16867584	0.458951	0.3436	chr19_48705608_G_A_b38
UKB_20002_1473_self_reported_high_cholesterol	region1628	Prostate	cg10663474	0.941805	0.8108	chr20_17863848_G_T_b38
UKB_20002_1473_self_reported_high_cholesterol	region1653	Prostate	cg10512781	0.978879	0.9585	chr20_64060707_A_C_b38
UKB_20002_1473_self_reported_high_cholesterol	region401	Prostate	cg10195146	0.640353	0.6117	chr4_3472024_C_T_b38
UKB_20002_1473_self_reported_high_cholesterol	region445	Prostate	cg07461115	0.524264	0.467	chr4_68444195_A_G_b38
UKB_20002_1473_self_reported_high_cholesterol	region611	Prostate	cg05521497	0.487859	0.3529	chr5_156963286_T_C_b38
UKB_20002_1473_self_reported_high_cholesterol	region611	Prostate	cg13835843	0.49833	0.386	chr5_156963286_T_C_b38
UKB_20002_1473_self_reported_high_cholesterol	region611	Prostate	cg17101560	0.510373	0.435	chr5_156955297_A_G_b38
UKB_20002_1473_self_reported_high_cholesterol	region655	Prostate	cg14661811	0.616397	0.3291	chr6_31910718_A_G_b38
UKB_20002_1473_self_reported_high_cholesterol	region66	Prostate	cg00908766	0.998292	0.9597	chr1_109274968_G_T_b38
UKB_20002_1473_self_reported_high_cholesterol	region66	Prostate	cg03301213	0.998308	0.9766	chr1_109274968_G_T_b38
UKB_20002_1473_self_reported_high_cholesterol	region66	Prostate	cg17243654	0.567097	0.3689	chr1_109275908_C_T_b38
UKB_20002_1473_self_reported_high_cholesterol	region1523	WholeBlood	cg07010633	0.618633	0.6753	chr17_75828040_T_C_b38
UKB_20002_1473_self_reported_high_cholesterol	region1523	WholeBlood	cg12407791	0.602599	0.6752	chr17_75828040_T_C_b38
UKB_20002_1473_self_reported_high_cholesterol	region1523	WholeBlood	cg23470227	0.515082	0.6759	chr17_75828040_T_C_b38
UKB_20002_1473_self_reported_high_cholesterol	region1523	WholeBlood	cg23891399	0.622925	0.6758	chr17_75828040_T_C_b38
UKB_20002_1473_self_reported_high_cholesterol	region1653	WholeBlood	cg10512781	0.810904	0.3026	chr20_64064671_C_T_b38
UKB_20002_1473_self_reported_high_cholesterol	region654	WholeBlood	cg09588770	0.457645	0.3528	chr6_31357925_A_G_b38
UKB_20016_Fluid_intelligence_score	region1656	BreastMammaryTissue	cg01256391	0.783416	0.4092	chr21_17660633_G_A_b38
UKB_20016_Fluid_intelligence_score	region1656	BreastMammaryTissue	cg12019259	0.787599	0.8119	chr21_17660561_C_T_b38
UKB_20016_Fluid_intelligence_score	region228	BreastMammaryTissue	cg00599163	0.982042	0.9709	chr2_161244750_G_A_b38
UKB_20016_Fluid_intelligence_score	region228	BreastMammaryTissue	cg15237618	0.975891	0.9677	chr2_161244750_G_A_b38
UKB_20016_Fluid_intelligence_score	region228	BreastMammaryTissue	cg16506815	0.982056	0.9709	chr2_161244750_G_A_b38
UKB_20016_Fluid_intelligence_score	region228	BreastMammaryTissue	cg18049933	0.982053	0.9709	chr2_161244750_G_A_b38
UKB_20016_Fluid_intelligence_score	region228	BreastMammaryTissue	cg23987493	0.982056	0.9709	chr2_161244750_G_A_b38
UKB_20016_Fluid_intelligence_score	region228	BreastMammaryTissue	cg25487775	0.970376	0.9709	chr2_161244750_G_A_b38
UKB_20016_Fluid_intelligence_score	region1073	ColonTransverse	cg03848545	0.612409	0.68	chr10_101845957_T_C_b38
UKB_20016_Fluid_intelligence_score	region1073	ColonTransverse	cg14789214	0.700782	0.7486	chr10_101795854_C_T_b38
UKB_20016_Fluid_intelligence_score	region1656	ColonTransverse	cg01256391	0.816654	0.754	chr21_17660631_G_C_b38
UKB_20016_Fluid_intelligence_score	region1656	ColonTransverse	cg12019259	0.816732	0.7892	chr21_17660631_G_C_b38
UKB_20016_Fluid_intelligence_score	region228	ColonTransverse	cg00599163	0.984721	0.97	chr2_161244750_G_A_b38
UKB_20016_Fluid_intelligence_score	region228	ColonTransverse	cg12727138	0.966275	0.8831	chr2_161244750_G_A_b38
UKB_20016_Fluid_intelligence_score	region228	ColonTransverse	cg13854012	0.984721	0.97	chr2_161244750_G_A_b38
UKB_20016_Fluid_intelligence_score	region228	ColonTransverse	cg14879451	0.697682	0.9667	chr2_161244750_G_A_b38
UKB_20016_Fluid_intelligence_score	region228	ColonTransverse	cg15237618	0.984721	0.97	chr2_161244750_G_A_b38
UKB_20016_Fluid_intelligence_score	region228	ColonTransverse	cg18049933	0.984721	0.97	chr2_161244750_G_A_b38
UKB_20016_Fluid_intelligence_score	region228	ColonTransverse	cg21211367	0.984721	0.97	chr2_161244750_G_A_b38
UKB_20016_Fluid_intelligence_score	region228	ColonTransverse	cg23987493	0.984635	0.97	chr2_161244750_G_A_b38
UKB_20016_Fluid_intelligence_score	region228	ColonTransverse	cg25487775	0.984721	0.97	chr2_161244750_G_A_b38
UKB_20016_Fluid_intelligence_score	region555	ColonTransverse	cg00960071	0.411821	0.3902	chr5_60340163_G_A_b38
UKB_20016_Fluid_intelligence_score	region702	ColonTransverse	cg14618923	0.327997	0.3623	chr6_108575012_A_G_b38
UKB_20016_Fluid_intelligence_score	region774	ColonTransverse	cg24745803	0.400533	0.5022	chr7_44735045_G_T_b38
UKB_20016_Fluid_intelligence_score	region1208	KidneyCortex	cg08136938	0.539943	0.3436	chr12_49014657_A_T_b38
UKB_20016_Fluid_intelligence_score	region1656	KidneyCortex	cg01256391	0.691694	0.6021	chr21_17651958_C_T_b38
UKB_20016_Fluid_intelligence_score	region1656	KidneyCortex	cg12019259	0.886259	0.8082	chr21_17660561_C_T_b38
UKB_20016_Fluid_intelligence_score	region228	KidneyCortex	cg00599163	0.984767	0.9785	chr2_161244750_G_A_b38
UKB_20016_Fluid_intelligence_score	region228	KidneyCortex	cg12727138	0.965564	0.9033	chr2_161244750_G_A_b38
UKB_20016_Fluid_intelligence_score	region228	KidneyCortex	cg13854012	0.988972	0.9692	chr2_161244750_G_A_b38
UKB_20016_Fluid_intelligence_score	region228	KidneyCortex	cg15237618	0.988972	0.9784	chr2_161244750_G_A_b38
UKB_20016_Fluid_intelligence_score	region228	KidneyCortex	cg16506815	0.988972	0.9785	chr2_161244750_G_A_b38
UKB_20016_Fluid_intelligence_score	region228	KidneyCortex	cg21211367	0.988658	0.9785	chr2_161244750_G_A_b38
UKB_20016_Fluid_intelligence_score	region228	KidneyCortex	cg23987493	0.988972	0.9785	chr2_161244750_G_A_b38
UKB_20016_Fluid_intelligence_score	region228	KidneyCortex	cg25487775	0.988967	0.9785	chr2_161244750_G_A_b38
UKB_20016_Fluid_intelligence_score	region1073	Lung	cg14789214	0.369131	0.5163	chr10_101795854_C_T_b38
UKB_20016_Fluid_intelligence_score	region1656	Lung	cg01256391	0.768837	0.7548	chr21_17660631_G_C_b38
UKB_20016_Fluid_intelligence_score	region1656	Lung	cg12019259	0.807455	0.7744	chr21_17660561_C_T_b38
UKB_20016_Fluid_intelligence_score	region228	Lung	cg00599163	0.97933	0.9632	chr2_161244750_G_A_b38
UKB_20016_Fluid_intelligence_score	region228	Lung	cg12727138	0.975496	0.9484	chr2_161244750_G_A_b38
UKB_20016_Fluid_intelligence_score	region228	Lung	cg13854012	0.97933	0.9632	chr2_161244750_G_A_b38
UKB_20016_Fluid_intelligence_score	region228	Lung	cg14879451	0.625334	0.9622	chr2_161244750_G_A_b38
UKB_20016_Fluid_intelligence_score	region228	Lung	cg15237618	0.97933	0.9632	chr2_161244750_G_A_b38
UKB_20016_Fluid_intelligence_score	region228	Lung	cg16506815	0.97933	0.9632	chr2_161244750_G_A_b38
UKB_20016_Fluid_intelligence_score	region228	Lung	cg18049933	0.97933	0.9632	chr2_161244750_G_A_b38
UKB_20016_Fluid_intelligence_score	region228	Lung	cg21211367	0.97933	0.9632	chr2_161244750_G_A_b38
UKB_20016_Fluid_intelligence_score	region228	Lung	cg23987493	0.97933	0.9632	chr2_161244750_G_A_b38
UKB_20016_Fluid_intelligence_score	region228	Lung	cg25487775	0.97933	0.9632	chr2_161244750_G_A_b38
UKB_20016_Fluid_intelligence_score	region509	Lung	cg11369235	0.327138	0.4664	chr4_173096558_T_A_b38
UKB_20016_Fluid_intelligence_score	region654	Lung	cg26392102	0.418263	0.3446	chr6_31332122_T_C_b38
UKB_20016_Fluid_intelligence_score	region1656	MuscleSkeletal	cg01256391	0.599962	0.5105	chr21_17650512_G_A_b38
UKB_20016_Fluid_intelligence_score	region1656	MuscleSkeletal	cg12019259	0.904361	0.842	chr21_17660561_C_T_b38
UKB_20016_Fluid_intelligence_score	region555	MuscleSkeletal	cg11391626	0.379507	0.4795	chr5_60340163_G_A_b38
UKB_20016_Fluid_intelligence_score	region1225	Ovary	cg22223114	0.33121	0.5268	chr12_79293191_A_G_b38
UKB_20016_Fluid_intelligence_score	region1656	Ovary	cg01256391	0.805332	0.7692	chr21_17660631_G_C_b38
UKB_20016_Fluid_intelligence_score	region1656	Ovary	cg12019259	0.800787	0.6344	chr21_17660633_G_A_b38
UKB_20016_Fluid_intelligence_score	region228	Ovary	cg12520549	0.503477	0.3601	chr2_161235325_T_C_b38
UKB_20016_Fluid_intelligence_score	region228	Ovary	cg13854012	0.984087	0.9692	chr2_161244750_G_A_b38
UKB_20016_Fluid_intelligence_score	region228	Ovary	cg14879451	0.974529	0.9692	chr2_161244750_G_A_b38
UKB_20016_Fluid_intelligence_score	region228	Ovary	cg18049933	0.837535	0.9692	chr2_161244750_G_A_b38
UKB_20016_Fluid_intelligence_score	region228	Ovary	cg25487775	0.970201	0.9692	chr2_161244750_G_A_b38
UKB_20016_Fluid_intelligence_score	region1439	Prostate	cg26666580	0.901553	0.9102	chr16_12086662_G_A_b38
UKB_20016_Fluid_intelligence_score	region1656	Prostate	cg01256391	0.805887	0.7766	chr21_17660561_C_T_b38
UKB_20016_Fluid_intelligence_score	region1656	Prostate	cg12019259	0.804964	0.7769	chr21_17660561_C_T_b38
UKB_20016_Fluid_intelligence_score	region228	Prostate	cg00599163	0.975589	0.9661	chr2_161244750_G_A_b38
UKB_20016_Fluid_intelligence_score	region228	Prostate	cg12727138	0.557824	0.7048	chr2_161244750_G_A_b38
UKB_20016_Fluid_intelligence_score	region228	Prostate	cg13854012	0.919622	0.7276	chr2_161244750_G_A_b38
UKB_20016_Fluid_intelligence_score	region228	Prostate	cg14879451	0.759916	0.966	chr2_161244750_G_A_b38
UKB_20016_Fluid_intelligence_score	region228	Prostate	cg15237618	0.979673	0.9661	chr2_161244750_G_A_b38
UKB_20016_Fluid_intelligence_score	region228	Prostate	cg16506815	0.979673	0.9661	chr2_161244750_G_A_b38
UKB_20016_Fluid_intelligence_score	region228	Prostate	cg21211367	0.978493	0.9661	chr2_161244750_G_A_b38
UKB_20016_Fluid_intelligence_score	region228	Prostate	cg23987493	0.979673	0.9661	chr2_161244750_G_A_b38
UKB_20016_Fluid_intelligence_score	region228	Prostate	cg25487775	0.979641	0.9661	chr2_161244750_G_A_b38
UKB_20016_Fluid_intelligence_score	region1656	Testis	cg01256391	0.836407	0.8243	chr21_17660561_C_T_b38
UKB_20016_Fluid_intelligence_score	region1656	WholeBlood	cg01256391	0.746402	0.8241	chr21_17660631_G_C_b38
UKB_20016_Fluid_intelligence_score	region228	WholeBlood	cg00599163	0.985793	0.9753	chr2_161244750_G_A_b38
UKB_20016_Fluid_intelligence_score	region228	WholeBlood	cg13854012	0.985793	0.9747	chr2_161244750_G_A_b38
UKB_20016_Fluid_intelligence_score	region228	WholeBlood	cg15237618	0.985793	0.9753	chr2_161244750_G_A_b38
UKB_20016_Fluid_intelligence_score	region228	WholeBlood	cg16506815	0.985793	0.9753	chr2_161244750_G_A_b38
UKB_20016_Fluid_intelligence_score	region228	WholeBlood	cg18049933	0.985793	0.9753	chr2_161244750_G_A_b38
UKB_20016_Fluid_intelligence_score	region228	WholeBlood	cg23987493	0.985793	0.9753	chr2_161244750_G_A_b38
UKB_20016_Fluid_intelligence_score	region228	WholeBlood	cg25487775	0.985032	0.9753	chr2_161244750_G_A_b38
UKB_20016_Fluid_intelligence_score	region555	WholeBlood	cg06611421	0.312847	0.3628	chr5_60306513_G_A_b38
UKB_20022_Birth_weight	region1487	BreastMammaryTissue	cg03613822	0.819953	0.6895	chr17_7237287_A_G_b38
UKB_20022_Birth_weight	region1487	BreastMammaryTissue	cg13768953	0.780801	0.5133	chr17_7237287_A_G_b38
UKB_20022_Birth_weight	region311	BreastMammaryTissue	cg16404274	0.607826	0.5413	chr3_53097756_T_C_b38
UKB_20022_Birth_weight	region311	BreastMammaryTissue	cg18071195	0.515423	0.3604	chr3_53077688_T_C_b38
UKB_20022_Birth_weight	region612	BreastMammaryTissue	cg05767891	0.439255	0.3478	chr5_158389984_T_C_b38
UKB_20022_Birth_weight	region746	BreastMammaryTissue	cg24824703	0.507169	0.3745	chr7_2760887_A_G_b38
UKB_20022_Birth_weight	region874	BreastMammaryTissue	cg07977881	0.886036	0.803	chr8_38502011_C_G_b38
UKB_20022_Birth_weight	region1054	ColonTransverse	cg03922381	0.624655	0.7283	chr10_69226967_T_G_b38
UKB_20022_Birth_weight	region1054	ColonTransverse	cg11639651	0.748102	0.7417	chr10_69220168_A_T_b38
UKB_20022_Birth_weight	region1054	ColonTransverse	cg23341612	0.713214	0.74	chr10_69220168_A_T_b38
UKB_20022_Birth_weight	region1067	ColonTransverse	cg24590165	0.599439	0.4262	chr10_92711838_C_T_b38
UKB_20022_Birth_weight	region1244	ColonTransverse	cg07932199	0.428076	0.5855	chr12_111569952_C_T_b38
UKB_20022_Birth_weight	region137	ColonTransverse	cg12784422	0.621727	0.3126	chr2_9550646_T_C_b38
UKB_20022_Birth_weight	region1419	ColonTransverse	cg03209642	0.575859	0.3719	chr15_90880313_G_T_b38
UKB_20022_Birth_weight	region1419	ColonTransverse	cg05469396	0.712188	0.3585	chr15_90876202_T_TC_b38
UKB_20022_Birth_weight	region1419	ColonTransverse	cg11749141	0.426479	0.3023	chr15_90885725_C_T_b38
UKB_20022_Birth_weight	region1419	ColonTransverse	cg21472639	0.806406	0.7047	chr15_90885812_G_A_b38
UKB_20022_Birth_weight	region1419	ColonTransverse	cg22145651	0.854659	0.7779	chr15_90884967_T_C_b38
UKB_20022_Birth_weight	region1419	ColonTransverse	cg22556683	0.625454	0.617	chr15_90885406_G_A_b38
UKB_20022_Birth_weight	region1419	ColonTransverse	cg23823076	0.508663	0.4802	chr15_90884967_T_C_b38
UKB_20022_Birth_weight	region145	ColonTransverse	cg05883499	0.861245	0.4061	chr2_23664567_C_T_b38
UKB_20022_Birth_weight	region1487	ColonTransverse	cg09398951	0.579603	0.5423	chr17_7263613_T_TG_b38
UKB_20022_Birth_weight	region1487	ColonTransverse	cg18924860	0.704844	0.5652	chr17_7257205_A_C_b38
UKB_20022_Birth_weight	region1487	ColonTransverse	cg21770873	0.528344	0.4639	chr17_7254027_G_GAGAACC_b38
UKB_20022_Birth_weight	region1581	ColonTransverse	cg06635797	0.483135	0.3427	chr19_4915329_G_A_b38
UKB_20022_Birth_weight	region1649	ColonTransverse	cg20477147	0.796511	0.874	chr20_58699095_G_C_b38
UKB_20022_Birth_weight	region1697	ColonTransverse	cg01234420	0.630216	0.4806	chr22_46049122_C_G_b38
UKB_20022_Birth_weight	region1701	ColonTransverse	cg05097275	0.7656	0.724	chr22_49963202_C_T_b38
UKB_20022_Birth_weight	region311	ColonTransverse	cg18071195	0.520377	0.3087	chr3_53077688_T_C_b38
UKB_20022_Birth_weight	region311	ColonTransverse	cg22024966	0.520378	0.3087	chr3_53077688_T_C_b38
UKB_20022_Birth_weight	region311	ColonTransverse	cg23067466	0.550713	0.3921	chr3_53072031_T_C_b38
UKB_20022_Birth_weight	region351	ColonTransverse	cg16021135	0.572367	0.3523	chr3_123412407_C_T_b38
UKB_20022_Birth_weight	region372	ColonTransverse	cg24085451	0.938445	0.811	chr3_157077679_A_G_b38
UKB_20022_Birth_weight	region414	ColonTransverse	cg15092420	0.409184	0.329	chr4_17874112_TCTC_T_b38
UKB_20022_Birth_weight	region612	ColonTransverse	cg07536762	0.402343	0.3467	chr5_158375262_T_A_b38
UKB_20022_Birth_weight	region649	ColonTransverse	cg17866778	0.810498	0.6939	chr6_26233159_A_G_b38
UKB_20022_Birth_weight	region745	ColonTransverse	cg02229607	0.560656	0.5022	chr7_2719665_T_TA_b38
UKB_20022_Birth_weight	region745	ColonTransverse	cg08849294	0.643006	0.52	chr7_2719348_G_A_b38
UKB_20022_Birth_weight	region745	ColonTransverse	cg15247329	0.671278	0.4051	chr7_2724496_G_A_b38
UKB_20022_Birth_weight	region745	ColonTransverse	cg16478634	0.664029	0.4315	chr7_2722752_C_T_b38
UKB_20022_Birth_weight	region746	ColonTransverse	cg00947599	0.473098	0.3273	chr7_2763309_G_A_b38
UKB_20022_Birth_weight	region746	ColonTransverse	cg01498219	0.588163	0.3249	chr7_2756323_A_G_b38
UKB_20022_Birth_weight	region746	ColonTransverse	cg05793240	0.543295	0.324	chr7_2763309_G_A_b38
UKB_20022_Birth_weight	region746	ColonTransverse	cg19524238	0.552342	0.3163	chr7_2763309_G_A_b38
UKB_20022_Birth_weight	region746	ColonTransverse	cg23333125	0.372963	0.3346	chr7_2763309_G_A_b38
UKB_20022_Birth_weight	region762	ColonTransverse	cg08153160	0.717412	0.4505	chr7_23469121_AATTG_A_b38
UKB_20022_Birth_weight	region874	ColonTransverse	cg07977881	0.885078	0.859	chr8_38505303_G_A_b38
UKB_20022_Birth_weight	region876	ColonTransverse	cg01678292	0.695388	0.479	chr8_41665473_A_G_b38
UKB_20022_Birth_weight	region876	ColonTransverse	cg12003463	0.796135	0.6472	chr8_41661944_A_G_b38
UKB_20022_Birth_weight	region876	ColonTransverse	cg13558115	0.457796	0.6429	chr8_41679800_G_A_b38
UKB_20022_Birth_weight	region876	ColonTransverse	cg17274126	0.712073	0.4822	chr8_41665473_A_G_b38
UKB_20022_Birth_weight	region876	ColonTransverse	cg19441908	0.656832	0.3137	chr8_41670660_G_T_b38
UKB_20022_Birth_weight	region876	ColonTransverse	cg25043378	0.720702	0.4856	chr8_41665473_A_G_b38
UKB_20022_Birth_weight	region932	ColonTransverse	cg09141604	0.579451	0.3094	chr8_141314826_T_C_b38
UKB_20022_Birth_weight	region982	ColonTransverse	cg14605948	0.697219	0.7103	chr9_95462774_G_T_b38
UKB_20022_Birth_weight	region996	ColonTransverse	cg03699700	0.862855	0.8232	chr9_120869767_A_G_b38
UKB_20022_Birth_weight	region996	ColonTransverse	cg05834805	0.774624	0.8526	chr9_120871670_A_G_b38
UKB_20022_Birth_weight	region996	ColonTransverse	cg19852115	0.859118	0.8672	chr9_120869767_A_G_b38
UKB_20022_Birth_weight	region1487	KidneyCortex	cg03613822	0.548965	0.3515	chr17_7206676_A_G_b38
UKB_20022_Birth_weight	region311	KidneyCortex	cg06183256	0.451168	0.3043	chr3_53082835_C_T_b38
UKB_20022_Birth_weight	region311	KidneyCortex	cg18071195	0.614197	0.5008	chr3_53087260_A_G_b38
UKB_20022_Birth_weight	region311	KidneyCortex	cg22024966	0.614102	0.5614	chr3_53097756_T_C_b38
UKB_20022_Birth_weight	region599	KidneyCortex	cg03316495	0.663555	0.5487	chr5_134509689_A_G_b38
UKB_20022_Birth_weight	region1067	Lung	cg14689537	0.328632	0.3373	chr10_92709177_G_A_b38
UKB_20022_Birth_weight	region1074	Lung	cg06722282	0.744791	0.554	chr10_103198487_C_T_b38
UKB_20022_Birth_weight	region1322	Lung	cg09778980	0.690901	0.5099	chr14_21096700_G_A_b38
UKB_20022_Birth_weight	region1419	Lung	cg05469396	0.698636	0.3356	chr15_90876202_T_TC_b38
UKB_20022_Birth_weight	region1419	Lung	cg20992439	0.581989	0.4682	chr15_90884967_T_C_b38
UKB_20022_Birth_weight	region1487	Lung	cg04106389	0.740613	0.5743	chr17_7261244_C_T_b38
UKB_20022_Birth_weight	region1487	Lung	cg05490983	0.53777	0.5821	chr17_7261244_C_T_b38
UKB_20022_Birth_weight	region1487	Lung	cg07389922	0.546992	0.353	chr17_7251215_G_A_b38
UKB_20022_Birth_weight	region1487	Lung	cg09398951	0.521935	0.5852	chr17_7261244_C_T_b38
UKB_20022_Birth_weight	region1487	Lung	cg17265693	0.719359	0.5172	chr17_7263613_T_TG_b38
UKB_20022_Birth_weight	region1487	Lung	cg21770873	0.523322	0.4234	chr17_7254027_G_GAGAACC_b38
UKB_20022_Birth_weight	region1487	Lung	cg24944395	0.711441	0.5172	chr17_7263613_T_TG_b38
UKB_20022_Birth_weight	region1487	Lung	cg25718402	0.639905	0.5172	chr17_7263613_T_TG_b38
UKB_20022_Birth_weight	region1498	Lung	cg09088279	0.346826	0.3756	chr17_27282071_G_C_b38
UKB_20022_Birth_weight	region1581	Lung	cg06635797	0.506458	0.3864	chr19_4915329_G_A_b38
UKB_20022_Birth_weight	region1581	Lung	cg26848395	0.54504	0.3866	chr19_4915329_G_A_b38
UKB_20022_Birth_weight	region1613	Lung	cg17379037	0.848801	0.7197	chr19_54219486_A_G_b38
UKB_20022_Birth_weight	region1686	Lung	cg02404670	0.463701	0.3306	chr22_29079136_A_G_b38
UKB_20022_Birth_weight	region1701	Lung	cg01321673	0.564884	0.4013	chr22_49996190_G_C_b38
UKB_20022_Birth_weight	region1701	Lung	cg04485799	0.578772	0.4013	chr22_49996190_G_C_b38
UKB_20022_Birth_weight	region311	Lung	cg23067466	0.537313	0.4776	chr3_53087260_A_G_b38
UKB_20022_Birth_weight	region351	Lung	cg16021135	0.5269	0.3136	chr3_123411837_C_T_b38
UKB_20022_Birth_weight	region372	Lung	cg24085451	0.927297	0.8385	chr3_157077679_A_G_b38
UKB_20022_Birth_weight	region649	Lung	cg05353884	0.586116	0.7324	chr6_26233159_A_G_b38
UKB_20022_Birth_weight	region728	Lung	cg00601836	0.471203	0.3799	chr6_151723737_A_T_b38
UKB_20022_Birth_weight	region728	Lung	cg15390122	0.626523	0.4611	chr6_151718829_T_C_b38
UKB_20022_Birth_weight	region728	Lung	cg15626350	0.603282	0.4504	chr6_151719156_T_C_b38
UKB_20022_Birth_weight	region745	Lung	cg15247329	0.601302	0.3811	chr7_2724496_G_A_b38
UKB_20022_Birth_weight	region745	Lung	cg19324978	0.606152	0.4075	chr7_2719348_G_A_b38
UKB_20022_Birth_weight	region746	Lung	cg03459839	0.367421	0.3044	chr7_2763309_G_A_b38
UKB_20022_Birth_weight	region746	Lung	cg12102607	0.462947	0.3363	chr7_2763309_G_A_b38
UKB_20022_Birth_weight	region746	Lung	cg12444411	0.337993	0.3627	chr7_2763876_C_T_b38
UKB_20022_Birth_weight	region746	Lung	cg16478634	0.368906	0.3477	chr7_2761908_G_A_b38
UKB_20022_Birth_weight	region746	Lung	cg19524238	0.51619	0.3067	chr7_2763309_G_A_b38
UKB_20022_Birth_weight	region746	Lung	cg23285459	0.365423	0.3627	chr7_2763876_C_T_b38
UKB_20022_Birth_weight	region746	Lung	cg24824703	0.453865	0.4309	chr7_2761908_G_A_b38
UKB_20022_Birth_weight	region761	Lung	cg17912203	0.54279	0.7869	chr7_22662017_G_A_b38
UKB_20022_Birth_weight	region762	Lung	cg08153160	0.921574	0.935	chr7_23469121_AATTG_A_b38
UKB_20022_Birth_weight	region876	Lung	cg01678292	0.641789	0.4551	chr8_41665473_A_G_b38
UKB_20022_Birth_weight	region876	Lung	cg11479568	0.665442	0.4163	chr8_41666227_G_A_b38
UKB_20022_Birth_weight	region876	Lung	cg17274126	0.664183	0.4561	chr8_41665473_A_G_b38
UKB_20022_Birth_weight	region876	Lung	cg19441908	0.524238	0.633	chr8_41661944_A_G_b38
UKB_20022_Birth_weight	region876	Lung	cg19993819	0.59647	0.5807	chr8_41665473_A_G_b38
UKB_20022_Birth_weight	region876	Lung	cg25043378	0.640498	0.4423	chr8_41665473_A_G_b38
UKB_20022_Birth_weight	region932	Lung	cg02224142	0.780143	0.6924	chr8_141330764_G_A_b38
UKB_20022_Birth_weight	region932	Lung	cg11960359	0.695938	0.7284	chr8_141330764_G_A_b38
UKB_20022_Birth_weight	region982	Lung	cg03309252	0.454178	0.7061	chr9_95462774_G_T_b38
UKB_20022_Birth_weight	region982	Lung	cg13456470	0.857271	0.7367	chr9_95462774_G_T_b38
UKB_20022_Birth_weight	region982	Lung	cg16581009	0.746571	0.7381	chr9_95462774_G_T_b38
UKB_20022_Birth_weight	region982	Lung	cg26878949	0.645579	0.7655	chr9_95462774_G_T_b38
UKB_20022_Birth_weight	region996	Lung	cg05834805	0.480113	0.8081	chr9_120870551_G_C_b38
UKB_20022_Birth_weight	region996	Lung	cg19852115	0.892897	0.8518	chr9_120869767_A_G_b38
UKB_20022_Birth_weight	region1373	MuscleSkeletal	cg02032125	0.642181	0.9772	chr14_100728002_T_C_b38
UKB_20022_Birth_weight	region1419	MuscleSkeletal	cg05469396	0.65009	0.4745	chr15_90873320_C_A_b38
UKB_20022_Birth_weight	region1487	MuscleSkeletal	cg25256661	0.538974	0.3196	chr17_7254027_G_GAGAACC_b38
UKB_20022_Birth_weight	region1649	MuscleSkeletal	cg07624353	0.390269	0.368	chr20_58708841_T_C_b38
UKB_20022_Birth_weight	region311	MuscleSkeletal	cg02395479	0.582724	0.5028	chr3_53073553_G_A_b38
UKB_20022_Birth_weight	region311	MuscleSkeletal	cg18071195	0.611576	0.4692	chr3_53072031_T_C_b38
UKB_20022_Birth_weight	region311	MuscleSkeletal	cg22024966	0.611579	0.5365	chr3_53072031_T_C_b38
UKB_20022_Birth_weight	region372	MuscleSkeletal	cg24085451	0.849222	0.7325	chr3_157079436_T_C_b38
UKB_20022_Birth_weight	region612	MuscleSkeletal	cg05767891	0.555225	0.3424	chr5_158387220_T_C_b38
UKB_20022_Birth_weight	region746	MuscleSkeletal	cg03459839	0.3862	0.3593	chr7_2763309_G_A_b38
UKB_20022_Birth_weight	region746	MuscleSkeletal	cg12102607	0.340457	0.3629	chr7_2763309_G_A_b38
UKB_20022_Birth_weight	region746	MuscleSkeletal	cg19524238	0.512016	0.3573	chr7_2763309_G_A_b38
UKB_20022_Birth_weight	region746	MuscleSkeletal	cg20884522	0.427784	0.3605	chr7_2763309_G_A_b38
UKB_20022_Birth_weight	region819	MuscleSkeletal	cg06783429	0.741275	0.5915	chr7_128020710_T_C_b38
UKB_20022_Birth_weight	region874	MuscleSkeletal	cg07977881	0.880861	0.8374	chr8_38502011_C_G_b38
UKB_20022_Birth_weight	region1054	Ovary	cg05532178	0.680314	0.495	chr10_69216160_C_T_b38
UKB_20022_Birth_weight	region1054	Ovary	cg11762346	0.781231	0.6605	chr10_69216160_C_T_b38
UKB_20022_Birth_weight	region1054	Ovary	cg12682133	0.662117	0.5686	chr10_69216160_C_T_b38
UKB_20022_Birth_weight	region1067	Ovary	cg17928459	0.458225	0.3294	chr10_92704550_G_T_b38
UKB_20022_Birth_weight	region1206	Ovary	cg00808740	0.70599	0.5363	chr12_46405117_G_A_b38
UKB_20022_Birth_weight	region1322	Ovary	cg09778980	0.383025	0.547	chr14_21096700_G_A_b38
UKB_20022_Birth_weight	region137	Ovary	cg12784422	0.564101	0.3311	chr2_9502827_C_T_b38
UKB_20022_Birth_weight	region1419	Ovary	cg05469396	0.747038	0.3649	chr15_90876202_T_TC_b38
UKB_20022_Birth_weight	region1487	Ovary	cg03186999	0.542432	0.3726	chr17_7263613_T_TG_b38
UKB_20022_Birth_weight	region1487	Ovary	cg05279172	0.603946	0.318	chr17_7213534_C_A_b38
UKB_20022_Birth_weight	region1581	Ovary	cg03584056	0.454561	0.3296	chr19_4911784_C_T_b38
UKB_20022_Birth_weight	region1581	Ovary	cg26848395	0.646567	0.4194	chr19_4915329_G_A_b38
UKB_20022_Birth_weight	region1686	Ovary	cg02288859	0.347181	0.3576	chr22_29078089_A_G_b38
UKB_20022_Birth_weight	region1701	Ovary	cg01548456	0.614839	0.7765	chr22_49958329_G_A_b38
UKB_20022_Birth_weight	region311	Ovary	cg02395479	0.314922	0.3079	chr3_53077688_T_C_b38
UKB_20022_Birth_weight	region311	Ovary	cg18071195	0.546276	0.3163	chr3_53077688_T_C_b38
UKB_20022_Birth_weight	region311	Ovary	cg22024966	0.546276	0.3163	chr3_53077688_T_C_b38
UKB_20022_Birth_weight	region372	Ovary	cg24085451	0.819887	0.6953	chr3_157079436_T_C_b38
UKB_20022_Birth_weight	region372	Ovary	cg26658816	0.633875	0.3894	chr3_157077736_A_G_b38
UKB_20022_Birth_weight	region491	Ovary	cg15319311	0.551099	0.4	chr4_144639752_C_A_b38
UKB_20022_Birth_weight	region612	Ovary	cg05767891	0.568914	0.3301	chr5_158397175_T_C_b38
UKB_20022_Birth_weight	region745	Ovary	cg00932250	0.513099	0.5997	chr7_2719839_T_C_b38
UKB_20022_Birth_weight	region745	Ovary	cg01098939	0.580153	0.6445	chr7_2721301_T_C_b38
UKB_20022_Birth_weight	region745	Ovary	cg02230373	0.533347	0.6169	chr7_2721301_T_C_b38
UKB_20022_Birth_weight	region745	Ovary	cg06951352	0.540232	0.584	chr7_2721301_T_C_b38
UKB_20022_Birth_weight	region745	Ovary	cg12150100	0.743854	0.6324	chr7_2721301_T_C_b38
UKB_20022_Birth_weight	region745	Ovary	cg15847926	0.687249	0.5534	chr7_2718675_A_G_b38
UKB_20022_Birth_weight	region745	Ovary	cg18370025	0.678857	0.6667	chr7_2719839_T_C_b38
UKB_20022_Birth_weight	region745	Ovary	cg22124564	0.628916	0.5478	chr7_2719665_T_TA_b38
UKB_20022_Birth_weight	region746	Ovary	cg00947599	0.452853	0.3241	chr7_2763309_G_A_b38
UKB_20022_Birth_weight	region746	Ovary	cg05793240	0.35632	0.3331	chr7_2763309_G_A_b38
UKB_20022_Birth_weight	region746	Ovary	cg06544239	0.528169	0.5026	chr7_2743704_C_T_b38
UKB_20022_Birth_weight	region746	Ovary	cg08799766	0.517244	0.3472	chr7_2771112_G_A_b38
UKB_20022_Birth_weight	region746	Ovary	cg12102607	0.535753	0.3364	chr7_2763309_G_A_b38
UKB_20022_Birth_weight	region746	Ovary	cg12444411	0.324109	0.4984	chr7_2762888_T_C_b38
UKB_20022_Birth_weight	region746	Ovary	cg14895029	0.400477	0.4086	chr7_2732797_A_C_b38
UKB_20022_Birth_weight	region746	Ovary	cg20884522	0.443374	0.3233	chr7_2763309_G_A_b38
UKB_20022_Birth_weight	region746	Ovary	cg24524634	0.549106	0.3728	chr7_2756248_T_G_b38
UKB_20022_Birth_weight	region746	Ovary	cg24824703	0.556041	0.3445	chr7_2763309_G_A_b38
UKB_20022_Birth_weight	region746	Ovary	cg25700789	0.516794	0.3364	chr7_2763309_G_A_b38
UKB_20022_Birth_weight	region762	Ovary	cg08153160	0.931921	0.9428	chr7_23469121_AATTG_A_b38
UKB_20022_Birth_weight	region874	Ovary	cg07977881	0.888289	0.7774	chr8_38502140_C_T_b38
UKB_20022_Birth_weight	region874	Ovary	cg18255581	0.787464	0.8747	chr8_38508731_C_T_b38
UKB_20022_Birth_weight	region876	Ovary	cg01678292	0.735343	0.4906	chr8_41665473_A_G_b38
UKB_20022_Birth_weight	region876	Ovary	cg17274126	0.726886	0.4092	chr8_41666227_G_A_b38
UKB_20022_Birth_weight	region876	Ovary	cg25043378	0.738583	0.5342	chr8_41665473_A_G_b38
UKB_20022_Birth_weight	region932	Ovary	cg06232315	0.696278	0.6884	chr8_141332583_T_G_b38
UKB_20022_Birth_weight	region996	Ovary	cg03699700	0.573008	0.3726	chr9_120855951_A_G_b38
UKB_20022_Birth_weight	region996	Ovary	cg04000075	0.478902	0.8247	chr9_120870551_G_C_b38
UKB_20022_Birth_weight	region996	Ovary	cg14255062	0.535502	0.499	chr9_120765243_T_C_b38
UKB_20022_Birth_weight	region996	Ovary	cg19852115	0.895747	0.8706	chr9_120869767_A_G_b38
UKB_20022_Birth_weight	region1067	Prostate	cg24590165	0.571162	0.309	chr10_92719350_A_G_b38
UKB_20022_Birth_weight	region1079	Prostate	cg25236139	0.901578	0.8136	chr10_114039136_A_G_b38
UKB_20022_Birth_weight	region1085	Prostate	cg18383835	0.508789	0.3595	chr10_122416936_G_A_b38
UKB_20022_Birth_weight	region1419	Prostate	cg05469396	0.781213	0.7076	chr15_90885060_C_T_b38
UKB_20022_Birth_weight	region1419	Prostate	cg07718650	0.72481	0.5991	chr15_90885812_G_A_b38
UKB_20022_Birth_weight	region1419	Prostate	cg24350568	0.813862	0.4996	chr15_90884642_G_C_b38
UKB_20022_Birth_weight	region145	Prostate	cg05883499	0.782072	0.4266	chr2_23664567_C_T_b38
UKB_20022_Birth_weight	region1487	Prostate	cg24944395	0.463252	0.4318	chr17_7254027_G_GAGAACC_b38
UKB_20022_Birth_weight	region311	Prostate	cg18071195	0.637738	0.5081	chr3_53093661_G_T_b38
UKB_20022_Birth_weight	region311	Prostate	cg22024966	0.594536	0.5492	chr3_53097756_T_C_b38
UKB_20022_Birth_weight	region372	Prostate	cg24085451	0.935523	0.8659	chr3_157077679_A_G_b38
UKB_20022_Birth_weight	region372	Prostate	cg26658816	0.819884	0.7335	chr3_157079436_T_C_b38
UKB_20022_Birth_weight	region414	Prostate	cg13111374	0.586352	0.3557	chr4_17996803_C_A_b38
UKB_20022_Birth_weight	region746	Prostate	cg05793240	0.576368	0.4066	chr7_2763876_C_T_b38
UKB_20022_Birth_weight	region746	Prostate	cg12102607	0.424996	0.4066	chr7_2763876_C_T_b38
UKB_20022_Birth_weight	region746	Prostate	cg20884522	0.534965	0.4066	chr7_2763876_C_T_b38
UKB_20022_Birth_weight	region746	Prostate	cg23333125	0.556243	0.3721	chr7_2763876_C_T_b38
UKB_20022_Birth_weight	region746	Prostate	cg24824703	0.313257	0.4605	chr7_2761908_G_A_b38
UKB_20022_Birth_weight	region746	Prostate	cg25318189	0.440445	0.3883	chr7_2763876_C_T_b38
UKB_20022_Birth_weight	region761	Prostate	cg17912203	0.731831	0.8051	chr7_22662017_G_A_b38
UKB_20022_Birth_weight	region761	Prostate	cg23521230	0.348804	0.456	chr7_22666104_T_C_b38
UKB_20022_Birth_weight	region874	Prostate	cg07977881	0.852975	0.7761	chr8_38503861_C_T_b38
UKB_20022_Birth_weight	region876	Prostate	cg01678292	0.585183	0.4204	chr8_41666227_G_A_b38
UKB_20022_Birth_weight	region876	Prostate	cg25043378	0.704916	0.5032	chr8_41665840_A_G_b38
UKB_20022_Birth_weight	region982	Prostate	cg13456470	0.620741	0.6946	chr9_95455066_A_G_b38
UKB_20022_Birth_weight	region982	Prostate	cg14721171	0.521094	0.7724	chr9_95462774_G_T_b38
UKB_20022_Birth_weight	region1074	Testis	cg00035347	0.626411	0.815	chr10_103184236_G_A_b38
UKB_20022_Birth_weight	region1195	Testis	cg09640070	0.904407	0.8892	chr12_26722632_G_A_b38
UKB_20022_Birth_weight	region311	Testis	cg02395479	0.488409	0.4219	chr3_53082835_C_T_b38
UKB_20022_Birth_weight	region311	Testis	cg16404274	0.572543	0.5572	chr3_53097756_T_C_b38
UKB_20022_Birth_weight	region311	Testis	cg18071195	0.547957	0.3547	chr3_53069139_C_T_b38
UKB_20022_Birth_weight	region311	Testis	cg22024966	0.568549	0.5027	chr3_53072031_T_C_b38
UKB_20022_Birth_weight	region311	Testis	cg25751261	0.543617	0.3208	chr3_53082835_C_T_b38
UKB_20022_Birth_weight	region1487	WholeBlood	cg03613822	0.739816	0.6641	chr17_7237287_A_G_b38
UKB_20022_Birth_weight	region311	WholeBlood	cg18071195	0.553239	0.4738	chr3_53087260_A_G_b38
UKB_20022_Birth_weight	region745	WholeBlood	cg15247329	0.616239	0.3616	chr7_2724496_G_A_b38
UKB_20022_Birth_weight	region745	WholeBlood	cg16478634	0.616239	0.5366	chr7_2722752_C_T_b38
UKB_20022_Birth_weight	region746	WholeBlood	cg20884522	0.364925	0.3603	chr7_2756248_T_G_b38
UKB_20022_Birth_weight	region746	WholeBlood	cg23333125	0.334747	0.4066	chr7_2759097_A_G_b38
UKB_20022_Birth_weight	region874	WholeBlood	cg07977881	0.831939	0.5218	chr8_38503861_C_T_b38
UKB_20022_Birth_weight	region982	WholeBlood	cg13456470	0.69677	0.4215	chr9_95503619_A_G_b38
UKB_20127_Neuroticism_score	region1504	BreastMammaryTissue	cg17401724	0.485243	0.6072	chr17_40057566_C_G_b38
UKB_20127_Neuroticism_score	region514	BreastMammaryTissue	cg24368880	0.771878	0.7208	chr4_182245827_G_T_b38
UKB_20127_Neuroticism_score	region1480	ColonTransverse	cg04072301	0.409503	0.3372	chr16_88908452_A_G_b38
UKB_20127_Neuroticism_score	region1480	ColonTransverse	cg08969312	0.386498	0.4171	chr16_88903632_T_C_b38
UKB_20127_Neuroticism_score	region1504	ColonTransverse	cg17401724	0.543476	0.3449	chr17_40058022_A_C_b38
UKB_20127_Neuroticism_score	region1527	ColonTransverse	cg20441606	0.655911	0.6469	chr17_81108281_A_G_b38
UKB_20127_Neuroticism_score	region1527	ColonTransverse	cg26109145	0.533924	0.3022	chr17_81072843_G_A_b38
UKB_20127_Neuroticism_score	region301	ColonTransverse	cg12776605	0.619143	0.7032	chr3_35642443_T_G_b38
UKB_20127_Neuroticism_score	region348	ColonTransverse	cg04328677	0.330089	0.3523	chr3_117278830_C_A_b38
UKB_20127_Neuroticism_score	region514	ColonTransverse	cg04799018	0.764213	0.6896	chr4_182245827_G_T_b38
UKB_20127_Neuroticism_score	region514	ColonTransverse	cg24368880	0.764213	0.6913	chr4_182245827_G_T_b38
UKB_20127_Neuroticism_score	region655	ColonTransverse	cg03543593	0.90859	0.9736	chr6_32108722_G_A_b38
UKB_20127_Neuroticism_score	region655	ColonTransverse	cg03611618	0.89017	0.9556	chr6_32108722_G_A_b38
UKB_20127_Neuroticism_score	region655	ColonTransverse	cg19108771	0.401374	0.9736	chr6_32108722_G_A_b38
UKB_20127_Neuroticism_score	region655	ColonTransverse	cg21448535	0.596141	0.9736	chr6_32108722_G_A_b38
UKB_20127_Neuroticism_score	region745	ColonTransverse	cg02825527	0.33661	0.4386	chr7_2047680_G_A_b38
UKB_20127_Neuroticism_score	region745	ColonTransverse	cg03006193	0.455072	0.6547	chr7_2039346_C_T_b38
UKB_20127_Neuroticism_score	region1355	KidneyCortex	cg20382622	0.517226	0.3353	chr14_74811478_A_C_b38
UKB_20127_Neuroticism_score	region1355	KidneyCortex	cg21112954	0.401865	0.3153	chr14_74811478_A_C_b38
UKB_20127_Neuroticism_score	region514	KidneyCortex	cg04799018	0.738828	0.5584	chr4_182245827_G_T_b38
UKB_20127_Neuroticism_score	region514	KidneyCortex	cg24368880	0.738818	0.6496	chr4_182245827_G_T_b38
UKB_20127_Neuroticism_score	region655	KidneyCortex	cg03543593	0.986318	0.9636	chr6_32108722_G_A_b38
UKB_20127_Neuroticism_score	region745	KidneyCortex	cg02383674	0.604068	0.5582	chr7_2047680_G_A_b38
UKB_20127_Neuroticism_score	region838	KidneyCortex	cg27127927	0.456066	0.433	chr7_155294894_T_A_b38
UKB_20127_Neuroticism_score	region1504	Lung	cg17401724	0.372635	0.4075	chr17_40057566_C_G_b38
UKB_20127_Neuroticism_score	region514	Lung	cg24368880	0.733005	0.6886	chr4_182245827_G_T_b38
UKB_20127_Neuroticism_score	region744	Lung	cg08962362	0.327886	0.4459	chr7_1993168_C_T_b38
UKB_20127_Neuroticism_score	region745	Lung	cg02383674	0.398635	0.4048	chr7_2047680_G_A_b38
UKB_20127_Neuroticism_score	region745	Lung	cg02825527	0.360127	0.4069	chr7_2047680_G_A_b38
UKB_20127_Neuroticism_score	region848	Lung	cg23818621	0.300508	0.3186	chr8_5080235_C_G_b38
UKB_20127_Neuroticism_score	region884	Lung	cg23739762	0.672635	0.5726	chr8_57575440_G_A_b38
UKB_20127_Neuroticism_score	region982	Lung	cg13456470	0.365097	0.3131	chr9_95462774_G_T_b38
UKB_20127_Neuroticism_score	region1480	MuscleSkeletal	cg04072301	0.378534	0.3753	chr16_88910069_T_C_b38
UKB_20127_Neuroticism_score	region1504	MuscleSkeletal	cg20935841	0.317593	0.3022	chr17_40049839_T_C_b38
UKB_20127_Neuroticism_score	region514	MuscleSkeletal	cg24368880	0.521627	0.5858	chr4_182245827_G_T_b38
UKB_20127_Neuroticism_score	region1504	Ovary	cg17401724	0.505907	0.4078	chr17_40057566_C_G_b38
UKB_20127_Neuroticism_score	region1527	Ovary	cg23532322	0.355887	0.4279	chr17_81104810_A_G_b38
UKB_20127_Neuroticism_score	region1549	Ovary	cg00032391	0.313507	0.494	chr18_37575947_C_T_b38
UKB_20127_Neuroticism_score	region640	Ovary	cg11918799	0.417874	0.4938	chr6_11996817_A_G_b38
UKB_20127_Neuroticism_score	region640	Ovary	cg11963105	0.549816	0.4462	chr6_11988583_C_G_b38
UKB_20127_Neuroticism_score	region640	Ovary	cg23969922	0.589389	0.5247	chr6_11996817_A_G_b38
UKB_20127_Neuroticism_score	region745	Ovary	cg02383674	0.454993	0.4163	chr7_2048188_T_C_b38
UKB_20127_Neuroticism_score	region745	Ovary	cg02825527	0.441372	0.4458	chr7_2048188_T_C_b38
UKB_20127_Neuroticism_score	region745	Ovary	cg03006193	0.472373	0.6261	chr7_2039346_C_T_b38
UKB_20127_Neuroticism_score	region745	Ovary	cg06100570	0.692248	0.6234	chr7_2039346_C_T_b38
UKB_20127_Neuroticism_score	region855	Ovary	cg21557098	0.483402	0.49	chr8_11587007_G_A_b38
UKB_20127_Neuroticism_score	region1504	Prostate	cg17401724	0.612906	0.4007	chr17_40058022_A_C_b38
UKB_20127_Neuroticism_score	region1527	Prostate	cg14948086	0.324137	0.3332	chr17_81071973_A_G_b38
UKB_20127_Neuroticism_score	region1693	Prostate	cg16838132	0.346371	0.4098	chr22_39517277_T_G_b38
UKB_20127_Neuroticism_score	region514	Prostate	cg04799018	0.52793	0.4471	chr4_182245827_G_T_b38
UKB_20127_Neuroticism_score	region514	Prostate	cg24368880	0.493442	0.3394	chr4_182246383_A_C_b38
UKB_20127_Neuroticism_score	region655	Prostate	cg21448535	0.832032	0.9796	chr6_32108722_G_A_b38
UKB_20127_Neuroticism_score	region745	Prostate	cg02383674	0.615534	0.5477	chr7_2041371_GGCTGGGGAAGGGGAGCAGGA_G_b38
UKB_20127_Neuroticism_score	region745	Prostate	cg03006193	0.550672	0.7122	chr7_2039346_C_T_b38
UKB_20127_Neuroticism_score	region745	Prostate	cg06100570	0.346075	0.5351	chr7_2041371_GGCTGGGGAAGGGGAGCAGGA_G_b38
UKB_20127_Neuroticism_score	region745	Prostate	cg15914316	0.52663	0.5056	chr7_2041371_GGCTGGGGAAGGGGAGCAGGA_G_b38
UKB_20127_Neuroticism_score	region884	Prostate	cg23739762	0.612843	0.6661	chr8_57575440_G_A_b38
UKB_20127_Neuroticism_score	region1527	WholeBlood	cg14851204	0.396907	0.3258	chr17_81071973_A_G_b38
UKB_20127_Neuroticism_score	region1527	WholeBlood	cg26109145	0.646489	0.3426	chr17_81071973_A_G_b38
UKB_20127_Neuroticism_score	region838	WholeBlood	cg27127927	0.589093	0.4819	chr7_155294792_A_G_b38
UKB_20127_Neuroticism_score	region884	WholeBlood	cg23739762	0.528152	0.6043	chr8_57575440_G_A_b38
UKB_20127_Neuroticism_score	region982	WholeBlood	cg13456470	0.312254	0.3577	chr9_95503619_A_G_b38
UKB_21001_Body_mass_index_BMI	region103	BreastMammaryTissue	cg07346359	0.392044	0.4995	chr1_203520359_C_CTCTAATGTTTTT_b38
UKB_21001_Body_mass_index_BMI	region1415	BreastMammaryTissue	cg03950166	0.815263	0.7901	chr15_80696259_G_A_b38
UKB_21001_Body_mass_index_BMI	region147	BreastMammaryTissue	cg09153930	0.358423	0.3481	chr2_26730714_T_G_b38
UKB_21001_Body_mass_index_BMI	region581	BreastMammaryTissue	cg24224080	0.433632	0.4604	chr5_106415801_A_G_b38
UKB_21001_Body_mass_index_BMI	region103	ColonTransverse	cg07346359	0.417641	0.3563	chr1_203520555_C_T_b38
UKB_21001_Body_mass_index_BMI	region103	ColonTransverse	cg19823512	0.417641	0.3563	chr1_203520555_C_T_b38
UKB_21001_Body_mass_index_BMI	region1042	ColonTransverse	cg16585183	0.392929	0.5384	chr10_51914830_T_A_b38
UKB_21001_Body_mass_index_BMI	region1063	ColonTransverse	cg23618091	0.343977	0.3057	chr10_86359258_A_G_b38
UKB_21001_Body_mass_index_BMI	region1091	ColonTransverse	cg05652533	0.371215	0.3011	chr10_132187458_G_A_b38
UKB_21001_Body_mass_index_BMI	region1091	ColonTransverse	cg08204808	0.413597	0.3347	chr10_132193504_C_A_b38
UKB_21001_Body_mass_index_BMI	region1094	ColonTransverse	cg15955074	0.596625	0.5373	chr11_840363_C_T_b38
UKB_21001_Body_mass_index_BMI	region1103	ColonTransverse	cg09783949	0.499865	0.4153	chr11_13324747_T_C_b38
UKB_21001_Body_mass_index_BMI	region1129	ColonTransverse	cg00576331	0.66209	0.6	chr11_65874460_T_A_b38
UKB_21001_Body_mass_index_BMI	region1129	ColonTransverse	cg22178971	0.640792	0.612	chr11_65874460_T_A_b38
UKB_21001_Body_mass_index_BMI	region1162	ColonTransverse	cg22994024	0.763238	0.7164	chr11_115174130_C_A_b38
UKB_21001_Body_mass_index_BMI	region1212	ColonTransverse	cg06543683	0.447101	0.4193	chr12_56100038_A_C_b38
UKB_21001_Body_mass_index_BMI	region1231	ColonTransverse	cg05403689	0.418172	0.3101	chr12_89354806_AGGG_A_b38
UKB_21001_Body_mass_index_BMI	region1231	ColonTransverse	cg05589489	0.433517	0.3101	chr12_89354806_AGGG_A_b38
UKB_21001_Body_mass_index_BMI	region1231	ColonTransverse	cg08802841	0.435204	0.31	chr12_89354806_AGGG_A_b38
UKB_21001_Body_mass_index_BMI	region1231	ColonTransverse	cg12414174	0.442683	0.3101	chr12_89354806_AGGG_A_b38
UKB_21001_Body_mass_index_BMI	region1231	ColonTransverse	cg15296664	0.421758	0.3101	chr12_89354806_AGGG_A_b38
UKB_21001_Body_mass_index_BMI	region1268	ColonTransverse	cg09469986	0.578091	0.4065	chr13_30438767_C_T_b38
UKB_21001_Body_mass_index_BMI	region128	ColonTransverse	cg12298890	0.379817	0.317	chr1_243420597_T_G_b38
UKB_21001_Body_mass_index_BMI	region1406	ColonTransverse	cg26665444	0.366328	0.3419	chr15_63501039_T_G_b38
UKB_21001_Body_mass_index_BMI	region1415	ColonTransverse	cg03950166	0.831687	0.8076	chr15_80696831_C_T_b38
UKB_21001_Body_mass_index_BMI	region1430	ColonTransverse	cg21863351	0.478977	0.4168	chr16_3641654_G_C_b38
UKB_21001_Body_mass_index_BMI	region1431	ColonTransverse	cg01971227	0.774116	0.8888	chr16_3965728_C_T_b38
UKB_21001_Body_mass_index_BMI	region1466	ColonTransverse	cg00430542	0.623986	0.5351	chr16_73063130_G_A_b38
UKB_21001_Body_mass_index_BMI	region1466	ColonTransverse	cg00808086	0.653287	0.543	chr16_73063130_G_A_b38
UKB_21001_Body_mass_index_BMI	region1466	ColonTransverse	cg08144675	0.715985	0.4911	chr16_73063130_G_A_b38
UKB_21001_Body_mass_index_BMI	region1466	ColonTransverse	cg27359566	0.649374	0.7232	chr16_73063130_G_A_b38
UKB_21001_Body_mass_index_BMI	region146	ColonTransverse	cg01884057	0.405213	0.3521	chr2_24927247_C_A_b38
UKB_21001_Body_mass_index_BMI	region1497	ColonTransverse	cg21806832	0.525771	0.4556	chr17_21364229_A_G_b38
UKB_21001_Body_mass_index_BMI	region1497	ColonTransverse	cg22398618	0.309082	0.4317	chr17_21364229_A_G_b38
UKB_21001_Body_mass_index_BMI	region1507	ColonTransverse	cg16988970	0.818044	0.6797	chr17_44203914_G_T_b38
UKB_21001_Body_mass_index_BMI	region1507	ColonTransverse	cg22998028	0.819711	0.8414	chr17_44203914_G_T_b38
UKB_21001_Body_mass_index_BMI	region1578	ColonTransverse	cg10653504	0.4006	0.4018	chr19_1856555_C_G_b38
UKB_21001_Body_mass_index_BMI	region1591	ColonTransverse	cg07695981	0.332647	0.3821	chr19_18714060_A_G_b38
UKB_21001_Body_mass_index_BMI	region1600	ColonTransverse	cg03257387	0.400682	0.3897	chr19_33813998_C_G_b38
UKB_21001_Body_mass_index_BMI	region1600	ColonTransverse	cg21113603	0.362074	0.4056	chr19_33819129_G_A_b38
UKB_21001_Body_mass_index_BMI	region1608	ColonTransverse	cg16082401	0.704294	0.6278	chr19_45678134_G_C_b38
UKB_21001_Body_mass_index_BMI	region1608	ColonTransverse	cg17144108	0.6876	0.666	chr19_45678134_G_C_b38
UKB_21001_Body_mass_index_BMI	region1608	ColonTransverse	cg17351154	0.772453	0.8074	chr19_45679046_T_A_b38
UKB_21001_Body_mass_index_BMI	region1608	ColonTransverse	cg18735402	0.682914	0.6586	chr19_45678134_G_C_b38
UKB_21001_Body_mass_index_BMI	region1608	ColonTransverse	cg19822309	0.778269	0.8074	chr19_45679046_T_A_b38
UKB_21001_Body_mass_index_BMI	region1608	ColonTransverse	cg20434926	0.490611	0.6279	chr19_45678134_G_C_b38
UKB_21001_Body_mass_index_BMI	region1644	ColonTransverse	cg17499682	0.331	0.3928	chr20_46284005_C_T_b38
UKB_21001_Body_mass_index_BMI	region19	ColonTransverse	cg07288476	0.517431	0.351	chr1_31722117_T_TG_b38
UKB_21001_Body_mass_index_BMI	region1	ColonTransverse	cg17455297	0.76112	0.724	chr1_2806649_C_A_b38
UKB_21001_Body_mass_index_BMI	region379	ColonTransverse	cg24796450	0.389394	0.3177	chr3_170998041_G_A_b38
UKB_21001_Body_mass_index_BMI	region381	ColonTransverse	cg13519184	0.757925	0.6636	chr3_173396515_A_G_b38
UKB_21001_Body_mass_index_BMI	region401	ColonTransverse	cg04260224	0.337171	0.3681	chr4_3297073_T_C_b38
UKB_21001_Body_mass_index_BMI	region54	ColonTransverse	cg21542223	0.552307	0.491	chr1_90727492_A_T_b38
UKB_21001_Body_mass_index_BMI	region571	ColonTransverse	cg06892714	0.663553	0.6128	chr5_88690497_C_A_b38
UKB_21001_Body_mass_index_BMI	region571	ColonTransverse	cg08480826	0.669941	0.632	chr5_88693117_T_C_b38
UKB_21001_Body_mass_index_BMI	region581	ColonTransverse	cg24224080	0.495522	0.3327	chr5_106415801_A_G_b38
UKB_21001_Body_mass_index_BMI	region599	ColonTransverse	cg21752471	0.732026	0.7404	chr5_134529762_A_G_b38
UKB_21001_Body_mass_index_BMI	region601	ColonTransverse	cg00187557	0.744415	0.9109	chr5_139701160_A_G_b38
UKB_21001_Body_mass_index_BMI	region601	ColonTransverse	cg13575217	0.475021	0.9109	chr5_139701160_A_G_b38
UKB_21001_Body_mass_index_BMI	region601	ColonTransverse	cg15022039	0.841715	0.9109	chr5_139701160_A_G_b38
UKB_21001_Body_mass_index_BMI	region68	ColonTransverse	cg18156192	0.419258	0.4	chr1_111772828_A_C_b38
UKB_21001_Body_mass_index_BMI	region702	ColonTransverse	cg14618923	0.323772	0.5022	chr6_108567390_C_G_b38
UKB_21001_Body_mass_index_BMI	region979	ColonTransverse	cg01176130	0.401308	0.3484	chr9_89576341_C_T_b38
UKB_21001_Body_mass_index_BMI	region103	KidneyCortex	cg07346359	0.476397	0.4156	chr1_203520555_C_T_b38
UKB_21001_Body_mass_index_BMI	region103	KidneyCortex	cg19823512	0.433741	0.4281	chr1_203520555_C_T_b38
UKB_21001_Body_mass_index_BMI	region1103	KidneyCortex	cg09783949	0.487395	0.4757	chr11_13324747_T_C_b38
UKB_21001_Body_mass_index_BMI	region1309	KidneyCortex	cg01244946	0.672643	0.5767	chr13_98584217_G_A_b38
UKB_21001_Body_mass_index_BMI	region1415	KidneyCortex	cg03950166	0.762058	0.8343	chr15_80696259_G_A_b38
UKB_21001_Body_mass_index_BMI	region381	KidneyCortex	cg13519184	0.695093	0.7357	chr3_173396515_A_G_b38
UKB_21001_Body_mass_index_BMI	region571	KidneyCortex	cg06892714	0.380591	0.3813	chr5_88693117_T_C_b38
UKB_21001_Body_mass_index_BMI	region581	KidneyCortex	cg02505588	0.406456	0.5027	chr5_106415801_A_G_b38
UKB_21001_Body_mass_index_BMI	region103	Lung	cg03698766	0.519716	0.4043	chr1_203516014_C_T_b38
UKB_21001_Body_mass_index_BMI	region103	Lung	cg07346359	0.448678	0.3749	chr1_203520555_C_T_b38
UKB_21001_Body_mass_index_BMI	region103	Lung	cg19823512	0.448685	0.3749	chr1_203520555_C_T_b38
UKB_21001_Body_mass_index_BMI	region1063	Lung	cg23618091	0.381028	0.323	chr10_86359258_A_G_b38
UKB_21001_Body_mass_index_BMI	region1074	Lung	cg05873389	0.378658	0.3569	chr10_102873487_T_A_b38
UKB_21001_Body_mass_index_BMI	region1091	Lung	cg01261798	0.328209	0.3182	chr10_132187458_G_A_b38
UKB_21001_Body_mass_index_BMI	region1091	Lung	cg02578540	0.425742	0.3485	chr10_132186626_C_T_b38
UKB_21001_Body_mass_index_BMI	region1091	Lung	cg05652533	0.42904	0.3479	chr10_132186626_C_T_b38
UKB_21001_Body_mass_index_BMI	region1091	Lung	cg06416097	0.346186	0.4406	chr10_132171412_G_A_b38
UKB_21001_Body_mass_index_BMI	region1091	Lung	cg07295678	0.421209	0.3421	chr10_132186626_C_T_b38
UKB_21001_Body_mass_index_BMI	region1091	Lung	cg08204808	0.352877	0.3528	chr10_132193504_C_A_b38
UKB_21001_Body_mass_index_BMI	region1094	Lung	cg15955074	0.63254	0.5585	chr11_840363_C_T_b38
UKB_21001_Body_mass_index_BMI	region1094	Lung	cg24134897	0.509753	0.4101	chr11_840363_C_T_b38
UKB_21001_Body_mass_index_BMI	region1103	Lung	cg09783949	0.531864	0.4349	chr11_13324747_T_C_b38
UKB_21001_Body_mass_index_BMI	region1129	Lung	cg00576331	0.71204	0.6185	chr11_65873435_C_T_b38
UKB_21001_Body_mass_index_BMI	region1129	Lung	cg05783341	0.695659	0.6417	chr11_65873091_G_A_b38
UKB_21001_Body_mass_index_BMI	region1162	Lung	cg22994024	0.792298	0.7324	chr11_115174130_C_A_b38
UKB_21001_Body_mass_index_BMI	region1231	Lung	cg05403689	0.41359	0.3275	chr12_89354806_AGGG_A_b38
UKB_21001_Body_mass_index_BMI	region1231	Lung	cg05589489	0.431904	0.3275	chr12_89354806_AGGG_A_b38
UKB_21001_Body_mass_index_BMI	region1231	Lung	cg08802841	0.409097	0.3275	chr12_89354806_AGGG_A_b38
UKB_21001_Body_mass_index_BMI	region1231	Lung	cg12414174	0.424759	0.3275	chr12_89354806_AGGG_A_b38
UKB_21001_Body_mass_index_BMI	region1231	Lung	cg13519918	0.398968	0.3275	chr12_89354806_AGGG_A_b38
UKB_21001_Body_mass_index_BMI	region1231	Lung	cg15296664	0.391689	0.3217	chr12_89351700_C_A_b38
UKB_21001_Body_mass_index_BMI	region128	Lung	cg12298890	0.394035	0.3346	chr1_243420597_T_G_b38
UKB_21001_Body_mass_index_BMI	region1406	Lung	cg26665444	0.457275	0.4066	chr15_63497280_G_A_b38
UKB_21001_Body_mass_index_BMI	region1407	Lung	cg24009358	0.352798	0.3851	chr15_66505154_G_A_b38
UKB_21001_Body_mass_index_BMI	region1411	Lung	cg08637403	0.33807	0.4514	chr15_72801650_C_T_b38
UKB_21001_Body_mass_index_BMI	region1411	Lung	cg09505846	0.481465	0.36	chr15_72796528_A_T_b38
UKB_21001_Body_mass_index_BMI	region1411	Lung	cg25632853	0.489657	0.416	chr15_72798942_G_T_b38
UKB_21001_Body_mass_index_BMI	region1415	Lung	cg03950166	0.827097	0.8193	chr15_80699106_T_C_b38
UKB_21001_Body_mass_index_BMI	region1430	Lung	cg21863351	0.663063	0.4364	chr16_3641654_G_C_b38
UKB_21001_Body_mass_index_BMI	region1431	Lung	cg27066052	0.881006	0.7449	chr16_3964281_C_G_b38
UKB_21001_Body_mass_index_BMI	region1466	Lung	cg00430542	0.731946	0.6578	chr16_73063130_G_A_b38
UKB_21001_Body_mass_index_BMI	region1466	Lung	cg00808086	0.62904	0.6437	chr16_73063130_G_A_b38
UKB_21001_Body_mass_index_BMI	region1466	Lung	cg08144675	0.729881	0.6251	chr16_73063130_G_A_b38
UKB_21001_Body_mass_index_BMI	region1466	Lung	cg09780180	0.737975	0.7081	chr16_73063130_G_A_b38
UKB_21001_Body_mass_index_BMI	region1466	Lung	cg27359566	0.651657	0.8849	chr16_73063130_G_A_b38
UKB_21001_Body_mass_index_BMI	region146	Lung	cg01884057	0.491658	0.3878	chr2_24927247_C_A_b38
UKB_21001_Body_mass_index_BMI	region1487	Lung	cg25750800	0.620995	0.3297	chr17_7192188_C_T_b38
UKB_21001_Body_mass_index_BMI	region1526	Lung	cg01765967	0.946261	0.968	chr17_80783826_A_G_b38
UKB_21001_Body_mass_index_BMI	region1580	Lung	cg08620237	0.474368	0.4299	chr19_4061546_C_T_b38
UKB_21001_Body_mass_index_BMI	region1608	Lung	cg16082401	0.75214	0.6796	chr19_45678134_G_C_b38
UKB_21001_Body_mass_index_BMI	region1608	Lung	cg17144108	0.725878	0.6836	chr19_45678134_G_C_b38
UKB_21001_Body_mass_index_BMI	region1608	Lung	cg17351154	0.749505	0.8196	chr19_45679046_T_A_b38
UKB_21001_Body_mass_index_BMI	region1608	Lung	cg18735402	0.660496	0.679	chr19_45678134_G_C_b38
UKB_21001_Body_mass_index_BMI	region1608	Lung	cg19822309	0.677659	0.6836	chr19_45678134_G_C_b38
UKB_21001_Body_mass_index_BMI	region1608	Lung	cg20434926	0.563085	0.6479	chr19_45678134_G_C_b38
UKB_21001_Body_mass_index_BMI	region1644	Lung	cg03364549	0.472032	0.4659	chr20_46289579_G_A_b38
UKB_21001_Body_mass_index_BMI	region1672	Lung	cg01365531	0.596379	0.6335	chr21_39197582_T_C_b38
UKB_21001_Body_mass_index_BMI	region19	Lung	cg27650656	0.663269	0.6568	chr1_31728046_T_C_b38
UKB_21001_Body_mass_index_BMI	region1	Lung	cg05697835	0.630656	0.5425	chr1_2806283_C_T_b38
UKB_21001_Body_mass_index_BMI	region1	Lung	cg11824422	0.31144	0.6882	chr1_2496273_C_T_b38
UKB_21001_Body_mass_index_BMI	region1	Lung	cg17455297	0.546808	0.5466	chr1_2806649_C_A_b38
UKB_21001_Body_mass_index_BMI	region341	Lung	cg25236749	0.648108	0.6824	chr3_104905261_A_T_b38
UKB_21001_Body_mass_index_BMI	region379	Lung	cg24796450	0.420264	0.3159	chr3_170998041_G_A_b38
UKB_21001_Body_mass_index_BMI	region381	Lung	cg13519184	0.774217	0.6527	chr3_173396515_A_G_b38
UKB_21001_Body_mass_index_BMI	region444	Lung	cg09632271	0.39435	0.3254	chr4_67575865_T_C_b38
UKB_21001_Body_mass_index_BMI	region571	Lung	cg02225085	0.693513	0.6582	chr5_88693117_T_C_b38
UKB_21001_Body_mass_index_BMI	region571	Lung	cg06892714	0.667712	0.6277	chr5_88690497_C_A_b38
UKB_21001_Body_mass_index_BMI	region581	Lung	cg24224080	0.45982	0.4601	chr5_106415801_A_G_b38
UKB_21001_Body_mass_index_BMI	region599	Lung	cg13728768	0.794218	0.7705	chr5_134526066_C_T_b38
UKB_21001_Body_mass_index_BMI	region599	Lung	cg21752471	0.749834	0.7093	chr5_134528909_G_A_b38
UKB_21001_Body_mass_index_BMI	region601	Lung	cg00187557	0.395528	0.9172	chr5_139701160_A_G_b38
UKB_21001_Body_mass_index_BMI	region601	Lung	cg05487895	0.805201	0.9172	chr5_139701160_A_G_b38
UKB_21001_Body_mass_index_BMI	region601	Lung	cg13575217	0.694158	0.9172	chr5_139701160_A_G_b38
UKB_21001_Body_mass_index_BMI	region640	Lung	cg11615758	0.340207	0.3106	chr6_13182763_G_A_b38
UKB_21001_Body_mass_index_BMI	region73	Lung	cg23010096	0.311897	0.3001	chr1_151046385_A_G_b38
UKB_21001_Body_mass_index_BMI	region743	Lung	cg03235290	0.359289	0.5076	chr7_1231063_G_A_b38
UKB_21001_Body_mass_index_BMI	region743	Lung	cg11561251	0.515152	0.4302	chr7_1234946_G_A_b38
UKB_21001_Body_mass_index_BMI	region834	Lung	cg10636020	0.489663	0.4272	chr7_150960007_G_A_b38
UKB_21001_Body_mass_index_BMI	region853	Lung	cg16773768	0.563902	0.4985	chr8_10386171_C_G_b38
UKB_21001_Body_mass_index_BMI	region979	Lung	cg01176130	0.407238	0.3674	chr9_89576341_C_T_b38
UKB_21001_Body_mass_index_BMI	region1415	MuscleSkeletal	cg03950166	0.747119	0.8453	chr15_80696831_C_T_b38
UKB_21001_Body_mass_index_BMI	region1600	MuscleSkeletal	cg03070989	0.469388	0.5179	chr19_33819895_A_G_b38
UKB_21001_Body_mass_index_BMI	region1608	MuscleSkeletal	cg17144108	0.755812	0.7212	chr19_45678134_G_C_b38
UKB_21001_Body_mass_index_BMI	region401	MuscleSkeletal	cg25354617	0.696837	0.7533	chr4_3240118_C_T_b38
UKB_21001_Body_mass_index_BMI	region571	MuscleSkeletal	cg06892714	0.555763	0.4682	chr5_88693117_T_C_b38
UKB_21001_Body_mass_index_BMI	region708	MuscleSkeletal	cg14710084	0.489967	0.5331	chr6_119203351_G_C_b38
UKB_21001_Body_mass_index_BMI	region103	Ovary	cg07346359	0.458738	0.3842	chr1_203520555_C_T_b38
UKB_21001_Body_mass_index_BMI	region103	Ovary	cg19823512	0.458738	0.3842	chr1_203520555_C_T_b38
UKB_21001_Body_mass_index_BMI	region1063	Ovary	cg23618091	0.45072	0.4496	chr10_86338038_G_A_b38
UKB_21001_Body_mass_index_BMI	region1074	Ovary	cg11784071	0.347116	0.4006	chr10_102875346_G_A_b38
UKB_21001_Body_mass_index_BMI	region1078	Ovary	cg09603306	0.338671	0.3017	chr10_113008850_A_G_b38
UKB_21001_Body_mass_index_BMI	region1086	Ovary	cg08323454	0.399539	0.3263	chr10_125038784_C_A_b38
UKB_21001_Body_mass_index_BMI	region1091	Ovary	cg00401463	0.311722	0.3158	chr10_132165302_G_T_b38
UKB_21001_Body_mass_index_BMI	region1091	Ovary	cg07295678	0.433337	0.381	chr10_132165458_T_C_b38
UKB_21001_Body_mass_index_BMI	region1091	Ovary	cg23348297	0.42276	0.4156	chr10_132171412_G_A_b38
UKB_21001_Body_mass_index_BMI	region1094	Ovary	cg15955074	0.640866	0.5683	chr11_840363_C_T_b38
UKB_21001_Body_mass_index_BMI	region1103	Ovary	cg09783949	0.541928	0.4446	chr11_13324747_T_C_b38
UKB_21001_Body_mass_index_BMI	region1114	Ovary	cg23064082	0.499869	0.4644	chr11_30408784_C_T_b38
UKB_21001_Body_mass_index_BMI	region1129	Ovary	cg00576331	0.858192	0.8055	chr11_65871903_C_T_b38
UKB_21001_Body_mass_index_BMI	region1129	Ovary	cg05783341	0.689078	0.6177	chr11_65874460_T_A_b38
UKB_21001_Body_mass_index_BMI	region1130	Ovary	cg01021410	0.540478	0.4154	chr11_66273608_G_A_b38
UKB_21001_Body_mass_index_BMI	region1212	Ovary	cg05024612	0.946414	0.9618	chr12_56114625_G_C_b38
UKB_21001_Body_mass_index_BMI	region128	Ovary	cg12298890	0.404563	0.4549	chr1_243421043_G_A_b38
UKB_21001_Body_mass_index_BMI	region1309	Ovary	cg01244946	0.378419	0.5434	chr13_98584217_G_A_b38
UKB_21001_Body_mass_index_BMI	region1373	Ovary	cg05029961	0.975745	0.9445	chr14_101062668_A_G_b38
UKB_21001_Body_mass_index_BMI	region1373	Ovary	cg14007694	0.417449	0.351	chr14_101065517_A_G_b38
UKB_21001_Body_mass_index_BMI	region1415	Ovary	cg03950166	0.749244	0.6833	chr15_80696259_G_A_b38
UKB_21001_Body_mass_index_BMI	region1415	Ovary	cg16230724	0.842626	0.8282	chr15_80696831_C_T_b38
UKB_21001_Body_mass_index_BMI	region1415	Ovary	cg22185019	0.784879	0.7968	chr15_80696831_C_T_b38
UKB_21001_Body_mass_index_BMI	region1430	Ovary	cg21863351	0.3202	0.4462	chr16_3641654_G_C_b38
UKB_21001_Body_mass_index_BMI	region1466	Ovary	cg08144675	0.754745	0.6291	chr16_73063130_G_A_b38
UKB_21001_Body_mass_index_BMI	region1509	Ovary	cg14634687	0.333977	0.3122	chr17_49017679_G_A_b38
UKB_21001_Body_mass_index_BMI	region1591	Ovary	cg25486145	0.441054	0.3502	chr19_18719894_A_G_b38
UKB_21001_Body_mass_index_BMI	region1608	Ovary	cg17144108	0.694056	0.6921	chr19_45678134_G_C_b38
UKB_21001_Body_mass_index_BMI	region1608	Ovary	cg17351154	0.644297	0.8253	chr19_45679046_T_A_b38
UKB_21001_Body_mass_index_BMI	region1608	Ovary	cg19822309	0.778977	0.8253	chr19_45679046_T_A_b38
UKB_21001_Body_mass_index_BMI	region1644	Ovary	cg17499682	0.626366	0.5473	chr20_46283315_A_G_b38
UKB_21001_Body_mass_index_BMI	region1672	Ovary	cg21203420	0.347198	0.5458	chr21_39311814_A_G_b38
UKB_21001_Body_mass_index_BMI	region19	Ovary	cg27650656	0.422004	0.3679	chr1_31707759_G_A_b38
UKB_21001_Body_mass_index_BMI	region306	Ovary	cg11170016	0.453584	0.4407	chr3_44002852_C_T_b38
UKB_21001_Body_mass_index_BMI	region310	Ovary	cg24308560	0.521269	0.4036	chr3_49912401_A_T_b38
UKB_21001_Body_mass_index_BMI	region379	Ovary	cg24796450	0.430158	0.3443	chr3_170998041_G_A_b38
UKB_21001_Body_mass_index_BMI	region381	Ovary	cg13519184	0.488891	0.4486	chr3_173395890_C_G_b38
UKB_21001_Body_mass_index_BMI	region571	Ovary	cg06892714	0.65103	0.6311	chr5_88693117_T_C_b38
UKB_21001_Body_mass_index_BMI	region581	Ovary	cg24224080	0.563052	0.4927	chr5_106415801_A_G_b38
UKB_21001_Body_mass_index_BMI	region601	Ovary	cg00187557	0.45208	0.9201	chr5_139701160_A_G_b38
UKB_21001_Body_mass_index_BMI	region601	Ovary	cg05487895	0.808307	0.9201	chr5_139701160_A_G_b38
UKB_21001_Body_mass_index_BMI	region601	Ovary	cg13575217	0.852309	0.9201	chr5_139701160_A_G_b38
UKB_21001_Body_mass_index_BMI	region601	Ovary	cg15022039	0.53151	0.92	chr5_139701160_A_G_b38
UKB_21001_Body_mass_index_BMI	region855	Ovary	cg05635807	0.336028	0.4818	chr8_11559984_T_C_b38
UKB_21001_Body_mass_index_BMI	region979	Ovary	cg01176130	0.581446	0.5183	chr9_89568498_C_T_b38
UKB_21001_Body_mass_index_BMI	region103	Prostate	cg07346359	0.457711	0.3961	chr1_203520555_C_T_b38
UKB_21001_Body_mass_index_BMI	region103	Prostate	cg19823512	0.457711	0.3961	chr1_203520555_C_T_b38
UKB_21001_Body_mass_index_BMI	region1070	Prostate	cg03892781	0.563637	0.5295	chr10_98009631_T_C_b38
UKB_21001_Body_mass_index_BMI	region1070	Prostate	cg08144021	0.770057	0.5794	chr10_98018469_A_G_b38
UKB_21001_Body_mass_index_BMI	region1070	Prostate	cg14054275	0.501865	0.4407	chr10_98012647_G_A_b38
UKB_21001_Body_mass_index_BMI	region1091	Prostate	cg02881742	0.325263	0.3379	chr10_132187458_G_A_b38
UKB_21001_Body_mass_index_BMI	region1094	Prostate	cg15955074	0.563828	0.5169	chr11_840363_C_T_b38
UKB_21001_Body_mass_index_BMI	region1094	Prostate	cg23534766	0.566987	0.4801	chr11_840363_C_T_b38
UKB_21001_Body_mass_index_BMI	region1103	Prostate	cg09783949	0.545344	0.4494	chr11_13324747_T_C_b38
UKB_21001_Body_mass_index_BMI	region1129	Prostate	cg00576331	0.631394	0.5779	chr11_65873091_G_A_b38
UKB_21001_Body_mass_index_BMI	region1411	Prostate	cg25632853	0.33934	0.4312	chr15_72798942_G_T_b38
UKB_21001_Body_mass_index_BMI	region1430	Prostate	cg21863351	0.635092	0.458	chr16_3641654_G_C_b38
UKB_21001_Body_mass_index_BMI	region146	Prostate	cg15423357	0.308148	0.3981	chr2_24927247_C_A_b38
UKB_21001_Body_mass_index_BMI	region146	Prostate	cg20518994	0.446087	0.3129	chr2_24927772_A_G_b38
UKB_21001_Body_mass_index_BMI	region1561	Prostate	cg11436943	0.407396	0.4059	chr18_60161902_T_C_b38
UKB_21001_Body_mass_index_BMI	region1591	Prostate	cg10266068	0.383722	0.4222	chr19_18713546_T_TGCACCCTTAGGCGTCCTCCTCGTGCCCC_b38
UKB_21001_Body_mass_index_BMI	region1591	Prostate	cg16673477	0.645218	0.5798	chr19_18723704_C_T_b38
UKB_21001_Body_mass_index_BMI	region1608	Prostate	cg17144108	0.743153	0.7026	chr19_45678134_G_C_b38
UKB_21001_Body_mass_index_BMI	region1608	Prostate	cg18735402	0.542123	0.7443	chr19_45679046_T_A_b38
UKB_21001_Body_mass_index_BMI	region1608	Prostate	cg19822309	0.764837	0.7841	chr19_45679046_T_A_b38
UKB_21001_Body_mass_index_BMI	region1645	Prostate	cg25380214	0.689981	0.6163	chr20_48833526_C_T_b38
UKB_21001_Body_mass_index_BMI	region571	Prostate	cg06892714	0.47667	0.3418	chr5_88693117_T_C_b38
UKB_21001_Body_mass_index_BMI	region599	Prostate	cg21752471	0.678719	0.7917	chr5_134525973_C_T_b38
UKB_21001_Body_mass_index_BMI	region619	Prostate	cg04001520	0.651214	0.8573	chr5_167559304_A_G_b38
UKB_21001_Body_mass_index_BMI	region649	Prostate	cg16482183	0.396734	0.3281	chr6_26053949_TA_T_b38
UKB_21001_Body_mass_index_BMI	region743	Prostate	cg15591276	0.390918	0.6092	chr7_1234946_G_A_b38
UKB_21001_Body_mass_index_BMI	region834	Prostate	cg11857646	0.399569	0.3741	chr7_150950881_C_T_b38
UKB_21001_Body_mass_index_BMI	region932	Prostate	cg03716032	0.62341	0.6729	chr8_141614427_G_T_b38
UKB_21001_Body_mass_index_BMI	region933	Prostate	cg21741708	0.541882	0.4209	chr8_142218918_G_A_b38
UKB_21001_Body_mass_index_BMI	region946	Prostate	cg23655995	0.380351	0.5078	chr9_14777397_G_A_b38
UKB_21001_Body_mass_index_BMI	region1415	Testis	cg03950166	0.809652	0.8101	chr15_80696831_C_T_b38
UKB_21001_Body_mass_index_BMI	region1600	Testis	cg03070989	0.420311	0.3367	chr19_33819895_A_G_b38
UKB_21001_Body_mass_index_BMI	region1608	Testis	cg17144108	0.679777	0.6806	chr19_45678134_G_C_b38
UKB_21001_Body_mass_index_BMI	region103	WholeBlood	cg07346359	0.464358	0.4144	chr1_203520555_C_T_b38
UKB_21001_Body_mass_index_BMI	region103	WholeBlood	cg19823512	0.464358	0.4144	chr1_203520555_C_T_b38
UKB_21001_Body_mass_index_BMI	region1231	WholeBlood	cg08802841	0.494539	0.3646	chr12_89354806_AGGG_A_b38
UKB_21001_Body_mass_index_BMI	region1231	WholeBlood	cg12414174	0.503646	0.3649	chr12_89354806_AGGG_A_b38
UKB_21001_Body_mass_index_BMI	region1231	WholeBlood	cg15296664	0.501989	0.3645	chr12_89354806_AGGG_A_b38
UKB_21001_Body_mass_index_BMI	region1430	WholeBlood	cg21863351	0.438378	0.4775	chr16_3641654_G_C_b38
UKB_21001_Body_mass_index_BMI	region146	WholeBlood	cg01884057	0.385715	0.4109	chr2_24927247_C_A_b38
UKB_21001_Body_mass_index_BMI	region1608	WholeBlood	cg17144108	0.770366	0.7183	chr19_45678134_G_C_b38
UKB_21001_Body_mass_index_BMI	region54	WholeBlood	cg27523527	0.587157	0.4935	chr1_90730619_T_C_b38
UKB_21001_Body_mass_index_BMI	region851	WholeBlood	cg16423305	0.530628	0.4012	chr8_8522714_A_G_b38
UKB_23099_Body_fat_percentage	region1164	BreastMammaryTissue	cg01985660	0.300241	0.3585	chr11_119071944_T_A_b38
UKB_23099_Body_fat_percentage	region1210	BreastMammaryTissue	cg18054172	0.35394	0.3192	chr12_54034748_C_T_b38
UKB_23099_Body_fat_percentage	region1415	BreastMammaryTissue	cg03950166	0.8427	0.8028	chr15_80696259_G_A_b38
UKB_23099_Body_fat_percentage	region147	BreastMammaryTissue	cg09153930	0.423971	0.4024	chr2_26730486_G_T_b38
UKB_23099_Body_fat_percentage	region401	BreastMammaryTissue	cg19224164	0.492164	0.4036	chr4_2955004_C_T_b38
UKB_23099_Body_fat_percentage	region581	BreastMammaryTissue	cg24224080	0.50126	0.4775	chr5_106415801_A_G_b38
UKB_23099_Body_fat_percentage	region5	BreastMammaryTissue	cg14004768	0.582692	0.5641	chr1_8424763_A_G_b38
UKB_23099_Body_fat_percentage	region5	BreastMammaryTissue	cg16484858	0.580249	0.5592	chr1_8424763_A_G_b38
UKB_23099_Body_fat_percentage	region5	BreastMammaryTissue	cg19465883	0.616997	0.5711	chr1_8424763_A_G_b38
UKB_23099_Body_fat_percentage	region923	BreastMammaryTissue	cg09012560	0.459113	0.3918	chr8_125488935_T_C_b38
UKB_23099_Body_fat_percentage	region1055	ColonTransverse	cg02503850	0.52539	0.6164	chr10_70668527_C_T_b38
UKB_23099_Body_fat_percentage	region1063	ColonTransverse	cg23618091	0.454857	0.3686	chr10_86359258_A_G_b38
UKB_23099_Body_fat_percentage	region1091	ColonTransverse	cg08204808	0.497309	0.468	chr10_132193504_C_A_b38
UKB_23099_Body_fat_percentage	region1091	ColonTransverse	cg12109455	0.426235	0.4288	chr10_132193504_C_A_b38
UKB_23099_Body_fat_percentage	region1103	ColonTransverse	cg09783949	0.689929	0.5777	chr11_13324747_T_C_b38
UKB_23099_Body_fat_percentage	region113	ColonTransverse	cg14124465	0.501672	0.4427	chr1_221912330_A_G_b38
UKB_23099_Body_fat_percentage	region1252	ColonTransverse	cg25459280	0.35996	0.3258	chr12_124004595_G_C_b38
UKB_23099_Body_fat_percentage	region1268	ColonTransverse	cg09469986	0.744199	0.5187	chr13_30438767_C_T_b38
UKB_23099_Body_fat_percentage	region128	ColonTransverse	cg12298890	0.436306	0.3468	chr1_243420597_T_G_b38
UKB_23099_Body_fat_percentage	region1309	ColonTransverse	cg12862266	0.305726	0.3217	chr13_98466336_C_T_b38
UKB_23099_Body_fat_percentage	region1385	ColonTransverse	cg20900050	0.730845	0.8706	chr15_31387813_G_A_b38
UKB_23099_Body_fat_percentage	region1415	ColonTransverse	cg03950166	0.880063	0.8226	chr15_80696831_C_T_b38
UKB_23099_Body_fat_percentage	region1431	ColonTransverse	cg01971227	0.830452	0.9052	chr16_3965728_C_T_b38
UKB_23099_Body_fat_percentage	region1431	ColonTransverse	cg05991492	0.818223	0.3234	chr16_3963466_C_T_b38
UKB_23099_Body_fat_percentage	region1431	ColonTransverse	cg27066052	0.807031	0.342	chr16_3964281_C_G_b38
UKB_23099_Body_fat_percentage	region1466	ColonTransverse	cg00430542	0.865288	0.5967	chr16_73063130_G_A_b38
UKB_23099_Body_fat_percentage	region1466	ColonTransverse	cg00808086	0.883065	0.6062	chr16_73063130_G_A_b38
UKB_23099_Body_fat_percentage	region1466	ColonTransverse	cg08144675	0.918391	0.5541	chr16_73063130_G_A_b38
UKB_23099_Body_fat_percentage	region1466	ColonTransverse	cg27359566	0.880802	0.7872	chr16_73063130_G_A_b38
UKB_23099_Body_fat_percentage	region146	ColonTransverse	cg01884057	0.607533	0.5357	chr2_24927247_C_A_b38
UKB_23099_Body_fat_percentage	region146	ColonTransverse	cg20518994	0.389112	0.4019	chr2_24927772_A_G_b38
UKB_23099_Body_fat_percentage	region1497	ColonTransverse	cg10487418	0.35415	0.3104	chr17_21372802_A_G_b38
UKB_23099_Body_fat_percentage	region1497	ColonTransverse	cg21504240	0.68727	0.5835	chr17_21375977_C_T_b38
UKB_23099_Body_fat_percentage	region1497	ColonTransverse	cg21806832	0.432418	0.3339	chr17_21364229_A_G_b38
UKB_23099_Body_fat_percentage	region1497	ColonTransverse	cg22639895	0.73433	0.6651	chr17_21376873_T_G_b38
UKB_23099_Body_fat_percentage	region1497	ColonTransverse	cg26857910	0.554991	0.6364	chr17_21376873_T_G_b38
UKB_23099_Body_fat_percentage	region1506	ColonTransverse	cg09509673	0.609579	0.6794	chr17_42569024_C_T_b38
UKB_23099_Body_fat_percentage	region1507	ColonTransverse	cg04520793	0.624656	0.5951	chr17_44212647_G_A_b38
UKB_23099_Body_fat_percentage	region1507	ColonTransverse	cg14455421	0.582745	0.7072	chr17_44212647_G_A_b38
UKB_23099_Body_fat_percentage	region1509	ColonTransverse	cg07854959	0.446642	0.4378	chr17_49016912_C_G_b38
UKB_23099_Body_fat_percentage	region1509	ColonTransverse	cg09029085	0.58464	0.4378	chr17_49016912_C_G_b38
UKB_23099_Body_fat_percentage	region1591	ColonTransverse	cg19851976	0.544936	0.4613	chr19_18701214_A_G_b38
UKB_23099_Body_fat_percentage	region1608	ColonTransverse	cg16082401	0.766995	0.6834	chr19_45678134_G_C_b38
UKB_23099_Body_fat_percentage	region1608	ColonTransverse	cg17144108	0.755931	0.6766	chr19_45678134_G_C_b38
UKB_23099_Body_fat_percentage	region1608	ColonTransverse	cg17351154	0.816679	0.8199	chr19_45679046_T_A_b38
UKB_23099_Body_fat_percentage	region1608	ColonTransverse	cg18735402	0.747945	0.7162	chr19_45678134_G_C_b38
UKB_23099_Body_fat_percentage	region1608	ColonTransverse	cg19822309	0.820628	0.8199	chr19_45679046_T_A_b38
UKB_23099_Body_fat_percentage	region1608	ColonTransverse	cg20434926	0.574651	0.6835	chr19_45678134_G_C_b38
UKB_23099_Body_fat_percentage	region1609	ColonTransverse	cg15274563	0.504288	0.4006	chr19_47078207_A_C_b38
UKB_23099_Body_fat_percentage	region1653	ColonTransverse	cg01176363	0.644935	0.5615	chr20_63738996_T_C_b38
UKB_23099_Body_fat_percentage	region1653	ColonTransverse	cg02966332	0.645958	0.4963	chr20_63738996_T_C_b38
UKB_23099_Body_fat_percentage	region1653	ColonTransverse	cg14039929	0.489023	0.5605	chr20_63738996_T_C_b38
UKB_23099_Body_fat_percentage	region1653	ColonTransverse	cg18725573	0.651243	0.5615	chr20_63738996_T_C_b38
UKB_23099_Body_fat_percentage	region1653	ColonTransverse	cg21849932	0.663056	0.5615	chr20_63738996_T_C_b38
UKB_23099_Body_fat_percentage	region1692	ColonTransverse	cg03162506	0.542509	0.4416	chr22_38184910_G_T_b38
UKB_23099_Body_fat_percentage	region170	ColonTransverse	cg09905256	0.354885	0.335	chr2_59080590_G_A_b38
UKB_23099_Body_fat_percentage	region227	ColonTransverse	cg22609984	0.393985	0.3178	chr2_160262176_T_C_b38
UKB_23099_Body_fat_percentage	region286	ColonTransverse	cg23145322	0.473611	0.593	chr3_15640433_C_A_b38
UKB_23099_Body_fat_percentage	region28	ColonTransverse	cg11399254	0.377765	0.3145	chr1_47228495_A_G_b38
UKB_23099_Body_fat_percentage	region305	ColonTransverse	cg15392992	0.393369	0.5363	chr3_42386465_G_A_b38
UKB_23099_Body_fat_percentage	region399	ColonTransverse	cg03286735	0.57043	0.4398	chr4_912859_A_G_b38
UKB_23099_Body_fat_percentage	region399	ColonTransverse	cg09237302	0.571231	0.4398	chr4_912859_A_G_b38
UKB_23099_Body_fat_percentage	region452	ColonTransverse	cg02457460	0.463782	0.4722	chr4_82287804_A_G_b38
UKB_23099_Body_fat_percentage	region4	ColonTransverse	cg21899939	0.460262	0.5248	chr1_6599445_G_A_b38
UKB_23099_Body_fat_percentage	region571	ColonTransverse	cg06892714	0.835673	0.8076	chr5_88690497_C_A_b38
UKB_23099_Body_fat_percentage	region571	ColonTransverse	cg08480826	0.782599	0.7728	chr5_88693117_T_C_b38
UKB_23099_Body_fat_percentage	region581	ColonTransverse	cg24224080	0.54156	0.3585	chr5_106415801_A_G_b38
UKB_23099_Body_fat_percentage	region597	ColonTransverse	cg25462716	0.682873	0.5348	chr5_128053152_G_A_b38
UKB_23099_Body_fat_percentage	region5	ColonTransverse	cg00120948	0.330761	0.6001	chr1_8422018_C_T_b38
UKB_23099_Body_fat_percentage	region5	ColonTransverse	cg01447281	0.466811	0.3013	chr1_8443319_C_A_b38
UKB_23099_Body_fat_percentage	region5	ColonTransverse	cg04317648	0.622487	0.4817	chr1_8429242_C_T_b38
UKB_23099_Body_fat_percentage	region5	ColonTransverse	cg14004768	0.648514	0.5983	chr1_8424763_A_G_b38
UKB_23099_Body_fat_percentage	region5	ColonTransverse	cg16484858	0.757917	0.6196	chr1_8422018_C_T_b38
UKB_23099_Body_fat_percentage	region5	ColonTransverse	cg19465883	0.758452	0.6468	chr1_8422018_C_T_b38
UKB_23099_Body_fat_percentage	region601	ColonTransverse	cg00187557	0.78833	0.9078	chr5_139701160_A_G_b38
UKB_23099_Body_fat_percentage	region601	ColonTransverse	cg13575217	0.539029	0.9078	chr5_139701160_A_G_b38
UKB_23099_Body_fat_percentage	region601	ColonTransverse	cg15022039	0.869058	0.9078	chr5_139701160_A_G_b38
UKB_23099_Body_fat_percentage	region649	ColonTransverse	cg17866778	0.623233	0.7739	chr6_26233159_A_G_b38
UKB_23099_Body_fat_percentage	region655	ColonTransverse	cg03228773	0.419949	0.4277	chr6_31659746_C_T_b38
UKB_23099_Body_fat_percentage	region745	ColonTransverse	cg02383674	0.550908	0.4587	chr7_2043526_G_T_b38
UKB_23099_Body_fat_percentage	region745	ColonTransverse	cg03006193	0.473683	0.5613	chr7_2039346_C_T_b38
UKB_23099_Body_fat_percentage	region853	ColonTransverse	cg14240994	0.462076	0.5425	chr8_9875989_A_C_b38
UKB_23099_Body_fat_percentage	region918	ColonTransverse	cg03431521	0.583244	0.6558	chr8_115659621_A_G_b38
UKB_23099_Body_fat_percentage	region92	ColonTransverse	cg21946987	0.316473	0.3135	chr1_184711947_A_G_b38
UKB_23099_Body_fat_percentage	region979	ColonTransverse	cg01176130	0.506094	0.4606	chr9_89576341_C_T_b38
UKB_23099_Body_fat_percentage	region1103	KidneyCortex	cg09783949	0.633759	0.6146	chr11_13324747_T_C_b38
UKB_23099_Body_fat_percentage	region1415	KidneyCortex	cg03950166	0.785183	0.8362	chr15_80696259_G_A_b38
UKB_23099_Body_fat_percentage	region1497	KidneyCortex	cg22639895	0.535665	0.6676	chr17_21376873_T_G_b38
UKB_23099_Body_fat_percentage	region1497	KidneyCortex	cg26857910	0.489643	0.7022	chr17_21376873_T_G_b38
UKB_23099_Body_fat_percentage	region1653	KidneyCortex	cg01176363	0.457019	0.6008	chr20_63738996_T_C_b38
UKB_23099_Body_fat_percentage	region1653	KidneyCortex	cg02966332	0.361731	0.3755	chr20_63738996_T_C_b38
UKB_23099_Body_fat_percentage	region1653	KidneyCortex	cg05643964	0.464257	0.405	chr20_63738996_T_C_b38
UKB_23099_Body_fat_percentage	region1692	KidneyCortex	cg25457927	0.371034	0.3028	chr22_38199813_T_G_b38
UKB_23099_Body_fat_percentage	region571	KidneyCortex	cg06892714	0.440646	0.3227	chr5_88690497_C_A_b38
UKB_23099_Body_fat_percentage	region581	KidneyCortex	cg02505588	0.444375	0.5039	chr5_106415801_A_G_b38
UKB_23099_Body_fat_percentage	region5	KidneyCortex	cg14004768	0.725419	0.601	chr1_8424763_A_G_b38
UKB_23099_Body_fat_percentage	region5	KidneyCortex	cg16484858	0.723635	0.6015	chr1_8424763_A_G_b38
UKB_23099_Body_fat_percentage	region5	KidneyCortex	cg19465883	0.712732	0.6014	chr1_8424763_A_G_b38
UKB_23099_Body_fat_percentage	region0	Lung	cg23430652	0.32862	0.3292	chr1_1628814_C_T_b38
UKB_23099_Body_fat_percentage	region1020	Lung	cg20779663	0.412009	0.3252	chr10_13532659_G_C_b38
UKB_23099_Body_fat_percentage	region1055	Lung	cg24427089	0.550027	0.54	chr10_70668527_C_T_b38
UKB_23099_Body_fat_percentage	region1063	Lung	cg23618091	0.478274	0.3749	chr10_86359258_A_G_b38
UKB_23099_Body_fat_percentage	region1091	Lung	cg06416097	0.327429	0.3096	chr10_132171412_G_A_b38
UKB_23099_Body_fat_percentage	region1091	Lung	cg08204808	0.431334	0.4748	chr10_132193504_C_A_b38
UKB_23099_Body_fat_percentage	region1103	Lung	cg09783949	0.703276	0.5842	chr11_13324747_T_C_b38
UKB_23099_Body_fat_percentage	region1129	Lung	cg22438356	0.685065	0.4724	chr11_66127695_A_G_b38
UKB_23099_Body_fat_percentage	region1130	Lung	cg21938894	0.406747	0.724	chr11_66293075_G_A_b38
UKB_23099_Body_fat_percentage	region1143	Lung	cg14384230	0.458011	0.892	chr11_90740789_A_G_b38
UKB_23099_Body_fat_percentage	region1231	Lung	cg15296664	0.673914	0.598	chr12_89351700_C_A_b38
UKB_23099_Body_fat_percentage	region1231	Lung	cg21616499	0.394718	0.5017	chr12_89369752_C_T_b38
UKB_23099_Body_fat_percentage	region128	Lung	cg12298890	0.435605	0.3529	chr1_243420597_T_G_b38
UKB_23099_Body_fat_percentage	region1309	Lung	cg13776039	0.343978	0.3577	chr13_98467353_G_A_b38
UKB_23099_Body_fat_percentage	region1385	Lung	cg20900050	0.814484	0.6684	chr15_31397340_G_A_b38
UKB_23099_Body_fat_percentage	region1411	Lung	cg08637403	0.394363	0.5238	chr15_72801650_C_T_b38
UKB_23099_Body_fat_percentage	region1411	Lung	cg09505846	0.529115	0.3457	chr15_72796528_A_T_b38
UKB_23099_Body_fat_percentage	region1411	Lung	cg25632853	0.572049	0.473	chr15_72798942_G_T_b38
UKB_23099_Body_fat_percentage	region1415	Lung	cg03950166	0.839118	0.7775	chr15_80699106_T_C_b38
UKB_23099_Body_fat_percentage	region1431	Lung	cg27066052	0.89958	0.7413	chr16_3964281_C_G_b38
UKB_23099_Body_fat_percentage	region1466	Lung	cg00430542	0.917679	0.72	chr16_73063130_G_A_b38
UKB_23099_Body_fat_percentage	region1466	Lung	cg00808086	0.856714	0.7051	chr16_73063130_G_A_b38
UKB_23099_Body_fat_percentage	region1466	Lung	cg08144675	0.916571	0.6863	chr16_73063130_G_A_b38
UKB_23099_Body_fat_percentage	region1466	Lung	cg09780180	0.920959	0.7716	chr16_73063130_G_A_b38
UKB_23099_Body_fat_percentage	region1466	Lung	cg27359566	0.870987	0.953	chr16_73063130_G_A_b38
UKB_23099_Body_fat_percentage	region146	Lung	cg01884057	0.656717	0.5543	chr2_24927247_C_A_b38
UKB_23099_Body_fat_percentage	region146	Lung	cg15423357	0.477136	0.4346	chr2_24927247_C_A_b38
UKB_23099_Body_fat_percentage	region1487	Lung	cg25750800	0.667316	0.3696	chr17_7192188_C_T_b38
UKB_23099_Body_fat_percentage	region1497	Lung	cg21504240	0.541993	0.5884	chr17_21375977_C_T_b38
UKB_23099_Body_fat_percentage	region1497	Lung	cg22639895	0.761249	0.6733	chr17_21376873_T_G_b38
UKB_23099_Body_fat_percentage	region1497	Lung	cg26857910	0.743002	0.6729	chr17_21376873_T_G_b38
UKB_23099_Body_fat_percentage	region1499	Lung	cg24984698	0.525611	0.4588	chr17_30219896_C_T_b38
UKB_23099_Body_fat_percentage	region1507	Lung	cg12607525	0.310277	0.7296	chr17_44208372_T_C_b38
UKB_23099_Body_fat_percentage	region1507	Lung	cg16988970	0.401539	0.4981	chr17_44201548_G_C_b38
UKB_23099_Body_fat_percentage	region1507	Lung	cg22998028	0.46754	0.7264	chr17_44212647_G_A_b38
UKB_23099_Body_fat_percentage	region1509	Lung	cg09029085	0.475632	0.4217	chr17_49016912_C_G_b38
UKB_23099_Body_fat_percentage	region1509	Lung	cg14634687	0.564858	0.4444	chr17_49016912_C_G_b38
UKB_23099_Body_fat_percentage	region1526	Lung	cg01765967	0.893617	0.8813	chr17_80783826_A_G_b38
UKB_23099_Body_fat_percentage	region1580	Lung	cg08620237	0.494574	0.4051	chr19_4061546_C_T_b38
UKB_23099_Body_fat_percentage	region1590	Lung	cg14317046	0.526942	0.5548	chr19_18106200_A_G_b38
UKB_23099_Body_fat_percentage	region1591	Lung	cg16673477	0.589215	0.5099	chr19_18698105_T_A_b38
UKB_23099_Body_fat_percentage	region1591	Lung	cg19851976	0.579584	0.4976	chr19_18701975_A_G_b38
UKB_23099_Body_fat_percentage	region1608	Lung	cg16082401	0.792292	0.7234	chr19_45678134_G_C_b38
UKB_23099_Body_fat_percentage	region1608	Lung	cg17144108	0.776832	0.6825	chr19_45678134_G_C_b38
UKB_23099_Body_fat_percentage	region1608	Lung	cg17351154	0.791422	0.8239	chr19_45679046_T_A_b38
UKB_23099_Body_fat_percentage	region1608	Lung	cg18735402	0.717662	0.7228	chr19_45678134_G_C_b38
UKB_23099_Body_fat_percentage	region1608	Lung	cg19822309	0.744132	0.6825	chr19_45678134_G_C_b38
UKB_23099_Body_fat_percentage	region1608	Lung	cg20434926	0.627188	0.6902	chr19_45678134_G_C_b38
UKB_23099_Body_fat_percentage	region1653	Lung	cg01176363	0.576894	0.5681	chr20_63738996_T_C_b38
UKB_23099_Body_fat_percentage	region1653	Lung	cg02966332	0.677516	0.5091	chr20_63738996_T_C_b38
UKB_23099_Body_fat_percentage	region1653	Lung	cg05643964	0.519407	0.5681	chr20_63738996_T_C_b38
UKB_23099_Body_fat_percentage	region1653	Lung	cg09747669	0.466787	0.3597	chr20_63740795_G_C_b38
UKB_23099_Body_fat_percentage	region1653	Lung	cg14039929	0.61564	0.5681	chr20_63738996_T_C_b38
UKB_23099_Body_fat_percentage	region1653	Lung	cg18725573	0.508373	0.5469	chr20_63738996_T_C_b38
UKB_23099_Body_fat_percentage	region1653	Lung	cg20626587	0.316764	0.3756	chr20_63741353_G_A_b38
UKB_23099_Body_fat_percentage	region1672	Lung	cg01365531	0.380137	0.4001	chr21_39197582_T_C_b38
UKB_23099_Body_fat_percentage	region1692	Lung	cg03162506	0.560901	0.4483	chr22_38184910_G_T_b38
UKB_23099_Body_fat_percentage	region170	Lung	cg09905256	0.530736	0.4096	chr2_59085540_T_C_b38
UKB_23099_Body_fat_percentage	region19	Lung	cg20975182	0.569881	0.6228	chr1_31742389_G_A_b38
UKB_23099_Body_fat_percentage	region236	Lung	cg01018128	0.700512	0.7089	chr2_174373448_C_A_b38
UKB_23099_Body_fat_percentage	region248	Lung	cg02250200	0.387327	0.3022	chr2_197300397_G_A_b38
UKB_23099_Body_fat_percentage	region28	Lung	cg11399254	0.363738	0.3429	chr1_47219005_T_G_b38
UKB_23099_Body_fat_percentage	region399	Lung	cg06154597	0.3003	0.428	chr4_912859_A_G_b38
UKB_23099_Body_fat_percentage	region399	Lung	cg07792858	0.387765	0.4431	chr4_912859_A_G_b38
UKB_23099_Body_fat_percentage	region399	Lung	cg08937613	0.586153	0.4464	chr4_912859_A_G_b38
UKB_23099_Body_fat_percentage	region399	Lung	cg09237302	0.586611	0.4464	chr4_912859_A_G_b38
UKB_23099_Body_fat_percentage	region399	Lung	cg20085268	0.554566	0.4735	chr4_966293_G_A_b38
UKB_23099_Body_fat_percentage	region4	Lung	cg01881062	0.589319	0.5898	chr1_6600289_A_G_b38
UKB_23099_Body_fat_percentage	region560	Lung	cg21931263	0.996868	0.9966	chr5_68418419_A_G_b38
UKB_23099_Body_fat_percentage	region563	Lung	cg26621088	0.423883	0.4195	chr5_75669729_A_G_b38
UKB_23099_Body_fat_percentage	region571	Lung	cg02225085	0.76754	0.7754	chr5_88693117_T_C_b38
UKB_23099_Body_fat_percentage	region571	Lung	cg06892714	0.866057	0.8278	chr5_88690497_C_A_b38
UKB_23099_Body_fat_percentage	region581	Lung	cg24224080	0.520157	0.4702	chr5_106415801_A_G_b38
UKB_23099_Body_fat_percentage	region597	Lung	cg25462716	0.654806	0.5415	chr5_128053152_G_A_b38
UKB_23099_Body_fat_percentage	region5	Lung	cg04317648	0.558208	0.4491	chr1_8422018_C_T_b38
UKB_23099_Body_fat_percentage	region5	Lung	cg14004768	0.72254	0.6172	chr1_8422018_C_T_b38
UKB_23099_Body_fat_percentage	region5	Lung	cg16484858	0.72254	0.6092	chr1_8422018_C_T_b38
UKB_23099_Body_fat_percentage	region5	Lung	cg19465883	0.72254	0.6181	chr1_8422018_C_T_b38
UKB_23099_Body_fat_percentage	region5	Lung	cg25001161	0.306671	0.5702	chr1_8424763_A_G_b38
UKB_23099_Body_fat_percentage	region601	Lung	cg00187557	0.453425	0.91	chr5_139701160_A_G_b38
UKB_23099_Body_fat_percentage	region601	Lung	cg05487895	0.830735	0.91	chr5_139701160_A_G_b38
UKB_23099_Body_fat_percentage	region601	Lung	cg13575217	0.732842	0.91	chr5_139701160_A_G_b38
UKB_23099_Body_fat_percentage	region649	Lung	cg05353884	0.38535	0.662	chr6_26233159_A_G_b38
UKB_23099_Body_fat_percentage	region745	Lung	cg18483265	0.361074	0.4423	chr7_2042969_G_A_b38
UKB_23099_Body_fat_percentage	region764	Lung	cg02646423	0.398058	0.5334	chr7_27162670_A_G_b38
UKB_23099_Body_fat_percentage	region948	Lung	cg26485890	0.39854	0.3319	chr9_16743410_A_T_b38
UKB_23099_Body_fat_percentage	region979	Lung	cg01176130	0.447734	0.4635	chr9_89576341_C_T_b38
UKB_23099_Body_fat_percentage	region999	Lung	cg08433538	0.404567	0.3043	chr9_127060241_G_A_b38
UKB_23099_Body_fat_percentage	region1086	MuscleSkeletal	cg04497547	0.487875	0.3689	chr10_124761556_C_A_b38
UKB_23099_Body_fat_percentage	region1168	MuscleSkeletal	cg03803474	0.529978	0.4818	chr11_122879336_C_G_b38
UKB_23099_Body_fat_percentage	region1309	MuscleSkeletal	cg08765662	0.471534	0.3851	chr13_98467353_G_A_b38
UKB_23099_Body_fat_percentage	region1415	MuscleSkeletal	cg03950166	0.769176	0.8425	chr15_80696831_C_T_b38
UKB_23099_Body_fat_percentage	region146	MuscleSkeletal	cg20518994	0.49706	0.3932	chr2_24927772_A_G_b38
UKB_23099_Body_fat_percentage	region1497	MuscleSkeletal	cg22639895	0.696254	0.6175	chr17_21375977_C_T_b38
UKB_23099_Body_fat_percentage	region1497	MuscleSkeletal	cg26857910	0.770287	0.7012	chr17_21376873_T_G_b38
UKB_23099_Body_fat_percentage	region1591	MuscleSkeletal	cg19851976	0.582509	0.5403	chr19_18701975_A_G_b38
UKB_23099_Body_fat_percentage	region1608	MuscleSkeletal	cg17144108	0.786628	0.7099	chr19_45678134_G_C_b38
UKB_23099_Body_fat_percentage	region1653	MuscleSkeletal	cg01176363	0.524063	0.4457	chr20_63741353_G_A_b38
UKB_23099_Body_fat_percentage	region1692	MuscleSkeletal	cg16866941	0.434403	0.4904	chr22_38203357_G_A_b38
UKB_23099_Body_fat_percentage	region1692	MuscleSkeletal	cg25457927	0.377717	0.3031	chr22_38199813_T_G_b38
UKB_23099_Body_fat_percentage	region4	MuscleSkeletal	cg20060759	0.348055	0.3853	chr1_6599445_G_A_b38
UKB_23099_Body_fat_percentage	region571	MuscleSkeletal	cg06892714	0.610237	0.3918	chr5_88690497_C_A_b38
UKB_23099_Body_fat_percentage	region0	Ovary	cg01621974	0.358093	0.307	chr1_1628814_C_T_b38
UKB_23099_Body_fat_percentage	region1091	Ovary	cg00401463	0.40983	0.494	chr10_132165302_G_T_b38
UKB_23099_Body_fat_percentage	region1091	Ovary	cg07295678	0.505796	0.4125	chr10_132165458_T_C_b38
UKB_23099_Body_fat_percentage	region1091	Ovary	cg23348297	0.39543	0.3461	chr10_132171412_G_A_b38
UKB_23099_Body_fat_percentage	region1103	Ovary	cg09783949	0.684481	0.573	chr11_13324747_T_C_b38
UKB_23099_Body_fat_percentage	region1130	Ovary	cg01021410	0.55407	0.4217	chr11_66273608_G_A_b38
UKB_23099_Body_fat_percentage	region1160	Ovary	cg04283720	0.685753	0.639	chr11_113041828_T_C_b38
UKB_23099_Body_fat_percentage	region1160	Ovary	cg04642306	0.879255	0.8818	chr11_112962091_C_T_b38
UKB_23099_Body_fat_percentage	region1164	Ovary	cg01985660	0.377737	0.353	chr11_119070886_G_A_b38
UKB_23099_Body_fat_percentage	region1168	Ovary	cg03803474	0.5149	0.4282	chr11_122879336_C_G_b38
UKB_23099_Body_fat_percentage	region1210	Ovary	cg07461977	0.412439	0.3532	chr12_54027640_AT_A_b38
UKB_23099_Body_fat_percentage	region128	Ovary	cg12298890	0.440242	0.4791	chr1_243421043_G_A_b38
UKB_23099_Body_fat_percentage	region1309	Ovary	cg12862266	0.409118	0.3175	chr13_98466336_C_T_b38
UKB_23099_Body_fat_percentage	region1415	Ovary	cg03950166	0.774884	0.6807	chr15_80696259_G_A_b38
UKB_23099_Body_fat_percentage	region1415	Ovary	cg16230724	0.851352	0.7745	chr15_80696831_C_T_b38
UKB_23099_Body_fat_percentage	region1415	Ovary	cg22185019	0.800798	0.7543	chr15_80696831_C_T_b38
UKB_23099_Body_fat_percentage	region1466	Ovary	cg08144675	0.91986	0.6821	chr16_73063130_G_A_b38
UKB_23099_Body_fat_percentage	region1497	Ovary	cg21504240	0.724432	0.6778	chr17_21376873_T_G_b38
UKB_23099_Body_fat_percentage	region1497	Ovary	cg22639895	0.746102	0.6635	chr17_21376873_T_G_b38
UKB_23099_Body_fat_percentage	region1497	Ovary	cg26857910	0.746244	0.6632	chr17_21376873_T_G_b38
UKB_23099_Body_fat_percentage	region1499	Ovary	cg16186288	0.618127	0.4684	chr17_29756059_A_C_b38
UKB_23099_Body_fat_percentage	region1499	Ovary	cg24984698	0.348139	0.3412	chr17_30219896_C_T_b38
UKB_23099_Body_fat_percentage	region1509	Ovary	cg14634687	0.587083	0.4485	chr17_49017679_G_A_b38
UKB_23099_Body_fat_percentage	region1591	Ovary	cg07780199	0.328215	0.3617	chr19_18701214_A_G_b38
UKB_23099_Body_fat_percentage	region1591	Ovary	cg19851976	0.545257	0.4857	chr19_18701975_A_G_b38
UKB_23099_Body_fat_percentage	region1608	Ovary	cg17144108	0.73234	0.6724	chr19_45678134_G_C_b38
UKB_23099_Body_fat_percentage	region1608	Ovary	cg17351154	0.673605	0.8171	chr19_45679046_T_A_b38
UKB_23099_Body_fat_percentage	region1608	Ovary	cg19822309	0.795102	0.8171	chr19_45679046_T_A_b38
UKB_23099_Body_fat_percentage	region1653	Ovary	cg02966332	0.434538	0.3095	chr20_63738996_T_C_b38
UKB_23099_Body_fat_percentage	region1653	Ovary	cg05643964	0.53683	0.5567	chr20_63738996_T_C_b38
UKB_23099_Body_fat_percentage	region1653	Ovary	cg18725573	0.38341	0.5567	chr20_63738996_T_C_b38
UKB_23099_Body_fat_percentage	region1653	Ovary	cg21849932	0.577002	0.5567	chr20_63738996_T_C_b38
UKB_23099_Body_fat_percentage	region1653	Ovary	cg22961457	0.56605	0.5566	chr20_63738996_T_C_b38
UKB_23099_Body_fat_percentage	region1692	Ovary	cg03162506	0.321663	0.4369	chr22_38184910_G_T_b38
UKB_23099_Body_fat_percentage	region197	Ovary	cg14245473	0.899886	0.9146	chr2_112344343_T_C_b38
UKB_23099_Body_fat_percentage	region28	Ovary	cg23649500	0.359941	0.3764	chr1_47224766_G_T_b38
UKB_23099_Body_fat_percentage	region306	Ovary	cg11170016	0.5019	0.4978	chr3_44002852_C_T_b38
UKB_23099_Body_fat_percentage	region399	Ovary	cg02406484	0.456788	0.4184	chr4_987183_T_G_b38
UKB_23099_Body_fat_percentage	region399	Ovary	cg05320215	0.355707	0.4184	chr4_987183_T_G_b38
UKB_23099_Body_fat_percentage	region399	Ovary	cg21459867	0.396322	0.4177	chr4_987183_T_G_b38
UKB_23099_Body_fat_percentage	region571	Ovary	cg06892714	0.733087	0.7115	chr5_88690497_C_A_b38
UKB_23099_Body_fat_percentage	region581	Ovary	cg24224080	0.559319	0.5269	chr5_106415801_A_G_b38
UKB_23099_Body_fat_percentage	region5	Ovary	cg04317648	0.548978	0.4309	chr1_8424763_A_G_b38
UKB_23099_Body_fat_percentage	region5	Ovary	cg14004768	0.68169	0.532	chr1_8422018_C_T_b38
UKB_23099_Body_fat_percentage	region5	Ovary	cg16484858	0.571031	0.4996	chr1_8424763_A_G_b38
UKB_23099_Body_fat_percentage	region5	Ovary	cg19465883	0.65267	0.5085	chr1_8424763_A_G_b38
UKB_23099_Body_fat_percentage	region601	Ovary	cg00187557	0.476149	0.9061	chr5_139701160_A_G_b38
UKB_23099_Body_fat_percentage	region601	Ovary	cg05487895	0.815054	0.9061	chr5_139701160_A_G_b38
UKB_23099_Body_fat_percentage	region601	Ovary	cg13575217	0.856201	0.9061	chr5_139701160_A_G_b38
UKB_23099_Body_fat_percentage	region601	Ovary	cg15022039	0.545914	0.9061	chr5_139701160_A_G_b38
UKB_23099_Body_fat_percentage	region655	Ovary	cg03228773	0.722565	0.423	chr6_31659746_C_T_b38
UKB_23099_Body_fat_percentage	region745	Ovary	cg01843768	0.337489	0.4655	chr7_2043632_C_T_b38
UKB_23099_Body_fat_percentage	region745	Ovary	cg03006193	0.416552	0.5565	chr7_2039346_C_T_b38
UKB_23099_Body_fat_percentage	region745	Ovary	cg06100570	0.648003	0.5529	chr7_2039346_C_T_b38
UKB_23099_Body_fat_percentage	region92	Ovary	cg05045817	0.320772	0.3412	chr1_184691071_T_A_b38
UKB_23099_Body_fat_percentage	region979	Ovary	cg01176130	0.531259	0.4903	chr9_89568498_C_T_b38
UKB_23099_Body_fat_percentage	region1063	Prostate	cg23618091	0.339505	0.381	chr10_86351168_G_C_b38
UKB_23099_Body_fat_percentage	region1070	Prostate	cg03892781	0.657667	0.7337	chr10_98009631_T_C_b38
UKB_23099_Body_fat_percentage	region1070	Prostate	cg08144021	0.748724	0.5846	chr10_98018469_A_G_b38
UKB_23099_Body_fat_percentage	region1070	Prostate	cg14054275	0.513146	0.4721	chr10_98012647_G_A_b38
UKB_23099_Body_fat_percentage	region1091	Prostate	cg18228116	0.411516	0.3705	chr10_132193504_C_A_b38
UKB_23099_Body_fat_percentage	region1091	Prostate	cg24877675	0.411387	0.373	chr10_132193504_C_A_b38
UKB_23099_Body_fat_percentage	region1103	Prostate	cg09783949	0.682494	0.5787	chr11_13324747_T_C_b38
UKB_23099_Body_fat_percentage	region1122	Prostate	cg24977308	0.408571	0.3346	chr11_47600860_G_A_b38
UKB_23099_Body_fat_percentage	region1309	Prostate	cg12862266	0.402886	0.3314	chr13_98466336_C_T_b38
UKB_23099_Body_fat_percentage	region1367	Prostate	cg01742369	0.330629	0.3209	chr14_92606131_C_A_b38
UKB_23099_Body_fat_percentage	region1411	Prostate	cg25632853	0.373802	0.4706	chr15_72797921_C_T_b38
UKB_23099_Body_fat_percentage	region146	Prostate	cg15423357	0.378873	0.5444	chr2_24927247_C_A_b38
UKB_23099_Body_fat_percentage	region146	Prostate	cg20518994	0.595936	0.4529	chr2_24927772_A_G_b38
UKB_23099_Body_fat_percentage	region1497	Prostate	cg22639895	0.746506	0.6761	chr17_21376873_T_G_b38
UKB_23099_Body_fat_percentage	region1497	Prostate	cg26857910	0.697631	0.682	chr17_21376873_T_G_b38
UKB_23099_Body_fat_percentage	region1509	Prostate	cg14634687	0.373956	0.4525	chr17_49016036_T_C_b38
UKB_23099_Body_fat_percentage	region1591	Prostate	cg19851976	0.372083	0.5021	chr19_18701975_A_G_b38
UKB_23099_Body_fat_percentage	region1608	Prostate	cg17144108	0.769257	0.6862	chr19_45678134_G_C_b38
UKB_23099_Body_fat_percentage	region1608	Prostate	cg18735402	0.576418	0.7592	chr19_45679046_T_A_b38
UKB_23099_Body_fat_percentage	region1608	Prostate	cg19822309	0.787472	0.7728	chr19_45679046_T_A_b38
UKB_23099_Body_fat_percentage	region1645	Prostate	cg25380214	0.72497	0.6546	chr20_48833526_C_T_b38
UKB_23099_Body_fat_percentage	region1653	Prostate	cg01176363	0.424991	0.385	chr20_63741353_G_A_b38
UKB_23099_Body_fat_percentage	region1653	Prostate	cg02966332	0.423676	0.3844	chr20_63741353_G_A_b38
UKB_23099_Body_fat_percentage	region1653	Prostate	cg05643964	0.425068	0.3826	chr20_63741353_G_A_b38
UKB_23099_Body_fat_percentage	region1653	Prostate	cg17355385	0.437596	0.3824	chr20_63731211_G_T_b38
UKB_23099_Body_fat_percentage	region1653	Prostate	cg18725573	0.425355	0.3801	chr20_63741353_G_A_b38
UKB_23099_Body_fat_percentage	region1653	Prostate	cg21849932	0.429215	0.3754	chr20_63741353_G_A_b38
UKB_23099_Body_fat_percentage	region1653	Prostate	cg22961457	0.452074	0.5723	chr20_63738996_T_C_b38
UKB_23099_Body_fat_percentage	region248	Prostate	cg05230130	0.351975	0.3229	chr2_197299452_G_A_b38
UKB_23099_Body_fat_percentage	region597	Prostate	cg25462716	0.683268	0.6481	chr5_128070567_G_T_b38
UKB_23099_Body_fat_percentage	region5	Prostate	cg14004768	0.685348	0.615	chr1_8422018_C_T_b38
UKB_23099_Body_fat_percentage	region5	Prostate	cg19465883	0.686086	0.615	chr1_8422018_C_T_b38
UKB_23099_Body_fat_percentage	region601	Prostate	cg05487895	0.30259	0.9114	chr5_139701160_A_G_b38
UKB_23099_Body_fat_percentage	region619	Prostate	cg04001520	0.848329	0.9731	chr5_167559304_A_G_b38
UKB_23099_Body_fat_percentage	region745	Prostate	cg03006193	0.391104	0.5722	chr7_2039346_C_T_b38
UKB_23099_Body_fat_percentage	region946	Prostate	cg23655995	0.608539	0.6083	chr9_14777397_G_A_b38
UKB_23099_Body_fat_percentage	region1415	Testis	cg03950166	0.818963	0.8031	chr15_80696831_C_T_b38
UKB_23099_Body_fat_percentage	region146	Testis	cg01884057	0.403296	0.4975	chr2_24927247_C_A_b38
UKB_23099_Body_fat_percentage	region1497	Testis	cg22639895	0.674293	0.6335	chr17_21376873_T_G_b38
UKB_23099_Body_fat_percentage	region1497	Testis	cg26857910	0.340455	0.5447	chr17_21376873_T_G_b38
UKB_23099_Body_fat_percentage	region1608	Testis	cg17144108	0.705161	0.6634	chr19_45678134_G_C_b38
UKB_23099_Body_fat_percentage	region0	WholeBlood	cg00078456	0.314901	0.3544	chr1_1629572_TG_T_b38
UKB_23099_Body_fat_percentage	region146	WholeBlood	cg01884057	0.56167	0.5753	chr2_24927247_C_A_b38
UKB_23099_Body_fat_percentage	region1509	WholeBlood	cg09029085	0.500271	0.4784	chr17_49016036_T_C_b38
UKB_23099_Body_fat_percentage	region1509	WholeBlood	cg14634687	0.4025	0.4784	chr17_49016036_T_C_b38
UKB_23099_Body_fat_percentage	region1590	WholeBlood	cg03594868	0.408898	0.3362	chr19_18106200_A_G_b38
UKB_23099_Body_fat_percentage	region1591	WholeBlood	cg19851976	0.483706	0.5363	chr19_18701975_A_G_b38
UKB_23099_Body_fat_percentage	region1608	WholeBlood	cg17144108	0.797101	0.7082	chr19_45678134_G_C_b38
UKB_23099_Body_fat_percentage	region1692	WholeBlood	cg16866941	0.38323	0.5257	chr22_38205423_C_CCT_b38
UKB_23099_Body_fat_percentage	region1692	WholeBlood	cg25457927	0.360687	0.3014	chr22_38199813_T_G_b38
UKB_23099_Body_fat_percentage	region19	WholeBlood	cg20975182	0.757078	0.6469	chr1_31742389_G_A_b38
UKB_23099_Body_fat_percentage	region28	WholeBlood	cg11399254	0.363108	0.3239	chr1_47230909_C_A_b38
UKB_23099_Body_fat_percentage	region318	WholeBlood	cg05845219	0.361172	0.3125	chr3_64715470_A_G_b38
UKB_23099_Body_fat_percentage	region5	WholeBlood	cg14004768	0.712537	0.6004	chr1_8424763_A_G_b38
UKB_23099_Body_fat_percentage	region5	WholeBlood	cg16484858	0.713177	0.6004	chr1_8424763_A_G_b38
UKB_23099_Body_fat_percentage	region5	WholeBlood	cg19465883	0.629315	0.5433	chr1_8429242_C_T_b38
UKB_2395_2_Hair_or_balding_pattern_Pattern_2	region1	BreastMammaryTissue	cg14790876	0.382957	0.3218	chr1_2881892_G_A_b38
UKB_2395_2_Hair_or_balding_pattern_Pattern_2	region1	KidneyCortex	cg14790876	0.414525	0.3507	chr1_2881892_G_A_b38
UKB_2395_2_Hair_or_balding_pattern_Pattern_2	region1195	Ovary	cg26453462	0.372719	0.3619	chr12_26273487_T_C_b38
UKB_2395_2_Hair_or_balding_pattern_Pattern_2	region1	Ovary	cg03039243	0.569623	0.4398	chr1_2875388_C_T_b38
UKB_2395_2_Hair_or_balding_pattern_Pattern_2	region346	Ovary	cg05785919	0.328295	0.3687	chr3_114384900_C_T_b38
UKB_2395_2_Hair_or_balding_pattern_Pattern_2	region1	Prostate	cg14790876	0.36363	0.3135	chr1_2881291_C_T_b38
UKB_2395_2_Hair_or_balding_pattern_Pattern_2	region238	WholeBlood	cg05604158	0.312089	0.3771	chr2_176931389_G_A_b38
UKB_2395_3_Hair_or_balding_pattern_Pattern_3	region272	ColonTransverse	cg01206723	0.891761	0.9894	chr2_238787252_C_G_b38
UKB_2395_3_Hair_or_balding_pattern_Pattern_3	region272	ColonTransverse	cg24618169	0.826791	0.9731	chr2_238787252_C_G_b38
UKB_2395_3_Hair_or_balding_pattern_Pattern_3	region636	ColonTransverse	cg16961295	0.304801	0.7271	chr6_7101851_T_C_b38
UKB_2395_3_Hair_or_balding_pattern_Pattern_3	region272	Lung	cg01206723	0.987716	0.9825	chr2_238787252_C_G_b38
UKB_2395_3_Hair_or_balding_pattern_Pattern_3	region272	Lung	cg02763409	0.968904	0.9825	chr2_238787252_C_G_b38
UKB_2395_3_Hair_or_balding_pattern_Pattern_3	region272	Lung	cg07075307	0.987712	0.9825	chr2_238787252_C_G_b38
UKB_2395_3_Hair_or_balding_pattern_Pattern_3	region272	Lung	cg24618169	0.987341	0.9825	chr2_238787252_C_G_b38
UKB_2395_3_Hair_or_balding_pattern_Pattern_3	region610	Lung	cg07410188	0.552356	0.5206	chr5_154485372_G_C_b38
UKB_2395_3_Hair_or_balding_pattern_Pattern_3	region610	Lung	cg14674171	0.524499	0.5279	chr5_154486169_A_G_b38
UKB_2395_3_Hair_or_balding_pattern_Pattern_3	region700	Lung	cg21376090	0.323884	0.4753	chr6_105753733_G_A_b38
UKB_2395_3_Hair_or_balding_pattern_Pattern_3	region1195	Ovary	cg26453462	0.455436	0.4218	chr12_26273738_A_G_b38
UKB_2395_3_Hair_or_balding_pattern_Pattern_3	region272	Ovary	cg11886545	0.459199	0.5487	chr2_238787252_C_G_b38
UKB_2395_3_Hair_or_balding_pattern_Pattern_3	region610	Ovary	cg21718159	0.307465	0.4833	chr5_154487661_T_C_b38
UKB_2395_3_Hair_or_balding_pattern_Pattern_3	region74	Ovary	cg24449914	0.301603	0.4862	chr1_152110849_A_T_b38
UKB_2395_3_Hair_or_balding_pattern_Pattern_3	region272	Prostate	cg07075307	0.518525	0.5715	chr2_238787252_C_G_b38
UKB_2395_3_Hair_or_balding_pattern_Pattern_3	region272	Prostate	cg24618169	0.472153	0.6484	chr2_238787252_C_G_b38
UKB_2395_3_Hair_or_balding_pattern_Pattern_3	region175	Testis	cg12294361	0.375991	0.3386	chr2_67647847_T_A_b38
UKB_2395_4_Hair_or_balding_pattern_Pattern_4	region103	ColonTransverse	cg26274929	0.669706	0.9995	chr1_203996272_C_T_b38
UKB_2395_4_Hair_or_balding_pattern_Pattern_4	region1086	ColonTransverse	cg14251691	0.557701	0.5596	chr10_124649524_C_T_b38
UKB_2395_4_Hair_or_balding_pattern_Pattern_4	region1409	ColonTransverse	cg25095184	0.672563	0.6387	chr15_69751888_G_A_b38
UKB_2395_4_Hair_or_balding_pattern_Pattern_4	region143	ColonTransverse	cg01849587	0.361279	0.5028	chr2_19735272_T_G_b38
UKB_2395_4_Hair_or_balding_pattern_Pattern_4	region1563	ColonTransverse	cg13734729	0.416306	0.4124	chr18_63263288_G_C_b38
UKB_2395_4_Hair_or_balding_pattern_Pattern_4	region272	ColonTransverse	cg01206723	0.880718	0.9997	chr2_238787252_C_G_b38
UKB_2395_4_Hair_or_balding_pattern_Pattern_4	region272	ColonTransverse	cg24618169	0.806598	0.9794	chr2_238787252_C_G_b38
UKB_2395_4_Hair_or_balding_pattern_Pattern_4	region741	ColonTransverse	cg08877521	0.384938	0.3315	chr6_170138053_C_G_b38
UKB_2395_4_Hair_or_balding_pattern_Pattern_4	region741	ColonTransverse	cg13824877	0.436837	0.3734	chr6_170138127_T_C_b38
UKB_2395_4_Hair_or_balding_pattern_Pattern_4	region1086	KidneyCortex	cg20435097	0.59482	0.6252	chr10_124648491_T_C_b38
UKB_2395_4_Hair_or_balding_pattern_Pattern_4	region175	KidneyCortex	cg12294361	0.825649	0.7602	chr2_67649832_T_C_b38
UKB_2395_4_Hair_or_balding_pattern_Pattern_4	region896	KidneyCortex	cg14595683	0.425793	0.6183	chr8_76676481_A_G_b38
UKB_2395_4_Hair_or_balding_pattern_Pattern_4	region1369	Lung	cg01695643	0.311178	0.302	chr14_94770878_T_C_b38
UKB_2395_4_Hair_or_balding_pattern_Pattern_4	region143	Lung	cg01849587	0.433674	0.4869	chr2_19735272_T_G_b38
UKB_2395_4_Hair_or_balding_pattern_Pattern_4	region1441	Lung	cg01176694	0.602893	0.4637	chr16_14294893_T_C_b38
UKB_2395_4_Hair_or_balding_pattern_Pattern_4	region235	Lung	cg02778086	0.402961	0.557	chr2_170504386_C_T_b38
UKB_2395_4_Hair_or_balding_pattern_Pattern_4	region272	Lung	cg01206723	0.999834	0.9997	chr2_238787252_C_G_b38
UKB_2395_4_Hair_or_balding_pattern_Pattern_4	region272	Lung	cg02763409	0.986899	0.9997	chr2_238787252_C_G_b38
UKB_2395_4_Hair_or_balding_pattern_Pattern_4	region272	Lung	cg07075307	0.999831	0.9997	chr2_238787252_C_G_b38
UKB_2395_4_Hair_or_balding_pattern_Pattern_4	region272	Lung	cg24618169	0.999578	0.9997	chr2_238787252_C_G_b38
UKB_2395_4_Hair_or_balding_pattern_Pattern_4	region741	Lung	cg08877521	0.414525	0.3489	chr6_170138127_T_C_b38
UKB_2395_4_Hair_or_balding_pattern_Pattern_4	region1086	Ovary	cg04330884	0.491567	0.4886	chr10_124651698_C_A_b38
UKB_2395_4_Hair_or_balding_pattern_Pattern_4	region1086	Ovary	cg06081988	0.657701	0.549	chr10_124648491_T_C_b38
UKB_2395_4_Hair_or_balding_pattern_Pattern_4	region1086	Ovary	cg25498715	0.428465	0.6912	chr10_124649524_C_T_b38
UKB_2395_4_Hair_or_balding_pattern_Pattern_4	region1195	Ovary	cg26453462	0.507916	0.5924	chr12_26273738_A_G_b38
UKB_2395_4_Hair_or_balding_pattern_Pattern_4	region1209	Ovary	cg25570745	0.353842	0.4665	chr12_52555091_C_T_b38
UKB_2395_4_Hair_or_balding_pattern_Pattern_4	region1369	Ovary	cg01695643	0.370266	0.3416	chr14_94770878_T_C_b38
UKB_2395_4_Hair_or_balding_pattern_Pattern_4	region1409	Ovary	cg25095184	0.638827	0.6068	chr15_69751044_G_A_b38
UKB_2395_4_Hair_or_balding_pattern_Pattern_4	region143	Ovary	cg01849587	0.612052	0.5313	chr2_19733619_A_T_b38
UKB_2395_4_Hair_or_balding_pattern_Pattern_4	region175	Ovary	cg12294361	0.78002	0.702	chr2_67649832_T_C_b38
UKB_2395_4_Hair_or_balding_pattern_Pattern_4	region235	Ovary	cg02778086	0.408108	0.612	chr2_170504386_C_T_b38
UKB_2395_4_Hair_or_balding_pattern_Pattern_4	region272	Ovary	cg11886545	0.60666	0.5143	chr2_238787252_C_G_b38
UKB_2395_4_Hair_or_balding_pattern_Pattern_4	region32	Ovary	cg17814615	0.419421	0.5821	chr1_53550680_C_T_b38
UKB_2395_4_Hair_or_balding_pattern_Pattern_4	region466	Ovary	cg00100420	0.332263	0.3973	chr4_105089276_C_T_b38
UKB_2395_4_Hair_or_balding_pattern_Pattern_4	region741	Ovary	cg12207953	0.500677	0.3981	chr6_170138127_T_C_b38
UKB_2395_4_Hair_or_balding_pattern_Pattern_4	region741	Ovary	cg14218838	0.30229	0.3524	chr6_170138053_C_G_b38
UKB_2395_4_Hair_or_balding_pattern_Pattern_4	region74	Ovary	cg24449914	0.467364	0.5454	chr1_152116368_A_G_b38
UKB_2395_4_Hair_or_balding_pattern_Pattern_4	region827	Ovary	cg01499591	0.795188	0.7551	chr7_140525950_G_A_b38
UKB_2395_4_Hair_or_balding_pattern_Pattern_4	region1409	Prostate	cg25095184	0.614313	0.5959	chr15_69751044_G_A_b38
UKB_2395_4_Hair_or_balding_pattern_Pattern_4	region1668	Prostate	cg02488385	0.725192	0.4431	chr21_34835870_G_A_b38
UKB_2395_4_Hair_or_balding_pattern_Pattern_4	region235	Prostate	cg02778086	0.658134	0.5945	chr2_170504386_C_T_b38
UKB_2395_4_Hair_or_balding_pattern_Pattern_4	region272	Prostate	cg07075307	0.681151	0.5446	chr2_238787252_C_G_b38
UKB_2395_4_Hair_or_balding_pattern_Pattern_4	region272	Prostate	cg24618169	0.640792	0.6281	chr2_238787252_C_G_b38
UKB_2395_4_Hair_or_balding_pattern_Pattern_4	region238	WholeBlood	cg05604158	0.596735	0.66	chr2_176931438_T_C_b38
UKB_2395_4_Hair_or_balding_pattern_Pattern_4	region741	WholeBlood	cg08877521	0.30798	0.4051	chr6_170138127_T_C_b38
UKB_2395_4_Hair_or_balding_pattern_Pattern_4	region741	WholeBlood	cg13824877	0.444334	0.441	chr6_170138127_T_C_b38
UKB_2395_4_Hair_or_balding_pattern_Pattern_4	region742	WholeBlood	cg03226526	0.850622	0.7755	chr7_493715_G_C_b38
UKB_50_Standing_height	region1355	BreastMammaryTissue	cg19526562	0.638142	0.6164	chr14_74519700_T_C_b38
UKB_50_Standing_height	region1374	BreastMammaryTissue	cg15542309	0.467005	0.4738	chr14_102508929_G_A_b38
UKB_50_Standing_height	region1428	BreastMammaryTissue	cg08100221	0.867884	0.885	chr16_733864_C_A_b38
UKB_50_Standing_height	region1428	BreastMammaryTissue	cg27144592	0.890401	0.885	chr16_733864_C_A_b38
UKB_50_Standing_height	region1482	BreastMammaryTissue	cg02972607	0.660336	0.631	chr17_1023500_G_A_b38
UKB_50_Standing_height	region283	BreastMammaryTissue	cg17712333	0.985727	1	chr3_9933702_C_G_b38
UKB_50_Standing_height	region283	BreastMammaryTissue	cg20530843	0.908042	1	chr3_9933702_C_G_b38
UKB_50_Standing_height	region0	ColonTransverse	cg13100600	0.626468	0.4862	chr1_1022868_A_G_b38
UKB_50_Standing_height	region0	ColonTransverse	cg17801765	0.79061	0.7149	chr1_1022868_A_G_b38
UKB_50_Standing_height	region0	ColonTransverse	cg19813362	0.673088	0.6462	chr1_1023573_A_G_b38
UKB_50_Standing_height	region1007	ColonTransverse	cg01071644	0.471731	0.3167	chr9_136242628_T_C_b38
UKB_50_Standing_height	region1008	ColonTransverse	cg21464303	0.510477	0.4346	chr9_136725637_G_C_b38
UKB_50_Standing_height	region1018	ColonTransverse	cg05546369	0.820688	0.7874	chr10_11884445_A_G_b38
UKB_50_Standing_height	region1018	ColonTransverse	cg24393861	0.716969	0.5666	chr10_11884445_A_G_b38
UKB_50_Standing_height	region1028	ColonTransverse	cg09289102	0.650585	0.7028	chr10_27612430_G_T_b38
UKB_50_Standing_height	region1081	ColonTransverse	cg03567706	0.368961	0.3777	chr10_118755322_G_A_b38
UKB_50_Standing_height	region1081	ColonTransverse	cg25205705	0.539037	0.3963	chr10_118755322_G_A_b38
UKB_50_Standing_height	region1089	ColonTransverse	cg18581292	0.357059	0.6024	chr10_129550290_C_T_b38
UKB_50_Standing_height	region1094	ColonTransverse	cg15588737	0.745681	0.8069	chr11_197337_G_A_b38
UKB_50_Standing_height	region1127	ColonTransverse	cg03735013	0.383908	0.479	chr11_61814184_G_A_b38
UKB_50_Standing_height	region1127	ColonTransverse	cg14725641	0.459646	0.4215	chr11_61814184_G_A_b38
UKB_50_Standing_height	region1127	ColonTransverse	cg15598662	0.328593	0.4693	chr11_61814184_G_A_b38
UKB_50_Standing_height	region1178	ColonTransverse	cg04427186	0.306028	0.3073	chr12_479438_A_G_b38
UKB_50_Standing_height	region1189	ColonTransverse	cg21121336	0.310634	0.4977	chr12_12703640_TAGCTA_T_b38
UKB_50_Standing_height	region11	ColonTransverse	cg10201923	0.557644	0.3038	chr1_16979534_C_A_b38
UKB_50_Standing_height	region1243	ColonTransverse	cg08884029	0.409958	0.3248	chr12_109574662_G_T_b38
UKB_50_Standing_height	region1243	ColonTransverse	cg10767677	0.33509	0.3006	chr12_109568707_A_G_b38
UKB_50_Standing_height	region1243	ColonTransverse	cg12912480	0.382167	0.3154	chr12_109573424_G_T_b38
UKB_50_Standing_height	region1243	ColonTransverse	cg13986417	0.371977	0.3248	chr12_109574662_G_T_b38
UKB_50_Standing_height	region1247	ColonTransverse	cg07211768	0.772181	0.7191	chr12_114664677_A_C_b38
UKB_50_Standing_height	region1247	ColonTransverse	cg12198432	0.742865	0.7191	chr12_114664677_A_C_b38
UKB_50_Standing_height	region1247	ColonTransverse	cg14738806	0.772181	0.7191	chr12_114664677_A_C_b38
UKB_50_Standing_height	region1247	ColonTransverse	cg26620530	0.782535	0.7191	chr12_114664677_A_C_b38
UKB_50_Standing_height	region1257	ColonTransverse	cg21344159	0.453646	0.5765	chr12_131136193_A_G_b38
UKB_50_Standing_height	region1322	ColonTransverse	cg16082336	0.697661	0.6219	chr14_21071525_C_T_b38
UKB_50_Standing_height	region132	ColonTransverse	cg11195259	0.371864	0.4506	chr2_272840_G_A_b38
UKB_50_Standing_height	region1355	ColonTransverse	cg19526562	0.696342	0.6183	chr14_74519700_T_C_b38
UKB_50_Standing_height	region1374	ColonTransverse	cg12285709	0.489821	0.4882	chr14_102508929_G_A_b38
UKB_50_Standing_height	region1374	ColonTransverse	cg15542309	0.521174	0.427	chr14_102508929_G_A_b38
UKB_50_Standing_height	region1374	ColonTransverse	cg16727416	0.450861	0.3871	chr14_102513126_C_T_b38
UKB_50_Standing_height	region137	ColonTransverse	cg07026619	0.309262	0.8638	chr2_10059474_A_G_b38
UKB_50_Standing_height	region137	ColonTransverse	cg08043960	0.309986	0.5176	chr2_10056450_T_G_b38
UKB_50_Standing_height	region1406	ColonTransverse	cg26665444	0.43756	0.4468	chr15_63500559_G_GT_b38
UKB_50_Standing_height	region1410	ColonTransverse	cg06730438	0.827215	0.6973	chr15_70063811_C_T_b38
UKB_50_Standing_height	region1410	ColonTransverse	cg12349571	0.437998	0.5698	chr15_70072013_G_A_b38
UKB_50_Standing_height	region1413	ColonTransverse	cg25878151	0.706629	0.6426	chr15_77015718_A_G_b38
UKB_50_Standing_height	region1428	ColonTransverse	cg07243736	0.494759	0.8949	chr16_733864_C_A_b38
UKB_50_Standing_height	region1428	ColonTransverse	cg08100221	0.902475	0.8949	chr16_733864_C_A_b38
UKB_50_Standing_height	region1428	ColonTransverse	cg27144592	0.902475	0.8949	chr16_733864_C_A_b38
UKB_50_Standing_height	region1431	ColonTransverse	cg25282292	0.98924	0.9121	chr16_4660897_T_G_b38
UKB_50_Standing_height	region1467	ColonTransverse	cg00897404	0.38874	0.3285	chr16_75148191_A_C_b38
UKB_50_Standing_height	region1469	ColonTransverse	cg10800941	0.398892	0.4052	chr16_78287802_T_A_b38
UKB_50_Standing_height	region146	ColonTransverse	cg05945668	0.690918	0.6199	chr2_25261089_T_G_b38
UKB_50_Standing_height	region1472	ColonTransverse	cg03133097	0.95264	0.9603	chr16_81545101_G_A_b38
UKB_50_Standing_height	region1479	ColonTransverse	cg19506425	0.743077	0.6764	chr16_87272064_T_C_b38
UKB_50_Standing_height	region1482	ColonTransverse	cg02972607	0.663037	0.605	chr17_1024276_A_C_b38
UKB_50_Standing_height	region1482	ColonTransverse	cg07992519	0.685956	0.652	chr17_1023500_G_A_b38
UKB_50_Standing_height	region1482	ColonTransverse	cg23180978	0.482694	0.7051	chr17_1023500_G_A_b38
UKB_50_Standing_height	region1483	ColonTransverse	cg10974383	0.792311	0.803	chr17_1767515_G_A_b38
UKB_50_Standing_height	region1488	ColonTransverse	cg12405788	0.390705	0.8369	chr17_7468613_C_T_b38
UKB_50_Standing_height	region1497	ColonTransverse	cg21504240	0.862896	0.8435	chr17_21375977_C_T_b38
UKB_50_Standing_height	region1497	ColonTransverse	cg22639895	0.828103	0.7684	chr17_21376873_T_G_b38
UKB_50_Standing_height	region1497	ColonTransverse	cg26857910	0.65032	0.7302	chr17_21376873_T_G_b38
UKB_50_Standing_height	region1504	ColonTransverse	cg17432061	0.786222	0.5782	chr17_38765943_A_G_b38
UKB_50_Standing_height	region1515	ColonTransverse	cg00023001	0.615411	0.5278	chr17_57678652_C_T_b38
UKB_50_Standing_height	region1540	ColonTransverse	cg26136497	0.303032	0.326	chr18_23155497_T_G_b38
UKB_50_Standing_height	region1576	ColonTransverse	cg26490845	0.677305	0.7821	chr18_79451175_T_C_b38
UKB_50_Standing_height	region1583	ColonTransverse	cg09985163	0.68449	0.6165	chr19_7187849_A_G_b38
UKB_50_Standing_height	region1609	ColonTransverse	cg12258179	0.416121	0.3051	chr19_48728969_G_A_b38
UKB_50_Standing_height	region1610	ColonTransverse	cg21913888	0.337055	0.3258	chr19_49584416_C_T_b38
UKB_50_Standing_height	region1623	ColonTransverse	cg26060783	0.344636	0.5504	chr20_10923051_A_C_b38
UKB_50_Standing_height	region1651	ColonTransverse	cg04632997	0.349331	0.4835	chr20_62403468_C_G_b38
UKB_50_Standing_height	region1651	ColonTransverse	cg22601191	0.391709	0.3006	chr20_62393540_A_G_b38
UKB_50_Standing_height	region1651	ColonTransverse	cg26418193	0.502563	0.5011	chr20_62403468_C_G_b38
UKB_50_Standing_height	region1663	ColonTransverse	cg20912370	0.402446	0.5714	chr21_26921481_G_A_b38
UKB_50_Standing_height	region1687	ColonTransverse	cg00539347	0.544024	0.4603	chr22_30196498_C_G_b38
UKB_50_Standing_height	region1687	ColonTransverse	cg11564601	0.544949	0.4603	chr22_30196498_C_G_b38
UKB_50_Standing_height	region201	ColonTransverse	cg20002935	0.454376	0.3328	chr2_120851419_G_A_b38
UKB_50_Standing_height	region21	ColonTransverse	cg03407907	0.56566	0.5271	chr1_36322287_G_A_b38
UKB_50_Standing_height	region21	ColonTransverse	cg03484255	0.591441	0.5605	chr1_36323945_A_G_b38
UKB_50_Standing_height	region21	ColonTransverse	cg08452766	0.608486	0.5604	chr1_36323945_A_G_b38
UKB_50_Standing_height	region21	ColonTransverse	cg15095906	0.583137	0.4957	chr1_36322287_G_A_b38
UKB_50_Standing_height	region21	ColonTransverse	cg22090115	0.460297	0.5518	chr1_36323945_A_G_b38
UKB_50_Standing_height	region22	ColonTransverse	cg04673462	0.940511	0.9172	chr1_37996149_C_T_b38
UKB_50_Standing_height	region22	ColonTransverse	cg05202204	0.940512	0.9172	chr1_37996149_C_T_b38
UKB_50_Standing_height	region22	ColonTransverse	cg09847153	0.940512	0.9172	chr1_37996149_C_T_b38
UKB_50_Standing_height	region22	ColonTransverse	cg17077180	0.940511	0.9172	chr1_37996149_C_T_b38
UKB_50_Standing_height	region22	ColonTransverse	cg26398791	0.363372	0.7616	chr1_37990219_G_C_b38
UKB_50_Standing_height	region22	ColonTransverse	cg26528311	0.59101	0.9172	chr1_37996149_C_T_b38
UKB_50_Standing_height	region22	ColonTransverse	cg26729965	0.848821	0.805	chr1_37990219_G_C_b38
UKB_50_Standing_height	region23	ColonTransverse	cg09232440	0.421028	0.4269	chr1_39491497_C_T_b38
UKB_50_Standing_height	region274	ColonTransverse	cg02021651	0.797146	0.7204	chr2_240792123_C_T_b38
UKB_50_Standing_height	region274	ColonTransverse	cg06861572	0.760582	0.7197	chr2_240792123_C_T_b38
UKB_50_Standing_height	region274	ColonTransverse	cg09969806	0.794262	0.7204	chr2_240792123_C_T_b38
UKB_50_Standing_height	region274	ColonTransverse	cg14051367	0.79718	0.7204	chr2_240792123_C_T_b38
UKB_50_Standing_height	region274	ColonTransverse	cg25942789	0.796718	0.7184	chr2_240792123_C_T_b38
UKB_50_Standing_height	region274	ColonTransverse	cg27378591	0.796758	0.7153	chr2_240792123_C_T_b38
UKB_50_Standing_height	region283	ColonTransverse	cg01274625	1	1	chr3_9933702_C_G_b38
UKB_50_Standing_height	region283	ColonTransverse	cg17712333	1	1	chr3_9933702_C_G_b38
UKB_50_Standing_height	region283	ColonTransverse	cg20530843	1	1	chr3_9933702_C_G_b38
UKB_50_Standing_height	region283	ColonTransverse	cg25145905	1	1	chr3_9933702_C_G_b38
UKB_50_Standing_height	region314	ColonTransverse	cg05401945	0.977509	0.9802	chr3_56652301_T_C_b38
UKB_50_Standing_height	region323	ColonTransverse	cg01190459	0.999993	1	chr3_72348128_A_G_b38
UKB_50_Standing_height	region323	ColonTransverse	cg04303112	0.999993	1	chr3_72348128_A_G_b38
UKB_50_Standing_height	region332	ColonTransverse	cg00779294	0.750203	0.7291	chr3_87276603_G_A_b38
UKB_50_Standing_height	region366	ColonTransverse	cg21173144	0.508995	0.4492	chr3_147364640_A_G_b38
UKB_50_Standing_height	region400	ColonTransverse	cg26966921	0.412417	0.372	chr4_1693082_T_C_b38
UKB_50_Standing_height	region407	ColonTransverse	cg11146249	0.458765	0.5465	chr4_8596971_C_T_b38
UKB_50_Standing_height	region428	ColonTransverse	cg10868668	0.508909	0.5572	chr4_38605312_C_T_b38
UKB_50_Standing_height	region516	ColonTransverse	cg03656872	0.858974	0.9312	chr4_185776340_T_C_b38
UKB_50_Standing_height	region520	ColonTransverse	cg18584368	0.642524	0.5702	chr5_314403_T_C_b38
UKB_50_Standing_height	region593	ColonTransverse	cg01191064	0.750989	0.8321	chr5_122073485_G_C_b38
UKB_50_Standing_height	region593	ColonTransverse	cg05256605	0.877458	0.8321	chr5_122073485_G_C_b38
UKB_50_Standing_height	region593	ColonTransverse	cg08623535	0.574139	0.7862	chr5_122073485_G_C_b38
UKB_50_Standing_height	region593	ColonTransverse	cg09262269	0.876925	0.8213	chr5_122073485_G_C_b38
UKB_50_Standing_height	region593	ColonTransverse	cg12580445	0.877453	0.8321	chr5_122073485_G_C_b38
UKB_50_Standing_height	region593	ColonTransverse	cg15111469	0.865251	0.8321	chr5_122073485_G_C_b38
UKB_50_Standing_height	region593	ColonTransverse	cg21215899	0.877202	0.8321	chr5_122073485_G_C_b38
UKB_50_Standing_height	region593	ColonTransverse	cg23913350	0.358275	0.6136	chr5_122073485_G_C_b38
UKB_50_Standing_height	region595	ColonTransverse	cg10452424	0.698781	0.8222	chr5_124654577_T_C_b38
UKB_50_Standing_height	region603	ColonTransverse	cg08845721	0.317024	0.3277	chr5_143397119_T_C_b38
UKB_50_Standing_height	region603	ColonTransverse	cg21177852	0.390785	0.3603	chr5_143261937_C_A_b38
UKB_50_Standing_height	region662	ColonTransverse	cg01489274	0.462385	0.3906	chr6_43041770_G_C_b38
UKB_50_Standing_height	region699	ColonTransverse	cg14246568	0.390124	0.3461	chr6_104942907_C_CAATT_b38
UKB_50_Standing_height	region714	ColonTransverse	cg08098264	0.832475	0.8341	chr6_129502466_T_C_b38
UKB_50_Standing_height	region730	ColonTransverse	cg07943832	0.419415	0.3293	chr6_155247747_A_G_b38
UKB_50_Standing_height	region737	ColonTransverse	cg06650996	0.677249	0.6033	chr6_165928382_T_C_b38
UKB_50_Standing_height	region737	ColonTransverse	cg08497330	0.567679	0.4817	chr6_165917317_TG_T_b38
UKB_50_Standing_height	region746	ColonTransverse	cg03459839	0.736811	0.6391	chr7_2762888_T_C_b38
UKB_50_Standing_height	region746	ColonTransverse	cg12102607	0.399675	0.3065	chr7_2762888_T_C_b38
UKB_50_Standing_height	region746	ColonTransverse	cg12444411	0.466393	0.6599	chr7_2762888_T_C_b38
UKB_50_Standing_height	region746	ColonTransverse	cg21143896	0.715442	0.731	chr7_2762888_T_C_b38
UKB_50_Standing_height	region746	ColonTransverse	cg23285459	0.596513	0.6995	chr7_2762888_T_C_b38
UKB_50_Standing_height	region762	ColonTransverse	cg08153160	0.515584	0.4777	chr7_23469121_AATTG_A_b38
UKB_50_Standing_height	region773	ColonTransverse	cg03639919	0.360266	0.3112	chr7_44151710_C_T_b38
UKB_50_Standing_height	region788	ColonTransverse	cg04068313	0.401954	0.3477	chr7_73890306_C_T_b38
UKB_50_Standing_height	region788	ColonTransverse	cg24342500	0.663227	0.5874	chr7_73888132_C_T_b38
UKB_50_Standing_height	region797	ColonTransverse	cg14871678	0.557202	0.8044	chr7_92620826_T_G_b38
UKB_50_Standing_height	region802	ColonTransverse	cg04621521	0.742197	0.8349	chr7_99735325_T_G_b38
UKB_50_Standing_height	region802	ColonTransverse	cg08287220	0.716099	0.8349	chr7_99735325_T_G_b38
UKB_50_Standing_height	region815	ColonTransverse	cg18358894	0.320103	0.332	chr7_122325291_A_G_b38
UKB_50_Standing_height	region860	ColonTransverse	cg19484559	0.584733	0.5296	chr8_19500785_T_G_b38
UKB_50_Standing_height	region876	ColonTransverse	cg00000321	0.408044	0.6518	chr8_41310043_C_G_b38
UKB_50_Standing_height	region876	ColonTransverse	cg14904908	0.576068	0.669	chr8_41310043_C_G_b38
UKB_50_Standing_height	region932	ColonTransverse	cg09141604	0.619929	0.5259	chr8_141314826_T_C_b38
UKB_50_Standing_height	region947	ColonTransverse	cg01400004	0.71003	0.6181	chr9_16461431_G_C_b38
UKB_50_Standing_height	region979	ColonTransverse	cg26955041	0.743138	0.8711	chr9_88258738_G_A_b38
UKB_50_Standing_height	region1059	KidneyCortex	cg08514558	0.838701	0.6172	chr10_79376373_C_A_b38
UKB_50_Standing_height	region1127	KidneyCortex	cg07689907	0.39839	0.318	chr11_61813163_C_T_b38
UKB_50_Standing_height	region12	KidneyCortex	cg11362044	0.675056	0.8094	chr1_19428536_T_C_b38
UKB_50_Standing_height	region1482	KidneyCortex	cg02972607	0.7318	0.7208	chr17_1022524_A_G_b38
UKB_50_Standing_height	region1497	KidneyCortex	cg22639895	0.611986	0.7814	chr17_21376873_T_G_b38
UKB_50_Standing_height	region1497	KidneyCortex	cg26857910	0.520284	0.7763	chr17_21376873_T_G_b38
UKB_50_Standing_height	region1676	KidneyCortex	cg19243788	0.406873	0.3273	chr21_46023567_C_T_b38
UKB_50_Standing_height	region22	KidneyCortex	cg05202204	0.929239	0.3815	chr1_37996149_C_T_b38
UKB_50_Standing_height	region22	KidneyCortex	cg09847153	0.574062	0.9194	chr1_37996149_C_T_b38
UKB_50_Standing_height	region22	KidneyCortex	cg17077180	0.704524	0.9194	chr1_37996149_C_T_b38
UKB_50_Standing_height	region22	KidneyCortex	cg26398791	0.698312	0.8721	chr1_37996149_C_T_b38
UKB_50_Standing_height	region283	KidneyCortex	cg20530843	0.924886	1	chr3_9933702_C_G_b38
UKB_50_Standing_height	region323	KidneyCortex	cg01190459	0.999966	0.9717	chr3_72348128_A_G_b38
UKB_50_Standing_height	region351	KidneyCortex	cg06696564	0.437528	0.5985	chr3_123332172_T_C_b38
UKB_50_Standing_height	region788	KidneyCortex	cg04068313	0.459696	0.3553	chr7_73890306_C_T_b38
UKB_50_Standing_height	region0	Lung	cg13100600	0.449809	0.5395	chr1_1022868_A_G_b38
UKB_50_Standing_height	region0	Lung	cg17801765	0.714755	0.6563	chr1_1022868_A_G_b38
UKB_50_Standing_height	region1008	Lung	cg13776718	0.434186	0.4119	chr9_136725637_G_C_b38
UKB_50_Standing_height	region1008	Lung	cg14547028	0.410488	0.4449	chr9_136725506_G_A_b38
UKB_50_Standing_height	region1008	Lung	cg21464303	0.429591	0.4246	chr9_136725637_G_C_b38
UKB_50_Standing_height	region1041	Lung	cg16028222	0.412134	0.4829	chr10_50993120_T_A_b38
UKB_50_Standing_height	region107	Lung	cg11732119	0.501863	0.3995	chr1_212019262_T_A_b38
UKB_50_Standing_height	region1081	Lung	cg03567706	0.544423	0.5324	chr10_118755322_G_A_b38
UKB_50_Standing_height	region1082	Lung	cg14729344	0.846235	0.8023	chr10_119370285_G_A_b38
UKB_50_Standing_height	region1122	Lung	cg05585544	0.679784	0.7336	chr11_47701960_G_A_b38
UKB_50_Standing_height	region1127	Lung	cg27386326	0.363852	0.3385	chr11_61822009_A_G_b38
UKB_50_Standing_height	region1173	Lung	cg13488811	0.45753	0.4122	chr11_128815459_A_C_b38
UKB_50_Standing_height	region1178	Lung	cg18127646	0.543526	0.3812	chr12_482134_A_G_b38
UKB_50_Standing_height	region1185	Lung	cg10021941	0.348846	0.5599	chr12_8679358_T_A_b38
UKB_50_Standing_height	region1188	Lung	cg24279017	0.400732	0.5195	chr12_11725530_C_A_b38
UKB_50_Standing_height	region1189	Lung	cg13697193	0.383032	0.5193	chr12_12700354_TTTG_T_b38
UKB_50_Standing_height	region1189	Lung	cg21300072	0.350254	0.5077	chr12_12700354_TTTG_T_b38
UKB_50_Standing_height	region1243	Lung	cg08884029	0.348965	0.3089	chr12_109573424_G_T_b38
UKB_50_Standing_height	region1243	Lung	cg12912480	0.385607	0.3451	chr12_109583648_G_A_b38
UKB_50_Standing_height	region1243	Lung	cg13986417	0.372593	0.3098	chr12_109574662_G_T_b38
UKB_50_Standing_height	region1247	Lung	cg07211768	0.752775	0.7005	chr12_114664677_A_C_b38
UKB_50_Standing_height	region1247	Lung	cg14738806	0.752856	0.7005	chr12_114664677_A_C_b38
UKB_50_Standing_height	region1247	Lung	cg26620530	0.752856	0.7005	chr12_114664677_A_C_b38
UKB_50_Standing_height	region1322	Lung	cg16082336	0.631445	0.5086	chr14_21071525_C_T_b38
UKB_50_Standing_height	region1355	Lung	cg19526562	0.673293	0.5967	chr14_74519700_T_C_b38
UKB_50_Standing_height	region1356	Lung	cg03395898	0.383843	0.5252	chr14_75981507_G_A_b38
UKB_50_Standing_height	region1374	Lung	cg15542309	0.527248	0.4659	chr14_102508929_G_A_b38
UKB_50_Standing_height	region1374	Lung	cg16727416	0.354099	0.4659	chr14_102508929_G_A_b38
UKB_50_Standing_height	region137	Lung	cg08043960	0.42906	0.508	chr2_10056450_T_G_b38
UKB_50_Standing_height	region137	Lung	cg24144317	0.448655	0.6101	chr2_10056450_T_G_b38
UKB_50_Standing_height	region137	Lung	cg25433316	0.398566	0.5274	chr2_10056450_T_G_b38
UKB_50_Standing_height	region1410	Lung	cg01666796	0.372696	0.5474	chr15_70072013_G_A_b38
UKB_50_Standing_height	region1413	Lung	cg25878151	0.684622	0.6208	chr15_77015718_A_G_b38
UKB_50_Standing_height	region1428	Lung	cg07243736	0.876314	0.8845	chr16_733864_C_A_b38
UKB_50_Standing_height	region1428	Lung	cg08100221	0.892661	0.8845	chr16_733864_C_A_b38
UKB_50_Standing_height	region1428	Lung	cg27144592	0.892661	0.8845	chr16_733864_C_A_b38
UKB_50_Standing_height	region1431	Lung	cg25282292	0.988144	0.9045	chr16_4660897_T_G_b38
UKB_50_Standing_height	region1479	Lung	cg19506425	0.720595	0.6492	chr16_87272064_T_C_b38
UKB_50_Standing_height	region1482	Lung	cg23180978	0.672927	0.7187	chr17_1022524_A_G_b38
UKB_50_Standing_height	region1483	Lung	cg10974383	0.599771	0.7462	chr17_1764380_C_T_b38
UKB_50_Standing_height	region1483	Lung	cg22513955	0.650975	0.4478	chr17_1764380_C_T_b38
UKB_50_Standing_height	region1497	Lung	cg21504240	0.669286	0.8351	chr17_21375977_C_T_b38
UKB_50_Standing_height	region1497	Lung	cg22639895	0.788714	0.7547	chr17_21376873_T_G_b38
UKB_50_Standing_height	region1497	Lung	cg26857910	0.785593	0.7543	chr17_21376873_T_G_b38
UKB_50_Standing_height	region1520	Lung	cg05767426	0.550513	0.3753	chr17_68297719_G_A_b38
UKB_50_Standing_height	region1610	Lung	cg15032314	0.340895	0.3113	chr19_49586653_T_C_b38
UKB_50_Standing_height	region1629	Lung	cg12696861	0.675104	0.5861	chr20_20086057_C_T_b38
UKB_50_Standing_height	region1671	Lung	cg19788186	0.553693	0.5945	chr21_38298850_C_A_b38
UKB_50_Standing_height	region167	Lung	cg01496110	0.631875	0.4769	chr2_55879793_C_T_b38
UKB_50_Standing_height	region1687	Lung	cg00539347	0.367445	0.4379	chr22_30196498_C_G_b38
UKB_50_Standing_height	region1687	Lung	cg11564601	0.518356	0.4379	chr22_30196498_C_G_b38
UKB_50_Standing_height	region1	Lung	cg07048210	0.379207	0.3008	chr1_2211079_A_C_b38
UKB_50_Standing_height	region21	Lung	cg03484255	0.552717	0.4732	chr1_36322287_G_A_b38
UKB_50_Standing_height	region21	Lung	cg08452766	0.478028	0.5349	chr1_36323945_A_G_b38
UKB_50_Standing_height	region21	Lung	cg15095906	0.556338	0.545	chr1_36323945_A_G_b38
UKB_50_Standing_height	region21	Lung	cg22090115	0.417805	0.5377	chr1_36323945_A_G_b38
UKB_50_Standing_height	region22	Lung	cg04673462	0.934246	0.91	chr1_37996149_C_T_b38
UKB_50_Standing_height	region22	Lung	cg05202204	0.934246	0.9099	chr1_37996149_C_T_b38
UKB_50_Standing_height	region22	Lung	cg09847153	0.934069	0.91	chr1_37996149_C_T_b38
UKB_50_Standing_height	region22	Lung	cg17077180	0.934246	0.91	chr1_37996149_C_T_b38
UKB_50_Standing_height	region22	Lung	cg20207890	0.93189	0.9095	chr1_37996149_C_T_b38
UKB_50_Standing_height	region22	Lung	cg23211176	0.673086	0.637	chr1_37996149_C_T_b38
UKB_50_Standing_height	region22	Lung	cg23427534	0.834586	0.8288	chr1_37990219_G_C_b38
UKB_50_Standing_height	region22	Lung	cg24519393	0.934242	0.91	chr1_37996149_C_T_b38
UKB_50_Standing_height	region22	Lung	cg26398791	0.786762	0.7764	chr1_37990219_G_C_b38
UKB_50_Standing_height	region22	Lung	cg26729965	0.833681	0.7905	chr1_37990219_G_C_b38
UKB_50_Standing_height	region22	Lung	cg27018070	0.602329	0.3477	chr1_37990219_G_C_b38
UKB_50_Standing_height	region23	Lung	cg09232440	0.313922	0.4049	chr1_39491497_C_T_b38
UKB_50_Standing_height	region249	Lung	cg26227840	0.467476	0.752	chr2_199458729_A_G_b38
UKB_50_Standing_height	region275	Lung	cg24828208	0.72913	0.5974	chr2_241561247_C_T_b38
UKB_50_Standing_height	region283	Lung	cg01274625	1	1	chr3_9933702_C_G_b38
UKB_50_Standing_height	region283	Lung	cg17712333	1	1	chr3_9933702_C_G_b38
UKB_50_Standing_height	region283	Lung	cg20530843	1	1	chr3_9933702_C_G_b38
UKB_50_Standing_height	region283	Lung	cg25145905	0.999786	1	chr3_9933702_C_G_b38
UKB_50_Standing_height	region28	Lung	cg14566738	0.783327	0.7945	chr1_47439883_AG_A_b38
UKB_50_Standing_height	region323	Lung	cg04303112	0.999993	1	chr3_72348128_A_G_b38
UKB_50_Standing_height	region323	Lung	cg09006487	0.829647	0.7931	chr3_72348128_A_G_b38
UKB_50_Standing_height	region332	Lung	cg00779294	0.726402	0.7109	chr3_87276603_G_A_b38
UKB_50_Standing_height	region351	Lung	cg06696564	0.656367	0.5692	chr3_123332172_T_C_b38
UKB_50_Standing_height	region491	Lung	cg02524475	0.661978	0.724	chr4_144647200_T_C_b38
UKB_50_Standing_height	region491	Lung	cg13749822	0.485526	0.6729	chr4_144647200_T_C_b38
UKB_50_Standing_height	region491	Lung	cg26621699	0.556649	0.7044	chr4_144645325_T_C_b38
UKB_50_Standing_height	region593	Lung	cg01191064	0.580659	0.8191	chr5_122073485_G_C_b38
UKB_50_Standing_height	region593	Lung	cg05256605	0.86532	0.8191	chr5_122073485_G_C_b38
UKB_50_Standing_height	region593	Lung	cg09262269	0.865396	0.8189	chr5_122073485_G_C_b38
UKB_50_Standing_height	region593	Lung	cg12580445	0.865493	0.8191	chr5_122073485_G_C_b38
UKB_50_Standing_height	region593	Lung	cg15111469	0.865238	0.8191	chr5_122073485_G_C_b38
UKB_50_Standing_height	region593	Lung	cg21215899	0.838243	0.8191	chr5_122073485_G_C_b38
UKB_50_Standing_height	region603	Lung	cg21177852	0.387144	0.3397	chr5_143261937_C_A_b38
UKB_50_Standing_height	region604	Lung	cg07876340	0.32421	0.3152	chr5_143772315_T_C_b38
UKB_50_Standing_height	region619	Lung	cg13569779	0.775595	0.5764	chr5_168829450_T_C_b38
UKB_50_Standing_height	region621	Lung	cg16278800	0.374913	0.3905	chr5_171437017_G_T_b38
UKB_50_Standing_height	region631	Lung	cg18551822	0.577301	0.3238	chr6_2119095_C_A_b38
UKB_50_Standing_height	region662	Lung	cg01489274	0.454326	0.3599	chr6_43040560_C_T_b38
UKB_50_Standing_height	region6	Lung	cg13790717	0.303326	0.3233	chr1_10213121_C_T_b38
UKB_50_Standing_height	region737	Lung	cg06650996	0.64349	0.5814	chr6_165928382_T_C_b38
UKB_50_Standing_height	region737	Lung	cg08497330	0.587061	0.5638	chr6_165916374_C_T_b38
UKB_50_Standing_height	region746	Lung	cg00947599	0.395437	0.3228	chr7_2762888_T_C_b38
UKB_50_Standing_height	region762	Lung	cg08153160	0.827767	0.9989	chr7_23469121_AATTG_A_b38
UKB_50_Standing_height	region788	Lung	cg04068313	0.376566	0.3279	chr7_73890306_C_T_b38
UKB_50_Standing_height	region788	Lung	cg24342500	0.638988	0.5653	chr7_73888132_C_T_b38
UKB_50_Standing_height	region979	Lung	cg26955041	0.715689	0.8606	chr9_88258738_G_A_b38
UKB_50_Standing_height	region1081	MuscleSkeletal	cg25205705	0.453997	0.3469	chr10_118755322_G_A_b38
UKB_50_Standing_height	region1114	MuscleSkeletal	cg04656163	0.985442	0.9799	chr11_30426451_C_T_b38
UKB_50_Standing_height	region1243	MuscleSkeletal	cg08884029	0.384898	0.3462	chr12_109574662_G_T_b38
UKB_50_Standing_height	region1428	MuscleSkeletal	cg08100221	0.905663	0.9	chr16_733864_C_A_b38
UKB_50_Standing_height	region1428	MuscleSkeletal	cg27144592	0.905663	0.9	chr16_733864_C_A_b38
UKB_50_Standing_height	region1479	MuscleSkeletal	cg19506425	0.626511	0.6923	chr16_87272064_T_C_b38
UKB_50_Standing_height	region1497	MuscleSkeletal	cg22639895	0.887641	0.8571	chr17_21375977_C_T_b38
UKB_50_Standing_height	region1497	MuscleSkeletal	cg26857910	0.809531	0.7872	chr17_21376873_T_G_b38
UKB_50_Standing_height	region22	MuscleSkeletal	cg26528311	0.844994	0.6267	chr1_37990219_G_C_b38
UKB_50_Standing_height	region274	MuscleSkeletal	cg01466615	0.346398	0.3143	chr2_240835569_A_C_b38
UKB_50_Standing_height	region428	MuscleSkeletal	cg10868668	0.391304	0.581	chr4_38605312_C_T_b38
UKB_50_Standing_height	region788	MuscleSkeletal	cg24342500	0.387575	0.6099	chr7_73888132_C_T_b38
UKB_50_Standing_height	region947	MuscleSkeletal	cg01400004	0.769769	0.7248	chr9_16461907_T_C_b38
UKB_50_Standing_height	region1008	Ovary	cg21464303	0.452106	0.4397	chr9_136725637_G_C_b38
UKB_50_Standing_height	region1018	Ovary	cg24393861	0.557867	0.5545	chr10_11862989_A_G_b38
UKB_50_Standing_height	region1047	Ovary	cg19880462	0.765951	0.8433	chr10_59709780_T_C_b38
UKB_50_Standing_height	region1066	Ovary	cg13338089	0.439619	0.4088	chr10_91277652_A_G_b38
UKB_50_Standing_height	region1091	Ovary	cg16538964	0.350653	0.3513	chr10_131944937_G_C_b38
UKB_50_Standing_height	region1094	Ovary	cg26051816	0.62578	0.5505	chr11_207359_C_CGGCCACAGCCGCCTCAGACGT_b38
UKB_50_Standing_height	region1094	Ovary	cg27107784	0.340232	0.3039	chr11_202253_G_A_b38
UKB_50_Standing_height	region1106	Ovary	cg10262997	0.565942	0.3877	chr11_18623473_C_CA_b38
UKB_50_Standing_height	region1178	Ovary	cg14907156	0.612553	0.6231	chr12_481093_G_A_b38
UKB_50_Standing_height	region1178	Ovary	cg27378312	0.620066	0.5756	chr12_481093_G_A_b38
UKB_50_Standing_height	region1188	Ovary	cg07019303	0.750678	0.3213	chr12_11725530_C_A_b38
UKB_50_Standing_height	region1243	Ovary	cg13986417	0.387282	0.3329	chr12_109574662_G_T_b38
UKB_50_Standing_height	region1247	Ovary	cg03900474	0.675547	0.8967	chr12_114670331_T_C_b38
UKB_50_Standing_height	region1247	Ovary	cg07211768	0.752906	0.7127	chr12_114664677_A_C_b38
UKB_50_Standing_height	region1247	Ovary	cg13930596	0.70164	0.8975	chr12_114670331_T_C_b38
UKB_50_Standing_height	region1247	Ovary	cg14738806	0.774495	0.7127	chr12_114664677_A_C_b38
UKB_50_Standing_height	region1247	Ovary	cg26620530	0.765011	0.7127	chr12_114664677_A_C_b38
UKB_50_Standing_height	region1322	Ovary	cg16082336	0.732079	0.5717	chr14_21071525_C_T_b38
UKB_50_Standing_height	region1324	Ovary	cg01714342	0.634191	0.7156	chr14_24365909_G_A_b38
UKB_50_Standing_height	region1428	Ovary	cg07243736	0.327557	0.8882	chr16_733864_C_A_b38
UKB_50_Standing_height	region1428	Ovary	cg08100221	0.898866	0.8912	chr16_733864_C_A_b38
UKB_50_Standing_height	region1428	Ovary	cg27144592	0.898866	0.8912	chr16_733864_C_A_b38
UKB_50_Standing_height	region1431	Ovary	cg01642579	0.482068	0.3312	chr16_4696391_T_C_b38
UKB_50_Standing_height	region1431	Ovary	cg25282292	0.979161	0.9095	chr16_4660897_T_G_b38
UKB_50_Standing_height	region1472	Ovary	cg25794430	0.497164	0.903	chr16_81545101_G_A_b38
UKB_50_Standing_height	region1479	Ovary	cg19506425	0.734772	0.6717	chr16_87272064_T_C_b38
UKB_50_Standing_height	region1482	Ovary	cg02972607	0.755183	0.7126	chr17_1022524_A_G_b38
UKB_50_Standing_height	region148	Ovary	cg04482131	0.851345	0.8763	chr2_28385637_C_T_b38
UKB_50_Standing_height	region1497	Ovary	cg21504240	0.791319	0.8053	chr17_21376873_T_G_b38
UKB_50_Standing_height	region1497	Ovary	cg22639895	0.797294	0.7658	chr17_21376873_T_G_b38
UKB_50_Standing_height	region1497	Ovary	cg26857910	0.797061	0.7655	chr17_21376873_T_G_b38
UKB_50_Standing_height	region1498	Ovary	cg27050769	0.753422	0.4418	chr17_28620458_T_G_b38
UKB_50_Standing_height	region1520	Ovary	cg05767426	0.787779	0.7358	chr17_68305422_C_T_b38
UKB_50_Standing_height	region1520	Ovary	cg08238388	0.592825	0.365	chr17_68302882_G_A_b38
UKB_50_Standing_height	region1520	Ovary	cg09560586	0.591046	0.5699	chr17_68302882_G_A_b38
UKB_50_Standing_height	region1576	Ovary	cg25595641	0.438206	0.3679	chr18_79449015_A_G_b38
UKB_50_Standing_height	region1576	Ovary	cg26490845	0.658034	0.609	chr18_79451175_T_C_b38
UKB_50_Standing_height	region1583	Ovary	cg09985163	0.674679	0.609	chr19_7187849_A_G_b38
UKB_50_Standing_height	region1606	Ovary	cg17970176	0.353594	0.3843	chr19_43536845_T_C_b38
UKB_50_Standing_height	region1606	Ovary	cg22159528	0.311695	0.3004	chr19_43558535_G_A_b38
UKB_50_Standing_height	region1609	Ovary	cg01656853	0.438347	0.3411	chr19_48715345_C_T_b38
UKB_50_Standing_height	region1609	Ovary	cg13540341	0.579163	0.3797	chr19_48722509_A_T_b38
UKB_50_Standing_height	region1609	Ovary	cg16359174	0.511308	0.5309	chr19_48722509_A_T_b38
UKB_50_Standing_height	region1609	Ovary	cg21653641	0.460558	0.5322	chr19_48722509_A_T_b38
UKB_50_Standing_height	region1610	Ovary	cg24838305	0.352955	0.3262	chr19_49586653_T_C_b38
UKB_50_Standing_height	region1671	Ovary	cg16831361	0.652053	0.7561	chr21_38299554_G_A_b38
UKB_50_Standing_height	region1671	Ovary	cg19788186	0.648946	0.6228	chr21_38298850_C_A_b38
UKB_50_Standing_height	region1687	Ovary	cg11564601	0.509157	0.4524	chr22_30196498_C_G_b38
UKB_50_Standing_height	region185	Ovary	cg25178838	0.750671	0.7369	chr2_85591674_G_A_b38
UKB_50_Standing_height	region21	Ovary	cg03484255	0.593774	0.5527	chr1_36323945_A_G_b38
UKB_50_Standing_height	region21	Ovary	cg08452766	0.582319	0.5263	chr1_36323945_A_G_b38
UKB_50_Standing_height	region229	Ovary	cg16815588	0.431608	0.4283	chr2_163591875_T_A_b38
UKB_50_Standing_height	region22	Ovary	cg04673462	0.937606	0.9147	chr1_37996149_C_T_b38
UKB_50_Standing_height	region22	Ovary	cg05202204	0.930823	0.9147	chr1_37996149_C_T_b38
UKB_50_Standing_height	region22	Ovary	cg09847153	0.896331	0.9141	chr1_37996149_C_T_b38
UKB_50_Standing_height	region22	Ovary	cg17077180	0.937654	0.9147	chr1_37996149_C_T_b38
UKB_50_Standing_height	region22	Ovary	cg18147567	0.842752	0.7387	chr1_37990219_G_C_b38
UKB_50_Standing_height	region22	Ovary	cg18176678	0.931339	0.8725	chr1_37996149_C_T_b38
UKB_50_Standing_height	region22	Ovary	cg18876826	0.514368	0.7907	chr1_37990219_G_C_b38
UKB_50_Standing_height	region22	Ovary	cg26528311	0.898348	0.9147	chr1_37996149_C_T_b38
UKB_50_Standing_height	region22	Ovary	cg26729965	0.879753	0.8001	chr1_37990219_G_C_b38
UKB_50_Standing_height	region233	Ovary	cg08763941	0.4098	0.3373	chr2_168851042_A_G_b38
UKB_50_Standing_height	region23	Ovary	cg10475635	0.389704	0.35	chr1_39482552_A_G_b38
UKB_50_Standing_height	region274	Ovary	cg09969806	0.517259	0.5742	chr2_240795337_T_C_b38
UKB_50_Standing_height	region283	Ovary	cg01274625	1	1	chr3_9933702_C_G_b38
UKB_50_Standing_height	region283	Ovary	cg01906662	0.399664	1	chr3_9933702_C_G_b38
UKB_50_Standing_height	region283	Ovary	cg03776870	0.421397	0.9998	chr3_9933702_C_G_b38
UKB_50_Standing_height	region283	Ovary	cg12325049	0.952322	0.9973	chr3_9933702_C_G_b38
UKB_50_Standing_height	region283	Ovary	cg16444126	0.999667	1	chr3_9933702_C_G_b38
UKB_50_Standing_height	region283	Ovary	cg17712333	1	1	chr3_9933702_C_G_b38
UKB_50_Standing_height	region283	Ovary	cg20530843	1	1	chr3_9933702_C_G_b38
UKB_50_Standing_height	region283	Ovary	cg25145905	0.970713	1	chr3_9933702_C_G_b38
UKB_50_Standing_height	region323	Ovary	cg01190459	0.999992	1	chr3_72348128_A_G_b38
UKB_50_Standing_height	region332	Ovary	cg00779294	0.710543	0.7229	chr3_87276603_G_A_b38
UKB_50_Standing_height	region345	Ovary	cg24572745	0.373383	0.3637	chr3_113110595_G_A_b38
UKB_50_Standing_height	region366	Ovary	cg26108171	0.4582	0.3897	chr3_147364640_A_G_b38
UKB_50_Standing_height	region595	Ovary	cg22562003	0.837311	0.8029	chr5_124654577_T_C_b38
UKB_50_Standing_height	region601	Ovary	cg23573900	0.32224	0.3406	chr5_139584461_C_CAAAT_b38
UKB_50_Standing_height	region621	Ovary	cg16278800	0.711704	0.9059	chr5_171437017_G_T_b38
UKB_50_Standing_height	region737	Ovary	cg06650996	0.707852	0.6108	chr6_165919840_T_TC_b38
UKB_50_Standing_height	region737	Ovary	cg08497330	0.599717	0.5343	chr6_165920311_A_G_b38
UKB_50_Standing_height	region745	Ovary	cg12150100	0.773289	0.3116	chr7_2721301_T_C_b38
UKB_50_Standing_height	region746	Ovary	cg01498219	0.572146	0.68	chr7_2762888_T_C_b38
UKB_50_Standing_height	region746	Ovary	cg01839603	0.55031	0.6676	chr7_2762888_T_C_b38
UKB_50_Standing_height	region746	Ovary	cg23249868	0.43972	0.6974	chr7_2762888_T_C_b38
UKB_50_Standing_height	region762	Ovary	cg08153160	0.87746	0.9989	chr7_23469121_AATTG_A_b38
[truncated: 7,753 more rows]
[truncated: 1 more columns]

## Sheet: eQTL-GWAS colocalization result
GWAS	LD block	QTL_Tissue	eGene	coloc_PP4	fastenloc_RCP	fastenloc_SNP
UKB_1160_Sleep_duration	region198	Lung	ENSG00000234997	0.462292	0.8997	chr2_113325543_A_G_b38
UKB_1160_Sleep_duration	region198	Lung	ENSG00000272563	0.417207	0.7857	chr2_113325543_A_G_b38
UKB_1180_Morning_or_evening_person_chronotype	region1355	BreastMammaryTissue	ENSG00000205659	0.400581	0.529	chr14_74085267_G_C_b38
UKB_1180_Morning_or_evening_person_chronotype	region1202	ColonTransverse	ENSG00000257718	0.499699	0.3602	chr12_38905901_C_T_b38
UKB_1180_Morning_or_evening_person_chronotype	region1355	MuscleSkeletal	ENSG00000205659	0.325243	0.5262	chr14_74085267_G_C_b38
UKB_1180_Morning_or_evening_person_chronotype	region1355	Testis	ENSG00000205659	0.503249	0.6486	chr14_74203190_G_A_b38
UKB_1180_Morning_or_evening_person_chronotype	region12	WholeBlood	ENSG00000158748	0.319371	0.6397	chr1_19688246_C_T_b38
UKB_1180_Morning_or_evening_person_chronotype	region804	WholeBlood	ENSG00000170667	0.786787	0.6544	chr7_102743216_T_A_b38
UKB_1200_Sleeplessness_or_insomnia	region1273	Lung	ENSG00000120697	0.529983	0.8218	chr13_36968779_C_T_b38
UKB_1200_Sleeplessness_or_insomnia	region198	Lung	ENSG00000184492	0.526961	0.4311	chr2_113325543_A_G_b38
UKB_1200_Sleeplessness_or_insomnia	region198	Lung	ENSG00000234997	0.738223	0.9116	chr2_113325543_A_G_b38
UKB_1200_Sleeplessness_or_insomnia	region198	Lung	ENSG00000272563	0.707254	0.8108	chr2_113325543_A_G_b38
UKB_1200_Sleeplessness_or_insomnia	region1273	MuscleSkeletal	ENSG00000120697	0.579616	0.7427	chr13_36973123_A_T_b38
UKB_1200_Sleeplessness_or_insomnia	region1508	MuscleSkeletal	ENSG00000267288	0.448225	0.5696	chr17_45173286_A_G_b38
UKB_1200_Sleeplessness_or_insomnia	region310	MuscleSkeletal	ENSG00000185614	0.530286	0.3436	chr3_49823421_T_C_b38
UKB_1200_Sleeplessness_or_insomnia	region743	MuscleSkeletal	ENSG00000146540	0.352873	0.4394	chr7_1022891_G_A_b38
UKB_1200_Sleeplessness_or_insomnia	region1073	Testis	ENSG00000107882	0.549967	0.6379	chr10_102508869_T_C_b38
UKB_1200_Sleeplessness_or_insomnia	region1073	Testis	ENSG00000138111	0.645186	0.861	chr10_102469616_A_AG_b38
UKB_1200_Sleeplessness_or_insomnia	region1273	Testis	ENSG00000102710	0.56544	0.6211	chr13_36991814_C_T_b38
UKB_1200_Sleeplessness_or_insomnia	region310	WholeBlood	ENSG00000004534	0.395801	0.5237	chr3_49934081_C_A_b38
UKB_1807_Fathers_age_at_death	region1414	Testis	ENSG00000261762	0.384422	0.6077	chr15_78590583_G_A_b38
UKB_20002_1094_self_reported_deep_venous_thrombosis_dvt	region517	Lung	ENSG00000088926	0.385391	0.7111	chr4_186271327_T_C_b38
UKB_20002_1094_self_reported_deep_venous_thrombosis_dvt	region517	Lung	ENSG00000251165	0.323182	0.7182	chr4_186270633_G_A_b38
UKB_20002_1094_self_reported_deep_venous_thrombosis_dvt	region1004	Testis	ENSG00000175164	0.365799	0.4041	chr9_133261662_G_A_b38
UKB_20002_1094_self_reported_deep_venous_thrombosis_dvt	region1004	WholeBlood	ENSG00000175164	0.556061	0.5391	chr9_133269015_C_T_b38
UKB_20002_1111_self_reported_asthma	region1504	ColonTransverse	ENSG00000073605	0.790809	0.8659	chr17_39900944_G_A_b38
UKB_20002_1111_self_reported_asthma	region1608	ColonTransverse	ENSG00000185800	0.533962	0.6274	chr19_45805458_A_G_b38
UKB_20002_1111_self_reported_asthma	region5	Lung	ENSG00000142599	0.312016	0.464	chr1_8444361_C_A_b38
UKB_20002_1111_self_reported_asthma	region5	Lung	ENSG00000232912	0.330936	0.4208	chr1_8424763_A_G_b38
UKB_20002_1111_self_reported_asthma	region1127	MuscleSkeletal	ENSG00000134825	0.326784	0.4419	chr11_61783884_T_C_b38
UKB_20002_1111_self_reported_asthma	region1127	MuscleSkeletal	ENSG00000168496	0.358679	0.4456	chr11_61790354_T_C_b38
UKB_20002_1111_self_reported_asthma	region1508	MuscleSkeletal	ENSG00000006062	0.746072	0.8949	chr17_45281874_A_G_b38
UKB_20002_1111_self_reported_asthma	region598	MuscleSkeletal	ENSG00000197536	0.473143	0.6901	chr5_132452642_A_C_b38
UKB_20002_1111_self_reported_asthma	region1127	Ovary	ENSG00000134825	0.359239	0.4111	chr11_61801834_C_G_b38
UKB_20002_1111_self_reported_asthma	region1067	Prostate	ENSG00000236493	0.410065	0.8414	chr10_92669710_C_T_b38
UKB_20002_1111_self_reported_asthma	region1127	Prostate	ENSG00000149485	0.379643	0.5276	chr11_61828850_CA_C_b38
UKB_20002_1111_self_reported_asthma	region1608	Prostate	ENSG00000104936	0.37623	0.4716	chr19_45782104_G_GC_b38
UKB_20002_1111_self_reported_asthma	region1067	Testis	ENSG00000152804	0.358377	0.3799	chr10_92669710_C_T_b38
UKB_20002_1111_self_reported_asthma	region584	Testis	ENSG00000248428	0.999807	0.9983	chr5_111066174_T_C_b38
UKB_20002_1111_self_reported_asthma	region102	WholeBlood	ENSG00000133048	0.469889	0.7698	chr1_203131901_G_A_b38
UKB_20002_1111_self_reported_asthma	region102	WholeBlood	ENSG00000133055	0.455496	0.7872	chr1_203131901_G_A_b38
UKB_20002_1111_self_reported_asthma	region102	WholeBlood	ENSG00000133063	0.406062	0.7896	chr1_203119254_G_T_b38
UKB_20002_1111_self_reported_asthma	region102	WholeBlood	ENSG00000143847	0.39245	0.457	chr1_203089348_C_T_b38
UKB_20002_1111_self_reported_asthma	region102	WholeBlood	ENSG00000163485	0.496038	0.7875	chr1_203119486_G_A_b38
UKB_20002_1111_self_reported_asthma	region1127	WholeBlood	ENSG00000134824	0.429596	0.7653	chr11_61825533_A_G_b38
UKB_20002_1111_self_reported_asthma	region1129	WholeBlood	ENSG00000172638	0.499762	0.7463	chr11_65895248_C_T_b38
UKB_20002_1111_self_reported_asthma	region1408	WholeBlood	ENSG00000103591	0.738838	0.3906	chr15_67163292_C_T_b38
UKB_20002_1111_self_reported_asthma	region5	WholeBlood	ENSG00000232912	0.327984	0.5385	chr1_8424763_A_G_b38
UKB_20002_1111_self_reported_asthma	region984	WholeBlood	ENSG00000106799	0.963136	0.5764	chr9_99170243_A_G_b38
UKB_20002_1111_self_reported_asthma	region99	WholeBlood	ENSG00000236278	0.366068	0.6879	chr1_198684045_A_G_b38
UKB_20002_1226_self_reported_hypothyroidism_or_myxoedema	region1376	BreastMammaryTissue	ENSG00000211897	0.365666	0.6024	chr14_105769791_T_A_b38
UKB_20002_1226_self_reported_hypothyroidism_or_myxoedema	region1463	BreastMammaryTissue	ENSG00000159708	0.394598	0.6076	chr16_67327331_T_C_b38
UKB_20002_1226_self_reported_hypothyroidism_or_myxoedema	region1463	BreastMammaryTissue	ENSG00000168676	0.384356	0.5582	chr16_67327331_T_C_b38
UKB_20002_1226_self_reported_hypothyroidism_or_myxoedema	region1506	BreastMammaryTissue	ENSG00000089558	0.453051	0.3183	chr17_42144905_G_A_b38
UKB_20002_1226_self_reported_hypothyroidism_or_myxoedema	region1581	BreastMammaryTissue	ENSG00000127666	0.827862	0.3592	chr19_4832350_T_C_b38
UKB_20002_1226_self_reported_hypothyroidism_or_myxoedema	region167	BreastMammaryTissue	ENSG00000272606	0.343827	0.6083	chr2_55618108_ATAAGTT_A_b38
UKB_20002_1226_self_reported_hypothyroidism_or_myxoedema	region738	BreastMammaryTissue	ENSG00000026297	0.641978	0.7574	chr6_166956742_T_C_b38
UKB_20002_1226_self_reported_hypothyroidism_or_myxoedema	region886	BreastMammaryTissue	ENSG00000104388	0.30001	0.5212	chr8_60515641_C_T_b38
UKB_20002_1226_self_reported_hypothyroidism_or_myxoedema	region1072	ColonTransverse	ENSG00000228778	0.312141	0.4731	chr10_99526738_A_G_b38
UKB_20002_1226_self_reported_hypothyroidism_or_myxoedema	region1072	ColonTransverse	ENSG00000257582	0.308055	0.4573	chr10_99527227_C_T_b38
UKB_20002_1226_self_reported_hypothyroidism_or_myxoedema	region1085	ColonTransverse	ENSG00000254636	0.656353	0.754	chr10_122429681_A_G_b38
UKB_20002_1226_self_reported_hypothyroidism_or_myxoedema	region1506	ColonTransverse	ENSG00000089558	0.719924	0.6922	chr17_42137394_T_C_b38
UKB_20002_1226_self_reported_hypothyroidism_or_myxoedema	region658	ColonTransverse	ENSG00000112041	0.424392	0.4462	chr6_35552996_G_T_b38
UKB_20002_1226_self_reported_hypothyroidism_or_myxoedema	region803	ColonTransverse	ENSG00000146830	0.633802	0.7393	chr7_100688351_A_C_b38
UKB_20002_1226_self_reported_hypothyroidism_or_myxoedema	region886	ColonTransverse	ENSG00000104388	0.302159	0.409	chr8_60513412_G_A_b38
UKB_20002_1226_self_reported_hypothyroidism_or_myxoedema	region1376	Lung	ENSG00000211892	0.366322	0.4326	chr14_105772740_G_A_b38
UKB_20002_1226_self_reported_hypothyroidism_or_myxoedema	region1376	Lung	ENSG00000211897	0.383438	0.4662	chr14_105773531_C_G_b38
UKB_20002_1226_self_reported_hypothyroidism_or_myxoedema	region1376	Lung	ENSG00000253755	0.314991	0.3782	chr14_105765831_T_G_b38
UKB_20002_1226_self_reported_hypothyroidism_or_myxoedema	region1463	Lung	ENSG00000168676	0.378132	0.4241	chr16_67327331_T_C_b38
UKB_20002_1226_self_reported_hypothyroidism_or_myxoedema	region657	Lung	ENSG00000227057	0.470342	0.42	chr6_33286888_A_G_b38
UKB_20002_1226_self_reported_hypothyroidism_or_myxoedema	region803	Lung	ENSG00000146830	0.62195	0.7139	chr7_100689872_C_G_b38
UKB_20002_1226_self_reported_hypothyroidism_or_myxoedema	region1085	MuscleSkeletal	ENSG00000107679	0.670816	0.7036	chr10_122380251_G_A_b38
UKB_20002_1226_self_reported_hypothyroidism_or_myxoedema	region1212	MuscleSkeletal	ENSG00000111540	0.595969	0.6276	chr12_55981956_C_A_b38
UKB_20002_1226_self_reported_hypothyroidism_or_myxoedema	region1212	MuscleSkeletal	ENSG00000139531	0.409938	0.3289	chr12_55999553_C_G_b38
UKB_20002_1226_self_reported_hypothyroidism_or_myxoedema	region1687	MuscleSkeletal	ENSG00000128342	0.675621	0.6504	chr22_30196498_C_G_b38
UKB_20002_1226_self_reported_hypothyroidism_or_myxoedema	region77	MuscleSkeletal	ENSG00000027869	0.622376	0.7384	chr1_156815987_G_A_b38
UKB_20002_1226_self_reported_hypothyroidism_or_myxoedema	region1610	Ovary	ENSG00000169169	0.59934	0.6792	chr19_49691142_G_C_b38
UKB_20002_1226_self_reported_hypothyroidism_or_myxoedema	region803	Prostate	ENSG00000146830	0.573639	0.7095	chr7_100687290_C_G_b38
UKB_20002_1226_self_reported_hypothyroidism_or_myxoedema	region0	Testis	ENSG00000127054	0.378338	0.4098	chr1_1330125_G_A_b38
UKB_20002_1226_self_reported_hypothyroidism_or_myxoedema	region1568	Testis	ENSG00000150637	0.335435	0.3759	chr18_69869381_T_C_b38
UKB_20002_1226_self_reported_hypothyroidism_or_myxoedema	region1610	Testis	ENSG00000169169	0.618156	0.6015	chr19_49691142_G_C_b38
UKB_20002_1226_self_reported_hypothyroidism_or_myxoedema	region167	Testis	ENSG00000272606	0.363143	0.3567	chr2_55618108_ATAAGTT_A_b38
UKB_20002_1226_self_reported_hypothyroidism_or_myxoedema	region251	Testis	ENSG00000163599	0.584225	0.3726	chr2_203874196_G_A_b38
UKB_20002_1226_self_reported_hypothyroidism_or_myxoedema	region855	Testis	ENSG00000170983	0.321072	0.4105	chr8_11576400_T_C_b38
UKB_20002_1226_self_reported_hypothyroidism_or_myxoedema	region1376	WholeBlood	ENSG00000211896	0.31439	0.5651	chr14_105742782_T_C_b38
UKB_20002_1226_self_reported_hypothyroidism_or_myxoedema	region1376	WholeBlood	ENSG00000211897	0.428551	0.6898	chr14_105769806_G_A_b38
UKB_20002_1226_self_reported_hypothyroidism_or_myxoedema	region1463	WholeBlood	ENSG00000159720	0.566184	0.8147	chr16_67442669_A_G_b38
UKB_20002_1226_self_reported_hypothyroidism_or_myxoedema	region1487	WholeBlood	ENSG00000072818	0.905459	0.9719	chr17_7337072_C_T_b38
UKB_20002_1226_self_reported_hypothyroidism_or_myxoedema	region1568	WholeBlood	ENSG00000206052	0.55252	0.7361	chr18_69851843_C_T_b38
UKB_20002_1226_self_reported_hypothyroidism_or_myxoedema	region584	WholeBlood	ENSG00000152495	0.994379	0.999	chr5_111230662_C_T_b38
UKB_20002_1226_self_reported_hypothyroidism_or_myxoedema	region803	WholeBlood	ENSG00000146830	0.580605	0.8377	chr7_100693577_C_T_b38
UKB_20002_1265_self_reported_migraine	region1095	WholeBlood	ENSG00000184350	0.759423	0.8499	chr11_3237292_C_G_b38
UKB_20002_1452_self_reported_eczema_or_dermatitis	region1375	MuscleSkeletal	ENSG00000131323	0.668627	0.4953	chr14_102777071_A_G_b38
UKB_20002_1452_self_reported_eczema_or_dermatitis	region598	Testis	ENSG00000169194	0.917286	0.5821	chr5_132660753_A_G_b38
UKB_20002_1452_self_reported_eczema_or_dermatitis	region1375	WholeBlood	ENSG00000131323	0.784718	0.5801	chr14_102777071_A_G_b38
UKB_20002_1453_self_reported_psoriasis	region703	BreastMammaryTissue	ENSG00000255389	0.991292	0.992	chr6_111608659_G_T_b38
UKB_20002_1453_self_reported_psoriasis	region703	ColonTransverse	ENSG00000255389	0.987879	0.9946	chr6_111608659_G_T_b38
UKB_20002_1453_self_reported_psoriasis	region703	KidneyCortex	ENSG00000255389	0.77921	0.9567	chr6_111592059_C_T_b38
UKB_20002_1453_self_reported_psoriasis	region703	Lung	ENSG00000255389	0.937223	0.9946	chr6_111608659_G_T_b38
UKB_20002_1453_self_reported_psoriasis	region703	MuscleSkeletal	ENSG00000255389	0.990459	0.9961	chr6_111608659_G_T_b38
UKB_20002_1453_self_reported_psoriasis	region703	Ovary	ENSG00000255389	0.986692	0.9981	chr6_111608659_G_T_b38
UKB_20002_1453_self_reported_psoriasis	region703	Testis	ENSG00000255389	0.978114	0.9936	chr6_111608659_G_T_b38
UKB_20002_1463_self_reported_ulcerative_colitis	region1671	Lung	ENSG00000205622	0.681418	0.4463	chr21_39094542_G_A_b38
UKB_20002_1463_self_reported_ulcerative_colitis	region1671	WholeBlood	ENSG00000157557	0.787043	0.8923	chr21_39092998_G_C_b38
UKB_20002_1463_self_reported_ulcerative_colitis	region1671	WholeBlood	ENSG00000232837	0.757674	0.7106	chr21_39095717_T_C_b38
UKB_20002_1463_self_reported_ulcerative_colitis	region1671	WholeBlood	ENSG00000235888	0.739514	0.9042	chr21_39095717_T_C_b38
UKB_20002_1463_self_reported_ulcerative_colitis	region1671	WholeBlood	ENSG00000237721	0.793517	0.9182	chr21_39094373_G_T_b38
UKB_20002_1464_self_reported_rheumatoid_arthritis	region552	WholeBlood	ENSG00000164512	0.370056	0.5476	chr5_56148856_G_A_b38
UKB_20002_1466_self_reported_gout	region1419	MuscleSkeletal	ENSG00000259685	0.673357	0.3227	chr15_90102986_C_T_b38
UKB_20002_1473_self_reported_high_cholesterol	region1653	BreastMammaryTissue	ENSG00000237371	0.391919	0.5965	chr20_64060707_A_C_b38
UKB_20002_1473_self_reported_high_cholesterol	region66	BreastMammaryTissue	ENSG00000134222	0.823424	0.4429	chr1_109274968_G_T_b38
UKB_20002_1473_self_reported_high_cholesterol	region158	ColonTransverse	ENSG00000138075	0.390545	0.6039	chr2_43847292_C_T_b38
UKB_20002_1473_self_reported_high_cholesterol	region158	ColonTransverse	ENSG00000143921	0.632849	0.765	chr2_43847292_C_T_b38
UKB_20002_1473_self_reported_high_cholesterol	region1653	ColonTransverse	ENSG00000171700	0.638486	0.5707	chr20_64080106_C_T_b38
UKB_20002_1473_self_reported_high_cholesterol	region1609	Lung	ENSG00000142233	0.313072	0.6252	chr19_48706207_C_A_b38
UKB_20002_1473_self_reported_high_cholesterol	region1653	Lung	ENSG00000171700	0.826019	0.9007	chr20_64080106_C_T_b38
UKB_20002_1473_self_reported_high_cholesterol	region834	Lung	ENSG00000164867	0.641757	0.9102	chr7_150993088_C_T_b38
UKB_20002_1473_self_reported_high_cholesterol	region1609	MuscleSkeletal	ENSG00000142233	0.339957	0.5755	chr19_48710247_G_A_b38
UKB_20002_1473_self_reported_high_cholesterol	region251	MuscleSkeletal	ENSG00000273456	0.374204	0.6592	chr2_202376031_T_TGCCCACCGCA_b38
UKB_20002_1473_self_reported_high_cholesterol	region655	MuscleSkeletal	ENSG00000204387	0.832904	0.7024	chr6_31913954_G_A_b38
UKB_20002_1473_self_reported_high_cholesterol	region66	MuscleSkeletal	ENSG00000143126	0.964238	0.7252	chr1_109274570_A_G_b38
UKB_20002_1473_self_reported_high_cholesterol	region1653	Ovary	ENSG00000125510	0.463793	0.5052	chr20_64080106_C_T_b38
UKB_20002_1473_self_reported_high_cholesterol	region1653	Prostate	ENSG00000171700	0.705602	0.6566	chr20_64080106_C_T_b38
UKB_20002_1473_self_reported_high_cholesterol	region251	Prostate	ENSG00000273456	0.389118	0.6084	chr2_202376031_T_TGCCCACCGCA_b38
UKB_20002_1473_self_reported_high_cholesterol	region66	Prostate	ENSG00000134222	0.801938	0.5214	chr1_109274968_G_T_b38
UKB_20002_1473_self_reported_high_cholesterol	region1653	Testis	ENSG00000171700	0.883828	0.7999	chr20_64080106_C_T_b38
UKB_20002_1473_self_reported_high_cholesterol	region1523	WholeBlood	ENSG00000132478	0.709539	0.8975	chr17_75782435_CA_C_b38
UKB_20002_1473_self_reported_high_cholesterol	region251	WholeBlood	ENSG00000273456	0.311675	0.6667	chr2_202376031_T_TGCCCACCGCA_b38
UKB_20002_1473_self_reported_high_cholesterol	region66	WholeBlood	ENSG00000134222	0.338164	0.5559	chr1_109275908_C_T_b38
UKB_20016_Fluid_intelligence_score	region1656	BreastMammaryTissue	ENSG00000154640	0.38554	0.6267	chr21_17650512_G_A_b38
UKB_20016_Fluid_intelligence_score	region228	BreastMammaryTissue	ENSG00000227403	0.981946	0.9954	chr2_161244750_G_A_b38
UKB_20016_Fluid_intelligence_score	region19	ColonTransverse	ENSG00000162517	0.301913	0.5591	chr1_31640893_A_G_b38
UKB_20016_Fluid_intelligence_score	region228	ColonTransverse	ENSG00000227403	0.976819	0.9958	chr2_161244750_G_A_b38
UKB_20016_Fluid_intelligence_score	region228	KidneyCortex	ENSG00000227403	0.988802	0.9964	chr2_161244750_G_A_b38
UKB_20016_Fluid_intelligence_score	region1656	Lung	ENSG00000154640	0.766916	0.767	chr21_17660631_G_C_b38
UKB_20016_Fluid_intelligence_score	region1208	MuscleSkeletal	ENSG00000169884	0.31594	0.6863	chr12_49008516_G_C_b38
UKB_20016_Fluid_intelligence_score	region1208	MuscleSkeletal	ENSG00000181418	0.394776	0.7642	chr12_49006722_A_C_b38
UKB_20016_Fluid_intelligence_score	region151	MuscleSkeletal	ENSG00000276517	0.316972	0.4497	chr2_32525812_G_A_b38
UKB_20016_Fluid_intelligence_score	region228	MuscleSkeletal	ENSG00000136560	0.377382	0.7246	chr2_161150919_C_G_b38
UKB_20016_Fluid_intelligence_score	region228	Prostate	ENSG00000227403	0.97936	0.9958	chr2_161244750_G_A_b38
UKB_20016_Fluid_intelligence_score	region228	Testis	ENSG00000227403	0.984703	0.9953	chr2_161244750_G_A_b38
UKB_20016_Fluid_intelligence_score	region311	Testis	ENSG00000242142	0.356827	0.6281	chr3_53067764_T_C_b38
UKB_20016_Fluid_intelligence_score	region1456	WholeBlood	ENSG00000166971	0.378275	0.7465	chr16_53502433_C_T_b38
UKB_20016_Fluid_intelligence_score	region228	WholeBlood	ENSG00000227403	0.985692	0.9953	chr2_161244750_G_A_b38
UKB_20022_Birth_weight	region1054	BreastMammaryTissue	ENSG00000156510	0.773602	0.8723	chr10_69220168_A_T_b38
UKB_20022_Birth_weight	region1067	BreastMammaryTissue	ENSG00000236493	0.389557	0.5726	chr10_92670150_T_C_b38
UKB_20022_Birth_weight	region1085	BreastMammaryTissue	ENSG00000107679	0.704739	0.806	chr10_122368927_C_T_b38
UKB_20022_Birth_weight	region1419	BreastMammaryTissue	ENSG00000182511	0.336044	0.4904	chr15_90884642_G_C_b38
UKB_20022_Birth_weight	region1487	BreastMammaryTissue	ENSG00000170291	0.537885	0.328	chr17_7257205_A_C_b38
UKB_20022_Birth_weight	region1649	BreastMammaryTissue	ENSG00000254419	0.675746	0.6278	chr20_58711005_C_G_b38
UKB_20022_Birth_weight	region1686	BreastMammaryTissue	ENSG00000183762	0.526717	0.713	chr22_29076896_T_C_b38
UKB_20022_Birth_weight	region311	BreastMammaryTissue	ENSG00000163933	0.517729	0.6798	chr3_53077688_T_C_b38
UKB_20022_Birth_weight	region311	BreastMammaryTissue	ENSG00000242142	0.565966	0.743	chr3_53069139_C_T_b38
UKB_20022_Birth_weight	region715	BreastMammaryTissue	ENSG00000198945	0.448123	0.6515	chr6_130053316_T_A_b38
UKB_20022_Birth_weight	region876	BreastMammaryTissue	ENSG00000029534	0.693047	0.8381	chr8_41665840_A_G_b38
UKB_20022_Birth_weight	region1067	ColonTransverse	ENSG00000236493	0.438014	0.5421	chr10_92670740_A_C_b38
UKB_20022_Birth_weight	region1419	ColonTransverse	ENSG00000182511	0.340255	0.5608	chr15_90885291_CT_C_b38
UKB_20022_Birth_weight	region1487	ColonTransverse	ENSG00000170291	0.563924	0.7076	chr17_7251215_G_A_b38
UKB_20022_Birth_weight	region1487	ColonTransverse	ENSG00000181885	0.309188	0.3977	chr17_7263613_T_TG_b38
UKB_20022_Birth_weight	region1634	ColonTransverse	ENSG00000149600	0.318237	0.5014	chr20_32739337_C_G_b38
UKB_20022_Birth_weight	region1649	ColonTransverse	ENSG00000215440	0.743233	0.4468	chr20_58699095_G_C_b38
UKB_20022_Birth_weight	region311	ColonTransverse	ENSG00000163933	0.515499	0.6866	chr3_53077688_T_C_b38
UKB_20022_Birth_weight	region311	ColonTransverse	ENSG00000242142	0.515715	0.7097	chr3_53077688_T_C_b38
UKB_20022_Birth_weight	region715	ColonTransverse	ENSG00000198945	0.443086	0.6599	chr6_130053316_T_A_b38
UKB_20022_Birth_weight	region746	ColonTransverse	ENSG00000146535	0.325202	0.3604	chr7_2818242_T_C_b38
UKB_20022_Birth_weight	region876	ColonTransverse	ENSG00000029534	0.498183	0.7539	chr8_41670710_G_C_b38
UKB_20022_Birth_weight	region715	KidneyCortex	ENSG00000198945	0.446084	0.5864	chr6_130053316_T_A_b38
UKB_20022_Birth_weight	region1054	Lung	ENSG00000156502	0.714124	0.8519	chr10_69216160_C_T_b38
UKB_20022_Birth_weight	region1067	Lung	ENSG00000236493	0.37168	0.5626	chr10_92670740_A_C_b38
UKB_20022_Birth_weight	region1085	Lung	ENSG00000107679	0.569017	0.7811	chr10_122383113_T_C_b38
UKB_20022_Birth_weight	region1419	Lung	ENSG00000182511	0.303144	0.5445	chr15_90885291_CT_C_b38
UKB_20022_Birth_weight	region1487	Lung	ENSG00000072778	0.482564	0.689	chr17_7213534_C_A_b38
UKB_20022_Birth_weight	region1487	Lung	ENSG00000170291	0.366046	0.556	chr17_7251215_G_A_b38
UKB_20022_Birth_weight	region1613	Lung	ENSG00000186152	0.626973	0.3588	chr19_54219953_G_A_b38
UKB_20022_Birth_weight	region311	Lung	ENSG00000163933	0.470115	0.6941	chr3_53077688_T_C_b38
UKB_20022_Birth_weight	region311	Lung	ENSG00000163935	0.467002	0.6672	chr3_53069780_G_T_b38
UKB_20022_Birth_weight	region311	Lung	ENSG00000242142	0.46388	0.6751	chr3_53077688_T_C_b38
UKB_20022_Birth_weight	region715	Lung	ENSG00000198945	0.398997	0.6439	chr6_130053316_T_A_b38
UKB_20022_Birth_weight	region746	Lung	ENSG00000146535	0.418438	0.6087	chr7_2756248_T_G_b38
UKB_20022_Birth_weight	region1487	MuscleSkeletal	ENSG00000132535	0.739429	0.4014	chr17_7261244_C_T_b38
UKB_20022_Birth_weight	region1487	MuscleSkeletal	ENSG00000170291	0.667083	0.7731	chr17_7251215_G_A_b38
UKB_20022_Birth_weight	region1487	MuscleSkeletal	ENSG00000181885	0.763014	0.8487	chr17_7263613_T_TG_b38
UKB_20022_Birth_weight	region311	MuscleSkeletal	ENSG00000163933	0.571647	0.7371	chr3_53088241_T_C_b38
UKB_20022_Birth_weight	region311	MuscleSkeletal	ENSG00000242142	0.632171	0.7575	chr3_53069780_G_T_b38
UKB_20022_Birth_weight	region715	MuscleSkeletal	ENSG00000198945	0.378842	0.4432	chr6_130053316_T_A_b38
UKB_20022_Birth_weight	region876	MuscleSkeletal	ENSG00000029534	0.720876	0.8378	chr8_41667170_C_T_b38
UKB_20022_Birth_weight	region1085	Ovary	ENSG00000107679	0.511852	0.6916	chr10_122371251_CAT_C_b38
UKB_20022_Birth_weight	region311	Ovary	ENSG00000163933	0.654079	0.8128	chr3_53097756_T_C_b38
UKB_20022_Birth_weight	region311	Ovary	ENSG00000163935	0.568642	0.7339	chr3_53072031_T_C_b38
UKB_20022_Birth_weight	region311	Ovary	ENSG00000242142	0.489413	0.7123	chr3_53075336_A_G_b38
UKB_20022_Birth_weight	region311	Prostate	ENSG00000163933	0.563013	0.7743	chr3_53093661_G_T_b38
UKB_20022_Birth_weight	region311	Prostate	ENSG00000242142	0.607403	0.76	chr3_53073553_G_A_b38
UKB_20022_Birth_weight	region715	Prostate	ENSG00000198945	0.432559	0.6403	chr6_130053316_T_A_b38
UKB_20022_Birth_weight	region1067	Testis	ENSG00000236493	0.422726	0.5627	chr10_92670740_A_C_b38
UKB_20022_Birth_weight	region1079	Testis	ENSG00000043591	0.87605	0.9464	chr10_114039136_A_G_b38
UKB_20022_Birth_weight	region137	Testis	ENSG00000151694	0.584546	0.6678	chr2_9546311_A_G_b38
UKB_20022_Birth_weight	region1487	Testis	ENSG00000132535	0.509962	0.5435	chr17_7219921_T_TGGGCGTGCAGGACGC_b38
UKB_20022_Birth_weight	region1487	Testis	ENSG00000170291	0.621548	0.7476	chr17_7251215_G_A_b38
UKB_20022_Birth_weight	region1487	Testis	ENSG00000175826	0.609831	0.7076	chr17_7251215_G_A_b38
UKB_20022_Birth_weight	region1581	Testis	ENSG00000127663	0.781416	0.8002	chr19_4969188_A_C_b38
UKB_20022_Birth_weight	region1581	Testis	ENSG00000276043	0.6124	0.6709	chr19_4911784_C_T_b38
UKB_20022_Birth_weight	region311	Testis	ENSG00000163933	0.498643	0.6203	chr3_53077688_T_C_b38
UKB_20022_Birth_weight	region715	Testis	ENSG00000198945	0.428834	0.5858	chr6_130053316_T_A_b38
UKB_20022_Birth_weight	region996	Testis	ENSG00000119403	0.877816	0.9265	chr9_120870551_G_C_b38
UKB_20022_Birth_weight	region996	Testis	ENSG00000226752	0.396307	0.4239	chr9_120856693_A_G_b38
UKB_20022_Birth_weight	region1054	WholeBlood	ENSG00000156502	0.702525	0.8506	chr10_69216141_C_T_b38
UKB_20022_Birth_weight	region1054	WholeBlood	ENSG00000156510	0.761515	0.9082	chr10_69223185_C_T_b38
UKB_20022_Birth_weight	region1067	WholeBlood	ENSG00000236493	0.38822	0.6604	chr10_92670740_A_C_b38
UKB_20022_Birth_weight	region1074	WholeBlood	ENSG00000076685	0.488341	0.6551	chr10_103204136_C_T_b38
UKB_20022_Birth_weight	region1074	WholeBlood	ENSG00000148842	0.896898	0.959	chr10_103138228_T_C_b38
UKB_20022_Birth_weight	region1487	WholeBlood	ENSG00000072778	0.589831	0.8103	chr17_7219921_T_TGGGCGTGCAGGACGC_b38
UKB_20022_Birth_weight	region1487	WholeBlood	ENSG00000170291	0.526376	0.7275	chr17_7251215_G_A_b38
UKB_20022_Birth_weight	region1581	WholeBlood	ENSG00000205784	0.433635	0.6737	chr19_4915329_G_A_b38
UKB_20022_Birth_weight	region1613	WholeBlood	ENSG00000186152	0.917701	0.9872	chr19_54219677_C_T_b38
UKB_20022_Birth_weight	region1613	WholeBlood	ENSG00000204577	0.411454	0.4392	chr19_54219677_C_T_b38
UKB_20022_Birth_weight	region1649	WholeBlood	ENSG00000254419	0.826275	0.843	chr20_58711005_C_G_b38
UKB_20022_Birth_weight	region311	WholeBlood	ENSG00000163933	0.496291	0.7253	chr3_53077688_T_C_b38
UKB_20022_Birth_weight	region311	WholeBlood	ENSG00000242142	0.482434	0.7291	chr3_53077688_T_C_b38
UKB_20022_Birth_weight	region649	WholeBlood	ENSG00000276966	0.745215	0.8912	chr6_26206947_C_A_b38
UKB_20022_Birth_weight	region715	WholeBlood	ENSG00000198945	0.390543	0.6691	chr6_130053316_T_A_b38
UKB_20127_Neuroticism_score	region1693	BreastMammaryTissue	ENSG00000128272	0.362968	0.4915	chr22_39520621_T_TC_b38
UKB_20127_Neuroticism_score	region1693	ColonTransverse	ENSG00000128272	0.388551	0.5621	chr22_39517277_T_G_b38
UKB_20127_Neuroticism_score	region1504	MuscleSkeletal	ENSG00000008838	0.464962	0.6929	chr17_40057402_A_G_b38
UKB_20127_Neuroticism_score	region1693	MuscleSkeletal	ENSG00000128272	0.332047	0.4718	chr22_39520621_T_TC_b38
UKB_20127_Neuroticism_score	region854	Prostate	ENSG00000255310	0.305286	0.3558	chr8_11115230_C_A_b38
UKB_20127_Neuroticism_score	region1693	WholeBlood	ENSG00000128272	0.303945	0.3727	chr22_39512739_T_C_b38
UKB_21001_Body_mass_index_BMI	region0	BreastMammaryTissue	ENSG00000189339	0.566737	0.7883	chr1_1665061_C_T_b38
UKB_21001_Body_mass_index_BMI	region1091	BreastMammaryTissue	ENSG00000151640	0.355076	0.634	chr10_132187458_G_A_b38
UKB_21001_Body_mass_index_BMI	region1506	BreastMammaryTissue	ENSG00000198863	0.548231	0.3018	chr17_42933666_A_G_b38
UKB_21001_Body_mass_index_BMI	region789	BreastMammaryTissue	ENSG00000170092	0.378398	0.6344	chr7_75472161_C_T_b38
UKB_21001_Body_mass_index_BMI	region0	ColonTransverse	ENSG00000189339	0.487274	0.6957	chr1_1669613_G_A_b38
UKB_21001_Body_mass_index_BMI	region0	ColonTransverse	ENSG00000248333	0.445559	0.6955	chr1_1668717_C_G_b38
UKB_21001_Body_mass_index_BMI	region1080	ColonTransverse	ENSG00000225302	0.461062	0.736	chr10_116891485_C_T_b38
UKB_21001_Body_mass_index_BMI	region1086	ColonTransverse	ENSG00000273599	0.527044	0.8058	chr10_124995565_T_C_b38
UKB_21001_Body_mass_index_BMI	region1091	ColonTransverse	ENSG00000151640	0.343813	0.6239	chr10_132187458_G_A_b38
UKB_21001_Body_mass_index_BMI	region1122	ColonTransverse	ENSG00000172247	0.339853	0.5758	chr11_47589600_C_T_b38
UKB_21001_Body_mass_index_BMI	region1465	ColonTransverse	ENSG00000102967	0.338826	0.3447	chr16_72004760_C_T_b38
UKB_21001_Body_mass_index_BMI	region790	ColonTransverse	ENSG00000241350	0.416806	0.4016	chr7_77009438_C_A_b38
UKB_21001_Body_mass_index_BMI	region0	KidneyCortex	ENSG00000189339	0.536421	0.6147	chr1_1669613_G_A_b38
UKB_21001_Body_mass_index_BMI	region0	KidneyCortex	ENSG00000227775	0.561975	0.6552	chr1_1665581_C_G_b38
UKB_21001_Body_mass_index_BMI	region1129	KidneyCortex	ENSG00000172543	0.614132	0.6117	chr11_65873435_C_T_b38
UKB_21001_Body_mass_index_BMI	region0	Lung	ENSG00000189339	0.598837	0.7688	chr1_1665061_C_T_b38
UKB_21001_Body_mass_index_BMI	region1091	Lung	ENSG00000151640	0.392736	0.6029	chr10_132187458_G_A_b38
UKB_21001_Body_mass_index_BMI	region1486	Lung	ENSG00000205710	0.933334	0.504	chr17_4897868_C_A_b38
UKB_21001_Body_mass_index_BMI	region1591	Lung	ENSG00000105662	0.351629	0.5197	chr19_18704801_T_C_b38
UKB_21001_Body_mass_index_BMI	region1672	Lung	ENSG00000255568	0.437632	0.3778	chr21_39311814_A_G_b38
UKB_21001_Body_mass_index_BMI	region309	Lung	ENSG00000068745	0.570005	0.7392	chr3_48658401_T_C_b38
UKB_21001_Body_mass_index_BMI	region655	Lung	ENSG00000204472	0.552094	0.4018	chr6_31624141_A_T_b38
UKB_21001_Body_mass_index_BMI	region0	MuscleSkeletal	ENSG00000189339	0.633542	0.8093	chr1_1665061_C_T_b38
UKB_21001_Body_mass_index_BMI	region0	MuscleSkeletal	ENSG00000189339	0.800376	0.9054	chr1_1659060_G_A_b38
UKB_21001_Body_mass_index_BMI	region0	MuscleSkeletal	ENSG00000227775	0.418152	0.7731	chr1_1665581_C_G_b38
UKB_21001_Body_mass_index_BMI	region1094	MuscleSkeletal	ENSG00000177697	0.623333	0.8314	chr11_840363_C_T_b38
UKB_21001_Body_mass_index_BMI	region1122	MuscleSkeletal	ENSG00000172247	0.340182	0.6004	chr11_47600860_G_A_b38
UKB_21001_Body_mass_index_BMI	region1164	MuscleSkeletal	ENSG00000271751	0.32322	0.5348	chr11_119066807_T_C_b38
UKB_21001_Body_mass_index_BMI	region1174	MuscleSkeletal	ENSG00000254842	0.491706	0.6895	chr11_130879456_TAG_T_b38
UKB_21001_Body_mass_index_BMI	region309	MuscleSkeletal	ENSG00000068745	0.680932	0.638	chr3_48694054_G_T_b38
UKB_21001_Body_mass_index_BMI	region0	Ovary	ENSG00000189339	0.607506	0.721	chr1_1665061_C_T_b38
UKB_21001_Body_mass_index_BMI	region0	Ovary	ENSG00000227775	0.531631	0.6661	chr1_1665581_C_G_b38
UKB_21001_Body_mass_index_BMI	region789	Ovary	ENSG00000170092	0.343067	0.45	chr7_75472161_C_T_b38
UKB_21001_Body_mass_index_BMI	region0	Prostate	ENSG00000189339	0.572239	0.7296	chr1_1665581_C_G_b38
UKB_21001_Body_mass_index_BMI	region1610	Prostate	ENSG00000235034	0.362547	0.4741	chr19_50627652_G_A_b38
UKB_21001_Body_mass_index_BMI	region790	Prostate	ENSG00000241350	0.304859	0.5652	chr7_77010522_A_G_b38
UKB_21001_Body_mass_index_BMI	region1091	Testis	ENSG00000151640	0.32127	0.5008	chr10_132187458_G_A_b38
UKB_21001_Body_mass_index_BMI	region1431	Testis	ENSG00000262888	0.718814	0.5571	chr16_3965728_C_T_b38
UKB_21001_Body_mass_index_BMI	region654	Testis	ENSG00000234745	0.319917	0.8116	chr6_31358545_T_G_b38
UKB_21001_Body_mass_index_BMI	region0	WholeBlood	ENSG00000189339	0.616322	0.8	chr1_1665061_C_T_b38
UKB_21001_Body_mass_index_BMI	region0	WholeBlood	ENSG00000227775	0.577139	0.7735	chr1_1665581_C_G_b38
UKB_21001_Body_mass_index_BMI	region1406	WholeBlood	ENSG00000140455	0.404547	0.6292	chr15_63500058_T_C_b38
UKB_21001_Body_mass_index_BMI	region655	WholeBlood	ENSG00000204463	0.982335	0.8585	chr6_31624141_A_T_b38
UKB_21001_Body_mass_index_BMI	region790	WholeBlood	ENSG00000233448	0.35627	0.3809	chr7_77010522_A_G_b38
UKB_23099_Body_fat_percentage	region0	BreastMammaryTissue	ENSG00000189339	0.378352	0.6635	chr1_1665061_C_T_b38
UKB_23099_Body_fat_percentage	region1091	BreastMammaryTissue	ENSG00000151640	0.436563	0.4568	chr10_132187458_G_A_b38
UKB_23099_Body_fat_percentage	region1506	BreastMammaryTissue	ENSG00000108785	0.719887	0.9123	chr17_42546057_A_G_b38
UKB_23099_Body_fat_percentage	region227	BreastMammaryTissue	ENSG00000115221	0.367974	0.5594	chr2_160265623_A_G_b38
UKB_23099_Body_fat_percentage	region597	BreastMammaryTissue	ENSG00000245937	0.662965	0.8797	chr5_128070567_G_T_b38
UKB_23099_Body_fat_percentage	region5	BreastMammaryTissue	ENSG00000232912	0.317753	0.5789	chr1_8424763_A_G_b38
UKB_23099_Body_fat_percentage	region65	BreastMammaryTissue	ENSG00000198890	0.314945	0.6157	chr1_107056636_A_T_b38
UKB_23099_Body_fat_percentage	region789	BreastMammaryTissue	ENSG00000170092	0.496422	0.738	chr7_75472161_C_T_b38
UKB_23099_Body_fat_percentage	region92	BreastMammaryTissue	ENSG00000116406	0.304146	0.5243	chr1_184737078_GT_G_b38
UKB_23099_Body_fat_percentage	region0	ColonTransverse	ENSG00000189339	0.3954	0.6343	chr1_1668717_C_G_b38
UKB_23099_Body_fat_percentage	region0	ColonTransverse	ENSG00000248333	0.378127	0.6448	chr1_1668717_C_G_b38
UKB_23099_Body_fat_percentage	region1080	ColonTransverse	ENSG00000188316	0.341165	0.5851	chr10_116891485_C_T_b38
UKB_23099_Body_fat_percentage	region1080	ColonTransverse	ENSG00000225302	0.69118	0.8707	chr10_116891485_C_T_b38
UKB_23099_Body_fat_percentage	region1091	ColonTransverse	ENSG00000151640	0.381448	0.4284	chr10_132187458_G_A_b38
UKB_23099_Body_fat_percentage	region1122	ColonTransverse	ENSG00000172247	0.350897	0.6483	chr11_47589600_C_T_b38
UKB_23099_Body_fat_percentage	region1591	ColonTransverse	ENSG00000130517	0.310723	0.5482	chr19_18341385_C_T_b38
UKB_23099_Body_fat_percentage	region1653	ColonTransverse	ENSG00000203896	0.450108	0.6815	chr20_63740795_G_C_b38
UKB_23099_Body_fat_percentage	region92	ColonTransverse	ENSG00000116406	0.378612	0.6144	chr1_184711947_A_G_b38
UKB_23099_Body_fat_percentage	region981	ColonTransverse	ENSG00000131668	0.425365	0.4956	chr9_93698731_G_A_b38
UKB_23099_Body_fat_percentage	region0	KidneyCortex	ENSG00000189339	0.401352	0.5584	chr1_1668717_C_G_b38
UKB_23099_Body_fat_percentage	region0	KidneyCortex	ENSG00000227775	0.431178	0.5909	chr1_1665581_C_G_b38
UKB_23099_Body_fat_percentage	region552	KidneyCortex	ENSG00000164512	0.310874	0.4206	chr5_56520065_A_G_b38
UKB_23099_Body_fat_percentage	region0	Lung	ENSG00000189339	0.410591	0.6237	chr1_1665061_C_T_b38
UKB_23099_Body_fat_percentage	region1486	Lung	ENSG00000205710	0.921879	0.6236	chr17_4897868_C_A_b38
UKB_23099_Body_fat_percentage	region1503	Lung	ENSG00000278535	0.313977	0.5751	chr17_36588163_G_A_b38
UKB_23099_Body_fat_percentage	region1591	Lung	ENSG00000130517	0.425826	0.4931	chr19_18344847_T_C_b38
UKB_23099_Body_fat_percentage	region1672	Lung	ENSG00000255568	0.300298	0.3291	chr21_39311814_A_G_b38
UKB_23099_Body_fat_percentage	region19	Lung	ENSG00000235790	0.414027	0.5395	chr1_31733498_G_T_b38
UKB_23099_Body_fat_percentage	region597	Lung	ENSG00000245937	0.649265	0.6647	chr5_128053152_G_A_b38
UKB_23099_Body_fat_percentage	region5	Lung	ENSG00000142599	0.341903	0.5537	chr1_8444361_C_A_b38
UKB_23099_Body_fat_percentage	region5	Lung	ENSG00000232912	0.58426	0.8008	chr1_8424763_A_G_b38
UKB_23099_Body_fat_percentage	region65	Lung	ENSG00000198890	0.330562	0.5772	chr1_107056636_A_T_b38
UKB_23099_Body_fat_percentage	region92	Lung	ENSG00000116406	0.386626	0.5864	chr1_184737078_GT_G_b38
UKB_23099_Body_fat_percentage	region0	MuscleSkeletal	ENSG00000189339	0.425392	0.6907	chr1_1665061_C_T_b38
UKB_23099_Body_fat_percentage	region0	MuscleSkeletal	ENSG00000189339	0.726603	0.8823	chr1_1659060_G_A_b38
UKB_23099_Body_fat_percentage	region1057	MuscleSkeletal	ENSG00000079393	0.625384	0.8206	chr10_75091693_A_G_b38
UKB_23099_Body_fat_percentage	region1122	MuscleSkeletal	ENSG00000172247	0.339864	0.7574	chr11_47644134_G_A_b38
UKB_23099_Body_fat_percentage	region1164	MuscleSkeletal	ENSG00000271751	0.34052	0.6244	chr11_119066807_T_C_b38
UKB_23099_Body_fat_percentage	region1164	MuscleSkeletal	ENSG00000272186	0.335186	0.6539	chr11_119067724_G_A_b38
UKB_23099_Body_fat_percentage	region1174	MuscleSkeletal	ENSG00000254842	0.888563	0.9508	chr11_130879456_TAG_T_b38
UKB_23099_Body_fat_percentage	region1210	MuscleSkeletal	ENSG00000172789	0.330534	0.6291	chr12_54027640_AT_A_b38
UKB_23099_Body_fat_percentage	region1210	MuscleSkeletal	ENSG00000197757	0.377803	0.6409	chr12_54026992_G_C_b38
UKB_23099_Body_fat_percentage	region1210	MuscleSkeletal	ENSG00000198353	0.347899	0.4644	chr12_54039227_G_C_b38
UKB_23099_Body_fat_percentage	region1503	MuscleSkeletal	ENSG00000278311	0.388708	0.4666	chr17_36544793_G_A_b38
UKB_23099_Body_fat_percentage	region1506	MuscleSkeletal	ENSG00000108786	0.689678	0.9011	chr17_42546057_A_G_b38
UKB_23099_Body_fat_percentage	region1653	MuscleSkeletal	ENSG00000203896	0.318065	0.5995	chr20_63740795_G_C_b38
UKB_23099_Body_fat_percentage	region437	MuscleSkeletal	ENSG00000134851	0.501721	0.7638	chr4_55398586_C_G_b38
UKB_23099_Body_fat_percentage	region597	MuscleSkeletal	ENSG00000245937	0.712424	0.7709	chr5_128053152_G_A_b38
UKB_23099_Body_fat_percentage	region5	MuscleSkeletal	ENSG00000232912	0.74582	0.864	chr1_8424763_A_G_b38
UKB_23099_Body_fat_percentage	region65	MuscleSkeletal	ENSG00000198890	0.359327	0.6668	chr1_107056636_A_T_b38
UKB_23099_Body_fat_percentage	region864	MuscleSkeletal	ENSG00000147454	0.738386	0.8963	chr8_23529679_C_T_b38
UKB_23099_Body_fat_percentage	region92	MuscleSkeletal	ENSG00000116406	0.370849	0.6364	chr1_184737078_GT_G_b38
UKB_23099_Body_fat_percentage	region0	Ovary	ENSG00000189339	0.388342	0.5202	chr1_1665061_C_T_b38
UKB_23099_Body_fat_percentage	region0	Ovary	ENSG00000227775	0.383718	0.5229	chr1_1665581_C_G_b38
UKB_23099_Body_fat_percentage	region1591	Ovary	ENSG00000130517	0.329233	0.4806	chr19_18350146_G_A_b38
UKB_23099_Body_fat_percentage	region789	Ovary	ENSG00000170092	0.41594	0.5002	chr7_75472161_C_T_b38
UKB_23099_Body_fat_percentage	region0	Prostate	ENSG00000189339	0.389522	0.6132	chr1_1665581_C_G_b38
UKB_23099_Body_fat_percentage	region1309	Prostate	ENSG00000231194	0.324637	0.442	chr13_98466746_T_G_b38
UKB_23099_Body_fat_percentage	region1653	Prostate	ENSG00000203896	0.329448	0.5695	chr20_63738996_T_C_b38
UKB_23099_Body_fat_percentage	region597	Prostate	ENSG00000245937	0.626176	0.7749	chr5_128070567_G_T_b38
UKB_23099_Body_fat_percentage	region789	Prostate	ENSG00000170092	0.317326	0.4772	chr7_75472161_C_T_b38
UKB_23099_Body_fat_percentage	region92	Prostate	ENSG00000116406	0.324142	0.4865	chr1_184737078_GT_G_b38
UKB_23099_Body_fat_percentage	region1077	Testis	ENSG00000203867	0.6381	0.3318	chr10_110773038_G_A_b38
UKB_23099_Body_fat_percentage	region1091	Testis	ENSG00000151640	0.322472	0.3659	chr10_132187458_G_A_b38
UKB_23099_Body_fat_percentage	region1431	Testis	ENSG00000262888	0.75048	0.6087	chr16_3965728_C_T_b38
UKB_23099_Body_fat_percentage	region597	Testis	ENSG00000245937	0.6247	0.7913	chr5_128070567_G_T_b38
UKB_23099_Body_fat_percentage	region0	WholeBlood	ENSG00000189339	0.406818	0.6384	chr1_1665061_C_T_b38
UKB_23099_Body_fat_percentage	region0	WholeBlood	ENSG00000227775	0.398574	0.639	chr1_1665581_C_G_b38
UKB_23099_Body_fat_percentage	region1020	WholeBlood	ENSG00000165626	0.376148	0.6819	chr10_13527805_C_T_b38
UKB_23099_Body_fat_percentage	region1101	WholeBlood	ENSG00000254554	0.323586	0.5776	chr11_10303778_C_A_b38
UKB_23099_Body_fat_percentage	region1266	WholeBlood	ENSG00000122033	0.351445	0.4641	chr13_27429225_C_G_b38
UKB_23099_Body_fat_percentage	region1451	WholeBlood	ENSG00000099377	0.445146	0.6269	chr16_30999862_A_G_b38
UKB_23099_Body_fat_percentage	region1653	WholeBlood	ENSG00000203896	0.408391	0.6265	chr20_63738996_T_C_b38
UKB_23099_Body_fat_percentage	region5	WholeBlood	ENSG00000142599	0.527294	0.7398	chr1_8437247_T_A_b38
UKB_23099_Body_fat_percentage	region5	WholeBlood	ENSG00000232912	0.473933	0.7739	chr1_8424763_A_G_b38
UKB_23099_Body_fat_percentage	region649	WholeBlood	ENSG00000276966	0.448288	0.3499	chr6_26206947_C_A_b38
UKB_23099_Body_fat_percentage	region65	WholeBlood	ENSG00000198890	0.306633	0.581	chr1_107056636_A_T_b38
UKB_23099_Body_fat_percentage	region764	WholeBlood	ENSG00000078399	0.959188	0.9754	chr7_27162670_A_G_b38
UKB_23099_Body_fat_percentage	region789	WholeBlood	ENSG00000127957	0.338489	0.4824	chr7_75515270_T_C_b38
UKB_2395_4_Hair_or_balding_pattern_Pattern_4	region1086	BreastMammaryTissue	ENSG00000233334	0.632249	0.5455	chr10_124666560_C_T_b38
UKB_2395_4_Hair_or_balding_pattern_Pattern_4	region1419	BreastMammaryTissue	ENSG00000140575	0.979543	0.9841	chr15_90466252_G_A_b38
UKB_2395_4_Hair_or_balding_pattern_Pattern_4	region361	BreastMammaryTissue	ENSG00000177311	0.324423	0.5041	chr3_141406344_A_G_b38
UKB_2395_4_Hair_or_balding_pattern_Pattern_4	region622	BreastMammaryTissue	ENSG00000174705	0.803873	0.6916	chr5_172426154_G_A_b38
UKB_2395_4_Hair_or_balding_pattern_Pattern_4	region1419	ColonTransverse	ENSG00000140575	0.971133	0.9912	chr15_90466252_G_A_b38
UKB_2395_4_Hair_or_balding_pattern_Pattern_4	region622	ColonTransverse	ENSG00000174705	0.419361	0.4793	chr5_172426154_G_A_b38
UKB_2395_4_Hair_or_balding_pattern_Pattern_4	region630	ColonTransverse	ENSG00000137265	0.528621	0.4021	chr6_421281_G_A_b38
UKB_2395_4_Hair_or_balding_pattern_Pattern_4	region1419	Lung	ENSG00000140575	0.984083	0.9911	chr15_90466252_G_A_b38
UKB_2395_4_Hair_or_balding_pattern_Pattern_4	region622	Lung	ENSG00000174705	0.873154	0.9146	chr5_172426154_G_A_b38
UKB_2395_4_Hair_or_balding_pattern_Pattern_4	region235	MuscleSkeletal	ENSG00000204335	0.575495	0.4618	chr2_170504386_C_T_b38
UKB_2395_4_Hair_or_balding_pattern_Pattern_4	region622	MuscleSkeletal	ENSG00000174705	0.900021	0.941	chr5_172426154_G_A_b38
UKB_2395_4_Hair_or_balding_pattern_Pattern_4	region1419	Testis	ENSG00000140575	0.765287	0.6378	chr15_90466252_G_A_b38
UKB_2395_4_Hair_or_balding_pattern_Pattern_4	region1419	WholeBlood	ENSG00000140575	0.988947	0.9939	chr15_90466252_G_A_b38
UKB_2395_4_Hair_or_balding_pattern_Pattern_4	region1428	WholeBlood	ENSG00000103126	0.53865	0.9515	chr16_360178_G_A_b38
UKB_2395_4_Hair_or_balding_pattern_Pattern_4	region361	WholeBlood	ENSG00000177311	0.370362	0.529	chr3_141386728_A_G_b38
UKB_2395_4_Hair_or_balding_pattern_Pattern_4	region369	WholeBlood	ENSG00000198829	0.707133	0.5378	chr3_151944166_G_A_b38
UKB_50_Standing_height	region1004	BreastMammaryTissue	ENSG00000169925	0.38949	0.6789	chr9_134069081_G_A_b38
UKB_50_Standing_height	region1008	BreastMammaryTissue	ENSG00000233016	0.713247	0.8995	chr9_136727975_G_GGCCCCCATCCCGCGGCTCGC_b38
UKB_50_Standing_height	region1106	BreastMammaryTissue	ENSG00000179119	0.39915	0.5687	chr11_18634515_G_C_b38
UKB_50_Standing_height	region1185	BreastMammaryTissue	ENSG00000166532	0.596975	0.8437	chr12_8679358_T_A_b38
UKB_50_Standing_height	region1419	BreastMammaryTissue	ENSG00000140575	0.301292	0.6412	chr15_90466252_G_A_b38
UKB_50_Standing_height	region1483	BreastMammaryTissue	ENSG00000132386	0.653605	0.6739	chr17_1764380_C_T_b38
UKB_50_Standing_height	region1488	BreastMammaryTissue	ENSG00000170175	0.648834	0.5436	chr17_7468613_C_T_b38
UKB_50_Standing_height	region1504	BreastMammaryTissue	ENSG00000276293	0.91563	0.938	chr17_38765943_A_G_b38
UKB_50_Standing_height	region1504	BreastMammaryTissue	ENSG00000277791	0.930735	0.9373	chr17_38765943_A_G_b38
UKB_50_Standing_height	region1547	BreastMammaryTissue	ENSG00000141429	0.698583	0.8875	chr18_35517225_G_A_b38
UKB_50_Standing_height	region1547	BreastMammaryTissue	ENSG00000153391	0.711836	0.9073	chr18_35517225_G_A_b38
UKB_50_Standing_height	region1581	BreastMammaryTissue	ENSG00000127663	0.706933	0.448	chr19_4954443_G_A_b38
UKB_50_Standing_height	region1606	BreastMammaryTissue	ENSG00000176472	0.434259	0.7514	chr19_43533218_C_G_b38
UKB_50_Standing_height	region1610	BreastMammaryTissue	ENSG00000126464	0.340901	0.618	chr19_49593164_C_G_b38
UKB_50_Standing_height	region1651	BreastMammaryTissue	ENSG00000273619	0.357922	0.6329	chr20_62386309_T_C_b38
UKB_50_Standing_height	region186	BreastMammaryTissue	ENSG00000234028	0.457516	0.6627	chr2_88626830_G_C_b38
UKB_50_Standing_height	region194	BreastMammaryTissue	ENSG00000119147	0.844843	0.8557	chr2_106073280_G_A_b38
UKB_50_Standing_height	region21	BreastMammaryTissue	ENSG00000116883	0.585607	0.8515	chr1_36323945_A_G_b38
UKB_50_Standing_height	region22	BreastMammaryTissue	ENSG00000183386	0.895787	0.9578	chr1_37996149_C_T_b38
UKB_50_Standing_height	region22	BreastMammaryTissue	ENSG00000183520	0.566495	0.7764	chr1_37990219_G_C_b38
UKB_50_Standing_height	region275	BreastMammaryTissue	ENSG00000176720	0.326872	0.4651	chr2_241561247_C_T_b38
UKB_50_Standing_height	region283	BreastMammaryTissue	ENSG00000163703	1	0.9999	chr3_9933702_C_G_b38
UKB_50_Standing_height	region283	BreastMammaryTissue	ENSG00000269894	0.729409	0.9854	chr3_9933702_C_G_b38
UKB_50_Standing_height	region715	BreastMammaryTissue	ENSG00000198945	0.999996	0.9991	chr6_130053316_T_A_b38
UKB_50_Standing_height	region934	BreastMammaryTissue	ENSG00000178209	0.637247	0.8336	chr8_143938609_C_G_b38
UKB_50_Standing_height	region1004	ColonTransverse	ENSG00000169925	0.480097	0.7122	chr9_134066656_C_A_b38
UKB_50_Standing_height	region1007	ColonTransverse	ENSG00000165661	0.397165	0.3179	chr9_136243135_A_G_b38
UKB_50_Standing_height	region1008	ColonTransverse	ENSG00000233016	0.554195	0.8043	chr9_136723384_C_T_b38
UKB_50_Standing_height	region104	ColonTransverse	ENSG00000117280	0.378265	0.4374	chr1_205770138_C_T_b38
UKB_50_Standing_height	region1058	ColonTransverse	ENSG00000151208	0.359114	0.5272	chr10_77819493_G_A_b38
UKB_50_Standing_height	region1085	ColonTransverse	ENSG00000107679	0.666928	0.8425	chr10_122379180_TCCTGTCAGTTTAC_T_b38
UKB_50_Standing_height	region1094	ColonTransverse	ENSG00000177951	0.649665	0.8516	chr11_207359_C_CGGCCACAGCCGCCTCAGACGT_b38
UKB_50_Standing_height	region1189	ColonTransverse	ENSG00000183150	0.387134	0.3984	chr12_12696307_A_G_b38
UKB_50_Standing_height	region1321	ColonTransverse	ENSG00000130177	0.303312	0.5898	chr13_114234842_T_C_b38
UKB_50_Standing_height	region1419	ColonTransverse	ENSG00000140575	0.326716	0.6335	chr15_90466252_G_A_b38
UKB_50_Standing_height	region1483	ColonTransverse	ENSG00000132386	0.458822	0.4738	chr17_1762130_G_A_b38
UKB_50_Standing_height	region1509	ColonTransverse	ENSG00000248278	0.446402	0.3374	chr17_48889588_T_C_b38
UKB_50_Standing_height	region1609	ColonTransverse	ENSG00000105538	0.43019	0.6512	chr19_48711838_C_T_b38
UKB_50_Standing_height	region1643	ColonTransverse	ENSG00000166913	0.325283	0.4324	chr20_44874635_C_A_b38
UKB_50_Standing_height	region1651	ColonTransverse	ENSG00000273619	0.31877	0.6596	chr20_62386309_T_C_b38
UKB_50_Standing_height	region194	ColonTransverse	ENSG00000119147	0.78705	0.7698	chr2_106073280_G_A_b38
UKB_50_Standing_height	region21	ColonTransverse	ENSG00000116883	0.617366	0.8514	chr1_36323945_A_G_b38
UKB_50_Standing_height	region21	ColonTransverse	ENSG00000142694	0.620201	0.8419	chr1_36323945_A_G_b38
UKB_50_Standing_height	region22	ColonTransverse	ENSG00000183386	0.435496	0.4624	chr1_37996149_C_T_b38
UKB_50_Standing_height	region236	ColonTransverse	ENSG00000271151	0.319737	0.7415	chr2_173968239_G_T_b38
UKB_50_Standing_height	region283	ColonTransverse	ENSG00000163703	1	0.9996	chr3_9933702_C_G_b38
UKB_50_Standing_height	region715	ColonTransverse	ENSG00000198945	0.999996	0.9998	chr6_130053316_T_A_b38
UKB_50_Standing_height	region1008	KidneyCortex	ENSG00000233016	0.586797	0.8578	chr9_136727975_G_GGCCCCCATCCCGCGGCTCGC_b38
UKB_50_Standing_height	region1488	KidneyCortex	ENSG00000170175	0.640875	0.645	chr17_7469318_C_T_b38
UKB_50_Standing_height	region345	KidneyCortex	ENSG00000243795	0.432992	0.6411	chr3_113106726_A_G_b38
UKB_50_Standing_height	region715	KidneyCortex	ENSG00000198945	0.999466	0.9496	chr6_130053316_T_A_b38
UKB_50_Standing_height	region1008	Lung	ENSG00000233016	0.709894	0.8973	chr9_136727975_G_GGCCCCCATCCCGCGGCTCGC_b38
UKB_50_Standing_height	region1014	Lung	ENSG00000151632	0.402298	0.8012	chr10_5001312_G_A_b38
UKB_50_Standing_height	region104	Lung	ENSG00000069275	0.631756	0.8836	chr1_205750404_G_A_b38
UKB_50_Standing_height	region1058	Lung	ENSG00000151208	0.335973	0.5143	chr10_77819493_G_A_b38
UKB_50_Standing_height	region1102	Lung	ENSG00000050165	0.425684	0.6932	chr11_11964514_T_C_b38
UKB_50_Standing_height	region1106	Lung	ENSG00000179119	0.325611	0.5738	chr11_18634515_G_C_b38
UKB_50_Standing_height	region1185	Lung	ENSG00000166532	0.762124	0.8829	chr12_8679358_T_A_b38
UKB_50_Standing_height	region1189	Lung	ENSG00000183150	0.392629	0.4266	chr12_12696307_A_G_b38
UKB_50_Standing_height	region1322	Lung	ENSG00000165801	0.703383	0.9123	chr14_21071525_C_T_b38
UKB_50_Standing_height	region1324	Lung	ENSG00000100968	0.62006	0.9151	chr14_24365909_G_A_b38
UKB_50_Standing_height	region1419	Lung	ENSG00000140575	0.325509	0.6423	chr15_90466252_G_A_b38
UKB_50_Standing_height	region1483	Lung	ENSG00000132386	0.720898	0.7681	chr17_1764380_C_T_b38
UKB_50_Standing_height	region1504	Lung	ENSG00000277791	0.95499	0.9834	chr17_38765943_A_G_b38
UKB_50_Standing_height	region1520	Lung	ENSG00000108932	0.505997	0.6032	chr17_68290054_T_A_b38
UKB_50_Standing_height	region1606	Lung	ENSG00000176472	0.381498	0.715	chr19_43541349_C_T_b38
UKB_50_Standing_height	region1634	Lung	ENSG00000101367	0.31585	0.6761	chr20_32828097_G_C_b38
UKB_50_Standing_height	region1651	Lung	ENSG00000273619	0.395517	0.6934	chr20_62386309_T_C_b38
UKB_50_Standing_height	region1692	Lung	ENSG00000183741	0.628423	0.403	chr22_38886013_C_T_b38
UKB_50_Standing_height	region1693	Lung	ENSG00000239713	0.334004	0.5971	chr22_39076172_C_A_b38
UKB_50_Standing_height	region1693	Lung	ENSG00000279833	0.350703	0.4693	chr22_39165474_G_C_b38
UKB_50_Standing_height	region186	Lung	ENSG00000234028	0.479564	0.6595	chr2_88641972_G_A_b38
UKB_50_Standing_height	region194	Lung	ENSG00000119147	0.895424	0.9639	chr2_106073280_G_A_b38
UKB_50_Standing_height	region21	Lung	ENSG00000116883	0.566451	0.8492	chr1_36323945_A_G_b38
UKB_50_Standing_height	region21	Lung	ENSG00000142694	0.571653	0.8437	chr1_36323945_A_G_b38
UKB_50_Standing_height	region21	Lung	ENSG00000214193	0.557973	0.8355	chr1_36292460_C_T_b38
UKB_50_Standing_height	region22	Lung	ENSG00000183386	0.932628	0.9804	chr1_37996149_C_T_b38
UKB_50_Standing_height	region22	Lung	ENSG00000183520	0.776364	0.6521	chr1_37996149_C_T_b38
UKB_50_Standing_height	region283	Lung	ENSG00000163702	0.980024	0.9999	chr3_9933702_C_G_b38
UKB_50_Standing_height	region283	Lung	ENSG00000163703	1	1	chr3_9933702_C_G_b38
UKB_50_Standing_height	region345	Lung	ENSG00000243795	0.51154	0.7954	chr3_113108538_T_C_b38
UKB_50_Standing_height	region541	Lung	ENSG00000113389	0.544887	0.6727	chr5_32829869_C_G_b38
UKB_50_Standing_height	region715	Lung	ENSG00000198945	0.999996	0.9999	chr6_130053316_T_A_b38
UKB_50_Standing_height	region89	Lung	ENSG00000135835	0.894267	0.9745	chr1_180936558_C_T_b38
UKB_50_Standing_height	region1008	MuscleSkeletal	ENSG00000233016	0.746435	0.8789	chr9_136727975_G_GGCCCCCATCCCGCGGCTCGC_b38
UKB_50_Standing_height	region1122	MuscleSkeletal	ENSG00000109919	0.457217	0.3237	chr11_47628586_AT_A_b38
UKB_50_Standing_height	region1127	MuscleSkeletal	ENSG00000134824	0.644391	0.8232	chr11_61814184_G_A_b38
UKB_50_Standing_height	region1127	MuscleSkeletal	ENSG00000149485	0.430786	0.6208	chr11_61813896_A_G_b38
UKB_50_Standing_height	region11	MuscleSkeletal	ENSG00000117122	0.351757	0.3241	chr1_16980180_C_G_b38
UKB_50_Standing_height	region1321	MuscleSkeletal	ENSG00000130177	0.309783	0.5642	chr13_114235244_G_A_b38
UKB_50_Standing_height	region1348	MuscleSkeletal	ENSG00000184302	0.307156	0.6112	chr14_60509819_C_A_b38
UKB_50_Standing_height	region1428	MuscleSkeletal	ENSG00000103245	0.682658	0.4198	chr16_733864_C_A_b38
UKB_50_Standing_height	region1473	MuscleSkeletal	ENSG00000135698	0.358495	0.4866	chr16_82170153_C_T_b38
UKB_50_Standing_height	region1483	MuscleSkeletal	ENSG00000132386	0.691791	0.5985	chr17_1767515_G_A_b38
UKB_50_Standing_height	region1504	MuscleSkeletal	ENSG00000277182	0.691028	0.6626	chr17_38757554_T_C_b38
UKB_50_Standing_height	region1606	MuscleSkeletal	ENSG00000176472	0.434983	0.7031	chr19_43546814_T_C_b38
UKB_50_Standing_height	region1629	MuscleSkeletal	ENSG00000089101	0.711902	0.8724	chr20_20086057_C_T_b38
UKB_50_Standing_height	region1634	MuscleSkeletal	ENSG00000260257	0.368712	0.5922	chr20_32852422_G_A_b38
UKB_50_Standing_height	region1651	MuscleSkeletal	ENSG00000273619	0.54914	0.6793	chr20_62386309_T_C_b38
UKB_50_Standing_height	region1651	MuscleSkeletal	ENSG00000275437	0.410666	0.585	chr20_62403468_C_G_b38
UKB_50_Standing_height	region1687	MuscleSkeletal	ENSG00000128342	0.344117	0.7015	chr22_30196498_C_G_b38
UKB_50_Standing_height	region194	MuscleSkeletal	ENSG00000119147	0.908008	0.9574	chr2_106073280_G_A_b38
UKB_50_Standing_height	region21	MuscleSkeletal	ENSG00000116883	0.403726	0.763	chr1_36323945_A_G_b38
UKB_50_Standing_height	region233	MuscleSkeletal	ENSG00000152253	0.374509	0.3881	chr2_168848594_A_T_b38
UKB_50_Standing_height	region283	MuscleSkeletal	ENSG00000163704	0.953709	0.9869	chr3_9933702_C_G_b38
UKB_50_Standing_height	region283	MuscleSkeletal	ENSG00000230082	0.901449	0.9005	chr3_9933702_C_G_b38
UKB_50_Standing_height	region345	MuscleSkeletal	ENSG00000240057	0.538523	0.7464	chr3_113110314_G_C_b38
UKB_50_Standing_height	region345	MuscleSkeletal	ENSG00000243795	0.495741	0.4872	chr3_113110314_G_C_b38
UKB_50_Standing_height	region715	MuscleSkeletal	ENSG00000198945	0.957993	0.5936	chr6_130053316_T_A_b38
UKB_50_Standing_height	region784	MuscleSkeletal	ENSG00000196715	0.625102	0.7754	chr7_65901744_T_A_b38
UKB_50_Standing_height	region1008	Ovary	ENSG00000233016	0.727241	0.8983	chr9_136727975_G_GGCCCCCATCCCGCGGCTCGC_b38
UKB_50_Standing_height	region1094	Ovary	ENSG00000177951	0.425881	0.85	chr11_207359_C_CGGCCACAGCCGCCTCAGACGT_b38
UKB_50_Standing_height	region1178	Ovary	ENSG00000139044	0.681332	0.8517	chr12_481093_G_A_b38
UKB_50_Standing_height	region1483	Ovary	ENSG00000185924	0.572723	0.4493	chr17_1764380_C_T_b38
UKB_50_Standing_height	region1504	Ovary	ENSG00000277791	0.46581	0.6503	chr17_38765943_A_G_b38
UKB_50_Standing_height	region1606	Ovary	ENSG00000176472	0.433979	0.7192	chr19_43533218_C_G_b38
UKB_50_Standing_height	region1609	Ovary	ENSG00000105538	0.452377	0.7081	chr19_48717066_A_G_b38
UKB_50_Standing_height	region1610	Ovary	ENSG00000126464	0.301307	0.486	chr19_49593164_C_G_b38
UKB_50_Standing_height	region1651	Ovary	ENSG00000273619	0.46924	0.7028	chr20_62386309_T_C_b38
UKB_50_Standing_height	region194	Ovary	ENSG00000119147	0.581972	0.9504	chr2_106073280_G_A_b38
UKB_50_Standing_height	region21	Ovary	ENSG00000116883	0.592003	0.8532	chr1_36323945_A_G_b38
UKB_50_Standing_height	region22	Ovary	ENSG00000183386	0.654864	0.845	chr1_37990219_G_C_b38
UKB_50_Standing_height	region283	Ovary	ENSG00000163702	0.557605	0.9829	chr3_9933702_C_G_b38
UKB_50_Standing_height	region283	Ovary	ENSG00000163703	1	0.9996	chr3_9933702_C_G_b38
UKB_50_Standing_height	region283	Ovary	ENSG00000269894	0.999988	1	chr3_9933702_C_G_b38
UKB_50_Standing_height	region345	Ovary	ENSG00000243795	0.418431	0.5819	chr3_113110595_G_A_b38
UKB_50_Standing_height	region1008	Prostate	ENSG00000233016	0.677471	0.8845	chr9_136727975_G_GGCCCCCATCCCGCGGCTCGC_b38
UKB_50_Standing_height	region1014	Prostate	ENSG00000151632	0.342349	0.7475	chr10_5001312_G_A_b38
UKB_50_Standing_height	region104	Prostate	ENSG00000117280	0.622501	0.6447	chr1_205770138_C_T_b38
UKB_50_Standing_height	region1106	Prostate	ENSG00000179119	0.345845	0.589	chr11_18634515_G_C_b38
UKB_50_Standing_height	region1322	Prostate	ENSG00000165801	0.3269	0.4074	chr14_21069908_C_A_b38
UKB_50_Standing_height	region1504	Prostate	ENSG00000277791	0.536069	0.6129	chr17_38757554_T_C_b38
UKB_50_Standing_height	region1517	Prostate	ENSG00000267280	0.540997	0.5322	chr17_61414023_A_G_b38
UKB_50_Standing_height	region1606	Prostate	ENSG00000176472	0.438477	0.7473	chr19_43533218_C_G_b38
UKB_50_Standing_height	region1635	Prostate	ENSG00000101417	0.417119	0.7982	chr20_33717975_A_T_b38
UKB_50_Standing_height	region1693	Prostate	ENSG00000239713	0.390768	0.6899	chr22_39085388_C_G_b38
UKB_50_Standing_height	region194	Prostate	ENSG00000119147	0.482309	0.569	chr2_106071000_G_C_b38
UKB_50_Standing_height	region21	Prostate	ENSG00000116883	0.612446	0.8591	chr1_36323945_A_G_b38
UKB_50_Standing_height	region21	Prostate	ENSG00000142694	0.605414	0.8616	chr1_36323945_A_G_b38
UKB_50_Standing_height	region22	Prostate	ENSG00000183386	0.65251	0.7324	chr1_37996149_C_T_b38
UKB_50_Standing_height	region283	Prostate	ENSG00000163703	1	1	chr3_9933702_C_G_b38
UKB_50_Standing_height	region283	Prostate	ENSG00000269894	0.8165	0.9952	chr3_9933702_C_G_b38
UKB_50_Standing_height	region345	Prostate	ENSG00000243795	0.511138	0.5515	chr3_113107834_C_T_b38
UKB_50_Standing_height	region715	Prostate	ENSG00000198945	0.999997	0.9982	chr6_130053316_T_A_b38
UKB_50_Standing_height	region1008	Testis	ENSG00000233016	0.693614	0.8704	chr9_136727975_G_GGCCCCCATCCCGCGGCTCGC_b38
UKB_50_Standing_height	region1014	Testis	ENSG00000151632	0.343508	0.6935	chr10_5001312_G_A_b38
UKB_50_Standing_height	region104	Testis	ENSG00000069275	0.306828	0.7188	chr1_205750404_G_A_b38
UKB_50_Standing_height	region1054	Testis	ENSG00000122912	0.350342	0.8982	chr10_68527546_C_T_b38
UKB_50_Standing_height	region1079	Testis	ENSG00000043591	0.675453	0.8835	chr10_114039136_A_G_b38
UKB_50_Standing_height	region1127	Testis	ENSG00000149485	0.614393	0.8067	chr11_61814184_G_A_b38
UKB_50_Standing_height	region1135	Testis	ENSG00000149257	0.359394	0.7463	chr11_75565133_A_C_b38
UKB_50_Standing_height	region1431	Testis	ENSG00000168101	0.434924	0.6535	chr16_4696391_T_C_b38
UKB_50_Standing_height	region1446	Testis	ENSG00000260306	0.930798	0.3326	chr16_22297407_C_A_b38
UKB_50_Standing_height	region1498	Testis	ENSG00000227543	0.630253	0.5451	chr17_28599142_C_A_b38
UKB_50_Standing_height	region1504	Testis	ENSG00000277791	0.961489	0.9834	chr17_38765943_A_G_b38
UKB_50_Standing_height	region1524	Testis	ENSG00000108639	0.771172	0.928	chr17_78168967_G_C_b38
UKB_50_Standing_height	region1606	Testis	ENSG00000073050	0.376167	0.5891	chr19_43558535_G_A_b38
UKB_50_Standing_height	region1634	Testis	ENSG00000260257	0.304942	0.5477	chr20_32852422_G_A_b38
UKB_50_Standing_height	region1635	Testis	ENSG00000101417	0.333741	0.7702	chr20_33717975_A_T_b38
UKB_50_Standing_height	region1651	Testis	ENSG00000273619	0.356879	0.6355	chr20_62386309_T_C_b38
UKB_50_Standing_height	region1651	Testis	ENSG00000275437	0.439701	0.7735	chr20_62403468_C_G_b38
UKB_50_Standing_height	region1692	Testis	ENSG00000183741	0.615398	0.7446	chr22_38885769_T_G_b38
UKB_50_Standing_height	region173	Testis	ENSG00000237979	0.44836	0.7277	chr2_65520308_A_G_b38
UKB_50_Standing_height	region194	Testis	ENSG00000119147	0.822932	0.8029	chr2_106073280_G_A_b38
UKB_50_Standing_height	region21	Testis	ENSG00000116883	0.482732	0.8089	chr1_36323945_A_G_b38
UKB_50_Standing_height	region283	Testis	ENSG00000163703	1	1	chr3_9933702_C_G_b38
UKB_50_Standing_height	region541	Testis	ENSG00000113389	0.778017	0.9282	chr5_32831833_T_C_b38
UKB_50_Standing_height	region598	Testis	ENSG00000072682	0.646064	0.8478	chr5_132287665_A_G_b38
UKB_50_Standing_height	region599	Testis	ENSG00000069011	0.463371	0.6235	chr5_135036995_T_C_b38
UKB_50_Standing_height	region715	Testis	ENSG00000198945	0.999995	0.9985	chr6_130053316_T_A_b38
UKB_50_Standing_height	region76	Testis	ENSG00000163357	0.426671	0.9436	chr1_155033975_C_G_b38
UKB_50_Standing_height	region938	Testis	ENSG00000107249	0.763503	0.5274	chr9_4297892_T_C_b38
UKB_50_Standing_height	region1008	WholeBlood	ENSG00000233016	0.718824	0.8698	chr9_136727975_G_GGCCCCCATCCCGCGGCTCGC_b38
UKB_50_Standing_height	region1014	WholeBlood	ENSG00000151632	0.393737	0.6889	chr10_5000102_T_C_b38
UKB_50_Standing_height	region1014	WholeBlood	ENSG00000187134	0.477987	0.5701	chr10_5001312_G_A_b38
UKB_50_Standing_height	region1085	WholeBlood	ENSG00000107679	0.642851	0.4471	chr10_122379180_TCCTGTCAGTTTAC_T_b38
UKB_50_Standing_height	region1189	WholeBlood	ENSG00000183150	0.597381	0.5275	chr12_12697434_T_C_b38
UKB_50_Standing_height	region11	WholeBlood	ENSG00000186715	0.788129	0.5892	chr1_16980180_C_G_b38
UKB_50_Standing_height	region1267	WholeBlood	ENSG00000139514	0.543406	0.8001	chr13_29598614_G_T_b38
UKB_50_Standing_height	region1322	WholeBlood	ENSG00000165801	0.539589	0.7147	chr14_21069908_C_A_b38
UKB_50_Standing_height	region1406	WholeBlood	ENSG00000140455	0.388456	0.6349	chr15_63500559_G_GT_b38
UKB_50_Standing_height	region1419	WholeBlood	ENSG00000140575	0.33022	0.5797	chr15_90466252_G_A_b38
UKB_50_Standing_height	region1428	WholeBlood	ENSG00000103245	0.888672	0.8991	chr16_733864_C_A_b38
UKB_50_Standing_height	region1428	WholeBlood	ENSG00000103253	0.322745	0.4138	chr16_742190_A_G_b38
UKB_50_Standing_height	region1483	WholeBlood	ENSG00000167716	0.674213	0.7259	chr17_1764380_C_T_b38
UKB_50_Standing_height	region1504	WholeBlood	ENSG00000277791	0.965818	0.9836	chr17_38765943_A_G_b38
UKB_50_Standing_height	region1520	WholeBlood	ENSG00000108932	0.43164	0.387	chr17_68297719_G_A_b38
UKB_50_Standing_height	region1651	WholeBlood	ENSG00000273619	0.478223	0.6327	chr20_62386309_T_C_b38
UKB_50_Standing_height	region176	WholeBlood	ENSG00000221823	0.359181	0.4897	chr2_68213647_C_T_b38
UKB_50_Standing_height	region21	WholeBlood	ENSG00000116883	0.603754	0.8215	chr1_36323945_A_G_b38
UKB_50_Standing_height	region22	WholeBlood	ENSG00000183520	0.574435	0.5923	chr1_37996149_C_T_b38
UKB_50_Standing_height	region283	WholeBlood	ENSG00000163703	0.999999	0.9999	chr3_9933702_C_G_b38
UKB_50_Standing_height	region715	WholeBlood	ENSG00000198945	0.999996	0.9991	chr6_130053316_T_A_b38
UKB_50_Standing_height	region853	WholeBlood	ENSG00000253641	0.662214	0.4424	chr8_10429105_G_A_b38
UKB_6150_1_Vascular_or_heart_problems_diagnosed_by_doctor_Heart_attack	region114	BreastMammaryTissue	ENSG00000272750	0.534356	0.7812	chr1_222668272_G_A_b38
UKB_6150_1_Vascular_or_heart_problems_diagnosed_by_doctor_Heart_attack	region66	BreastMammaryTissue	ENSG00000134222	0.705784	0.8799	chr1_109274968_G_T_b38
UKB_6150_1_Vascular_or_heart_problems_diagnosed_by_doctor_Heart_attack	region114	ColonTransverse	ENSG00000272750	0.434254	0.7705	chr1_222661461_T_C_b38
UKB_6150_1_Vascular_or_heart_problems_diagnosed_by_doctor_Heart_attack	region66	ColonTransverse	ENSG00000134222	0.652223	0.9189	chr1_109278889_T_G_b38
UKB_6150_1_Vascular_or_heart_problems_diagnosed_by_doctor_Heart_attack	region114	Lung	ENSG00000272750	0.315907	0.7441	chr1_222661461_T_C_b38
UKB_6150_1_Vascular_or_heart_problems_diagnosed_by_doctor_Heart_attack	region114	MuscleSkeletal	ENSG00000272750	0.579628	0.8912	chr1_222661161_A_T_b38
UKB_6150_1_Vascular_or_heart_problems_diagnosed_by_doctor_Heart_attack	region66	MuscleSkeletal	ENSG00000134222	0.744508	0.9564	chr1_109279544_G_A_b38
UKB_6150_1_Vascular_or_heart_problems_diagnosed_by_doctor_Heart_attack	region66	MuscleSkeletal	ENSG00000143126	0.645886	0.8873	chr1_109274570_A_G_b38
UKB_6150_1_Vascular_or_heart_problems_diagnosed_by_doctor_Heart_attack	region114	Prostate	ENSG00000272750	0.403876	0.5834	chr1_222661161_A_T_b38
UKB_6150_1_Vascular_or_heart_problems_diagnosed_by_doctor_Heart_attack	region66	Prostate	ENSG00000134222	0.443344	0.685	chr1_109274968_G_T_b38
UKB_6150_1_Vascular_or_heart_problems_diagnosed_by_doctor_Heart_attack	region114	Testis	ENSG00000272750	0.453237	0.541	chr1_222661161_A_T_b38
UKB_6150_1_Vascular_or_heart_problems_diagnosed_by_doctor_Heart_attack	region66	Testis	ENSG00000134222	0.696197	0.7147	chr1_109275216_T_C_b38
UKB_6150_1_Vascular_or_heart_problems_diagnosed_by_doctor_Heart_attack	region114	WholeBlood	ENSG00000272750	0.329213	0.7528	chr1_222661161_A_T_b38
UKB_6150_1_Vascular_or_heart_problems_diagnosed_by_doctor_Heart_attack	region66	WholeBlood	ENSG00000134222	0.528575	0.8554	chr1_109275908_C_T_b38
UKB_6152_5_diagnosed_by_doctor_Blood_clot_in_the_leg_DVT	region1004	ColonTransverse	ENSG00000175164	0.343244	0.6312	chr9_133273813_C_T_b38
UKB_6152_5_diagnosed_by_doctor_Blood_clot_in_the_leg_DVT	region517	Lung	ENSG00000088926	0.341972	0.697	chr4_186271327_T_C_b38
UKB_6152_5_diagnosed_by_doctor_Blood_clot_in_the_leg_DVT	region517	Lung	ENSG00000251165	0.324891	0.7436	chr4_186270633_G_A_b38
UKB_6152_5_diagnosed_by_doctor_Blood_clot_in_the_leg_DVT	region1004	Testis	ENSG00000175164	0.663311	0.3782	chr9_133261703_A_G_b38
UKB_6152_5_diagnosed_by_doctor_Blood_clot_in_the_leg_DVT	region1004	WholeBlood	ENSG00000175164	0.645317	0.5612	chr9_133269015_C_T_b38
UKB_6152_8_diagnosed_by_doctor_Asthma	region1504	ColonTransverse	ENSG00000073605	0.75536	0.8514	chr17_39900944_G_A_b38
UKB_6152_8_diagnosed_by_doctor_Asthma	region1608	ColonTransverse	ENSG00000185800	0.531062	0.5986	chr19_45805458_A_G_b38
UKB_6152_8_diagnosed_by_doctor_Asthma	region476	ColonTransverse	ENSG00000138688	0.352641	0.3936	chr4_122192197_A_G_b38
UKB_6152_8_diagnosed_by_doctor_Asthma	region598	ColonTransverse	ENSG00000113522	0.348786	0.5237	chr5_132554779_C_T_b38
UKB_6152_8_diagnosed_by_doctor_Asthma	region1127	MuscleSkeletal	ENSG00000168496	0.332884	0.4422	chr11_61790354_T_C_b38
UKB_6152_8_diagnosed_by_doctor_Asthma	region1508	MuscleSkeletal	ENSG00000006062	0.712219	0.8777	chr17_45281874_A_G_b38
UKB_6152_8_diagnosed_by_doctor_Asthma	region476	MuscleSkeletal	ENSG00000138688	0.440989	0.4691	chr4_122192197_A_G_b38
UKB_6152_8_diagnosed_by_doctor_Asthma	region1127	Ovary	ENSG00000134825	0.327258	0.4192	chr11_61801834_C_G_b38
UKB_6152_8_diagnosed_by_doctor_Asthma	region1067	Prostate	ENSG00000236493	0.47892	0.8609	chr10_92669710_C_T_b38
UKB_6152_8_diagnosed_by_doctor_Asthma	region1127	Prostate	ENSG00000149485	0.378527	0.5311	chr11_61828850_CA_C_b38
UKB_6152_8_diagnosed_by_doctor_Asthma	region1608	Prostate	ENSG00000104936	0.364623	0.4106	chr19_45782104_G_GC_b38
UKB_6152_8_diagnosed_by_doctor_Asthma	region1067	Testis	ENSG00000152804	0.406549	0.3689	chr10_92669710_C_T_b38
UKB_6152_8_diagnosed_by_doctor_Asthma	region584	Testis	ENSG00000248428	0.999779	0.9983	chr5_111066174_T_C_b38
UKB_6152_8_diagnosed_by_doctor_Asthma	region102	WholeBlood	ENSG00000133048	0.499153	0.7721	chr1_203131901_G_A_b38
UKB_6152_8_diagnosed_by_doctor_Asthma	region102	WholeBlood	ENSG00000133055	0.485998	0.8096	chr1_203131901_G_A_b38
UKB_6152_8_diagnosed_by_doctor_Asthma	region102	WholeBlood	ENSG00000133063	0.406442	0.7897	chr1_203119254_G_T_b38
UKB_6152_8_diagnosed_by_doctor_Asthma	region102	WholeBlood	ENSG00000143847	0.397184	0.3859	chr1_203089348_C_T_b38
UKB_6152_8_diagnosed_by_doctor_Asthma	region102	WholeBlood	ENSG00000163485	0.532895	0.813	chr1_203119486_G_A_b38
UKB_6152_8_diagnosed_by_doctor_Asthma	region1127	WholeBlood	ENSG00000134824	0.395839	0.7435	chr11_61825533_A_G_b38
UKB_6152_8_diagnosed_by_doctor_Asthma	region1129	WholeBlood	ENSG00000172638	0.330122	0.6043	chr11_65895248_C_T_b38
UKB_6152_8_diagnosed_by_doctor_Asthma	region1408	WholeBlood	ENSG00000103591	0.719619	0.3887	chr15_67163292_C_T_b38
UKB_6152_8_diagnosed_by_doctor_Asthma	region984	WholeBlood	ENSG00000106799	0.960185	0.5986	chr9_99170243_A_G_b38
UKB_6152_8_diagnosed_by_doctor_Asthma	region99	WholeBlood	ENSG00000236278	0.314121	0.6538	chr1_198684045_A_G_b38
UKB_6152_9_diagnosed_by_doctor_Hayfever_allergic_rhinitis_or_eczema	region1074	BreastMammaryTissue	ENSG00000171206	0.868893	0.3035	chr10_102620929_G_A_b38
UKB_6152_9_diagnosed_by_doctor_Hayfever_allergic_rhinitis_or_eczema	region1419	BreastMammaryTissue	ENSG00000140575	0.606545	0.3433	chr15_90466252_G_A_b38
UKB_6152_9_diagnosed_by_doctor_Hayfever_allergic_rhinitis_or_eczema	region1506	BreastMammaryTissue	ENSG00000108784	0.401241	0.4799	chr17_42534022_C_T_b38
UKB_6152_9_diagnosed_by_doctor_Hayfever_allergic_rhinitis_or_eczema	region361	BreastMammaryTissue	ENSG00000177311	0.479712	0.6244	chr3_141406344_A_G_b38
UKB_6152_9_diagnosed_by_doctor_Hayfever_allergic_rhinitis_or_eczema	region5	BreastMammaryTissue	ENSG00000232912	0.36495	0.429	chr1_8424763_A_G_b38
UKB_6152_9_diagnosed_by_doctor_Hayfever_allergic_rhinitis_or_eczema	region79	BreastMammaryTissue	ENSG00000158869	0.91788	0.9653	chr1_161215268_G_T_b38
UKB_6152_9_diagnosed_by_doctor_Hayfever_allergic_rhinitis_or_eczema	region1251	ColonTransverse	ENSG00000157837	0.727156	0.3693	chr12_120807949_A_AT_b38
UKB_6152_9_diagnosed_by_doctor_Hayfever_allergic_rhinitis_or_eczema	region1419	ColonTransverse	ENSG00000140575	0.601486	0.3044	chr15_90466252_G_A_b38
UKB_6152_9_diagnosed_by_doctor_Hayfever_allergic_rhinitis_or_eczema	region148	ColonTransverse	ENSG00000270210	0.415983	0.3816	chr2_28407025_T_C_b38
UKB_6152_9_diagnosed_by_doctor_Hayfever_allergic_rhinitis_or_eczema	region1506	ColonTransverse	ENSG00000108784	0.394537	0.4514	chr17_42537595_G_C_b38
UKB_6152_9_diagnosed_by_doctor_Hayfever_allergic_rhinitis_or_eczema	region718	ColonTransverse	ENSG00000135541	0.381907	0.4666	chr6_135497759_C_A_b38
UKB_6152_9_diagnosed_by_doctor_Hayfever_allergic_rhinitis_or_eczema	region79	ColonTransverse	ENSG00000158869	0.845067	0.9225	chr1_161215268_G_T_b38
UKB_6152_9_diagnosed_by_doctor_Hayfever_allergic_rhinitis_or_eczema	region1074	Lung	ENSG00000171206	0.816712	0.6766	chr10_102640355_T_C_b38
UKB_6152_9_diagnosed_by_doctor_Hayfever_allergic_rhinitis_or_eczema	region1159	Lung	ENSG00000204381	0.608624	0.6742	chr11_111562884_A_T_b38
UKB_6152_9_diagnosed_by_doctor_Hayfever_allergic_rhinitis_or_eczema	region1419	Lung	ENSG00000140575	0.321877	0.3586	chr15_90466252_G_A_b38
UKB_6152_9_diagnosed_by_doctor_Hayfever_allergic_rhinitis_or_eczema	region1506	Lung	ENSG00000108784	0.395799	0.5141	chr17_42527700_C_T_b38
UKB_6152_9_diagnosed_by_doctor_Hayfever_allergic_rhinitis_or_eczema	region1681	Lung	ENSG00000161180	0.304653	0.5127	chr22_21627960_T_C_b38
UKB_6152_9_diagnosed_by_doctor_Hayfever_allergic_rhinitis_or_eczema	region591	Lung	ENSG00000145779	0.401354	0.3471	chr5_119355086_C_G_b38
UKB_6152_9_diagnosed_by_doctor_Hayfever_allergic_rhinitis_or_eczema	region5	Lung	ENSG00000142599	0.704926	0.7979	chr1_8444361_C_A_b38
UKB_6152_9_diagnosed_by_doctor_Hayfever_allergic_rhinitis_or_eczema	region5	Lung	ENSG00000232912	0.571995	0.6425	chr1_8424763_A_G_b38
UKB_6152_9_diagnosed_by_doctor_Hayfever_allergic_rhinitis_or_eczema	region79	Lung	ENSG00000158869	0.982454	0.9941	chr1_161215268_G_T_b38
UKB_6152_9_diagnosed_by_doctor_Hayfever_allergic_rhinitis_or_eczema	region834	Lung	ENSG00000164867	0.765251	0.9111	chr7_150993088_C_T_b38
UKB_6152_9_diagnosed_by_doctor_Hayfever_allergic_rhinitis_or_eczema	region998	Lung	ENSG00000119408	0.459433	0.4225	chr9_124259988_G_T_b38
UKB_6152_9_diagnosed_by_doctor_Hayfever_allergic_rhinitis_or_eczema	region1008	MuscleSkeletal	ENSG00000197070	0.930772	0.9982	chr9_137605991_G_A_b38
UKB_6152_9_diagnosed_by_doctor_Hayfever_allergic_rhinitis_or_eczema	region1074	MuscleSkeletal	ENSG00000171206	0.777577	0.6967	chr10_102640355_T_C_b38
UKB_6152_9_diagnosed_by_doctor_Hayfever_allergic_rhinitis_or_eczema	region1074	MuscleSkeletal	ENSG00000272933	0.855845	0.4215	chr10_102626552_T_A_b38
UKB_6152_9_diagnosed_by_doctor_Hayfever_allergic_rhinitis_or_eczema	region1506	MuscleSkeletal	ENSG00000108784	0.41957	0.5726	chr17_42445537_A_G_b38
UKB_6152_9_diagnosed_by_doctor_Hayfever_allergic_rhinitis_or_eczema	region5	MuscleSkeletal	ENSG00000232912	0.558409	0.6764	chr1_8424763_A_G_b38
UKB_6152_9_diagnosed_by_doctor_Hayfever_allergic_rhinitis_or_eczema	region790	MuscleSkeletal	ENSG00000186088	0.64184	0.6931	chr7_77409628_C_T_b38
UKB_6152_9_diagnosed_by_doctor_Hayfever_allergic_rhinitis_or_eczema	region79	MuscleSkeletal	ENSG00000158869	0.987311	0.9946	chr1_161215268_G_T_b38
UKB_6152_9_diagnosed_by_doctor_Hayfever_allergic_rhinitis_or_eczema	region5	Ovary	ENSG00000232912	0.300009	0.3551	chr1_8424763_A_G_b38
UKB_6152_9_diagnosed_by_doctor_Hayfever_allergic_rhinitis_or_eczema	region79	Testis	ENSG00000158869	0.456919	0.8747	chr1_161215268_G_T_b38
UKB_6152_9_diagnosed_by_doctor_Hayfever_allergic_rhinitis_or_eczema	region1127	WholeBlood	ENSG00000013725	0.798651	0.4206	chr11_61025858_C_T_b38
UKB_6152_9_diagnosed_by_doctor_Hayfever_allergic_rhinitis_or_eczema	region1375	WholeBlood	ENSG00000131323	0.683386	0.3273	chr14_102774480_T_A_b38
UKB_6152_9_diagnosed_by_doctor_Hayfever_allergic_rhinitis_or_eczema	region1408	WholeBlood	ENSG00000103591	0.698927	0.3841	chr15_67163292_C_T_b38
UKB_6152_9_diagnosed_by_doctor_Hayfever_allergic_rhinitis_or_eczema	region148	WholeBlood	ENSG00000075426	0.568148	0.3867	chr2_28407025_T_C_b38
UKB_6152_9_diagnosed_by_doctor_Hayfever_allergic_rhinitis_or_eczema	region1506	WholeBlood	ENSG00000108784	0.343687	0.566	chr17_42538100_G_C_b38
UKB_6152_9_diagnosed_by_doctor_Hayfever_allergic_rhinitis_or_eczema	region197	WholeBlood	ENSG00000172965	0.843831	0.763	chr2_111495725_A_C_b38
UKB_6152_9_diagnosed_by_doctor_Hayfever_allergic_rhinitis_or_eczema	region361	WholeBlood	ENSG00000177311	0.51007	0.7464	chr3_141386728_A_G_b38
UKB_6152_9_diagnosed_by_doctor_Hayfever_allergic_rhinitis_or_eczema	region5	WholeBlood	ENSG00000142599	0.437939	0.6781	chr1_8437247_T_A_b38
UKB_6152_9_diagnosed_by_doctor_Hayfever_allergic_rhinitis_or_eczema	region5	WholeBlood	ENSG00000232912	0.604488	0.7216	chr1_8424763_A_G_b38
UKB_6152_9_diagnosed_by_doctor_Hayfever_allergic_rhinitis_or_eczema	region79	WholeBlood	ENSG00000158869	0.989337	0.9944	chr1_161215268_G_T_b38
UKB_20002_1065_self_reported_hypertension	region1412	BreastMammaryTissue	ENSG00000140465	0.583974	0.6796	chr15_74770056_C_T_b38
UKB_20002_1065_self_reported_hypertension	region1419	BreastMammaryTissue	ENSG00000182511	0.533313	0.5542	chr15_90884642_G_C_b38
UKB_20002_1065_self_reported_hypertension	region1430	BreastMammaryTissue	ENSG00000122390	0.439616	0.4626	chr16_3490962_A_C_b38
UKB_20002_1065_self_reported_hypertension	region1451	BreastMammaryTissue	ENSG00000103510	0.471779	0.725	chr16_31119853_G_A_b38
UKB_20002_1065_self_reported_hypertension	region1488	BreastMammaryTissue	ENSG00000183011	0.315467	0.7793	chr17_7882587_A_G_b38
UKB_20002_1065_self_reported_hypertension	region1523	BreastMammaryTissue	ENSG00000188878	0.570377	0.3644	chr17_75942275_C_CA_b38
UKB_20002_1065_self_reported_hypertension	region1590	BreastMammaryTissue	ENSG00000099331	0.898	0.6388	chr19_17108295_G_A_b38
UKB_20002_1065_self_reported_hypertension	region599	BreastMammaryTissue	ENSG00000170606	0.945409	0.8966	chr5_133091159_GTT_G_b38
UKB_20002_1065_self_reported_hypertension	region655	BreastMammaryTissue	ENSG00000204427	0.633538	0.6754	chr6_31642412_TAAAG_T_b38
UKB_20002_1065_self_reported_hypertension	region717	BreastMammaryTissue	ENSG00000118526	0.439991	0.7058	chr6_133888699_T_C_b38
UKB_20002_1065_self_reported_hypertension	region789	BreastMammaryTissue	ENSG00000165178	0.58198	0.3707	chr7_75415153_T_C_b38
UKB_20002_1065_self_reported_hypertension	region789	BreastMammaryTissue	ENSG00000205583	0.582116	0.6474	chr7_75432493_G_C_b38
UKB_20002_1065_self_reported_hypertension	region789	BreastMammaryTissue	ENSG00000223705	0.655014	0.5821	chr7_75415153_T_C_b38
UKB_20002_1065_self_reported_hypertension	region789	BreastMammaryTissue	ENSG00000263001	0.507743	0.5668	chr7_74720592_C_T_b38
UKB_20002_1065_self_reported_hypertension	region789	BreastMammaryTissue	ENSG00000272391	0.611031	0.69	chr7_75470858_C_T_b38
UKB_20002_1065_self_reported_hypertension	region789	BreastMammaryTissue	ENSG00000278416	0.383224	0.5147	chr7_75470146_A_C_b38
UKB_20002_1065_self_reported_hypertension	region961	BreastMammaryTissue	ENSG00000196196	0.99921	0.9979	chr9_35906474_C_T_b38
UKB_20002_1065_self_reported_hypertension	region1074	ColonTransverse	ENSG00000213277	0.311272	0.5539	chr10_103171827_G_C_b38
UKB_20002_1065_self_reported_hypertension	region1430	ColonTransverse	ENSG00000122390	0.437535	0.7201	chr16_3487226_A_G_b38
UKB_20002_1065_self_reported_hypertension	region1451	ColonTransverse	ENSG00000103510	0.313996	0.5457	chr16_31120293_A_G_b38
UKB_20002_1065_self_reported_hypertension	region1518	ColonTransverse	ENSG00000159640	0.665083	0.8208	chr17_63476980_C_T_b38
UKB_20002_1065_self_reported_hypertension	region1523	ColonTransverse	ENSG00000188878	0.552842	0.7137	chr17_75938049_G_A_b38
UKB_20002_1065_self_reported_hypertension	region1609	ColonTransverse	ENSG00000105538	0.304998	0.3467	chr19_48715180_A_C_b38
UKB_20002_1065_self_reported_hypertension	region1609	ColonTransverse	ENSG00000176920	0.356592	0.5711	chr19_48703205_C_T_b38
UKB_20002_1065_self_reported_hypertension	region597	ColonTransverse	ENSG00000138829	0.373416	0.3878	chr5_128509908_CA_C_b38
UKB_20002_1065_self_reported_hypertension	region649	ColonTransverse	ENSG00000010704	0.765999	0.8658	chr6_26091942_G_T_b38
UKB_20002_1065_self_reported_hypertension	region745	ColonTransverse	ENSG00000106003	0.785673	0.8763	chr7_2495267_T_G_b38
UKB_20002_1065_self_reported_hypertension	region750	ColonTransverse	ENSG00000106392	0.421365	0.6151	chr7_7237584_C_G_b38
UKB_20002_1065_self_reported_hypertension	region789	ColonTransverse	ENSG00000127957	0.797285	0.7124	chr7_75470858_C_T_b38
UKB_20002_1065_self_reported_hypertension	region789	ColonTransverse	ENSG00000205583	0.833669	0.8072	chr7_75432493_G_C_b38
UKB_20002_1065_self_reported_hypertension	region789	ColonTransverse	ENSG00000223705	0.598921	0.6137	chr7_75415153_T_C_b38
UKB_20002_1065_self_reported_hypertension	region789	ColonTransverse	ENSG00000263001	0.532749	0.5715	chr7_74720592_C_T_b38
UKB_20002_1065_self_reported_hypertension	region789	ColonTransverse	ENSG00000278416	0.849318	0.8112	chr7_75429830_C_T_b38
UKB_20002_1065_self_reported_hypertension	region961	ColonTransverse	ENSG00000196196	0.999285	0.9995	chr9_35906474_C_T_b38
UKB_20002_1065_self_reported_hypertension	region1518	KidneyCortex	ENSG00000159640	0.729307	0.8339	chr17_63476980_C_T_b38
UKB_20002_1065_self_reported_hypertension	region451	KidneyCortex	ENSG00000138675	0.900946	0.8171	chr4_80263187_A_T_b38
UKB_20002_1065_self_reported_hypertension	region789	KidneyCortex	ENSG00000205583	0.56563	0.6315	chr7_75415153_T_C_b38
UKB_20002_1065_self_reported_hypertension	region789	KidneyCortex	ENSG00000263001	0.43859	0.4878	chr7_74659260_G_A_b38
UKB_20002_1065_self_reported_hypertension	region789	KidneyCortex	ENSG00000278416	0.616113	0.6385	chr7_75415153_T_C_b38
UKB_20002_1065_self_reported_hypertension	region899	KidneyCortex	ENSG00000254689	0.422835	0.6702	chr8_81885443_G_A_b38
UKB_20002_1065_self_reported_hypertension	region1074	Lung	ENSG00000213277	0.301058	0.4804	chr10_103182487_T_G_b38
UKB_20002_1065_self_reported_hypertension	region1412	Lung	ENSG00000140465	0.47732	0.5304	chr15_74757602_G_A_b38
UKB_20002_1065_self_reported_hypertension	region1419	Lung	ENSG00000182511	0.315486	0.4486	chr15_90885291_CT_C_b38
UKB_20002_1065_self_reported_hypertension	region1451	Lung	ENSG00000103510	0.417418	0.5764	chr16_31120293_A_G_b38
UKB_20002_1065_self_reported_hypertension	region358	Lung	ENSG00000163785	0.50296	0.6822	chr3_134241412_TATA_T_b38
UKB_20002_1065_self_reported_hypertension	region541	Lung	ENSG00000113389	0.658432	0.7223	chr5_32830415_T_C_b38
UKB_20002_1065_self_reported_hypertension	region599	Lung	ENSG00000170606	0.75147	0.6204	chr5_133061659_G_A_b38
UKB_20002_1065_self_reported_hypertension	region717	Lung	ENSG00000227954	0.596635	0.7514	chr6_133888699_T_C_b38
UKB_20002_1065_self_reported_hypertension	region717	Lung	ENSG00000234567	0.510232	0.7316	chr6_133888699_T_C_b38
UKB_20002_1065_self_reported_hypertension	region727	Lung	ENSG00000120278	0.4605	0.5047	chr6_150677375_A_G_b38
UKB_20002_1065_self_reported_hypertension	region727	Lung	ENSG00000232891	0.405108	0.3745	chr6_150663605_G_A_b38
UKB_20002_1065_self_reported_hypertension	region750	Lung	ENSG00000106392	0.398914	0.562	chr7_7237584_C_G_b38
UKB_20002_1065_self_reported_hypertension	region789	Lung	ENSG00000127957	0.645821	0.6358	chr7_75532956_A_G_b38
UKB_20002_1065_self_reported_hypertension	region789	Lung	ENSG00000178809	0.472801	0.4544	chr7_75470858_C_T_b38
UKB_20002_1065_self_reported_hypertension	region789	Lung	ENSG00000205583	0.807559	0.778	chr7_75432493_G_C_b38
UKB_20002_1065_self_reported_hypertension	region789	Lung	ENSG00000223705	0.787902	0.7244	chr7_75432493_G_C_b38
UKB_20002_1065_self_reported_hypertension	region789	Lung	ENSG00000263001	0.509605	0.5176	chr7_74720592_C_T_b38
UKB_20002_1065_self_reported_hypertension	region789	Lung	ENSG00000272391	0.725026	0.3863	chr7_75465064_A_G_b38
UKB_20002_1065_self_reported_hypertension	region789	Lung	ENSG00000278416	0.703701	0.5439	chr7_75415153_T_C_b38
UKB_20002_1065_self_reported_hypertension	region834	Lung	ENSG00000164867	0.753228	0.9111	chr7_150993088_C_T_b38
UKB_20002_1065_self_reported_hypertension	region961	Lung	ENSG00000196196	0.999216	0.9994	chr9_35906474_C_T_b38
UKB_20002_1065_self_reported_hypertension	region1185	MuscleSkeletal	ENSG00000166532	0.481632	0.7582	chr12_8692897_A_G_b38
UKB_20002_1065_self_reported_hypertension	region1412	MuscleSkeletal	ENSG00000140465	0.430452	0.5345	chr15_74762525_G_C_b38
UKB_20002_1065_self_reported_hypertension	region1451	MuscleSkeletal	ENSG00000103510	0.328332	0.7329	chr16_31118574_A_G_b38
UKB_20002_1065_self_reported_hypertension	region1523	MuscleSkeletal	ENSG00000188878	0.380212	0.6962	chr17_75900218_C_T_b38
UKB_20002_1065_self_reported_hypertension	region1524	MuscleSkeletal	ENSG00000184640	0.977876	0.8948	chr17_77320798_A_G_b38
UKB_20002_1065_self_reported_hypertension	region360	MuscleSkeletal	ENSG00000158186	0.508226	0.7634	chr3_138352059_C_T_b38
UKB_20002_1065_self_reported_hypertension	region360	MuscleSkeletal	ENSG00000181322	0.375146	0.6383	chr3_138333912_C_T_b38
UKB_20002_1065_self_reported_hypertension	region599	MuscleSkeletal	ENSG00000170606	0.928494	0.8516	chr5_133091159_GTT_G_b38
UKB_20002_1065_self_reported_hypertension	region750	MuscleSkeletal	ENSG00000106392	0.376319	0.7304	chr7_7182276_C_T_b38
UKB_20002_1065_self_reported_hypertension	region789	MuscleSkeletal	ENSG00000205583	0.74733	0.8626	chr7_75432493_G_C_b38
UKB_20002_1065_self_reported_hypertension	region789	MuscleSkeletal	ENSG00000223705	0.714085	0.7411	chr7_75432493_G_C_b38
UKB_20002_1065_self_reported_hypertension	region789	MuscleSkeletal	ENSG00000263001	0.44215	0.566	chr7_74720592_C_T_b38
UKB_20002_1065_self_reported_hypertension	region789	MuscleSkeletal	ENSG00000278416	0.527243	0.604	chr7_75415153_T_C_b38
UKB_20002_1065_self_reported_hypertension	region961	MuscleSkeletal	ENSG00000196196	0.998977	0.9983	chr9_35906474_C_T_b38
UKB_20002_1065_self_reported_hypertension	region1451	Ovary	ENSG00000103510	0.476076	0.6332	chr16_31119853_G_A_b38
UKB_20002_1065_self_reported_hypertension	region1523	Ovary	ENSG00000188878	0.5715	0.6428	chr17_75942275_C_CA_b38
UKB_20002_1065_self_reported_hypertension	region1609	Ovary	ENSG00000105538	0.33096	0.4403	chr19_48717066_A_G_b38
UKB_20002_1065_self_reported_hypertension	region750	Ovary	ENSG00000106392	0.384136	0.4935	chr7_7237584_C_G_b38
UKB_20002_1065_self_reported_hypertension	region789	Ovary	ENSG00000205583	0.833334	0.7877	chr7_75432493_G_C_b38
UKB_20002_1065_self_reported_hypertension	region789	Ovary	ENSG00000263001	0.527025	0.5034	chr7_74720592_C_T_b38
UKB_20002_1065_self_reported_hypertension	region789	Ovary	ENSG00000278416	0.731945	0.6703	chr7_75429830_C_T_b38
UKB_20002_1065_self_reported_hypertension	region1185	Prostate	ENSG00000166532	0.474583	0.6484	chr12_8686781_C_G_b38
UKB_20002_1065_self_reported_hypertension	region1419	Prostate	ENSG00000182511	0.433417	0.3139	chr15_90884642_G_C_b38
UKB_20002_1065_self_reported_hypertension	region1523	Prostate	ENSG00000141569	0.470491	0.5714	chr17_75900218_C_T_b38
UKB_20002_1065_self_reported_hypertension	region1523	Prostate	ENSG00000188878	0.491841	0.627	chr17_75942275_C_CA_b38
UKB_20002_1065_self_reported_hypertension	region662	Prostate	ENSG00000171467	0.696375	0.6629	chr6_43381570_A_C_b38
UKB_20002_1065_self_reported_hypertension	region789	Prostate	ENSG00000127957	0.688867	0.4856	chr7_75532956_A_G_b38
UKB_20002_1065_self_reported_hypertension	region789	Prostate	ENSG00000205583	0.803236	0.7638	chr7_75432493_G_C_b38
UKB_20002_1065_self_reported_hypertension	region789	Prostate	ENSG00000223705	0.771053	0.7496	chr7_75432493_G_C_b38
UKB_20002_1065_self_reported_hypertension	region789	Prostate	ENSG00000263001	0.465742	0.4976	chr7_74720592_C_T_b38
UKB_20002_1065_self_reported_hypertension	region789	Prostate	ENSG00000272391	0.525694	0.3808	chr7_75470858_C_T_b38
UKB_20002_1065_self_reported_hypertension	region789	Prostate	ENSG00000278416	0.832066	0.78	chr7_75432493_G_C_b38
UKB_20002_1065_self_reported_hypertension	region1079	Testis	ENSG00000043591	0.776818	0.9155	chr10_114039136_A_G_b38
UKB_20002_1065_self_reported_hypertension	region1488	Testis	ENSG00000132510	0.411609	0.6443	chr17_7840475_C_T_b38
UKB_20002_1065_self_reported_hypertension	region1523	Testis	ENSG00000188878	0.366918	0.6096	chr17_75938049_G_A_b38
UKB_20002_1065_self_reported_hypertension	region1623	Testis	ENSG00000125899	0.873845	0.9569	chr20_10988382_A_G_b38
UKB_20002_1065_self_reported_hypertension	region1623	Testis	ENSG00000270792	0.869091	0.8855	chr20_10986566_T_G_b38
UKB_20002_1065_self_reported_hypertension	region1666	Testis	ENSG00000170262	0.99946	1	chr21_32298829_T_C_b38
UKB_20002_1065_self_reported_hypertension	region541	Testis	ENSG00000113389	0.627741	0.839	chr5_32831833_T_C_b38
UKB_20002_1065_self_reported_hypertension	region789	Testis	ENSG00000223705	0.672886	0.661	chr7_75432493_G_C_b38
UKB_20002_1065_self_reported_hypertension	region789	Testis	ENSG00000263001	0.353292	0.4585	chr7_74720592_C_T_b38
UKB_20002_1065_self_reported_hypertension	region789	Testis	ENSG00000278416	0.433531	0.4845	chr7_75415153_T_C_b38
UKB_20002_1065_self_reported_hypertension	region961	Testis	ENSG00000196196	0.99851	0.9993	chr9_35906474_C_T_b38
UKB_20002_1065_self_reported_hypertension	region1419	WholeBlood	ENSG00000182511	0.494422	0.4979	chr15_90885291_CT_C_b38
UKB_20002_1065_self_reported_hypertension	region1431	WholeBlood	ENSG00000140632	0.625679	0.6542	chr16_4855126_T_G_b38
UKB_20002_1065_self_reported_hypertension	region1451	WholeBlood	ENSG00000262766	0.415037	0.6417	chr16_31118574_A_G_b38
UKB_20002_1065_self_reported_hypertension	region1488	WholeBlood	ENSG00000132510	0.452078	0.7114	chr17_7840475_C_T_b38
UKB_20002_1065_self_reported_hypertension	region154	WholeBlood	ENSG00000115825	0.490211	0.7116	chr2_37279023_T_C_b38
UKB_20002_1065_self_reported_hypertension	region154	WholeBlood	ENSG00000218739	0.400544	0.5822	chr2_37238286_T_C_b38
UKB_20002_1065_self_reported_hypertension	region1609	WholeBlood	ENSG00000142233	0.351481	0.5615	chr19_48703205_C_T_b38
UKB_20002_1065_self_reported_hypertension	region599	WholeBlood	ENSG00000170606	0.952084	0.9164	chr5_133091159_GTT_G_b38
UKB_20002_1065_self_reported_hypertension	region789	WholeBlood	ENSG00000127957	0.739589	0.7015	chr7_75532956_A_G_b38
UKB_20002_1065_self_reported_hypertension	region789	WholeBlood	ENSG00000158517	0.434153	0.5276	chr7_74720592_C_T_b38
UKB_20002_1065_self_reported_hypertension	region789	WholeBlood	ENSG00000165178	0.707661	0.84	chr7_75432493_G_C_b38
UKB_20002_1065_self_reported_hypertension	region789	WholeBlood	ENSG00000205583	0.867847	0.855	chr7_75432493_G_C_b38
UKB_20002_1065_self_reported_hypertension	region789	WholeBlood	ENSG00000223705	0.787317	0.8272	chr7_75429830_C_T_b38
UKB_20002_1065_self_reported_hypertension	region789	WholeBlood	ENSG00000263001	0.515111	0.5562	chr7_74720592_C_T_b38
UKB_20002_1065_self_reported_hypertension	region789	WholeBlood	ENSG00000272391	0.705377	0.5379	chr7_75514466_C_T_b38
Astle_et_al_2016_Eosinophil_counts	region1027	BreastMammaryTissue	ENSG00000077420	0.438849	0.7073	chr10_26438463_G_GGGATAACAGAGGA_b38
Astle_et_al_2016_Eosinophil_counts	region1027	BreastMammaryTissue	ENSG00000233261	0.302918	0.3102	chr10_26436682_GGA_G_b38
Astle_et_al_2016_Eosinophil_counts	region1430	BreastMammaryTissue	ENSG00000276791	0.452035	0.6953	chr16_2778172_T_C_b38
Astle_et_al_2016_Eosinophil_counts	region1451	BreastMammaryTissue	ENSG00000149922	0.980973	0.9911	chr16_30091839_C_A_b38
Astle_et_al_2016_Eosinophil_counts	region1608	BreastMammaryTissue	ENSG00000125755	0.418135	0.6742	chr19_45863113_TCCG_T_b38
Astle_et_al_2016_Eosinophil_counts	region1691	BreastMammaryTissue	ENSG00000100365	0.644246	0.642	chr22_36862461_T_C_b38
Astle_et_al_2016_Eosinophil_counts	region428	BreastMammaryTissue	ENSG00000231160	0.664947	0.8391	chr4_38664197_G_A_b38
Astle_et_al_2016_Eosinophil_counts	region5	BreastMammaryTissue	ENSG00000232912	0.477486	0.6274	chr1_8424763_A_G_b38
Astle_et_al_2016_Eosinophil_counts	region657	BreastMammaryTissue	ENSG00000030110	0.848241	0.9029	chr6_33580313_A_AG_b38
Astle_et_al_2016_Eosinophil_counts	region819	BreastMammaryTissue	ENSG00000128604	0.677567	0.7755	chr7_128937860_C_CGCGGG_b38
Astle_et_al_2016_Eosinophil_counts	region1309	ColonTransverse	ENSG00000134882	0.516134	0.467	chr13_99196142_A_G_b38
Astle_et_al_2016_Eosinophil_counts	region1430	ColonTransverse	ENSG00000276791	0.551226	0.6743	chr16_2778172_T_C_b38
Astle_et_al_2016_Eosinophil_counts	region1451	ColonTransverse	ENSG00000090238	0.329442	0.4728	chr16_30095964_A_T_b38
Astle_et_al_2016_Eosinophil_counts	region1451	ColonTransverse	ENSG00000149922	0.987116	0.9899	chr16_30091839_C_A_b38
Astle_et_al_2016_Eosinophil_counts	region1463	ColonTransverse	ENSG00000072736	0.645986	0.745	chr16_67769358_C_T_b38
Astle_et_al_2016_Eosinophil_counts	region1578	ColonTransverse	ENSG00000167468	0.758509	0.8834	chr19_1105622_A_AG_b38
Astle_et_al_2016_Eosinophil_counts	region1608	ColonTransverse	ENSG00000125755	0.504468	0.6107	chr19_45861919_T_C_b38
Astle_et_al_2016_Eosinophil_counts	region428	ColonTransverse	ENSG00000231160	0.696685	0.7968	chr4_38661274_G_A_b38
Astle_et_al_2016_Eosinophil_counts	region657	ColonTransverse	ENSG00000030110	0.902302	0.896	chr6_33580313_A_AG_b38
Astle_et_al_2016_Eosinophil_counts	region761	ColonTransverse	ENSG00000179428	0.50926	0.4087	chr7_22725717_G_GTC_b38
Astle_et_al_2016_Eosinophil_counts	region819	ColonTransverse	ENSG00000128604	0.597815	0.7187	chr7_128935743_TCTTAGCTATTGCTC_T_b38
Astle_et_al_2016_Eosinophil_counts	region428	KidneyCortex	ENSG00000231160	0.556153	0.6435	chr4_38665125_G_A_b38
Astle_et_al_2016_Eosinophil_counts	region1127	Lung	ENSG00000149485	0.672828	0.4111	chr11_61813890_C_CG_b38
Astle_et_al_2016_Eosinophil_counts	region1430	Lung	ENSG00000276791	0.583184	0.688	chr16_2778172_T_C_b38
Astle_et_al_2016_Eosinophil_counts	region1451	Lung	ENSG00000090238	0.341121	0.4703	chr16_30095964_A_T_b38
Astle_et_al_2016_Eosinophil_counts	region1451	Lung	ENSG00000102886	0.930394	0.3463	chr16_30091839_C_A_b38
Astle_et_al_2016_Eosinophil_counts	region1578	Lung	ENSG00000167468	0.866757	0.9516	chr19_1104079_G_A_b38
Astle_et_al_2016_Eosinophil_counts	region1608	Lung	ENSG00000125755	0.468386	0.6121	chr19_45863113_TCCG_T_b38
Astle_et_al_2016_Eosinophil_counts	region1667	Lung	ENSG00000184221	0.559	0.6227	chr21_33067583_C_T_b38
Astle_et_al_2016_Eosinophil_counts	region1667	Lung	ENSG00000205927	0.377728	0.3073	chr21_33066900_A_G_b38
Astle_et_al_2016_Eosinophil_counts	region1691	Lung	ENSG00000100365	0.984012	0.9773	chr22_36862461_T_C_b38
Astle_et_al_2016_Eosinophil_counts	region428	Lung	ENSG00000231160	0.769903	0.8278	chr4_38664197_G_A_b38
Astle_et_al_2016_Eosinophil_counts	region5	Lung	ENSG00000142599	0.870262	0.8889	chr1_8444361_C_A_b38
Astle_et_al_2016_Eosinophil_counts	region5	Lung	ENSG00000232912	0.82188	0.8881	chr1_8424763_A_G_b38
Astle_et_al_2016_Eosinophil_counts	region657	Lung	ENSG00000030110	0.96297	0.9367	chr6_33573730_A_G_b38
Astle_et_al_2016_Eosinophil_counts	region819	Lung	ENSG00000128604	0.6234	0.7192	chr7_128937860_C_CGCGGG_b38
Astle_et_al_2016_Eosinophil_counts	region84	Lung	ENSG00000120337	0.609796	0.638	chr1_172827365_C_G_b38
Astle_et_al_2016_Eosinophil_counts	region84	Lung	ENSG00000226375	0.663811	0.4514	chr1_172822372_G_A_b38
Astle_et_al_2016_Eosinophil_counts	region1027	MuscleSkeletal	ENSG00000077420	0.379053	0.6733	chr10_26438463_G_GGGATAACAGAGGA_b38
Astle_et_al_2016_Eosinophil_counts	region1067	MuscleSkeletal	ENSG00000152804	0.309315	0.6105	chr10_92690476_G_T_b38
Astle_et_al_2016_Eosinophil_counts	region1127	MuscleSkeletal	ENSG00000134824	0.558067	0.768	chr11_61814184_G_A_b38
Astle_et_al_2016_Eosinophil_counts	region1127	MuscleSkeletal	ENSG00000149485	0.749037	0.8505	chr11_61813896_A_G_b38
Astle_et_al_2016_Eosinophil_counts	region1309	MuscleSkeletal	ENSG00000228889	0.563151	0.6705	chr13_99201658_CAGTT_C_b38
Astle_et_al_2016_Eosinophil_counts	region1451	MuscleSkeletal	ENSG00000149922	0.98309	0.991	chr16_30091839_C_A_b38
Astle_et_al_2016_Eosinophil_counts	region1578	MuscleSkeletal	ENSG00000167468	0.713739	0.9083	chr19_1105622_A_AG_b38
Astle_et_al_2016_Eosinophil_counts	region1578	MuscleSkeletal	ENSG00000180448	0.310202	0.6715	chr19_1083533_C_T_b38
Astle_et_al_2016_Eosinophil_counts	region197	MuscleSkeletal	ENSG00000153094	0.477216	0.6342	chr2_111118962_T_C_b38
Astle_et_al_2016_Eosinophil_counts	region428	MuscleSkeletal	ENSG00000231160	0.615972	0.8121	chr4_38665125_G_A_b38
Astle_et_al_2016_Eosinophil_counts	region453	MuscleSkeletal	ENSG00000249242	0.369695	0.4474	chr4_82633835_G_A_b38
Astle_et_al_2016_Eosinophil_counts	region577	MuscleSkeletal	ENSG00000248489	0.322424	0.5463	chr5_98930103_G_T_b38
Astle_et_al_2016_Eosinophil_counts	region5	MuscleSkeletal	ENSG00000232912	0.771182	0.8958	chr1_8424763_A_G_b38
Astle_et_al_2016_Eosinophil_counts	region657	MuscleSkeletal	ENSG00000030110	0.859672	0.9376	chr6_33579153_T_C_b38
Astle_et_al_2016_Eosinophil_counts	region819	MuscleSkeletal	ENSG00000128604	0.529276	0.7606	chr7_128935743_TCTTAGCTATTGCTC_T_b38
Astle_et_al_2016_Eosinophil_counts	region1127	Ovary	ENSG00000134824	0.447008	0.6761	chr11_61814184_G_A_b38
Astle_et_al_2016_Eosinophil_counts	region1130	Ovary	ENSG00000254461	0.518439	0.5504	chr11_66204143_A_G_b38
Astle_et_al_2016_Eosinophil_counts	region1430	Ovary	ENSG00000276791	0.473556	0.745	chr16_2778172_T_C_b38
Astle_et_al_2016_Eosinophil_counts	region1451	Ovary	ENSG00000149922	0.982488	0.9927	chr16_30091839_C_A_b38
Astle_et_al_2016_Eosinophil_counts	region1578	Ovary	ENSG00000167468	0.790587	0.9489	chr19_1104079_G_A_b38
Astle_et_al_2016_Eosinophil_counts	region1691	Ovary	ENSG00000100365	0.700532	0.982	chr22_36862461_T_C_b38
Astle_et_al_2016_Eosinophil_counts	region428	Ovary	ENSG00000231160	0.563849	0.8295	chr4_38665125_G_A_b38
Astle_et_al_2016_Eosinophil_counts	region5	Ovary	ENSG00000232912	0.511654	0.8858	chr1_8424763_A_G_b38
Astle_et_al_2016_Eosinophil_counts	region657	Ovary	ENSG00000030110	0.84051	0.9139	chr6_33580313_A_AG_b38
Astle_et_al_2016_Eosinophil_counts	region819	Ovary	ENSG00000128604	0.363995	0.7483	chr7_128937860_C_CGCGGG_b38
Astle_et_al_2016_Eosinophil_counts	region1067	Prostate	ENSG00000236493	0.309709	0.6701	chr10_92669710_C_T_b38
Astle_et_al_2016_Eosinophil_counts	region1430	Prostate	ENSG00000276791	0.506577	0.7294	chr16_2778172_T_C_b38
Astle_et_al_2016_Eosinophil_counts	region1578	Prostate	ENSG00000167468	0.780788	0.9523	chr19_1104079_G_A_b38
Astle_et_al_2016_Eosinophil_counts	region278	Prostate	ENSG00000091181	0.689475	0.6407	chr3_3111246_G_T_b38
Astle_et_al_2016_Eosinophil_counts	region428	Prostate	ENSG00000231160	0.669156	0.8228	chr4_38665125_G_A_b38
Astle_et_al_2016_Eosinophil_counts	region625	Prostate	ENSG00000213347	0.448096	0.6634	chr5_177339176_A_G_b38
Astle_et_al_2016_Eosinophil_counts	region657	Prostate	ENSG00000030110	0.884129	0.9144	chr6_33580313_A_AG_b38
Astle_et_al_2016_Eosinophil_counts	region819	Prostate	ENSG00000128604	0.41835	0.5782	chr7_128937860_C_CGCGGG_b38
Astle_et_al_2016_Eosinophil_counts	region1007	Testis	ENSG00000148396	0.358408	0.3617	chr9_136477772_T_C_b38
Astle_et_al_2016_Eosinophil_counts	region1010	Testis	ENSG00000229869	0.339312	0.4587	chr10_933873_C_T_b38
Astle_et_al_2016_Eosinophil_counts	region1067	Testis	ENSG00000152804	0.451559	0.5618	chr10_92669710_C_T_b38
Astle_et_al_2016_Eosinophil_counts	region1127	Testis	ENSG00000149485	0.588857	0.6646	chr11_61814184_G_A_b38
Astle_et_al_2016_Eosinophil_counts	region1430	Testis	ENSG00000276791	0.585243	0.6171	chr16_2778172_T_C_b38
Astle_et_al_2016_Eosinophil_counts	region148	Testis	ENSG00000163803	0.46968	0.6472	chr2_28461578_A_AAAAT_b38
Astle_et_al_2016_Eosinophil_counts	region1590	Testis	ENSG00000267275	0.645508	0.6884	chr19_16316364_A_G_b38
Astle_et_al_2016_Eosinophil_counts	region1607	Testis	ENSG00000283632	0.705761	0.772	chr19_45241794_C_CCA_b38
Astle_et_al_2016_Eosinophil_counts	region185	Testis	ENSG00000118640	0.419115	0.5248	chr2_85561615_C_A_b38
Astle_et_al_2016_Eosinophil_counts	region584	Testis	ENSG00000248428	0.392947	0.5402	chr5_111066174_T_C_b38
Astle_et_al_2016_Eosinophil_counts	region657	Testis	ENSG00000030110	0.788034	0.8307	chr6_33580313_A_AG_b38
Astle_et_al_2016_Eosinophil_counts	region761	Testis	ENSG00000179428	0.479974	0.4515	chr7_22725717_G_GTC_b38
Astle_et_al_2016_Eosinophil_counts	region819	Testis	ENSG00000128604	0.360141	0.6303	chr7_128937860_C_CGCGGG_b38
Astle_et_al_2016_Eosinophil_counts	region1007	WholeBlood	ENSG00000148396	0.343194	0.6979	chr9_136477772_T_C_b38
Astle_et_al_2016_Eosinophil_counts	region1010	WholeBlood	ENSG00000107929	0.494552	0.7472	chr10_933873_C_T_b38
Astle_et_al_2016_Eosinophil_counts	region1309	WholeBlood	ENSG00000134882	0.60385	0.8047	chr13_99201658_CAGTT_C_b38
Astle_et_al_2016_Eosinophil_counts	region1430	WholeBlood	ENSG00000276791	0.568535	0.8084	chr16_2778172_T_C_b38
Astle_et_al_2016_Eosinophil_counts	region1451	WholeBlood	ENSG00000149922	0.988311	0.9959	chr16_30091839_C_A_b38
Astle_et_al_2016_Eosinophil_counts	region1451	WholeBlood	ENSG00000250616	0.443253	0.604	chr16_30096460_A_G_b38
Astle_et_al_2016_Eosinophil_counts	region1463	WholeBlood	ENSG00000279649	0.460914	0.4972	chr16_68293014_G_A_b38
Astle_et_al_2016_Eosinophil_counts	region1523	WholeBlood	ENSG00000132478	0.328531	0.3678	chr17_75782435_CA_C_b38
Astle_et_al_2016_Eosinophil_counts	region1608	WholeBlood	ENSG00000125755	0.548527	0.7921	chr19_45857481_C_T_b38
Astle_et_al_2016_Eosinophil_counts	region1628	WholeBlood	ENSG00000125844	0.838567	0.7282	chr20_17689784_G_T_b38
Astle_et_al_2016_Eosinophil_counts	region1628	WholeBlood	ENSG00000125868	0.888998	0.9736	chr20_17647082_G_A_b38
Astle_et_al_2016_Eosinophil_counts	region1667	WholeBlood	ENSG00000184221	0.738624	0.8283	chr21_33069392_T_A_b38
Astle_et_al_2016_Eosinophil_counts	region1667	WholeBlood	ENSG00000205927	0.670622	0.7068	chr21_33060486_A_T_b38
Astle_et_al_2016_Eosinophil_counts	region1688	WholeBlood	ENSG00000100100	0.378887	0.7179	chr22_31276452_T_TCGG_b38
Astle_et_al_2016_Eosinophil_counts	region1691	WholeBlood	ENSG00000100362	0.983928	0.9944	chr22_36862461_T_C_b38
Astle_et_al_2016_Eosinophil_counts	region16	WholeBlood	ENSG00000179163	0.311338	0.6793	chr1_23874413_G_C_b38
Astle_et_al_2016_Eosinophil_counts	region185	WholeBlood	ENSG00000168890	0.504968	0.5103	chr2_85593178_A_T_b38
Astle_et_al_2016_Eosinophil_counts	region25	WholeBlood	ENSG00000127124	0.84853	0.9612	chr1_41902668_G_C_b38
Astle_et_al_2016_Eosinophil_counts	region394	WholeBlood	ENSG00000185112	0.750527	0.9338	chr3_194685776_C_G_b38
Astle_et_al_2016_Eosinophil_counts	region428	WholeBlood	ENSG00000231160	0.705561	0.9066	chr4_38661274_G_A_b38
Astle_et_al_2016_Eosinophil_counts	region577	WholeBlood	ENSG00000248489	0.397094	0.7061	chr5_98930103_G_T_b38
Astle_et_al_2016_Eosinophil_counts	region598	WholeBlood	ENSG00000234290	0.81153	0.6033	chr5_132468655_C_A_b38
Astle_et_al_2016_Eosinophil_counts	region5	WholeBlood	ENSG00000142599	0.833939	0.9509	chr1_8437247_T_A_b38
Astle_et_al_2016_Eosinophil_counts	region5	WholeBlood	ENSG00000232912	0.782471	0.9495	chr1_8424763_A_G_b38
Astle_et_al_2016_Eosinophil_counts	region603	WholeBlood	ENSG00000131507	0.364251	0.6899	chr5_142110854_CA_C_b38
Astle_et_al_2016_Eosinophil_counts	region606	WholeBlood	ENSG00000169252	0.353629	0.5863	chr5_148820990_G_A_b38
Astle_et_al_2016_Eosinophil_counts	region657	WholeBlood	ENSG00000030110	0.886698	0.9607	chr6_33580313_A_AG_b38
Astle_et_al_2016_Eosinophil_counts	region700	WholeBlood	ENSG00000178409	0.887515	0.8444	chr6_107121227_C_T_b38
Astle_et_al_2016_Eosinophil_counts	region73	WholeBlood	ENSG00000143384	0.866584	0.9753	chr1_150611627_G_T_b38
Astle_et_al_2016_Eosinophil_counts	region73	WholeBlood	ENSG00000203804	0.848214	0.974	chr1_150572164_C_T_b38
Astle_et_al_2016_Eosinophil_counts	region761	WholeBlood	ENSG00000179428	0.561212	0.4857	chr7_22726602_A_G_b38
Astle_et_al_2016_Eosinophil_counts	region819	WholeBlood	ENSG00000128604	0.79271	0.9163	chr7_128935743_TCTTAGCTATTGCTC_T_b38
Astle_et_al_2016_Eosinophil_counts	region980	WholeBlood	ENSG00000165030	0.53935	0.7677	chr9_91259305_C_T_b38
Astle_et_al_2016_Granulocyte_count	region1028	BreastMammaryTissue	ENSG00000254635	0.391796	0.6871	chr10_28531092_C_CAA_b38
Astle_et_al_2016_Granulocyte_count	region1219	BreastMammaryTissue	ENSG00000090382	0.479722	0.6283	chr12_69338325_T_C_b38
Astle_et_al_2016_Granulocyte_count	region1504	BreastMammaryTissue	ENSG00000008838	0.390072	0.3798	chr17_40021029_T_C_b38
Astle_et_al_2016_Granulocyte_count	region1583	BreastMammaryTissue	ENSG00000104938	0.676082	0.8517	chr19_7762944_G_A_b38
Astle_et_al_2016_Granulocyte_count	region1591	BreastMammaryTissue	ENSG00000175489	0.68698	0.3006	chr19_18402784_T_C_b38
Astle_et_al_2016_Granulocyte_count	region1609	BreastMammaryTissue	ENSG00000232871	0.77772	0.8917	chr19_48628507_A_AAG_b38
Astle_et_al_2016_Granulocyte_count	region233	BreastMammaryTissue	ENSG00000152254	0.838608	0.9438	chr2_168864871_A_G_b38
Astle_et_al_2016_Granulocyte_count	region561	BreastMammaryTissue	ENSG00000213830	0.523275	0.7794	chr5_69311457_C_G_b38
Astle_et_al_2016_Granulocyte_count	region598	BreastMammaryTissue	ENSG00000197375	0.831552	0.933	chr5_132369766_C_G_b38
Astle_et_al_2016_Granulocyte_count	region598	BreastMammaryTissue	ENSG00000233006	0.642869	0.908	chr5_132369766_C_G_b38
Astle_et_al_2016_Granulocyte_count	region627	BreastMammaryTissue	ENSG00000127022	0.58205	0.8612	chr5_179699089_C_T_b38
Astle_et_al_2016_Granulocyte_count	region864	BreastMammaryTissue	ENSG00000173535	0.453279	0.7643	chr8_23103191_G_C_b38
Astle_et_al_2016_Granulocyte_count	region1028	ColonTransverse	ENSG00000254635	0.358053	0.5725	chr10_28531841_TATGGAAAACGTTAGAAAGGG_T_b38
Astle_et_al_2016_Granulocyte_count	region1357	ColonTransverse	ENSG00000100580	0.45315	0.7475	chr14_77377471_T_C_b38
Astle_et_al_2016_Granulocyte_count	region1406	ColonTransverse	ENSG00000169118	0.458267	0.5885	chr15_64379803_G_A_b38
Astle_et_al_2016_Granulocyte_count	region1540	ColonTransverse	ENSG00000141452	0.403479	0.4524	chr18_23503774_C_T_b38
Astle_et_al_2016_Granulocyte_count	region1609	ColonTransverse	ENSG00000063176	0.743645	0.8872	chr19_48624233_C_T_b38
Astle_et_al_2016_Granulocyte_count	region1609	ColonTransverse	ENSG00000232871	0.691669	0.7471	chr19_48638149_AAGAC_A_b38
Astle_et_al_2016_Granulocyte_count	region233	ColonTransverse	ENSG00000152254	0.804543	0.9075	chr2_168887282_C_T_b38
Astle_et_al_2016_Granulocyte_count	region241	ColonTransverse	ENSG00000188452	0.734305	0.6357	chr2_181444109_T_C_b38
Astle_et_al_2016_Granulocyte_count	region561	ColonTransverse	ENSG00000183323	0.524842	0.7509	chr5_69311457_C_G_b38
Astle_et_al_2016_Granulocyte_count	region561	ColonTransverse	ENSG00000213830	0.538967	0.6485	chr5_69314058_G_T_b38
Astle_et_al_2016_Granulocyte_count	region598	ColonTransverse	ENSG00000197208	0.721356	0.7785	chr5_132316836_A_C_b38
Astle_et_al_2016_Granulocyte_count	region627	ColonTransverse	ENSG00000127022	0.683038	0.8492	chr5_179699631_C_T_b38
Astle_et_al_2016_Granulocyte_count	region653	ColonTransverse	ENSG00000206503	0.996955	0.9986	chr6_29955314_T_G_b38
Astle_et_al_2016_Granulocyte_count	region851	ColonTransverse	ENSG00000173295	0.672445	0.3832	chr8_8231411_T_C_b38
Astle_et_al_2016_Granulocyte_count	region851	ColonTransverse	ENSG00000253981	0.762907	0.5082	chr8_8237348_G_A_b38
Astle_et_al_2016_Granulocyte_count	region909	ColonTransverse	ENSG00000253669	0.357684	0.52	chr8_102829633_G_A_b38
Astle_et_al_2016_Granulocyte_count	region851	KidneyCortex	ENSG00000173295	0.647749	0.3701	chr8_8237348_G_A_b38
Astle_et_al_2016_Granulocyte_count	region1064	Lung	ENSG00000107798	0.428607	0.5341	chr10_89247603_T_G_b38
Astle_et_al_2016_Granulocyte_count	region1127	Lung	ENSG00000149485	0.675467	0.3385	chr11_61812288_T_C_b38
Astle_et_al_2016_Granulocyte_count	region1219	Lung	ENSG00000090382	0.986834	0.991	chr12_69338325_T_C_b38
Astle_et_al_2016_Granulocyte_count	region1357	Lung	ENSG00000100580	0.469169	0.7491	chr14_77382629_A_G_b38
Astle_et_al_2016_Granulocyte_count	region1357	Lung	ENSG00000165555	0.384791	0.3396	chr14_77416113_C_T_b38
Astle_et_al_2016_Granulocyte_count	region1487	Lung	ENSG00000072818	0.329318	0.5108	chr17_7337072_C_T_b38
Astle_et_al_2016_Granulocyte_count	region1504	Lung	ENSG00000008838	0.485708	0.4891	chr17_40013461_G_A_b38
Astle_et_al_2016_Granulocyte_count	region1540	Lung	ENSG00000141452	0.653825	0.6455	chr18_23503774_C_T_b38
Astle_et_al_2016_Granulocyte_count	region1609	Lung	ENSG00000232871	0.749185	0.6683	chr19_48638149_AAGAC_A_b38
Astle_et_al_2016_Granulocyte_count	region1653	Lung	ENSG00000243509	0.354718	0.5943	chr20_63706054_A_G_b38
Astle_et_al_2016_Granulocyte_count	region1671	Lung	ENSG00000205622	0.728357	0.5027	chr21_39093140_C_A_b38
Astle_et_al_2016_Granulocyte_count	region1679	Lung	ENSG00000015475	0.565072	0.5021	chr22_17686657_C_G_b38
Astle_et_al_2016_Granulocyte_count	region18	Lung	ENSG00000142765	0.587267	0.7928	chr1_27342119_C_T_b38
Astle_et_al_2016_Granulocyte_count	region233	Lung	ENSG00000152254	0.87169	0.9428	chr2_168864871_A_G_b38
Astle_et_al_2016_Granulocyte_count	region233	Lung	ENSG00000163072	0.796127	0.6028	chr2_168864871_A_G_b38
Astle_et_al_2016_Granulocyte_count	region271	Lung	ENSG00000144476	0.586734	0.4183	chr2_236872550_G_A_b38
Astle_et_al_2016_Granulocyte_count	region561	Lung	ENSG00000213830	0.316878	0.4776	chr5_69314058_G_T_b38
Astle_et_al_2016_Granulocyte_count	region598	Lung	ENSG00000197375	0.874428	0.9355	chr5_132369766_C_G_b38
Astle_et_al_2016_Granulocyte_count	region627	Lung	ENSG00000127022	0.664931	0.8215	chr5_179699089_C_T_b38
Astle_et_al_2016_Granulocyte_count	region657	Lung	ENSG00000023892	0.383893	0.5538	chr6_35299938_C_T_b38
Astle_et_al_2016_Granulocyte_count	region661	Lung	ENSG00000112561	0.783356	0.9338	chr6_41734881_C_A_b38
Astle_et_al_2016_Granulocyte_count	region66	Lung	ENSG00000085491	0.783029	0.8846	chr1_108199508_T_C_b38
Astle_et_al_2016_Granulocyte_count	region851	Lung	ENSG00000253893	0.604808	0.3169	chr8_8231355_G_C_b38
Astle_et_al_2016_Granulocyte_count	region851	Lung	ENSG00000253981	0.616138	0.5078	chr8_8237348_G_A_b38
Astle_et_al_2016_Granulocyte_count	region864	Lung	ENSG00000173535	0.394218	0.4973	chr8_23105246_G_A_b38
Astle_et_al_2016_Granulocyte_count	region1028	MuscleSkeletal	ENSG00000254635	0.300314	0.6517	chr10_28531092_C_CAA_b38
Astle_et_al_2016_Granulocyte_count	region1127	MuscleSkeletal	ENSG00000134824	0.401854	0.6502	chr11_61814184_G_A_b38
Astle_et_al_2016_Granulocyte_count	region1127	MuscleSkeletal	ENSG00000149485	0.800616	0.8935	chr11_61813896_A_G_b38
Astle_et_al_2016_Granulocyte_count	region1357	MuscleSkeletal	ENSG00000165555	0.388897	0.3407	chr14_77407228_C_T_b38
Astle_et_al_2016_Granulocyte_count	region1540	MuscleSkeletal	ENSG00000141452	0.516508	0.7627	chr18_23503774_C_T_b38
Astle_et_al_2016_Granulocyte_count	region1578	MuscleSkeletal	ENSG00000064666	0.710374	0.9516	chr19_1036019_G_A_b38
Astle_et_al_2016_Granulocyte_count	region1609	MuscleSkeletal	ENSG00000063176	0.538634	0.8217	chr19_48624233_C_T_b38
Astle_et_al_2016_Granulocyte_count	region1609	MuscleSkeletal	ENSG00000232871	0.762354	0.6496	chr19_48638149_AAGAC_A_b38
Astle_et_al_2016_Granulocyte_count	region1653	MuscleSkeletal	ENSG00000203896	0.302818	0.4415	chr20_63740795_G_C_b38
Astle_et_al_2016_Granulocyte_count	region1653	MuscleSkeletal	ENSG00000258366	0.697725	0.794	chr20_63676805_C_G_b38
Astle_et_al_2016_Granulocyte_count	region227	MuscleSkeletal	ENSG00000136536	0.318495	0.6536	chr2_159712765_C_T_b38
Astle_et_al_2016_Granulocyte_count	region387	MuscleSkeletal	ENSG00000114770	0.652467	0.832	chr3_183984301_A_G_b38
Astle_et_al_2016_Granulocyte_count	region453	MuscleSkeletal	ENSG00000249242	0.382266	0.5921	chr4_82633835_G_A_b38
Astle_et_al_2016_Granulocyte_count	region603	MuscleSkeletal	ENSG00000131507	0.309454	0.5925	chr5_142109462_G_T_b38
Astle_et_al_2016_Granulocyte_count	region627	MuscleSkeletal	ENSG00000127022	0.618728	0.8126	chr5_179699631_C_T_b38
Astle_et_al_2016_Granulocyte_count	region653	MuscleSkeletal	ENSG00000206503	0.996851	0.9986	chr6_29955314_T_G_b38
Astle_et_al_2016_Granulocyte_count	region657	MuscleSkeletal	ENSG00000065029	0.306703	0.5306	chr6_35260466_A_G_b38
Astle_et_al_2016_Granulocyte_count	region66	MuscleSkeletal	ENSG00000085491	0.858555	0.946	chr1_108199501_C_G_b38
Astle_et_al_2016_Granulocyte_count	region66	MuscleSkeletal	ENSG00000280186	0.499127	0.7515	chr1_108199152_T_A_b38
Astle_et_al_2016_Granulocyte_count	region1127	Ovary	ENSG00000134824	0.538902	0.6592	chr11_61813896_A_G_b38
Astle_et_al_2016_Granulocyte_count	region1357	Ovary	ENSG00000165555	0.394799	0.4201	chr14_77399271_A_G_b38
Astle_et_al_2016_Granulocyte_count	region1583	Ovary	ENSG00000268297	0.686979	0.8591	chr19_7786694_C_T_b38
Astle_et_al_2016_Granulocyte_count	region1609	Ovary	ENSG00000232871	0.631593	0.6313	chr19_48638149_AAGAC_A_b38
Astle_et_al_2016_Granulocyte_count	region233	Ovary	ENSG00000152254	0.813999	0.9151	chr2_168887282_C_T_b38
Astle_et_al_2016_Granulocyte_count	region561	Ovary	ENSG00000183323	0.43681	0.6859	chr5_69314611_G_C_b38
Astle_et_al_2016_Granulocyte_count	region657	Ovary	ENSG00000023892	0.315174	0.5057	chr6_35304497_C_T_b38
Astle_et_al_2016_Granulocyte_count	region851	Ovary	ENSG00000253893	0.520159	0.3073	chr8_8231355_G_C_b38
Astle_et_al_2016_Granulocyte_count	region1127	Prostate	ENSG00000149485	0.513676	0.3661	chr11_61828850_CA_C_b38
Astle_et_al_2016_Granulocyte_count	region1219	Prostate	ENSG00000090382	0.950317	0.6495	chr12_69338325_T_C_b38
Astle_et_al_2016_Granulocyte_count	region1219	Prostate	ENSG00000127337	0.306688	0.4747	chr12_69360409_G_A_b38
Astle_et_al_2016_Granulocyte_count	region1609	Prostate	ENSG00000063176	0.481438	0.6767	chr19_48624233_C_T_b38
Astle_et_al_2016_Granulocyte_count	region1609	Prostate	ENSG00000232871	0.726483	0.6427	chr19_48638149_AAGAC_A_b38
Astle_et_al_2016_Granulocyte_count	region1653	Prostate	ENSG00000203896	0.345222	0.4523	chr20_63732517_G_A_b38
Astle_et_al_2016_Granulocyte_count	region233	Prostate	ENSG00000152253	0.791246	0.9072	chr2_168864871_A_G_b38
Astle_et_al_2016_Granulocyte_count	region233	Prostate	ENSG00000152254	0.832309	0.9281	chr2_168864871_A_G_b38
Astle_et_al_2016_Granulocyte_count	region561	Prostate	ENSG00000183323	0.481855	0.7166	chr5_69308538_C_T_b38
Astle_et_al_2016_Granulocyte_count	region598	Prostate	ENSG00000197375	0.308481	0.826	chr5_132369766_C_G_b38
Astle_et_al_2016_Granulocyte_count	region79	Prostate	ENSG00000143226	0.365286	0.4041	chr1_161624168_C_T_b38
Astle_et_al_2016_Granulocyte_count	region1026	Testis	ENSG00000099256	0.642599	0.6547	chr10_24925121_A_C_b38
Astle_et_al_2016_Granulocyte_count	region1127	Testis	ENSG00000149485	0.434061	0.4938	chr11_61814184_G_A_b38
Astle_et_al_2016_Granulocyte_count	region1219	Testis	ENSG00000090382	0.513499	0.3812	chr12_69338325_T_C_b38
Astle_et_al_2016_Granulocyte_count	region1357	Testis	ENSG00000100583	0.479224	0.6405	chr14_77384635_C_T_b38
Astle_et_al_2016_Granulocyte_count	region1523	Testis	ENSG00000186074	0.865122	0.9015	chr17_74703245_C_A_b38
Astle_et_al_2016_Granulocyte_count	region1583	Testis	ENSG00000268297	0.613463	0.7751	chr19_7781672_G_A_b38
Astle_et_al_2016_Granulocyte_count	region1607	Testis	ENSG00000283632	0.662581	0.751	chr19_45241584_A_G_b38
Astle_et_al_2016_Granulocyte_count	region561	Testis	ENSG00000183323	0.399759	0.4917	chr5_69308538_C_T_b38
Astle_et_al_2016_Granulocyte_count	region66	Testis	ENSG00000085491	0.647782	0.7717	chr1_108199508_T_C_b38
Astle_et_al_2016_Granulocyte_count	region1007	WholeBlood	ENSG00000148396	0.394318	0.6652	chr9_136477772_T_C_b38
Astle_et_al_2016_Granulocyte_count	region1064	WholeBlood	ENSG00000107798	0.845545	0.95	chr10_89243170_C_T_b38
Astle_et_al_2016_Granulocyte_count	region1070	WholeBlood	ENSG00000187122	0.303615	0.639	chr10_97224198_G_A_b38
Astle_et_al_2016_Granulocyte_count	region116	WholeBlood	ENSG00000143801	0.314971	0.6392	chr1_226987544_C_CT_b38
Astle_et_al_2016_Granulocyte_count	region1219	WholeBlood	ENSG00000090382	0.986387	0.9956	chr12_69338325_T_C_b38
Astle_et_al_2016_Granulocyte_count	region1353	WholeBlood	ENSG00000185650	0.499072	0.822	chr14_68719944_A_C_b38
Astle_et_al_2016_Granulocyte_count	region1353	WholeBlood	ENSG00000258623	0.691383	0.9125	chr14_68713254_C_T_b38
Astle_et_al_2016_Granulocyte_count	region1357	WholeBlood	ENSG00000100580	0.604393	0.8725	chr14_77377471_T_C_b38
Astle_et_al_2016_Granulocyte_count	region1357	WholeBlood	ENSG00000100583	0.565831	0.8849	chr14_77378526_A_G_b38
Astle_et_al_2016_Granulocyte_count	region1357	WholeBlood	ENSG00000165555	0.442429	0.4796	chr14_77421338_C_T_b38
Astle_et_al_2016_Granulocyte_count	region1427	WholeBlood	ENSG00000131873	0.721403	0.913	chr15_101208405_TA_T_b38
Astle_et_al_2016_Granulocyte_count	region1430	WholeBlood	ENSG00000213918	0.332249	0.6431	chr16_3622586_G_C_b38
Astle_et_al_2016_Granulocyte_count	region1430	WholeBlood	ENSG00000276754	0.568315	0.7248	chr16_3688077_C_T_b38
Astle_et_al_2016_Granulocyte_count	region1487	WholeBlood	ENSG00000072818	0.935922	0.9836	chr17_7337072_C_T_b38
Astle_et_al_2016_Granulocyte_count	region1504	WholeBlood	ENSG00000008838	0.43928	0.3211	chr17_40012842_T_C_b38
Astle_et_al_2016_Granulocyte_count	region1540	WholeBlood	ENSG00000141452	0.640892	0.8636	chr18_23503774_C_T_b38
Astle_et_al_2016_Granulocyte_count	region1606	WholeBlood	ENSG00000105767	0.985993	0.9882	chr19_43648948_A_G_b38
Astle_et_al_2016_Granulocyte_count	region1609	WholeBlood	ENSG00000063176	0.803071	0.9248	chr19_48628507_A_AAG_b38
Astle_et_al_2016_Granulocyte_count	region1609	WholeBlood	ENSG00000063180	0.692031	0.8862	chr19_48645524_C_T_b38
Astle_et_al_2016_Granulocyte_count	region1609	WholeBlood	ENSG00000232871	0.755864	0.8211	chr19_48638149_AAGAC_A_b38
Astle_et_al_2016_Granulocyte_count	region1653	WholeBlood	ENSG00000101246	0.46416	0.795	chr20_63707707_C_G_b38
Astle_et_al_2016_Granulocyte_count	region1653	WholeBlood	ENSG00000203896	0.392754	0.4941	chr20_63718234_A_G_b38
Astle_et_al_2016_Granulocyte_count	region1671	WholeBlood	ENSG00000157557	0.780104	0.8498	chr21_39092998_G_C_b38
Astle_et_al_2016_Granulocyte_count	region1671	WholeBlood	ENSG00000232837	0.746775	0.6878	chr21_39095717_T_C_b38
Astle_et_al_2016_Granulocyte_count	region1671	WholeBlood	ENSG00000235888	0.722254	0.7737	chr21_39095717_T_C_b38
Astle_et_al_2016_Granulocyte_count	region1671	WholeBlood	ENSG00000237721	0.797978	0.8627	chr21_39094373_G_T_b38
Astle_et_al_2016_Granulocyte_count	region173	WholeBlood	ENSG00000198369	0.523225	0.8588	chr2_65432900_GT_G_b38
Astle_et_al_2016_Granulocyte_count	region18	WholeBlood	ENSG00000142733	0.836909	0.9435	chr1_27369839_T_C_b38
Astle_et_al_2016_Granulocyte_count	region18	WholeBlood	ENSG00000142765	0.940254	0.8716	chr1_27342119_C_T_b38
Astle_et_al_2016_Granulocyte_count	region241	WholeBlood	ENSG00000115232	0.827316	0.9493	chr2_181459315_G_GT_b38
Astle_et_al_2016_Granulocyte_count	region241	WholeBlood	ENSG00000188452	0.819112	0.9407	chr2_181459459_CTT_C_b38
Astle_et_al_2016_Granulocyte_count	region361	WholeBlood	ENSG00000155893	0.574553	0.8381	chr3_141226870_A_G_b38
Astle_et_al_2016_Granulocyte_count	region387	WholeBlood	ENSG00000114770	0.419852	0.851	chr3_183990617_A_G_b38
Astle_et_al_2016_Granulocyte_count	region399	WholeBlood	ENSG00000169026	0.698098	0.9226	chr4_709923_A_G_b38
Astle_et_al_2016_Granulocyte_count	region399	WholeBlood	ENSG00000185619	0.655831	0.9039	chr4_709923_A_G_b38
Astle_et_al_2016_Granulocyte_count	region598	WholeBlood	ENSG00000197208	0.652694	0.6073	chr5_132328945_T_A_b38
Astle_et_al_2016_Granulocyte_count	region598	WholeBlood	ENSG00000197375	0.863453	0.9519	chr5_132369766_C_G_b38
Astle_et_al_2016_Granulocyte_count	region603	WholeBlood	ENSG00000131507	0.374113	0.7518	chr5_142110854_CA_C_b38
Astle_et_al_2016_Granulocyte_count	region606	WholeBlood	ENSG00000169252	0.711511	0.7844	chr5_148820990_G_A_b38
Astle_et_al_2016_Granulocyte_count	region623	WholeBlood	ENSG00000113742	0.948275	0.9874	chr5_173778279_A_G_b38
Astle_et_al_2016_Granulocyte_count	region642	WholeBlood	ENSG00000124788	0.811555	0.9015	chr6_16754135_G_A_b38
Astle_et_al_2016_Granulocyte_count	region657	WholeBlood	ENSG00000023892	0.367335	0.6673	chr6_35294213_C_T_b38
Astle_et_al_2016_Granulocyte_count	region657	WholeBlood	ENSG00000065029	0.315701	0.3992	chr6_35260438_G_T_b38
Astle_et_al_2016_Granulocyte_count	region657	WholeBlood	ENSG00000236104	0.487454	0.4301	chr6_33315989_T_C_b38
Astle_et_al_2016_Granulocyte_count	region66	WholeBlood	ENSG00000085491	0.869584	0.967	chr1_108199501_C_G_b38
Astle_et_al_2016_Granulocyte_count	region751	WholeBlood	ENSG00000106415	0.410597	0.7463	chr7_7982015_C_T_b38
Astle_et_al_2016_Granulocyte_count	region764	WholeBlood	ENSG00000153814	1	1	chr7_28237488_C_G_b38
Astle_et_al_2016_Granulocyte_count	region764	WholeBlood	ENSG00000234336	1	1	chr7_28237488_C_G_b38
Astle_et_al_2016_Granulocyte_count	region765	WholeBlood	ENSG00000146592	1	0.9998	chr7_28684757_G_T_b38
Astle_et_al_2016_Granulocyte_count	region79	WholeBlood	ENSG00000072694	0.398832	0.4451	chr1_161619537_G_A_b38
Astle_et_al_2016_Granulocyte_count	region79	WholeBlood	ENSG00000213075	0.344085	0.6199	chr1_161638511_T_C_b38
Astle_et_al_2016_Granulocyte_count	region864	WholeBlood	ENSG00000120889	0.516934	0.8404	chr8_23103191_G_C_b38
Astle_et_al_2016_Granulocyte_count	region864	WholeBlood	ENSG00000173535	0.453085	0.3511	chr8_23103191_G_C_b38
Astle_et_al_2016_Granulocyte_count	region932	WholeBlood	ENSG00000022567	0.910303	0.9791	chr8_141327635_G_A_b38
Astle_et_al_2016_Granulocyte_count	region932	WholeBlood	ENSG00000253595	0.894988	0.9686	chr8_141327635_G_A_b38
Astle_et_al_2016_High_light_scatter_reticulocyte_count	region1008	BreastMammaryTissue	ENSG00000188566	0.979904	0.991	chr9_137205865_C_G_b38
Astle_et_al_2016_High_light_scatter_reticulocyte_count	region1324	BreastMammaryTissue	ENSG00000279656	0.867587	0.9583	chr14_23025068_A_G_b38
Astle_et_al_2016_High_light_scatter_reticulocyte_count	region1376	BreastMammaryTissue	ENSG00000183828	0.436905	0.7378	chr14_105177282_G_A_b38
Astle_et_al_2016_High_light_scatter_reticulocyte_count	region1686	BreastMammaryTissue	ENSG00000186998	0.302542	0.3174	chr22_29236269_A_C_b38
Astle_et_al_2016_High_light_scatter_reticulocyte_count	region1701	BreastMammaryTissue	ENSG00000251322	0.389282	0.3488	chr22_50669644_G_A_b38
Astle_et_al_2016_High_light_scatter_reticulocyte_count	region549	BreastMammaryTissue	ENSG00000152684	0.374448	0.8651	chr5_52800100_C_A_b38
Astle_et_al_2016_High_light_scatter_reticulocyte_count	region598	BreastMammaryTissue	ENSG00000233006	0.31544	0.5671	chr5_132366428_G_A_b38
Astle_et_al_2016_High_light_scatter_reticulocyte_count	region788	BreastMammaryTissue	ENSG00000009950	0.754657	0.8863	chr7_73625076_C_G_b38
Astle_et_al_2016_High_light_scatter_reticulocyte_count	region1129	ColonTransverse	ENSG00000213445	0.935063	0.9804	chr11_65638129_G_T_b38
Astle_et_al_2016_High_light_scatter_reticulocyte_count	region1324	ColonTransverse	ENSG00000100804	0.653371	0.8488	chr14_23022075_C_G_b38
Astle_et_al_2016_High_light_scatter_reticulocyte_count	region1324	ColonTransverse	ENSG00000279656	0.83939	0.9508	chr14_23025068_A_G_b38
Astle_et_al_2016_High_light_scatter_reticulocyte_count	region1480	ColonTransverse	ENSG00000103335	0.969316	0.9717	chr16_88792238_T_G_b38
Astle_et_al_2016_High_light_scatter_reticulocyte_count	region665	ColonTransverse	ENSG00000270761	0.32622	0.6743	chr6_47477281_C_T_b38
Astle_et_al_2016_High_light_scatter_reticulocyte_count	region1324	KidneyCortex	ENSG00000279656	0.85455	0.9188	chr14_23025068_A_G_b38
Astle_et_al_2016_High_light_scatter_reticulocyte_count	region1059	Lung	ENSG00000165424	0.485796	0.6456	chr10_79373095_G_A_b38
Astle_et_al_2016_High_light_scatter_reticulocyte_count	region1129	Lung	ENSG00000213445	0.882407	0.9729	chr11_65638129_G_T_b38
Astle_et_al_2016_High_light_scatter_reticulocyte_count	region1164	Lung	ENSG00000110395	0.334418	0.6289	chr11_119226075_T_G_b38
Astle_et_al_2016_High_light_scatter_reticulocyte_count	region1252	Lung	ENSG00000250091	0.301082	0.3634	chr12_123935529_C_CAGGA_b38
Astle_et_al_2016_High_light_scatter_reticulocyte_count	region1324	Lung	ENSG00000100804	0.823561	0.9131	chr14_23025839_T_C_b38
Astle_et_al_2016_High_light_scatter_reticulocyte_count	region1324	Lung	ENSG00000279656	0.870102	0.9463	chr14_23025068_A_G_b38
Astle_et_al_2016_High_light_scatter_reticulocyte_count	region1376	Lung	ENSG00000183828	0.54424	0.7199	chr14_105175439_CGGCTCACCGCAACCTCCGCCTCCTGGGTTCA_C_b38
Astle_et_al_2016_High_light_scatter_reticulocyte_count	region1701	Lung	ENSG00000177989	0.348496	0.6171	chr22_50532837_T_C_b38
Astle_et_al_2016_High_light_scatter_reticulocyte_count	region395	Lung	ENSG00000072274	0.51196	0.7111	chr3_196082264_C_A_b38
Astle_et_al_2016_High_light_scatter_reticulocyte_count	region642	Lung	ENSG00000137198	0.849684	0.913	chr6_16282287_AG_A_b38
Astle_et_al_2016_High_light_scatter_reticulocyte_count	region665	Lung	ENSG00000270761	0.371588	0.6612	chr6_47477281_C_T_b38
Astle_et_al_2016_High_light_scatter_reticulocyte_count	region788	Lung	ENSG00000009950	0.798402	0.9271	chr7_73625076_C_G_b38
Astle_et_al_2016_High_light_scatter_reticulocyte_count	region788	Lung	ENSG00000274080	0.350596	0.3347	chr7_73612048_C_T_b38
Astle_et_al_2016_High_light_scatter_reticulocyte_count	region960	Lung	ENSG00000137073	0.360623	0.417	chr9_34078644_G_A_b38
Astle_et_al_2016_High_light_scatter_reticulocyte_count	region1008	MuscleSkeletal	ENSG00000188566	0.999462	0.9997	chr9_137205865_C_G_b38
Astle_et_al_2016_High_light_scatter_reticulocyte_count	region1164	MuscleSkeletal	ENSG00000160703	0.305082	0.4028	chr11_119249650_GTTTC_G_b38
Astle_et_al_2016_High_light_scatter_reticulocyte_count	region1252	MuscleSkeletal	ENSG00000250091	0.312101	0.4739	chr12_123946502_G_A_b38
Astle_et_al_2016_High_light_scatter_reticulocyte_count	region1252	MuscleSkeletal	ENSG00000270028	0.307405	0.5486	chr12_123924955_G_A_b38
Astle_et_al_2016_High_light_scatter_reticulocyte_count	region1324	MuscleSkeletal	ENSG00000100804	0.768971	0.9169	chr14_23022075_C_G_b38
Astle_et_al_2016_High_light_scatter_reticulocyte_count	region1324	MuscleSkeletal	ENSG00000279656	0.860168	0.9574	chr14_23025068_A_G_b38
Astle_et_al_2016_High_light_scatter_reticulocyte_count	region1376	MuscleSkeletal	ENSG00000183828	0.379472	0.6661	chr14_105182626_T_A_b38
Astle_et_al_2016_High_light_scatter_reticulocyte_count	region1376	MuscleSkeletal	ENSG00000184916	0.315284	0.6057	chr14_105177814_T_C_b38
Astle_et_al_2016_High_light_scatter_reticulocyte_count	region1498	MuscleSkeletal	ENSG00000132591	0.564141	0.8344	chr17_28860002_T_G_b38
Astle_et_al_2016_High_light_scatter_reticulocyte_count	region1701	MuscleSkeletal	ENSG00000025770	0.3205	0.6196	chr22_50523425_T_C_b38
Astle_et_al_2016_High_light_scatter_reticulocyte_count	region1701	MuscleSkeletal	ENSG00000251322	0.509921	0.3569	chr22_50661434_C_T_b38
Astle_et_al_2016_High_light_scatter_reticulocyte_count	region197	MuscleSkeletal	ENSG00000153094	0.327541	0.6419	chr2_111118962_T_C_b38
Astle_et_al_2016_High_light_scatter_reticulocyte_count	region310	MuscleSkeletal	ENSG00000214706	0.909814	0.9203	chr3_50292395_A_G_b38
Astle_et_al_2016_High_light_scatter_reticulocyte_count	region598	MuscleSkeletal	ENSG00000233006	0.311574	0.62	chr5_132333571_G_A_b38
Astle_et_al_2016_High_light_scatter_reticulocyte_count	region765	MuscleSkeletal	ENSG00000006625	0.313933	0.8093	chr7_30473122_G_A_b38
Astle_et_al_2016_High_light_scatter_reticulocyte_count	region1324	Ovary	ENSG00000279656	0.862129	0.9515	chr14_23025068_A_G_b38
Astle_et_al_2016_High_light_scatter_reticulocyte_count	region788	Ovary	ENSG00000009950	0.394578	0.7171	chr7_73625076_C_G_b38
Astle_et_al_2016_High_light_scatter_reticulocyte_count	region1324	Prostate	ENSG00000279656	0.841284	0.9261	chr14_23025068_A_G_b38
Astle_et_al_2016_High_light_scatter_reticulocyte_count	region665	Prostate	ENSG00000270761	0.337019	0.6078	chr6_47477281_C_T_b38
Astle_et_al_2016_High_light_scatter_reticulocyte_count	region788	Prostate	ENSG00000009950	0.567933	0.5369	chr7_73612048_C_T_b38
Astle_et_al_2016_High_light_scatter_reticulocyte_count	region932	Prostate	ENSG00000022567	0.574974	0.8045	chr8_141216009_C_T_b38
Astle_et_al_2016_High_light_scatter_reticulocyte_count	region1026	Testis	ENSG00000099256	0.631541	0.5059	chr10_24929314_G_T_b38
Astle_et_al_2016_High_light_scatter_reticulocyte_count	region1324	Testis	ENSG00000279656	0.847795	0.9215	chr14_23025068_A_G_b38
Astle_et_al_2016_High_light_scatter_reticulocyte_count	region1376	Testis	ENSG00000183828	0.487282	0.6938	chr14_105175439_CGGCTCACCGCAACCTCCGCCTCCTGGGTTCA_C_b38
Astle_et_al_2016_High_light_scatter_reticulocyte_count	region1476	Testis	ENSG00000103194	0.404125	0.5563	chr16_84749144_A_C_b38
Astle_et_al_2016_High_light_scatter_reticulocyte_count	region1480	Testis	ENSG00000103335	0.641183	0.8326	chr16_88792238_T_G_b38
Astle_et_al_2016_High_light_scatter_reticulocyte_count	region1526	Testis	ENSG00000141543	0.592428	0.5179	chr17_80138078_T_C_b38
Astle_et_al_2016_High_light_scatter_reticulocyte_count	region1568	Testis	ENSG00000150637	0.368418	0.557	chr18_69869381_T_C_b38
Astle_et_al_2016_High_light_scatter_reticulocyte_count	region1701	Testis	ENSG00000272821	0.314347	0.5412	chr22_50524353_C_G_b38
Astle_et_al_2016_High_light_scatter_reticulocyte_count	region308	Testis	ENSG00000088727	0.514835	0.7003	chr3_47263902_G_A_b38
Astle_et_al_2016_High_light_scatter_reticulocyte_count	region73	Testis	ENSG00000143412	0.775098	0.8767	chr1_150982195_G_A_b38
Astle_et_al_2016_High_light_scatter_reticulocyte_count	region788	Testis	ENSG00000009950	0.824487	0.8998	chr7_73625076_C_G_b38
Astle_et_al_2016_High_light_scatter_reticulocyte_count	region788	Testis	ENSG00000274080	0.817342	0.8977	chr7_73627755_C_T_b38
Astle_et_al_2016_High_light_scatter_reticulocyte_count	region1008	WholeBlood	ENSG00000188566	0.991466	0.9959	chr9_137205865_C_G_b38
Astle_et_al_2016_High_light_scatter_reticulocyte_count	region1129	WholeBlood	ENSG00000213445	0.820632	0.8929	chr11_65638129_G_T_b38
Astle_et_al_2016_High_light_scatter_reticulocyte_count	region1324	WholeBlood	ENSG00000279656	0.882995	0.9613	chr14_23025068_A_G_b38
Astle_et_al_2016_High_light_scatter_reticulocyte_count	region1376	WholeBlood	ENSG00000183828	0.582569	0.7977	chr14_105175439_CGGCTCACCGCAACCTCCGCCTCCTGGGTTCA_C_b38
Astle_et_al_2016_High_light_scatter_reticulocyte_count	region1439	WholeBlood	ENSG00000103342	0.979651	0.9896	chr16_11927629_G_A_b38
Astle_et_al_2016_High_light_scatter_reticulocyte_count	region14	WholeBlood	ENSG00000076864	0.953717	0.9707	chr1_21687978_G_T_b38
Astle_et_al_2016_High_light_scatter_reticulocyte_count	region1500	WholeBlood	ENSG00000006042	0.376996	0.3018	chr17_32903075_A_C_b38
Astle_et_al_2016_High_light_scatter_reticulocyte_count	region1500	WholeBlood	ENSG00000176658	0.45448	0.8167	chr17_32860198_G_C_b38
Astle_et_al_2016_High_light_scatter_reticulocyte_count	region154	WholeBlood	ENSG00000115808	0.57116	0.8776	chr2_36965464_T_C_b38
Astle_et_al_2016_High_light_scatter_reticulocyte_count	region1568	WholeBlood	ENSG00000206052	0.399449	0.6788	chr18_69851843_C_T_b38
Astle_et_al_2016_High_light_scatter_reticulocyte_count	region1586	WholeBlood	ENSG00000197256	0.343089	0.3699	chr19_11187179_C_A_b38
Astle_et_al_2016_High_light_scatter_reticulocyte_count	region1586	WholeBlood	ENSG00000267082	0.421291	0.4899	chr19_11185963_T_C_b38
Astle_et_al_2016_High_light_scatter_reticulocyte_count	region1619	WholeBlood	ENSG00000088826	0.883874	0.7449	chr20_4176425_C_G_b38
Astle_et_al_2016_High_light_scatter_reticulocyte_count	region16	WholeBlood	ENSG00000057757	0.303829	0.5567	chr1_23773733_C_T_b38
Astle_et_al_2016_High_light_scatter_reticulocyte_count	region27	WholeBlood	ENSG00000117448	0.380317	0.6605	chr1_45551015_T_C_b38
Astle_et_al_2016_High_light_scatter_reticulocyte_count	region2	WholeBlood	ENSG00000130764	0.999914	0.9982	chr1_3774964_A_G_b38
Astle_et_al_2016_High_light_scatter_reticulocyte_count	region2	WholeBlood	ENSG00000235169	1	0.9996	chr1_3774964_A_G_b38
Astle_et_al_2016_High_light_scatter_reticulocyte_count	region598	WholeBlood	ENSG00000197375	0.303545	0.4939	chr5_132368084_T_C_b38
Astle_et_al_2016_High_light_scatter_reticulocyte_count	region635	WholeBlood	ENSG00000216863	0.88059	0.6938	chr6_6682429_A_C_b38
Astle_et_al_2016_High_light_scatter_reticulocyte_count	region635	WholeBlood	ENSG00000261211	0.915461	0.9721	chr6_6682429_A_C_b38
Astle_et_al_2016_High_light_scatter_reticulocyte_count	region635	WholeBlood	ENSG00000279368	0.926633	0.9774	chr6_6682429_A_C_b38
Astle_et_al_2016_High_light_scatter_reticulocyte_count	region653	WholeBlood	ENSG00000235290	0.999988	0.992	chr6_30109452_A_G_b38
Astle_et_al_2016_High_light_scatter_reticulocyte_count	region717	WholeBlood	ENSG00000079950	0.365482	0.3525	chr6_132513379_C_T_b38
Astle_et_al_2016_High_light_scatter_reticulocyte_count	region855	WholeBlood	ENSG00000079459	0.58229	0.6145	chr8_11805659_T_TTC_b38
Astle_et_al_2016_High_light_scatter_reticulocyte_count	region932	WholeBlood	ENSG00000254019	0.607994	0.7412	chr8_141206778_C_T_b38
Astle_et_al_2016_Lymphocyte_counts	region1008	BreastMammaryTissue	ENSG00000180539	0.437388	0.3178	chr9_137029055_C_CA_b38
Astle_et_al_2016_Lymphocyte_counts	region1054	BreastMammaryTissue	ENSG00000156510	0.559516	0.7423	chr10_69220168_A_T_b38
Astle_et_al_2016_Lymphocyte_counts	region1184	BreastMammaryTissue	ENSG00000256433	0.868173	0.7972	chr12_6394334_G_C_b38
Astle_et_al_2016_Lymphocyte_counts	region1252	BreastMammaryTissue	ENSG00000183955	0.305409	0.6487	chr12_123388695_C_T_b38
Astle_et_al_2016_Lymphocyte_counts	region1350	BreastMammaryTissue	ENSG00000259116	0.301405	0.6013	chr14_64531248_T_A_b38
Astle_et_al_2016_Lymphocyte_counts	region1589	BreastMammaryTissue	ENSG00000072958	0.301817	0.4564	chr19_16194017_T_C_b38
Astle_et_al_2016_Lymphocyte_counts	region1606	BreastMammaryTissue	ENSG00000105771	0.365158	0.5787	chr19_43754925_C_T_b38
Astle_et_al_2016_Lymphocyte_counts	region1655	BreastMammaryTissue	ENSG00000229425	0.458244	0.7349	chr21_15434390_C_T_b38
Astle_et_al_2016_Lymphocyte_counts	region361	BreastMammaryTissue	ENSG00000177311	0.597035	0.6813	chr3_141406344_A_G_b38
Astle_et_al_2016_Lymphocyte_counts	region597	BreastMammaryTissue	ENSG00000245937	0.646728	0.8249	chr5_128070567_G_T_b38
Astle_et_al_2016_Lymphocyte_counts	region5	BreastMammaryTissue	ENSG00000232912	0.40825	0.5199	chr1_8424763_A_G_b38
Astle_et_al_2016_Lymphocyte_counts	region711	BreastMammaryTissue	ENSG00000279453	0.502315	0.7801	chr6_122440739_T_C_b38
Astle_et_al_2016_Lymphocyte_counts	region715	BreastMammaryTissue	ENSG00000198945	0.634254	0.8408	chr6_130053316_T_A_b38
Astle_et_al_2016_Lymphocyte_counts	region854	BreastMammaryTissue	ENSG00000183638	0.560786	0.8767	chr8_10718205_G_A_b38
Astle_et_al_2016_Lymphocyte_counts	region1184	ColonTransverse	ENSG00000111321	0.850957	0.3842	chr12_6394334_G_C_b38
Astle_et_al_2016_Lymphocyte_counts	region1497	ColonTransverse	ENSG00000142494	0.313178	0.457	chr17_19527332_T_C_b38
Astle_et_al_2016_Lymphocyte_counts	region1503	ColonTransverse	ENSG00000276234	0.382596	0.5298	chr17_37406473_C_CA_b38
Astle_et_al_2016_Lymphocyte_counts	region597	ColonTransverse	ENSG00000245937	0.548912	0.7187	chr5_128097355_A_T_b38
Astle_et_al_2016_Lymphocyte_counts	region655	ColonTransverse	ENSG00000204444	0.385291	0.8205	chr6_31657087_A_G_b38
Astle_et_al_2016_Lymphocyte_counts	region715	ColonTransverse	ENSG00000198945	0.706898	0.8162	chr6_130053316_T_A_b38
Astle_et_al_2016_Lymphocyte_counts	region897	ColonTransverse	ENSG00000254352	0.322638	0.484	chr8_78724283_T_C_b38
Astle_et_al_2016_Lymphocyte_counts	region715	KidneyCortex	ENSG00000198945	0.676389	0.7927	chr6_130053316_T_A_b38
Astle_et_al_2016_Lymphocyte_counts	region1040	Lung	ENSG00000165633	0.429629	0.3613	chr10_49095491_C_T_b38
Astle_et_al_2016_Lymphocyte_counts	region1054	Lung	ENSG00000156502	0.659932	0.8184	chr10_69216160_C_T_b38
Astle_et_al_2016_Lymphocyte_counts	region1184	Lung	ENSG00000256433	0.952992	0.8075	chr12_6394334_G_C_b38
Astle_et_al_2016_Lymphocyte_counts	region131	Lung	ENSG00000169224	0.343041	0.3423	chr1_247514958_C_T_b38
Astle_et_al_2016_Lymphocyte_counts	region1330	Lung	ENSG00000151327	0.379058	0.6386	chr14_35045250_G_C_b38
Astle_et_al_2016_Lymphocyte_counts	region1350	Lung	ENSG00000258824	0.34498	0.4814	chr14_64456206_GC_G_b38
Astle_et_al_2016_Lymphocyte_counts	region1485	Lung	ENSG00000141480	0.54809	0.6319	chr17_4719256_A_G_b38
Astle_et_al_2016_Lymphocyte_counts	region1497	Lung	ENSG00000072134	0.430913	0.5364	chr17_19271561_T_C_b38
Astle_et_al_2016_Lymphocyte_counts	region1497	Lung	ENSG00000142494	0.442546	0.6373	chr17_19526066_G_C_b38
Astle_et_al_2016_Lymphocyte_counts	region1497	Lung	ENSG00000262319	0.305491	0.4328	chr17_19340319_C_T_b38
Astle_et_al_2016_Lymphocyte_counts	region1503	Lung	ENSG00000276234	0.385597	0.5704	chr17_37406473_C_CA_b38
Astle_et_al_2016_Lymphocyte_counts	region1589	Lung	ENSG00000072958	0.468909	0.587	chr19_16241949_C_T_b38
Astle_et_al_2016_Lymphocyte_counts	region1611	Lung	ENSG00000268849	0.752198	0.6787	chr19_51233128_G_C_b38
Astle_et_al_2016_Lymphocyte_counts	region191	Lung	ENSG00000115607	0.304226	0.4139	chr2_102418584_A_G_b38
Astle_et_al_2016_Lymphocyte_counts	region469	Lung	ENSG00000174749	0.689485	0.8412	chr4_112146326_A_T_b38
Astle_et_al_2016_Lymphocyte_counts	region597	Lung	ENSG00000245937	0.6467	0.7754	chr5_128053152_G_A_b38
Astle_et_al_2016_Lymphocyte_counts	region5	Lung	ENSG00000142599	0.746767	0.8254	chr1_8444361_C_A_b38
Astle_et_al_2016_Lymphocyte_counts	region5	Lung	ENSG00000232912	0.731718	0.7405	chr1_8424763_A_G_b38
Astle_et_al_2016_Lymphocyte_counts	region655	Lung	ENSG00000204438	0.561072	0.8522	chr6_31668965_A_G_b38
Astle_et_al_2016_Lymphocyte_counts	region655	Lung	ENSG00000204444	0.482074	0.8914	chr6_31657087_A_G_b38
Astle_et_al_2016_Lymphocyte_counts	region655	Lung	ENSG00000213719	0.30964	0.363	chr6_31740686_C_A_b38
Astle_et_al_2016_Lymphocyte_counts	region711	Lung	ENSG00000135549	0.546864	0.6356	chr6_122472375_A_G_b38
Astle_et_al_2016_Lymphocyte_counts	region715	Lung	ENSG00000198945	0.726816	0.8393	chr6_130053316_T_A_b38
Astle_et_al_2016_Lymphocyte_counts	region73	Lung	ENSG00000143437	0.31746	0.4553	chr1_150875171_C_T_b38
Astle_et_al_2016_Lymphocyte_counts	region897	Lung	ENSG00000254352	0.42088	0.513	chr8_78724283_T_C_b38
Astle_et_al_2016_Lymphocyte_counts	region1027	MuscleSkeletal	ENSG00000077420	0.387281	0.5381	chr10_26438463_G_GGGATAACAGAGGA_b38
Astle_et_al_2016_Lymphocyte_counts	region1184	MuscleSkeletal	ENSG00000111321	0.814366	0.3124	chr12_6394334_G_C_b38
Astle_et_al_2016_Lymphocyte_counts	region1184	MuscleSkeletal	ENSG00000256433	0.663233	0.7588	chr12_6394334_G_C_b38
Astle_et_al_2016_Lymphocyte_counts	region1331	MuscleSkeletal	ENSG00000240023	0.965455	0.8887	chr14_35401887_C_T_b38
Astle_et_al_2016_Lymphocyte_counts	region1350	MuscleSkeletal	ENSG00000259116	0.302267	0.5996	chr14_64533227_G_A_b38
Astle_et_al_2016_Lymphocyte_counts	region1497	MuscleSkeletal	ENSG00000072134	0.37193	0.5947	chr17_19254413_T_C_b38
Astle_et_al_2016_Lymphocyte_counts	region1503	MuscleSkeletal	ENSG00000276023	0.320198	0.506	chr17_37490169_T_C_b38
Astle_et_al_2016_Lymphocyte_counts	region1503	MuscleSkeletal	ENSG00000276234	0.347419	0.5879	chr17_37406473_C_CA_b38
Astle_et_al_2016_Lymphocyte_counts	region1655	MuscleSkeletal	ENSG00000229425	0.503958	0.6923	chr21_15433357_C_T_b38
Astle_et_al_2016_Lymphocyte_counts	region1687	MuscleSkeletal	ENSG00000128342	0.636554	0.6579	chr22_30196498_C_G_b38
Astle_et_al_2016_Lymphocyte_counts	region453	MuscleSkeletal	ENSG00000249242	0.377141	0.5915	chr4_82632742_G_T_b38
Astle_et_al_2016_Lymphocyte_counts	region469	MuscleSkeletal	ENSG00000174749	0.634884	0.8528	chr4_112146326_A_T_b38
Astle_et_al_2016_Lymphocyte_counts	region597	MuscleSkeletal	ENSG00000245937	0.595554	0.7864	chr5_128053152_G_A_b38
Astle_et_al_2016_Lymphocyte_counts	region598	MuscleSkeletal	ENSG00000125347	0.717687	0.8368	chr5_132466034_G_A_b38
Astle_et_al_2016_Lymphocyte_counts	region598	MuscleSkeletal	ENSG00000197536	0.66432	0.5151	chr5_132463834_G_T_b38
Astle_et_al_2016_Lymphocyte_counts	region5	MuscleSkeletal	ENSG00000232912	0.565693	0.7461	chr1_8424763_A_G_b38
Astle_et_al_2016_Lymphocyte_counts	region711	MuscleSkeletal	ENSG00000135549	0.323897	0.5593	chr6_122472375_A_G_b38
Astle_et_al_2016_Lymphocyte_counts	region715	MuscleSkeletal	ENSG00000198945	0.602328	0.6357	chr6_130053316_T_A_b38
Astle_et_al_2016_Lymphocyte_counts	region749	MuscleSkeletal	ENSG00000136240	0.937664	0.9789	chr7_6462736_T_C_b38
Astle_et_al_2016_Lymphocyte_counts	region897	MuscleSkeletal	ENSG00000254352	0.4151	0.5701	chr8_78724283_T_C_b38
Astle_et_al_2016_Lymphocyte_counts	region961	MuscleSkeletal	ENSG00000198467	0.479041	0.5828	chr9_35686379_G_A_b38
Astle_et_al_2016_Lymphocyte_counts	region979	MuscleSkeletal	ENSG00000213694	0.785067	0.8777	chr9_88890719_A_G_b38
Astle_et_al_2016_Lymphocyte_counts	region996	MuscleSkeletal	ENSG00000056558	0.475856	0.8105	chr9_120928959_T_G_b38
Astle_et_al_2016_Lymphocyte_counts	region115	Ovary	ENSG00000154380	0.44041	0.3758	chr1_225767970_G_A_b38
Astle_et_al_2016_Lymphocyte_counts	region1184	Ovary	ENSG00000256433	0.736428	0.8196	chr12_6394334_G_C_b38
[truncated: 1,977 more rows]

## Sheet: mQTL-GWAS coloc priors
Tissue	Trait	Prior	Value
[truncated: 2,349 more rows]

## Sheet: eQTL-GWAS coloc priors
Tissue	Trait	Prior	Value
[truncated: 2,349 more rows]
