# Supplementary material for: Genetic regulation of DNA methylation across tissues reveals thousands of molecular links to complex traits
Source: Research Square preprint supplement (doi:10.21203/rs.3.rs-492596/v1), 2021-05-11
Supplement: Supplementary file 2 [file a3b70e3791fa54362794f0c7.xlsx]

## Sheet: README
Supplementary Table 2 - eQTM discovery and replication
Sheet: eQTM Discovery
Column	Description
A	Tissue tested for eQTM
B	Number of CpGs tested for eQTM
C	Number of CpGs tested for eQTM that passed eQTM p-value < 0.05 threshold, for at least one of tested cis-genes.
D	Number of CpGs tested for eQTM that passed eQTM Bonferroni-adjusted p-value < 0.05 threshold, for at least one of tested cis-genes.
E	Number of CpGs tested for eQTM that passed eQTM false discovery rate < 0.05 threshold, for at least one of tested cis-genes.
F	Number corresponding to the union of CpGs tested for eQTM that passed eQTM false discovery rate < 0.05 threshold, for at least one of tested cis-genes, and CpGs that passed the across-tissues local false discovery rate threshold. Row 11 and 12 correspond to the across-tissues union and intersection of these CpGs.
G	Number of CpG-gene pairs corresponding to the union of the top CpG-gene pair, for CpGs that pass FDR < 0.05 threshold, and CpG-gene pairs that passed the across-tissues local false discovery rate threshold. Row 11 and 12 correspond to the across-tissues union and intersection of these CpGs.
Sheet: eQTM replication FUSION
Column	Description
A	GTEx tissue tested for eQTM replication in FUSION.
B	True positive rate statistic (pi1) (Leek et al. 2007). Row 10 corresponds to the across-tissues average value. Row 10 corresponds to the across-tissues average.
C	Number of CpG-gene pairs tested.
Sheet: eQTM Contributing factors
Column	Description
A	Annotation feature
B	Across-tissues meta-effect (log odds ratio)
C	Standard error of (B)
D	Random-effect meta-analysis statistic
E	P-value of (D)
F	Lower 95% confidence interval of (B)
G	Upper 95% confidence interval of (B)
H	I²: percentage of enrichment variation across tissues that is due to heterogeneity rather than chance
I	P-value of Cochran’s Q: Significance of across-tissue enrichment heterogeneity
J	Bonferroni-adjusted (E)
Sheet: eQTM Tissue-specificity
Column	Description
A	Number of tissues wehere a CpG passed the eQTM significance threshold.
B	Number corresponding to the union of CpGs tested for eQTM that passed eQTM false discovery rate < 0.05 threshold, for at least one of tested cis-genes, and CpGs that passed the across-tissues local false discovery rate threshold.
C	Number of CpG-gene pairs corresponding to the union of the top CpG-gene pair, for CpGs that pass FDR < 0.05 threshold, and CpG-gene pairs that passed the across-tissues local false discovery rate threshold.

## Sheet: eQTM Discovery
Tissue	# CpGs tested	# CpGs P < 0.05	# CpGs Bonf P < 0.05	# CpGs FDR < 0.05	# CpGs LFSR U FDR < 0.05	# CpGs:genes LFSR U FDR < 0.05
Breast	753165	581677	43066	42	3572	6318
Colon	753307	585914	46532	857	3702	6650
Lung	753136	589878	49530	3318	4324	8686
Muscle	752175	545683	44944	69	2597	4319
Ovary	753105	586007	52166	3086	4568	9251
Prostate	753244	591072	44914	99	3478	6203
Testis	754042	645468	47917	0	1542	2439
Blood	749696	529131	42257	44	2344	3916
				Union	5898	12652
				Intersection	581	2500

## Sheet: eQTM replication FUSION
Tissue	pi1	# CpGs:gene pairs tested
Breast	0.771448	2110
Colon	0.775301	3472
Lung	0.724816	5128
Muscle	0.840448	1705
Ovary	0.662228	5327
Prostate	0.824851	2117
Testis	0.624683	1024
Average	0.746254

## Sheet: eQTM Tissue-specificity
# Tissues	# CpGs LFSR U FDR < 0.05	# CpGs:genes LFSR U FDR < 0.05
1	2003	5629
2	166	333
3	181	344
4	267	552
5	492	1024
6	780	1587
7	1031	1859
8	978	1324

## Sheet: eQTM contributing factors
Feature	estimate	se	zval	pval	ci.lb	ci.ub	I2	QEp	padj
Promoter:CpGGeneTSSdistance	-0.0117508	0.000528089	-22.2516	1.08914e-109	-0.0127858	-0.0107158	66.5105	0.0017949	2.17828e-108
Promoter:Sign	0.615867	0.0530204	11.6157	3.43166e-31	0.511949	0.719785	20.2639	0.260418	6.86332e-30
Promoter:GeneExpLevel	-0.0216318	0.015127	-1.43001	0.152714	-0.0512802	0.00801662	46.1694	0.0304746	1
Promoter:CpGMethLevel	0.104873	0.00654483	16.0238	8.7105e-58	0.0920457	0.117701	0.57977	0.298826	1.7421e-56
ProximalEnhancer:CpGGeneTSSdistance	-0.0106108	0.000619367	-17.1316	8.61914e-66	-0.0118247	-0.00939683	81.7492	0.000134962	1.72383e-64
ProximalEnhancer:Sign	0.690128	0.0717821	9.6142	6.96463e-22	0.549438	0.830819	56.2996	0.0342264	1.39293e-20
ProximalEnhancer:GeneExpLevel	-0.01768	0.00991148	-1.78379	0.0744578	-0.0371061	0.00174614	0.0800809	0.45086	1
ProximalEnhancer:CpGMethLevel	0.031227	0.00642722	4.85856	1.18245e-06	0.0186299	0.0438241	0.718836	0.344888	2.36489e-05
Insulator:CpGGeneTSSdistance	-0.00465902	0.000596131	-7.81542	5.47793e-15	-0.00582741	-0.00349062	39.1963	0.235301	1.09559e-13
Insulator:Sign	-0.279142	0.179942	-1.55129	0.120832	-0.631821	0.0735374	0.00078679	0.271036	1
Insulator:GeneExpLevel	-0.169084	0.0498946	-3.38882	0.00070193	-0.266875	-0.0712924	0.0197163	0.46077	0.0140386
Insulator:CpGMethLevel	-0.140071	0.0290764	-4.81737	1.45464e-06	-0.19706	-0.0830829	0	0.855963	2.90928e-05
DistalEnhancer:CpGGeneTSSdistance	-0.00774634	0.000378463	-20.4679	4.1598e-93	-0.00848812	-0.00700457	71.4691	0.00190097	8.3196e-92
DistalEnhancer:Sign	-0.0755489	0.0460596	-1.64024	0.100955	-0.165824	0.0147263	0	0.782465	1
DistalEnhancer:GeneExpLevel	-0.0178254	0.0125989	-1.41483	0.157117	-0.0425189	0.00686805	14.8537	0.105805	1
DistalEnhancer:CpGMethLevel	-0.0744679	0.0101498	-7.33686	2.1867e-13	-0.0943612	-0.0545746	32.3544	0.1965	4.3734e-12
