# Supplementary material for: Genetic regulation of DNA methylation across tissues reveals thousands of molecular links to complex traits
Source: Research Square preprint supplement (doi:10.21203/rs.3.rs-492596/v1), 2021-05-11
Supplement: Supplementary file 4 [file bdb8267533f65c77b36ab0c6.xlsx]

## Sheet: README
Supplementary Table 1 - GTEx v8 cohort information
Sheet: Figure labeling
Column	Description
A	Samples' tissue of origin
B	Tissue label (abbreviation)
C	Color employed to depict a particular tissue
Sheet: Tissue sample size
Column	Description
A	Samples' tissue of origin
B	Sample size of DNAm-profiled samples
C	Sample size for cis-mQTL discovery analysis
D	Sample size for cis-eQTL discovery analysis
E	Sample size for cis-eQTM discovery analysis

## Sheet: Figure labeling
Tissue	Abbreviation Id	Color
Breast - Mammary Tissue	Breast	#33CCCC
Colon - Transverse	Colon	#CC9955
Kidney - Cortex	Kidney	#22FFDD
Lung	Lung	#99FF00
Muscle - Skeletal	Muscle	#AAAAFF
Ovary	Ovary	#FFAAFF
Prostate	Prostate	#DDDDDD
Testis	Testis	#AAAAAA
Whole Blood	Blood	#FF00BB

## Sheet: Tissue sample size
Tissue	DNAm profiling*	mQTL analysis*	eQTM analysis*	eQTL analysis*
Breast - Mammary Tissue	52	49	34	396
Colon - Transverse	224	189	75	368
Kidney - Cortex**	50	47	0	73
Lung	223	190	131	515
Muscle - Skeletal	47	42	32	706
Ovary	164	140	112	167
Prostate	123	105	44	221
Testis	50	47	25	322
Whole Blood	54	47	37	670
TOTAL	987	856	490	3438
* Sample size per analysis type
** Kidney was excluded from eQTM analysis due to insufficient sample size (N=5).
