# Supplementary material for: Genetic regulation of DNA methylation across tissues reveals thousands of molecular links to complex traits
Source: Research Square preprint supplement (doi:10.21203/rs.3.rs-492596/v1), 2021-05-11
Supplement: Supplementary file 5 [file cfa76da639f142131e60083a.xlsx]

## Sheet: README
Supplementary Table 4 - Colocalization of ovarian cancer GWAS with HOXD-locus QTLs
Sheet: HOXD-locus colocalizations
Column	Description
A	QTL trait id
B	Number of variants tested for colocalization
C	PP0: Probability of no association with either trait
D	PP1:Probability of one causal variant associated with GWAS trait, but not with QTL trait.
E	PP2:Probability of one causal variant associated with QTL trait, but not with GWAS trait.
F	PP3:Probability of two independent causal variants associated with each trait.
G	PP4:Probability of one causal variant associated with both traits.

## Sheet: HOXD-locus colocalizations
eGene/mCpG	# variants	PP.H0.abf	PP.H1.abf	PP.H2.abf	PP.H3.abf	PP.H4.abf
HOXD3	4161	9.88179e-14	2.07821e-05	5.72146e-11	0.0110437	0.988936
HOXD4	4172	1.35901e-11	0.00285811	2.02266e-10	0.0415825	0.955559
HOXD1	4218	2.83047e-10	0.059527	1.89273e-10	0.0389039	0.901569
RP11-387A1.5	4189	6.08493e-10	0.127971	7.06976e-10	0.147958	0.724071
MTX2	4320	8.64273e-10	0.181763	5.10355e-10	0.10662	0.711617
HAGLR	4218	8.8092e-10	0.185264	5.49429e-10	0.114849	0.699887
HOXD8	4153	1.07425e-09	0.225923	4.96052e-10	0.103653	0.670425
HAGLROS	5229	2.76877e-11	0.00582293	4.27951e-09	0.899918	0.0942595
cg10477905	2574	2.73633e-73	5.7547e-65	4.24451e-11	0.00793445	0.992066
cg22934308	2569	2.25921e-49	4.75128e-41	4.4817e-11	0.00843378	0.991566
cg14399060	2556	6.85075e-21	1.44076e-12	4.60555e-11	0.0086945	0.991306
cg26590744	2553	4.88104e-27	1.02652e-18	4.72278e-11	0.00894129	0.991059
cg09981233	2555	3.53616e-35	7.4368e-27	4.72292e-11	0.00894159	0.991058
cg01414185	2553	1.11062e-27	2.33572e-19	4.74036e-11	0.00897831	0.991022
cg00767581	2556	3.62834e-25	7.63067e-17	4.74786e-11	0.00899409	0.991006
cg23139698	2574	1.89291e-20	3.98092e-12	4.75247e-11	0.0090038	0.990996
cg23322546	2572	6.95733e-43	1.46318e-34	4.80391e-11	0.00911209	0.990888
cg02857760	2564	5.92098e-18	1.24523e-09	4.87091e-11	0.00925314	0.990747
cg07011913	2556	3.45126e-20	7.25825e-12	4.8975e-11	0.00930912	0.990691
cg25304107	2552	7.40995e-31	1.55837e-22	4.91458e-11	0.00934507	0.990655
cg13768137	2573	1.10599e-16	2.32598e-08	4.91587e-11	0.00934779	0.990652
cg25951210	2556	1.41426e-31	2.9743e-23	4.93062e-11	0.00937884	0.990621
cg19509393	2556	2.15311e-24	4.52815e-16	5.02366e-11	0.0095747	0.990425
cg06011461	2572	2.18033e-17	4.58539e-09	5.04177e-11	0.00961283	0.990387
cg08182501	2568	5.36845e-17	1.12903e-08	5.04671e-11	0.00962324	0.990377
cg11418595	2566	5.13003e-39	1.07888e-30	5.08094e-11	0.00969528	0.990305
cg10803577	2556	2.01077e-30	4.2288e-22	5.08693e-11	0.0097079	0.990292
cg04248916	2567	1.24356e-27	2.61529e-19	5.09584e-11	0.00972664	0.990273
cg18944451	2564	6.38259e-19	1.34231e-10	5.11224e-11	0.00976119	0.990239
cg07797397	2566	7.55815e-28	1.58953e-19	5.13509e-11	0.00980928	0.990191
cg01152019	2556	8.49382e-22	1.78631e-13	5.1406e-11	0.00982088	0.990179
cg24541426	2563	2.86099e-23	6.01687e-15	5.15196e-11	0.00984481	0.990155
cg13053653	2565	5.41823e-18	1.13949e-09	5.1616e-11	0.00986509	0.990135
cg10159630	2566	5.6519e-16	1.18864e-07	5.16862e-11	0.00987987	0.99012
cg09701582	2552	2.27715e-16	4.789e-08	5.17881e-11	0.00990132	0.990099
cg12539415	2556	1.1787e-27	2.47889e-19	5.17902e-11	0.00990177	0.990098
cg21932416	2579	6.89296e-15	1.44964e-06	5.19499e-11	0.00993539	0.990063
cg18516557	2568	2.14053e-18	4.50169e-10	5.2092e-11	0.00996531	0.990035
cg25942990	2557	1.18768e-21	2.49778e-13	5.23894e-11	0.0100279	0.989972
cg10086659	2572	9.5581e-18	2.01014e-09	5.26946e-11	0.0100922	0.989908
cg14298457	2564	9.05086e-15	1.90346e-06	5.34191e-11	0.0102447	0.989753
cg19478682	2556	1.81284e-18	3.81253e-10	5.3485e-11	0.0102586	0.989741
cg16218721	2552	5.05232e-19	1.06254e-10	5.38002e-11	0.0103249	0.989675
cg06896987	2567	7.38298e-15	1.55269e-06	5.38665e-11	0.0103389	0.98966
cg21011616	2556	8.7504e-23	1.84027e-14	5.38906e-11	0.0103439	0.989656
cg00278547	2566	7.134e-15	1.50033e-06	5.43332e-11	0.0104371	0.989561
cg09583532	2556	3.57903e-19	7.52697e-11	5.44033e-11	0.0104519	0.989548
cg04201253	2563	3.55347e-17	7.4732e-09	5.44372e-11	0.010459	0.989541
cg12721835	2572	1.20391e-14	2.53192e-06	5.47012e-11	0.0105146	0.989483
cg14454907	2562	7.34864e-18	1.54547e-09	5.4716e-11	0.0105177	0.989482
cg00014998	2557	1.02785e-17	2.16165e-09	5.4792e-11	0.0105337	0.989466
cg11248896	2567	2.94812e-16	6.20012e-08	5.60387e-11	0.0107961	0.989204
cg25938806	2564	4.79599e-16	1.00863e-07	5.60725e-11	0.0108033	0.989197
cg05525812	2563	5.58215e-20	1.17397e-11	5.61118e-11	0.0108115	0.989188
cg17818471	2564	1.83292e-19	3.85476e-11	5.61579e-11	0.0108213	0.989179
cg27160395	2557	1.08025e-13	2.27184e-05	5.60551e-11	0.0107996	0.989178
cg26821745	2565	3.95655e-18	8.32092e-10	5.62527e-11	0.0108412	0.989159
cg19519747	2556	9.85133e-17	2.07181e-08	5.6401e-11	0.0108724	0.989128
cg22344631	2564	2.60195e-15	5.47208e-07	5.64613e-11	0.0108851	0.989114
cg26654148	2554	1.03945e-24	2.18604e-16	5.64893e-11	0.010891	0.989109
cg01473155	2566	4.09126e-13	8.60422e-05	5.62753e-11	0.010846	0.989068
cg14900124	2553	2.97966e-15	6.26645e-07	5.68166e-11	0.0109599	0.989039
cg04843067	2556	3.86807e-17	8.13484e-09	5.74429e-11	0.0110918	0.988908
cg01043845	2564	6.40078e-15	1.34613e-06	5.76103e-11	0.011127	0.988872
cg06145336	2565	2.90273e-13	6.10465e-05	5.74166e-11	0.0110863	0.988853
cg03401519	2572	2.00942e-21	4.22595e-13	5.80025e-11	0.0112096	0.98879
cg25916282	2564	3.38557e-14	7.1201e-06	5.81966e-11	0.0112504	0.988742
cg20739994	2556	4.05155e-13	8.52072e-05	5.82252e-11	0.0112565	0.988658
cg25708328	2561	3.73051e-16	7.84554e-08	5.87868e-11	0.0113747	0.988625
cg01293179	2583	2.34276e-13	4.927e-05	5.9177e-11	0.0114569	0.988494
cg11375458	2568	2.73074e-14	5.74294e-06	5.95439e-11	0.0115341	0.98846
cg01871127	2564	4.19195e-13	8.81598e-05	5.99063e-11	0.0116104	0.988301
cg03321133	2586	1.13287e-12	0.000238252	5.92843e-11	0.0114796	0.988282
cg12127282	2557	5.84425e-14	1.22909e-05	6.09329e-11	0.0118265	0.988161
cg18750960	2556	4.0637e-20	8.54627e-12	6.10123e-11	0.0118432	0.988157
cg00223681	2565	1.32568e-14	2.78801e-06	6.13378e-11	0.0119117	0.988086
cg14940165	2562	3.5082e-14	7.37801e-06	6.13599e-11	0.0119164	0.988076
cg19373813	2585	1.35672e-12	0.000285329	6.0113e-11	0.0116541	0.988061
cg26091021	2562	1.71743e-17	3.61189e-09	6.18523e-11	0.01202	0.98798
cg08717880	2557	3.25825e-15	6.85235e-07	6.26495e-11	0.0121878	0.987811
cg15990972	2565	3.17534e-14	6.67798e-06	6.29065e-11	0.012242	0.987751
cg17104824	2557	2.26304e-15	4.75933e-07	6.2944e-11	0.0122498	0.98775
cg24000528	2561	1.10289e-14	2.31945e-06	6.42336e-11	0.0125213	0.987476
cg07783843	2582	3.22709e-14	6.7868e-06	6.43606e-11	0.0125481	0.987445
cg03553278	2571	2.04698e-12	0.000430494	6.36704e-11	0.0124032	0.987166
cg06316886	2564	5.95515e-13	0.000125241	6.61838e-11	0.012932	0.986943
cg04194947	2564	4.85255e-13	0.000102053	6.85376e-11	0.0134275	0.98647
cg23460578	2558	4.61312e-12	0.000970173	6.56186e-11	0.0128139	0.986216
cg21902187	2565	1.86245e-15	3.91688e-07	7.1713e-11	0.0140959	0.985904
cg02408153	2563	6.04291e-12	0.00127087	6.64785e-11	0.0129952	0.985734
cg25137403	2561	4.85103e-12	0.00102021	6.76904e-11	0.0132501	0.98573
cg12938020	2564	2.07658e-12	0.00043672	7.04885e-11	0.0138385	0.985725
cg10503083	2568	2.99415e-12	0.000629692	6.98426e-11	0.0137027	0.985668
cg07930539	2564	3.42586e-12	0.000720484	7.14663e-11	0.0140447	0.985235
cg00035316	2585	1.26707e-11	0.00266474	6.26421e-11	0.012189	0.985146
cg13295262	2601	6.0449e-12	0.00127129	7.36331e-11	0.0145014	0.984227
cg23676302	2564	2.99819e-15	6.30542e-07	8.10907e-11	0.01607	0.983929
cg13092806	2571	1.05099e-13	2.21031e-05	8.47584e-11	0.0168422	0.983136
cg18448949	2586	2.31494e-11	0.0048685	6.51014e-11	0.0127089	0.982423
cg11597131	2585	2.50414e-11	0.0052664	6.6527e-11	0.0130094	0.981724
cg02773086	2564	2.25376e-11	0.00473982	7.67043e-11	0.0151514	0.980109
cg23986620	2564	2.84374e-11	0.00598059	7.79007e-11	0.0154045	0.978615
cg08079908	2582	3.36658e-11	0.00708016	8.01532e-11	0.0158798	0.97704
cg23901857	2585	4.7255e-11	0.00993808	7.58388e-11	0.0149744	0.975088
cg05342515	2565	6.03544e-11	0.012693	8.14908e-11	0.016167	0.97114
cg10304824	2563	1.64236e-11	0.00345401	1.33233e-10	0.0270503	0.969496
cg15812753	2563	8.02675e-14	1.68809e-05	1.55179e-10	0.031667	0.968316
cg15161959	2560	8.88497e-11	0.0186858	9.90806e-11	0.0198759	0.961438
cg09173768	2585	1.06302e-10	0.0223561	1.04444e-10	0.0210087	0.956635
cg12858336	2572	5.92877e-11	0.0124686	1.52756e-10	0.0311693	0.956362
cg09601175	2563	1.15287e-10	0.0242456	1.06162e-10	0.0213723	0.954382
cg01014615	2564	1.23157e-10	0.0259008	1.06085e-10	0.0213576	0.952742
cg01128482	2564	1.50685e-10	0.0316901	1.11799e-10	0.0225665	0.945743
cg04316624	2569	8.95612e-11	0.0188354	2.02435e-10	0.041634	0.939531
cg09387749	2563	1.70013e-10	0.0357549	1.22622e-10	0.0248489	0.939396
cg14376031	2518	1.57147e-10	0.0330491	1.52936e-10	0.0312279	0.935723
cg10753836	2585	2.25628e-10	0.0474511	1.22554e-10	0.0248463	0.927703
cg05021643	2563	1.69476e-11	0.0035642	3.8586e-10	0.080233	0.916203
cg26791400	2630	9.62929e-10	0.202508	5.17338e-10	0.108109	0.689382
cg03152288	2572	2.06566e-11	0.00434424	1.59266e-09	0.334287	0.661369
cg02164574	2591	1.41509e-09	0.297603	1.31772e-09	0.2767	0.425696
cg14142007	2590	2.41622e-26	5.08149e-18	4.75494e-09	1	1.33329e-08
