# Supplementary material for: Genetic regulation of DNA methylation across tissues reveals thousands of molecular links to complex traits
Source: Research Square preprint supplement (doi:10.21203/rs.3.rs-492596/v1), 2021-05-11
Supplement: Supplementary file 6 [file fe6f1ccefe1d3f87704ae505.xlsx]

## Sheet: README
Supplementary Table 6 - Trait-linked mCpG gene candidates
Sheet: Trait-associated gene candidates
Column	Description
A	GWAS hit locus, identified by GWAS trait | Genomic LD block (see 'Determination of GWAS significant loci' in Methods)
B	For a particular GWAS hit locus in (A), the total number of mQTL loci colocalized
C	For a particular GWAS hit locus in (A), the total number of candidate genes predicted (see 'X' in Methods)
D	For each candidate gene linked to a GWAS locus, the number of mQTL loci supporting the gene (see 'X' in Methods)

## Sheet: Trait-associated gene candidate
Trait|Genomic LD block	# mCpGs linked to GWAS hit	# candidate genes	Gene|Gene support in # mCpG-RegulatoryRegion links
UKB_20002_1111_self_reported_asthma|region1668	12	4	RUNX1|12;LINC01426|9;RUNX1-IT1|2;LINC00160|2;
UKB_6152_8_diagnosed_by_doctor_Asthma|region1668	12	4	RUNX1|12;LINC01426|9;RUNX1-IT1|2;LINC00160|2;
UKB_50_Standing_height|region746	10	10	GNA12|10;AMZ1|10;TTYH3|7;SDK1|7;MAD1L1|7;LOC100129603|7;LFNG|7;IQCE|7;CHST12|7;BRAT1|7;
Astle_et_al_2016_High_light_scatter_reticulocyte_count|region1375	9	31	CKB|7;TRMT61A|5;ZNF839|2;ZFYVE21|2;XRCC3|2;WDR20|2;TRAF3|2;TNFAIP2|2;TECPR2|2;SIVA1|2;RCOR1|2;PPP1R13B|2;NUDT14|2;MARK3|2;LINC00677|2;LINC00637|2;KLC1|2;KIF26A|2;INF2|2;HSP90AA1|2;EIF5|2;CINP|2;CDCA4|2;CDC42BPB|2;C14orf79|2;C14orf2|2;C14orf180|2;BTBD6|2;BAG5|2;APOPT1|2;ANKRD9|2;
Astle_et_al_2016_Eosinophil_counts|region879	8	3	SPIDR|8;LOC100287846|7;CEBPD|7;
Astle_et_al_2016_Granulocyte_count|region1059	8	31	ZMIZ1-AS1|8;ZMIZ1|8;ZCCHC24|8;TMEM254-AS1|8;TMEM254|8;RPS24|8;PPIF|8;POLR3A|8;LOC102723703|8;FAM213A|8;DLG5|8;BMS1P21|8;ANXA11|8;DLG5-AS1|7;NUTM2B-AS1|6;LOC642361|6;SH2D4B|4;SFTPD|4;LOC101929574|4;DYDC1|4;SFTPA1|2;MBL1P|2;LINC00856|2;DYDC2|2;SFTPA2|1;PLAC9|1;MAT1A|1;LINC00857|1;LINC00595|1;KCNMA1-AS3|1;KCNMA1|1;
Astle_et_al_2016_Monocyte_count|region879	8	3	SPIDR|8;LOC100287846|7;CEBPD|7;
Astle_et_al_2016_Myeloid_white_cell_count|region1059	8	31	ZMIZ1-AS1|8;ZMIZ1|8;ZCCHC24|8;TMEM254-AS1|8;TMEM254|8;RPS24|8;PPIF|8;POLR3A|8;LOC102723703|8;FAM213A|8;DLG5|8;BMS1P21|8;ANXA11|8;DLG5-AS1|7;NUTM2B-AS1|6;LOC642361|6;SH2D4B|4;SFTPD|4;LOC101929574|4;DYDC1|4;SFTPA1|2;MBL1P|2;LINC00856|2;DYDC2|2;SFTPA2|1;PLAC9|1;MAT1A|1;LINC00857|1;LINC00595|1;KCNMA1-AS3|1;KCNMA1|1;
Astle_et_al_2016_Neutrophil_count|region1059	8	31	ZMIZ1-AS1|8;ZMIZ1|8;ZCCHC24|8;TMEM254-AS1|8;TMEM254|8;RPS24|8;PPIF|8;POLR3A|8;LOC102723703|8;FAM213A|8;DLG5|8;BMS1P21|8;ANXA11|8;DLG5-AS1|7;NUTM2B-AS1|6;LOC642361|6;SH2D4B|4;SFTPD|4;LOC101929574|4;DYDC1|4;SFTPA1|2;MBL1P|2;LINC00856|2;DYDC2|2;SFTPA2|1;PLAC9|1;MAT1A|1;LINC00857|1;LINC00595|1;KCNMA1-AS3|1;KCNMA1|1;
Astle_et_al_2016_Reticulocyte_count|region1375	8	31	CKB|7;TRMT61A|4;ZNF839|2;ZFYVE21|2;XRCC3|2;WDR20|2;TRAF3|2;TNFAIP2|2;TECPR2|2;SIVA1|2;RCOR1|2;PPP1R13B|2;NUDT14|2;MARK3|2;LINC00677|2;LINC00637|2;KLC1|2;KIF26A|2;INF2|2;HSP90AA1|2;EIF5|2;CINP|2;CDCA4|2;CDC42BPB|2;C14orf79|2;C14orf2|2;C14orf180|2;BTBD6|2;BAG5|2;APOPT1|2;ANKRD9|2;
Astle_et_al_2016_Sum_basophil_neutrophil_counts|region1059	8	31	ZMIZ1-AS1|8;ZMIZ1|8;ZCCHC24|8;TMEM254-AS1|8;TMEM254|8;RPS24|8;PPIF|8;POLR3A|8;LOC102723703|8;FAM213A|8;DLG5|8;BMS1P21|8;ANXA11|8;DLG5-AS1|7;NUTM2B-AS1|6;LOC642361|6;SH2D4B|4;SFTPD|4;LOC101929574|4;DYDC1|4;SFTPA1|2;MBL1P|2;LINC00856|2;DYDC2|2;SFTPA2|1;PLAC9|1;MAT1A|1;LINC00857|1;LINC00595|1;KCNMA1-AS3|1;KCNMA1|1;
Astle_et_al_2016_Sum_eosinophil_basophil_counts|region879	8	3	SPIDR|8;LOC100287846|7;CEBPD|7;
Astle_et_al_2016_Sum_neutrophil_eosinophil_counts|region1059	8	31	ZMIZ1-AS1|8;ZMIZ1|8;ZCCHC24|8;TMEM254-AS1|8;TMEM254|8;RPS24|8;PPIF|8;POLR3A|8;LOC102723703|8;FAM213A|8;DLG5|8;BMS1P21|8;ANXA11|8;DLG5-AS1|7;NUTM2B-AS1|6;LOC642361|6;SH2D4B|4;SFTPD|4;LOC101929574|4;DYDC1|4;SFTPA1|2;MBL1P|2;LINC00856|2;DYDC2|2;SFTPA2|1;PLAC9|1;MAT1A|1;LINC00857|1;LINC00595|1;KCNMA1-AS3|1;KCNMA1|1;
UKB_20002_1452_self_reported_eczema_or_dermatitis|region1129	8	4	OVOL1|8;OVOL1-AS1|7;AP5B1|7;SNX32|4;
UKB_50_Standing_height|region593	8	6	LOX|8;SRFBP1|6;ZNF474|2;SNX2|1;SNCAIP|1;PRR16|1;
Astle_et_al_2016_Granulocyte_count|region1451	7	10	SMG1P5|7;ITGAL|6;ZNF48|1;TBC1D10B|1;SEPT1|1;SEPHS2|1;NPIPB12|1;MYLPF|1;GDPD3|1;CD2BP2|1;
Astle_et_al_2016_Lymphocyte_counts|region1178	7	17	NINJ2|7;LOC100049716|7;WNK1|1;SLC6A13|1;SLC6A12|1;RAD52|1;LOC105369595|1;LOC102723544|1;LOC101929384|1;LINC00942|1;LINC00940|1;KDM5A|1;FBXL14|1;ERC1|1;CCDC77|1;B4GALNT3|1;ADIPOR2|1;
Astle_et_al_2016_Myeloid_white_cell_count|region1451	7	10	SMG1P5|7;ITGAL|6;ZNF48|1;TBC1D10B|1;SEPT1|1;SEPHS2|1;NPIPB12|1;MYLPF|1;GDPD3|1;CD2BP2|1;
Astle_et_al_2016_Platelet_count|region1178	7	17	NINJ2|7;LOC100049716|7;WNK1|1;SLC6A13|1;SLC6A12|1;RAD52|1;LOC105369595|1;LOC102723544|1;LOC101929384|1;LINC00942|1;LINC00940|1;KDM5A|1;FBXL14|1;ERC1|1;CCDC77|1;B4GALNT3|1;ADIPOR2|1;
Astle_et_al_2016_Red_blood_cell_count|region253	7	28	ZDBF2|7;PLEKHM3|7;METTL21A|7;MDH1B|7;LOC101927865|7;KLF7|7;GPR1|7;FZD5|7;FASTKD2|7;CRYGD|7;CREB1|7;ADAM23|7;C2orf80|6;CPO|3;PTH2R|1;PIKFYVE|1;NRP2|1;NDUFS1|1;LOC101927960|1;LINC01857|1;INO80D|1;IDH1-AS1|1;IDH1|1;EEF1B2|1;DYTN|1;CRYGB|1;CRYGA|1;CCNYL1|1;
Astle_et_al_2016_Sum_basophil_neutrophil_counts|region1451	7	10	SMG1P5|7;ITGAL|6;ZNF48|1;TBC1D10B|1;SEPT1|1;SEPHS2|1;NPIPB12|1;MYLPF|1;GDPD3|1;CD2BP2|1;
Astle_et_al_2016_Sum_neutrophil_eosinophil_counts|region1451	7	10	SMG1P5|7;ITGAL|6;ZNF48|1;TBC1D10B|1;SEPT1|1;SEPHS2|1;NPIPB12|1;MYLPF|1;GDPD3|1;CD2BP2|1;
UKB_20002_1065_self_reported_hypertension|region1095	7	15	TNNI2|7;MRPL23|7;LSP1|7;TNNT3|1;SYT8|1;PHLDA2|1;MRPL23-AS1|1;MOB2|1;LINC01219|1;KRTAP5-AS1|1;DUSP8|1;CTSD|1;BRSK2|1;ASCL2|1;AP2A2|1;
Astle_et_al_2016_Granulocyte_count|region122	6	15	LYST|6;NID1|2;TOMM20|1;TBCE|1;RNU6-968P|1;RBM34|1;MTR|1;LGALS8-AS1|1;LGALS8|1;HEATR1|1;GPR137B|1;GNG4|1;ERO1B|1;EDARADD|1;B3GALNT2|1;
Astle_et_al_2016_Lymphocyte_counts|region1451	6	3	SMG1P5|6;ITGAL|6;SEPHS2|1;
Astle_et_al_2016_Lymphocyte_counts|region1585	6	8	ICAM5|6;RAVER1|5;ICAM1|5;ICAM4|2;ZGLP1|1;TYK2|1;ICAM3|1;FDX1L|1;
Astle_et_al_2016_Lymphocyte_counts|region198	6	20	PAX8-AS1|6;PAX8|6;PSD4|2;IL1B|2;AC079922.3|2;ZC3H8|1;TTL|1;SLC35F5|1;RGPD8|1;LOC101060091|1;LINC01191|1;IL36RN|1;IL36B|1;IL1RN|1;FOXD4L1|1;FBLN7|1;DPP10-AS1|1;CKAP2L|1;CHCHD5|1;ACTR3|1;
Astle_et_al_2016_Monocyte_count|region1451	6	3	SMG1P5|6;ITGAL|6;SEPHS2|1;
Astle_et_al_2016_Myeloid_white_cell_count|region122	6	15	LYST|6;NID1|2;TOMM20|1;TBCE|1;RNU6-968P|1;RBM34|1;MTR|1;LGALS8-AS1|1;LGALS8|1;HEATR1|1;GPR137B|1;GNG4|1;ERO1B|1;EDARADD|1;B3GALNT2|1;
Astle_et_al_2016_Neutrophil_count|region1477	6	2	IRF8|6;COX4I1|5;
Astle_et_al_2016_Platelet_count|region980	6	3	SYK|6;GADD45G|1;AUH|1;
Astle_et_al_2016_Red_blood_cell_count|region1039	6	1	TMEM72|6;
Astle_et_al_2016_Red_blood_cell_count|region1115	6	22	LMO2|6;FBXO3-AS1|5;FBXO3|5;CD59|3;C11orf91|3;ABTB2|3;WT1-AS|2;WT1|2;TCP11L1|2;QSER1|2;PRRG4|2;PDHX|2;NAT10|2;ELF5|2;EIF3M|2;EHF|2;DEPDC7|2;CSTF3-AS1|2;CSTF3|2;CAT|2;CAPRIN1|2;APIP|2;
Astle_et_al_2016_Sum_basophil_neutrophil_counts|region1477	6	2	IRF8|6;COX4I1|5;
Astle_et_al_2016_Sum_neutrophil_eosinophil_counts|region122	6	15	LYST|6;NID1|2;TOMM20|1;TBCE|1;RNU6-968P|1;RBM34|1;MTR|1;LGALS8-AS1|1;LGALS8|1;HEATR1|1;GPR137B|1;GNG4|1;ERO1B|1;EDARADD|1;B3GALNT2|1;
Astle_et_al_2016_White_blood_cell_count|region1451	6	3	SMG1P5|6;ITGAL|6;SEPHS2|1;
Astle_et_al_2016_White_blood_cell_count|region1585	6	9	ICAM5|5;RAVER1|2;ICAM4|2;ICAM1|2;ZGLP1|1;TYK2|1;MRPL4|1;ICAM3|1;FDX1L|1;
MAGNETIC_LDL.C|region144	6	1	APOB|6;
UKB_20002_1473_self_reported_high_cholesterol|region144	6	1	APOB|6;
UKB_20022_Birth_weight|region745	6	25	AMZ1|6;TTYH3|3;IQCE|3;GNA12|3;CHST12|3;BRAT1|3;ZFAND2A|2;TMEM184A|2;SNX8|2;PSMG3-AS1|2;PSMG3|2;NUDT1|2;MRM2|2;MICALL2|2;MAD1L1|2;LOC101927021|2;INTS1|2;FOXK1|2;ELFN1-AS1|2;EIF3B|2;DNAAF5|2;CARD11|2;C7orf50|2;LOC101927181|1;LFNG|1;
UKB_21001_Body_mass_index_BMI|region1231	6	5	POC1B|6;GALNT4|6;DUSP6|6;POC1B-GALNT4|2;C12orf29|2;
UKB_21001_Body_mass_index_BMI|region1608	6	10	SNRPD2|6;QPCTL|6;GIPR|6;FBXO46|6;EML2-AS1|6;EML2|6;VASP|5;RTN2|5;OPA3|5;GPR4|3;
UKB_23099_Body_fat_percentage|region1608	6	10	SNRPD2|6;QPCTL|6;GIPR|6;FBXO46|6;EML2-AS1|6;EML2|6;VASP|5;RTN2|5;OPA3|5;GPR4|3;
UKB_50_Standing_height|region1247	6	18	TBX3|6;TBX5-AS1|2;TBX5|2;SDSL|2;RBM19|2;OAS2|2;TPCN1|1;SLC8B1|1;SDS|1;RITA1|1;PLBD2|1;OAS1|1;MED13L|1;MAP1LC3B2|1;LINC00173|1;IQCD|1;DDX54|1;CFAP73|1;
UKB_50_Standing_height|region1374	6	1	ANKRD9|6;
Astle_et_al_2016_Granulocyte_count|region1477	5	2	IRF8|5;COX4I1|4;
Astle_et_al_2016_Granulocyte_count|region5	5	4	LOC102724552|3;ENO1|3;RERE|2;ENO1-AS1|2;
Astle_et_al_2016_High_light_scatter_reticulocyte_count|region610	5	13	SAP30L-AS1|5;SAP30L|5;LARP1|5;GEMIN5|5;KIF4B|4;SGCD|3;MRPL22|3;MFAP3|3;HAND1|3;GALNT10|3;FAXDC2|3;FAM114A2|3;CNOT8|3;
Astle_et_al_2016_Lymphocyte_counts|region1499	5	6	TP53I13|5;GIT1|5;CORO6|5;ANKRD13B|5;SSH2|3;ABHD15|3;
Astle_et_al_2016_Lymphocyte_counts|region1587	5	8	ZSWIM4|5;LOC284454|5;RFX1|4;MRI1|4;DCAF15|4;CCDC130|4;C19orf53|2;IL27RA|1;
Astle_et_al_2016_Lymphocyte_counts|region1693	5	3	CBX7|5;APOBEC3G|5;PDGFB|1;
Astle_et_al_2016_Lymphocyte_counts|region607	5	1	ANXA6|5;
Astle_et_al_2016_Monocyte_count|region122	5	4	LYST|5;RNU6-968P|1;NID1|1;GNG4|1;
Astle_et_al_2016_Monocyte_count|region1477	5	10	MTHFSD|5;IRF8|5;GINS2|5;FLJ30679|5;EMC8|5;COX4I1|5;LINC01082|3;FOXL1|3;FAM92B|3;C16orf74|3;
Astle_et_al_2016_Myeloid_white_cell_count|region5	5	4	LOC102724552|3;ENO1|3;RERE|2;ENO1-AS1|2;
Astle_et_al_2016_Neutrophil_count|region122	5	15	LYST|5;NID1|2;TOMM20|1;TBCE|1;RNU6-968P|1;RBM34|1;MTR|1;LGALS8-AS1|1;LGALS8|1;HEATR1|1;GPR137B|1;GNG4|1;ERO1B|1;EDARADD|1;B3GALNT2|1;
Astle_et_al_2016_Neutrophil_count|region5	5	4	LOC102724552|3;ENO1|3;RERE|2;ENO1-AS1|2;
Astle_et_al_2016_Platelet_count|region1681	5	8	ARVCF|5;TANGO2|3;TRMT2A|2;RANBP1|2;DGCR8|2;ZDHHC8|1;TXNRD2|1;COMT|1;
Astle_et_al_2016_Platelet_count|region351	5	3	SEMA5B|4;PDIA5|4;SEC22A|1;
Astle_et_al_2016_Red_blood_cell_count|region702	5	5	CCDC162P|4;CD164|2;SMPD2|1;RP11-425D10.10|1;LOC100996634|1;
Astle_et_al_2016_Reticulocyte_count|region610	5	13	SAP30L-AS1|5;SAP30L|5;LARP1|5;GEMIN5|5;KIF4B|4;SGCD|3;MRPL22|3;MFAP3|3;HAND1|3;GALNT10|3;FAXDC2|3;FAM114A2|3;CNOT8|3;
Astle_et_al_2016_Sum_basophil_neutrophil_counts|region122	5	15	LYST|5;NID1|2;TOMM20|1;TBCE|1;RNU6-968P|1;RBM34|1;MTR|1;LGALS8-AS1|1;LGALS8|1;HEATR1|1;GPR137B|1;GNG4|1;ERO1B|1;EDARADD|1;B3GALNT2|1;
Astle_et_al_2016_Sum_basophil_neutrophil_counts|region5	5	4	LOC102724552|3;ENO1|3;RERE|2;ENO1-AS1|2;
Astle_et_al_2016_Sum_neutrophil_eosinophil_counts|region1477	5	2	IRF8|5;COX4I1|4;
Astle_et_al_2016_Sum_neutrophil_eosinophil_counts|region5	5	4	LOC102724552|3;ENO1|3;RERE|2;ENO1-AS1|2;
Astle_et_al_2016_White_blood_cell_count|region122	5	15	LYST|5;NID1|2;TOMM20|1;TBCE|1;RNU6-968P|1;RBM34|1;MTR|1;LGALS8-AS1|1;LGALS8|1;HEATR1|1;GPR137B|1;GNG4|1;ERO1B|1;EDARADD|1;B3GALNT2|1;
Astle_et_al_2016_White_blood_cell_count|region1587	5	8	ZSWIM4|5;LOC284454|5;RFX1|4;MRI1|4;DCAF15|4;CCDC130|4;C19orf53|2;IL27RA|1;
Astle_et_al_2016_White_blood_cell_count|region1693	5	3	CBX7|5;APOBEC3G|5;PDGFB|1;
EAGLE_Eczema|region1129	5	4	OVOL1|5;OVOL1-AS1|4;AP5B1|4;SNX32|1;
EGG_BW3_EUR|region1419	5	4	FES|5;UNC45A|1;IQGAP1|1;FURIN|1;
GIANT_HEIGHT|region142	5	4	OSR1|5;TTC32|4;RDH14|4;LINC00954|4;
IBD.EUR.Crohns_Disease|region5	5	5	VAMP3|5;PER3|5;UTS2|2;PARK7|2;ERRFI1|2;
UKB_20002_1065_self_reported_hypertension|region1115	5	10	WT1-AS|5;WT1|5;RCN1|1;QSER1|1;IMMP1L|1;ELP4|1;EIF3M|1;DNAJC24|1;DEPDC7|1;DCDC1|1;
UKB_21001_Body_mass_index_BMI|region1466	5	5	ZFHX3|5;RP11-346C20.3|5;HCCAT5|4;C16orf47|4;LINC01572|3;
UKB_23099_Body_fat_percentage|region1466	5	5	ZFHX3|5;RP11-346C20.3|5;HCCAT5|4;C16orf47|4;LINC01572|3;
UKB_23099_Body_fat_percentage|region1507	5	2	ASB16|4;UBTF|1;
UKB_23099_Body_fat_percentage|region399	5	9	IDUA|5;SLC26A1|4;DGKQ|3;TMEM175|2;GAK|2;PCGF3|1;MAEA|1;LOC100129917|1;CRIPAK|1;
UKB_6152_9_diagnosed_by_doctor_Hayfever_allergic_rhinitis_or_eczema|region1129	5	4	OVOL1|5;OVOL1-AS1|4;AP5B1|4;SNX32|1;
UKB_6152_9_diagnosed_by_doctor_Hayfever_allergic_rhinitis_or_eczema|region657	5	11	ZBTB22|5;WDR46|5;VPS52|5;TAPBP|5;RPS18|5;RGL2|5;PHF1|5;DAXX|5;PFDN6|1;KIFC1|1;B3GALT4|1;
UKB_6152_9_diagnosed_by_doctor_Hayfever_allergic_rhinitis_or_eczema|region764	5	2	JAZF1-AS1|5;JAZF1|5;
Astle_et_al_2016_Eosinophil_counts|region1028	4	3	LOC105376468|4;WAC-AS1|3;WAC|3;
Astle_et_al_2016_Eosinophil_counts|region1610	4	1	BAX|4;
Astle_et_al_2016_Eosinophil_counts|region6	4	2	PIK3CD-AS1|4;PIK3CD|4;
Astle_et_al_2016_Granulocyte_count|region1585	4	4	S1PR2|3;MRPL4|3;DNMT1|3;ICAM5|1;
Astle_et_al_2016_High_light_scatter_reticulocyte_count|region745	4	6	LFNG|3;BRAT1|3;IQCE|2;CHST12|2;TTYH3|1;LOC101927181|1;
Astle_et_al_2016_Monocyte_count|region1501	4	6	CCL2|4;CCL8|3;CCL7|3;CCL11|3;CCL13|1;CCL1|1;
Astle_et_al_2016_Monocyte_count|region745	4	2	AMZ1|4;GNA12|3;
Astle_et_al_2016_Myeloid_white_cell_count|region883	4	1	LYN|4;
Astle_et_al_2016_Neutrophil_count|region1585	4	4	S1PR2|3;MRPL4|3;DNMT1|3;ICAM5|1;
Astle_et_al_2016_Neutrophil_count|region883	4	1	LYN|4;
Astle_et_al_2016_Platelet_count|region104	4	2	NUAK2|4;TMCC2|1;
Astle_et_al_2016_Platelet_count|region1376	4	4	BRF1|3;PACS2|2;MTA1|1;BTBD6|1;
Astle_et_al_2016_Platelet_count|region1648	4	3	RTF2|4;RPL39P|4;CASS4|4;
Astle_et_al_2016_Platelet_count|region703	4	1	DDO|4;
Astle_et_al_2016_Platelet_count|region745	4	2	AMZ1|4;GNA12|3;
Astle_et_al_2016_Platelet_count|region869	4	2	RBPMS-AS1|4;RBPMS|4;
Astle_et_al_2016_Red_blood_cell_count|region1591	4	10	LSM4|4;ELL|4;PGPEP1|3;KIAA1683|3;JUND|3;LRRC25|2;LOC729966|2;LOC102725254|2;GDF15|2;SSBP4|1;
Astle_et_al_2016_Sum_basophil_neutrophil_counts|region1585	4	4	S1PR2|3;MRPL4|3;DNMT1|3;ICAM5|1;
Astle_et_al_2016_Sum_basophil_neutrophil_counts|region883	4	1	LYN|4;
Astle_et_al_2016_Sum_eosinophil_basophil_counts|region1028	4	3	LOC105376468|4;WAC-AS1|3;WAC|3;
Astle_et_al_2016_Sum_eosinophil_basophil_counts|region1367	4	1	RIN3|4;
Astle_et_al_2016_Sum_eosinophil_basophil_counts|region1610	4	1	BAX|4;
Astle_et_al_2016_Sum_neutrophil_eosinophil_counts|region1585	4	4	S1PR2|3;MRPL4|3;DNMT1|3;ICAM5|1;
Astle_et_al_2016_White_blood_cell_count|region883	4	1	LYN|4;
CARDIoGRAM_C4D_CAD_ADDITIVE|region1101	4	7	SWAP70|4;SBF2-AS1|4;LOC440028|2;WEE1|1;TMEM9B-AS1|1;SBF2|1;RPL21P97|1;
GIANT_HEIGHT|region1374	4	1	ANKRD9|4;
GIANT_HEIGHT|region598	4	12	PDLIM4|3;P4HA2|3;SLC22A5|2;LOC553103|2;SLC22A4|1;RAPGEF6|1;RAD50|1;MIR3936HG|1;FNIP1|1;CSF2|1;CDC42SE2|1;C5orf56|1;
IBD.EUR.Inflammatory_Bowel_Disease|region1059	4	32	ZMIZ1-AS1|4;ZMIZ1|4;ZCCHC24|4;TMEM254-AS1|4;TMEM254|4;RPS24|4;PPIF|4;POLR3A|4;LOC102723703|4;FAM213A|4;BMS1P21|4;ANXA11|4;LOC101929574|3;LINC00857|3;LINC00856|3;DLG5-AS1|3;DLG5|3;SH2D4B|2;SFTPD|2;SFTPA2|2;SFTPA1|2;PLAC9|2;MBL1P|2;MAT1A|2;LINC00595|2;KCNMA1-AS3|2;KCNMA1|2;DYDC2|2;DYDC1|2;TSPAN14|1;NUTM2B-AS1|1;LOC642361|1;
IBD.EUR.Inflammatory_Bowel_Disease|region190	4	16	IL1RL2|4;IL1R2|4;IL1R1|4;IL18R1|4;IL1RL1|3;TMEM182|1;TBC1D8-AS1|1;TBC1D8|1;SLC9A4|1;SLC9A2|1;RFX8|1;MFSD9|1;MAP4K4|1;LINC01127|1;IL18RAP|1;CREG2|1;
pgc.scz2|region1373	4	10	BCL11B|4;C14orf177|2;LOC101929241|1;LOC100129345|1;LINC01550|1;HHIPL1|1;EVL|1;EML1|1;CYP46A1|1;CCDC85C|1;
RA_OKADA_TRANS_ETHNIC|region1173	4	11	LOC101929517|4;ETS1|4;LOC101929538|2;KCNJ1|2;FLI1|2;TP53AIP1|1;SENCR|1;LOC399975|1;KCNJ5|1;C11orf45|1;ARHGAP32|1;
UKB_20002_1065_self_reported_hypertension|region1063	4	2	OPN4|4;LDB3|3;
UKB_20002_1065_self_reported_hypertension|region118	4	2	AGT|4;COG2|1;
UKB_20002_1065_self_reported_hypertension|region1578	4	5	ATP8B3|4;REXO1|3;LOC100288123|3;TCF3|2;KLF16|2;
UKB_20002_1065_self_reported_hypertension|region8	4	16	MTHFR|4;CLCN6|4;AGTRAP|3;SRM|1;NPPB|1;NPPA-AS1|1;NPPA|1;MIIP|1;MFN2|1;MAD2L2|1;LOC102724659|1;FBXO6|1;FBXO44|1;FBXO2|1;DRAXIN|1;C1orf167|1;
UKB_20002_1065_self_reported_hypertension|region866	4	1	EBF2|4;
UKB_20002_1226_self_reported_hypothyroidism_or_myxoedema|region1390	4	3	RASGRP1|4;FAM98B|1;C15orf53|1;
UKB_20002_1226_self_reported_hypothyroidism_or_myxoedema|region1583	4	1	INSR|4;
UKB_20002_1265_self_reported_migraine|region77	4	51	TSACC|4;RRNAD1|4;RP11-284F21.8|4;PMF1|4;MEF2D|4;LMNA|4;NAXE|3;IQGAP3|3;GPATCH4|3;YY1AP1|1;UBQLN4|1;TTC24|1;TMEM79|1;SYT11|1;SSR2|1;SMG5|1;SLC25A44|1;SH2D2A|1;RXFP4|1;RIT1|1;PRCC|1;PMF1-BGLAP|1;PEAR1|1;PAQR6|1;NTRK1|1;NES|1;MSTO2P|1;MSTO1|1;MRPL24|1;MEX3A|1;LRRC71|1;LAMTOR2|1;KIRREL-IT1|1;KIRREL|1;KIAA0907|1;ISG20L2|1;INSRR|1;HDGF|1;HAPLN2|1;GON4L|1;GLMP|1;ETV3|1;DAP3|1;CRABP2|1;CD1D|1;CCT3|1;BCAN…
UKB_20022_Birth_weight|region982	4	13	PTCH1|4;LOC100507346|4;RP11-435O5.5|2;RP11-435O5.4|2;FANCC|2;ERCC6L2|2;EIF4BP3|2;ZNF169|1;SLC35D2|1;LOC158434|1;LINC00476|1;LINC00092|1;C9orf3|1;
UKB_20127_Neuroticism_score|region655	4	12	TNXB|4;ATF6B|4;STK19|3;SKIV2L|3;LY6G5B|3;EGFL8|3;C4A|3;PRRT1|2;PPT2-EGFL8|2;PPT2|2;LOC100507547|2;FKBPL|2;
UKB_21001_Body_mass_index_BMI|region601	4	11	UBE2D2|4;SPATA24|4;PURA|4;PSD2-AS1|4;PSD2|4;PROB1|4;LINC01024|4;ECSCR|4;DNAJC18|4;CYSTM1|4;CXXC5|4;
UKB_23099_Body_fat_percentage|region1497	4	1	KCNJ12|4;
UKB_23099_Body_fat_percentage|region601	4	11	UBE2D2|4;SPATA24|4;PURA|4;PSD2-AS1|4;PSD2|4;PROB1|4;LINC01024|4;ECSCR|4;DNAJC18|4;CYSTM1|4;CXXC5|4;
UKB_2395_3_Hair_or_balding_pattern_Pattern_3|region272	4	5	TWIST2|4;TRAF3IP1|4;PER2|4;NDUFA10|4;ASB1|4;
UKB_2395_4_Hair_or_balding_pattern_Pattern_4|region272	4	5	TWIST2|4;TRAF3IP1|4;PER2|4;NDUFA10|4;ASB1|4;
UKB_50_Standing_height|region1243	4	2	MVK|4;MMAB|2;
UKB_50_Standing_height|region1497	4	2	KCNJ12|4;KCNJ18|1;
UKB_6152_8_diagnosed_by_doctor_Asthma|region653	4	36	ZNRD1|2;TRIM40|2;TRIM39-RPP21|2;TRIM39|2;TRIM31|2;TRIM26|2;TRIM15|2;TRIM10|2;RPP21|2;NRM|2;MDC1|2;HLA-L|2;HCG18|2;HCG17|2;FLOT1|2;DHX16|2;VARS2|1;TUBB|1;TCF19|1;PRR3|1;PPP1R18|1;PPP1R10|1;MRPS18B|1;MICA|1;LINC00243|1;IER3|1;HLA-E|1;HLA-C|1;HLA-B|1;HCG21|1;GTF2H4|1;GNL1|1;CCHCR1|1;C6orf136|1;ATAT1|1;ABCF1|1;
Astle_et_al_2016_Eosinophil_counts|region1367	3	1	RIN3|3;
Astle_et_al_2016_Eosinophil_counts|region1480	3	26	ZFPM1|3;ZC3H18|2;LOC100128882|2;ZNF778|1;TRAPPC2L|1;SNAI3-AS1|1;SNAI3|1;SLC7A5|1;RNF166|1;PIEZO1|1;MVD|1;LOC102724467|1;LOC100287036|1;LOC100129697|1;LINC02182|1;KLHDC4|1;IL17C|1;GAS8|1;GALNS|1;DBNDD1|1;CYBA|1;CTU2|1;CDH15|1;BANP|1;APRT|1;ACSF3|1;
Astle_et_al_2016_Eosinophil_counts|region275	3	4	NEU4|2;GAL3ST2|2;D2HGDH|1;AC114730.3|1;
Astle_et_al_2016_Eosinophil_counts|region652	3	15	ZFP57|3;RPL23AP1|2;HLA-U|2;HLA-K|2;HLA-H|2;HCP5B|2;HCG4P3|2;HCG4|2;XXbac-BPG170G13.32|1;TRIM31|1;RNF39|1;IFITM4P|1;HLA-J|1;HCG4P5|1;HCG4B|1;
Astle_et_al_2016_Granulocyte_count|region1039	3	1	CXCL12|3;
Astle_et_al_2016_Granulocyte_count|region776	3	6	UPP1|3;TNS3|3;LINC01447|3;HUS1|3;C7orf57|3;IGFBP3|1;
Astle_et_al_2016_Granulocyte_count|region883	3	1	LYN|3;
Astle_et_al_2016_Granulocyte_count|region935	3	9	WASHC1|3;RP11-59O6.3|3;DOCK8|3;CBWD1|3;LINC01230|2;KANK1|2;DMRT2|2;DMRT1|2;C9orf66|2;
Astle_et_al_2016_High_light_scatter_reticulocyte_count|region104	3	5	DSTYK|2;CNTN2|2;TMCC2|1;LOC101929459|1;CDK18|1;
Astle_et_al_2016_High_light_scatter_reticulocyte_count|region1185	3	30	RIMKLB|3;SLC2A3|1;PZP|1;PHC1|1;NECAP1|1;MFAP5|1;M6PR|1;LOC642846|1;LOC374443|1;LOC101928030|1;LINC00937|1;LINC00612|1;KLRG1|1;KLRC4|1;FAM90A1|1;FAM86FP|1;FAM66C|1;CLEC7A|1;CLEC4E|1;CLEC4D|1;CLEC2B|1;CLEC2A|1;CLEC1A|1;CD69|1;CD163|1;C3AR1|1;AICDA|1;A2ML1|1;A2M-AS1|1;A2M|1;
Astle_et_al_2016_High_light_scatter_reticulocyte_count|region1578	3	2	SBNO2|3;GPX4|1;
Astle_et_al_2016_High_light_scatter_reticulocyte_count|region1687	3	7	GAS2L1|3;THOC5|2;RHBDD3|2;RASL10A|2;EWSR1|2;AP1B1|2;MTMR3|1;
Astle_et_al_2016_Lymphocyte_counts|region1355	3	12	ZC2HC1C|3;TTLL5|3;PROX2|3;NEK9|3;LOC102724153|3;LINC01220|3;JDP2|3;IFT43|3;FOS|3;FLVCR2|3;C14orf1|3;BATF|3;
Astle_et_al_2016_Lymphocyte_counts|region1496	3	18	DRC3|3;TOM1L2|2;SREBF1|2;SMCR5|2;SMCR2|2;RAI1-AS1|2;RAI1|2;PEMT|2;GID4|2;DRG2|2;ATPAF2|2;SHMT1|1;RP11-815I9.4|1;MYO15A|1;MPRIP|1;LINC02076|1;FLCN|1;EVPLL|1;
Astle_et_al_2016_Lymphocyte_counts|region450	3	9	C4orf22|3;ANTXR2|3;PRDM8|2;PAQR3|2;FGF5|2;LINC01094|1;LINC01088|1;BMP3|1;BMP2K|1;
Astle_et_al_2016_Monocyte_count|region1039	3	1	CXCL12|3;
Astle_et_al_2016_Monocyte_count|region38	3	8	TM2D1|3;PATJ|3;NFIA-AS1|3;NFIA|3;LOC101926964|3;L1TD1|3;NFIA-AS2|2;MGC34796|1;
Astle_et_al_2016_Myeloid_white_cell_count|region1039	3	1	CXCL12|3;
Astle_et_al_2016_Myeloid_white_cell_count|region776	3	6	UPP1|3;TNS3|3;LINC01447|3;HUS1|3;C7orf57|3;IGFBP3|1;
Astle_et_al_2016_Myeloid_white_cell_count|region935	3	9	WASHC1|3;RP11-59O6.3|3;DOCK8|3;CBWD1|3;LINC01230|2;KANK1|2;DMRT2|2;DMRT1|2;C9orf66|2;
Astle_et_al_2016_Neutrophil_count|region1039	3	1	CXCL12|3;
Astle_et_al_2016_Neutrophil_count|region776	3	6	UPP1|3;TNS3|3;LINC01447|3;HUS1|3;C7orf57|3;IGFBP3|1;
Astle_et_al_2016_Neutrophil_count|region935	3	9	WASHC1|3;RP11-59O6.3|3;DOCK8|3;CBWD1|3;LINC01230|2;KANK1|2;DMRT2|2;DMRT1|2;C9orf66|2;
Astle_et_al_2016_Platelet_count|region1686	3	1	MN1|3;
Astle_et_al_2016_Platelet_count|region24	3	6	MFSD2A|3;TRIT1|2;MYCL|2;LOC101929536|2;CAP1|2;BMP8B|2;
Astle_et_al_2016_Platelet_count|region323	3	10	RYBP|3;SHQ1|1;LOC105377162|1;LINC00877|1;LINC00870|1;GXYLT2|1;GPR27|1;FOXP1-AS1|1;EIF4E3|1;EBLN2|1;
Astle_et_al_2016_Platelet_count|region803	3	13	POP7|2;MOSPD3|2;ZASP|1;TFR2|1;SAP25|1;PCOLCE-AS1|1;PCOLCE|1;LOC105375429|1;GNB2|1;GIGYF1|1;EPO|1;EPHB4|1;ACTL6B|1;
Astle_et_al_2016_Red_blood_cell_count|region1106	3	3	ZDHHC13|3;E2F8|3;LOC100126784|2;
Astle_et_al_2016_Red_blood_cell_count|region1668	3	11	SLC5A3|3;MRPS6|3;LOC101928126|3;LINC00649|3;ATP5O|3;SMIM11B|2;SMIM11A|2;RUNX1|2;RCAN1|2;LINC01426|2;DONSON|2;
Astle_et_al_2016_Red_blood_cell_count|region311	3	2	ITIH1|2;ITIH4|1;
Astle_et_al_2016_Red_blood_cell_count|region542	3	9	TTC23L|3;RAI14|3;RAD1|3;DNAJC21|3;BRIX1|3;TARS|2;SPEF2|2;AMACR|2;ADAMTS12|2;
Astle_et_al_2016_Red_blood_cell_count|region651	3	2	ZNF311|3;HCG15|3;
Astle_et_al_2016_Reticulocyte_count|region104	3	13	DSTYK|2;CNTN2|2;TMEM81|1;TMCC2|1;SLC41A1|1;SLC26A9|1;RBBP5|1;RAB29|1;NUAK2|1;LOC284578|1;LOC101929459|1;LEMD1-AS1|1;CDK18|1;
Astle_et_al_2016_Sum_basophil_neutrophil_counts|region1039	3	1	CXCL12|3;
Astle_et_al_2016_Sum_basophil_neutrophil_counts|region776	3	6	UPP1|3;TNS3|3;LINC01447|3;HUS1|3;C7orf57|3;IGFBP3|1;
Astle_et_al_2016_Sum_basophil_neutrophil_counts|region935	3	9	WASHC1|3;RP11-59O6.3|3;DOCK8|3;CBWD1|3;LINC01230|2;KANK1|2;DMRT2|2;DMRT1|2;C9orf66|2;
Astle_et_al_2016_Sum_eosinophil_basophil_counts|region275	3	4	NEU4|2;GAL3ST2|2;D2HGDH|1;AC114730.3|1;
Astle_et_al_2016_Sum_eosinophil_basophil_counts|region584	3	3	WDR36|3;CTC-551A13.2|2;TSLP|1;
Astle_et_al_2016_Sum_eosinophil_basophil_counts|region6	3	2	PIK3CD-AS1|3;PIK3CD|3;
Astle_et_al_2016_Sum_eosinophil_basophil_counts|region652	3	15	ZFP57|3;RPL23AP1|2;HLA-U|2;HLA-K|2;HLA-H|2;HCP5B|2;HCG4P3|2;HCG4|2;XXbac-BPG170G13.32|1;TRIM31|1;RNF39|1;IFITM4P|1;HLA-J|1;HCG4P5|1;HCG4B|1;
Astle_et_al_2016_Sum_eosinophil_basophil_counts|region939	3	8	RCL1|3;JAK2|2;RLN1|1;PLPP6|1;PLGRKT|1;CDC37L1-AS1|1;CDC37L1|1;AK3|1;
Astle_et_al_2016_Sum_neutrophil_eosinophil_counts|region1039	3	1	CXCL12|3;
Astle_et_al_2016_Sum_neutrophil_eosinophil_counts|region776	3	6	UPP1|3;TNS3|3;LINC01447|3;HUS1|3;C7orf57|3;IGFBP3|1;
Astle_et_al_2016_Sum_neutrophil_eosinophil_counts|region883	3	1	LYN|3;
Astle_et_al_2016_Sum_neutrophil_eosinophil_counts|region935	3	9	WASHC1|3;RP11-59O6.3|3;DOCK8|3;CBWD1|3;LINC01230|2;KANK1|2;DMRT2|2;DMRT1|2;C9orf66|2;
Astle_et_al_2016_White_blood_cell_count|region1028	3	3	LOC105376468|3;WAC-AS1|2;WAC|2;
Astle_et_al_2016_White_blood_cell_count|region1039	3	1	CXCL12|3;
Astle_et_al_2016_White_blood_cell_count|region1503	3	4	ARHGAP23|3;SOCS7|2;LOC440434|1;HNF1B|1;
Astle_et_al_2016_White_blood_cell_count|region776	3	6	UPP1|3;TNS3|3;LINC01447|3;HUS1|3;C7orf57|3;IGFBP3|1;
Astle_et_al_2016_White_blood_cell_count|region935	3	9	WASHC1|3;RP11-59O6.3|3;DOCK8|3;CBWD1|3;LINC01230|2;KANK1|2;DMRT2|2;DMRT1|2;C9orf66|2;
BCAC_ER_negative_BreastCancer_EUR|region1196	3	2	PTHLH|2;PPFIBP1|1;
BCAC_ER_negative_BreastCancer_EUR|region235	3	2	DLX2-AS1|3;DLX2|3;
BCAC_Overall_BreastCancer_EUR|region1078	3	9	TCF7L2|3;ZDHHC6|2;VTI1A|2;LOC103344931|2;HABP2|1;GPAM|1;AFAP1L2|1;ADRB1|1;ACSL5|1;
BCAC_Overall_BreastCancer_EUR|region1196	3	2	PTHLH|2;PPFIBP1|1;
BCAC_Overall_BreastCancer_EUR|region521	3	1	TERT|3;
CARDIoGRAM_C4D_CAD_ADDITIVE|region1318	3	16	RAB20|3;NAXD|3;MYO16-AS1|3;LOC101060553|3;LINC00399|3;IRS2|3;COL4A2-AS1|3;COL4A2|3;COL4A1|3;CARS2|3;ARHGEF7|3;MYO16|2;LINC00431|2;LINC00346|2;COL4A2-AS2|2;ARHGEF7-AS2|2;
EAGLE_Eczema|region1164	3	49	CXCR5|3;RPS25|2;DDX6|2;CCDC84|2;BCL9L|2;VPS11|1;USP2-AS1|1;USP2|1;UPK2|1;UBE4A|1;TTC36|1;TREH|1;TRAPPC4|1;TMPRSS4-AS1|1;TMEM25|1;TMEM136|1;SLC37A4|1;SIDT2|1;RNF26|1;PHLDB1|1;OAF|1;NLRX1|1;NECTIN1|1;MPZL3|1;MPZL2|1;MFRP|1;LOC649133|1;LOC102724301|1;LOC101929089|1;LOC100131626|1;KMT2A|1;JAML|1;IL10RA|1;IFT46|1;HYOU1|1;HMBS|1;HINFP|1;H2AFX|1;FXYD6-FXYD2|1;FXYD6|1;FXYD2|1;CD3E|1;CCDC153|1;CBL|1;C2CD2…
GIANT_HEIGHT|region1132	3	3	ANO1|3;LOC101928443|2;ANO1-AS2|2;
GIANT_HEIGHT|region1330	3	21	PSMA6|3;PPP2R3C|3;NFKBIA|3;FAM177A1|3;SPTSSA|2;RALGAPA1P1|2;RALGAPA1|2;MIPOL1|2;MBIP|2;KIAA0391|2;EGLN3|2;EAPP|2;CFL2|2;BRMS1L|2;SRP54|1;SNX6|1;PAX9|1;NKX2-1-AS1|1;NKX2-1|1;LINC00609|1;INSM2|1;
GIANT_HEIGHT|region714	3	9	TMEM244|2;TMEM200A|2;PTPRK|2;LAMA2|2;L3MBTL3|2;EPB41L2|2;ARHGAP18|2;AKAP7|2;RP1-69D17.3|1;
IBD.EUR.Crohns_Disease|region1059	3	31	ZMIZ1-AS1|3;ZMIZ1|3;ZCCHC24|3;TMEM254-AS1|3;TMEM254|3;RPS24|3;PPIF|3;POLR3A|3;LOC102723703|3;FAM213A|3;DLG5-AS1|3;DLG5|3;BMS1P21|3;ANXA11|3;SH2D4B|2;SFTPD|2;SFTPA2|2;SFTPA1|2;PLAC9|2;MBL1P|2;MAT1A|2;LOC101929574|2;LINC00857|2;LINC00856|2;KCNMA1-AS3|2;KCNMA1|2;DYDC2|2;DYDC1|2;NUTM2B-AS1|1;LOC642361|1;LINC00595|1;
IBD.EUR.Crohns_Disease|region700	3	10	PRDM1|3;RTN4IP1|1;QRSL1|1;PREP|1;POPDC3|1;HACE1|1;C6orf203|1;BVES-AS1|1;BVES|1;ATG5|1;
IBD.EUR.Ulcerative_Colitis|region1266	3	18	RASL11A|3;WASF3|2;USP12-AS2|2;USP12|2;RPL21P28|2;RPL21|2;RNF6|2;CDK8|2;USP12-AS1|1;SHISA2|1;PLUT|1;PDX1|1;PAN3-AS1|1;PAN3|1;LNX2|1;LINC00543|1;GTF3A|1;FLT3|1;
IBD.EUR.Ulcerative_Colitis|region1701	3	28	PIM3|2;IL17REL|2;CRELD2|2;ALG12|2;ZBED4|1;TUBGCP6|1;TRABD|1;SYCE3|1;SHANK3|1;SELENOO|1;SBF1|1;RPL23AP82|1;RABL2B|1;PLXNB2|1;NCAPH2|1;MLC1|1;MAPK12|1;MAPK11|1;LMF2|1;LINC01310|1;HDAC10|1;DENND6B|1;CHKB-CPT1B|1;CHKB-AS1|1;CHKB|1;C22orf34|1;BRD1|1;ADM2|1;
PGC_ADHD_EUR_2017|region1231	3	5	POC1B|3;GALNT4|3;DUSP6|3;POC1B-GALNT4|2;C12orf29|2;
pgc.scz2|region654	3	1	VARS2|3;
RA_OKADA_TRANS_ETHNIC|region295	3	2	EOMES|3;LINC01981|1;
RA_OKADA_TRANS_ETHNIC|region579	3	2	C5orf30|3;PPIP5K2|2;
SSGAC_Education_Years_Pooled|region571	3	17	TMEM161B-AS1|3;TMEM161B|3;LINC00461|3;RASA1|2;POLR3G|2;MEF2C-AS1|2;MEF2C|2;MBLAC2|2;LYSMD3|2;LOC731157|2;LOC644285|2;LOC101929380|2;LINC02060|2;LINC01339|2;CETN3|2;CCNH|2;ADGRV1|2;
UKB_1180_Morning_or_evening_person_chronotype|region571	3	2	MEF2C-AS1|3;MEF2C|3;
UKB_20002_1065_self_reported_hypertension|region1649	3	26	ZNF831|3;SLMO2-ATP5E|3;PRELID3B|3;LOC101927932|3;GNAS-AS1|3;VAPB|2;TUBB1|2;SYCP2|2;STX16-NPEPL1|2;STX16|2;RAB22A|2;PPP4R1L|2;PPP1R3D|2;PMEPA1|2;NPEPL1|2;NKILA|2;NELFCD|2;MTRNR2L3|2;MIR646HG|2;LINC01711|2;GNAS|2;FAM217B|2;CTSZ|2;C20orf197|2;ATP5E|2;ANKRD60|2;
UKB_20002_1065_self_reported_hypertension|region839	3	8	SHH|3;RNF32|3;NOM1|3;LOC100506585|3;LINC01006|3;DNAJB6|3;CNPY1|3;C7orf13|3;
UKB_20002_1111_self_reported_asthma|region82	3	21	CD247|3;RP11-104L21.3|2;UCK2|1;TMCO1|1;TIPRL|1;TADA1|1;SFT2D2|1;POU2F1|1;POGK|1;MPZL1|1;MGST3|1;LOC440700|1;LOC100147773|1;ILDR2|1;GPR161|1;GPA33|1;DPT|1;CREG1|1;CCDC181|1;ATP1B1|1;ALDH9A1|1;
UKB_20002_1226_self_reported_hypothyroidism_or_myxoedema|region651	3	2	ZNF311|3;HCG15|3;
UKB_20002_1226_self_reported_hypothyroidism_or_myxoedema|region851	3	12	PRAG1|3;FAM86B3P|3;TNKS|2;PPP1R3B|2;MSRA|2;MFHAS1|2;MCPH1-AS1|2;FAM66B|2;ERI1|2;DEFB1|2;CLDN23|2;AGPAT5|2;
UKB_20002_1473_self_reported_high_cholesterol|region611	3	19	MED7|3;HAVCR1|3;TIMD4|2;THG1L|2;SOX30|2;SGCD|2;NIPAL4|2;LSM11|2;LOC102724404|2;LINC02227|2;LINC02202|2;ITK|2;HAVCR2|2;FNDC9|2;EBF1|2;CYFIP2|2;CLINT1|2;C5orf52|2;ADAM19|2;
UKB_20022_Birth_weight|region1701	3	7	PIM3|3;ZBED4|2;SELENOO|2;MOV10L1|2;CRELD2|2;BRD1|2;ALG12|2;
UKB_20022_Birth_weight|region728	3	14	ESR1|3;VIP|2;SYNE1-AS1|2;SYNE1|2;RMND1|2;RGS17|2;PLEKHG1|2;MYCT1|2;MTRF1L|2;MTHFD1L|2;FBXO5|2;CCDC170|2;ARMT1|2;AKAP12|2;
UKB_20127_Neuroticism_score|region1527	3	11	CHMP6|3;BAIAP2-AS1|3;BAIAP2|3;TEPSIN|1;RPTOR|1;NDUFAF8|1;LOC100294362|1;ENDOV|1;CEP131|1;AATK-AS1|1;AATK|1;
UKB_21001_Body_mass_index_BMI|region1411	3	3	ADPGK-AS1|3;ADPGK|3;CTD-2524L6.3|2;
UKB_21001_Body_mass_index_BMI|region1415	3	13	CEMIP|3;ABHD17C|3;TMC3-AS1|2;STARD5|2;MESDC2|2;MESDC1|2;ARNT2|2;RP11-28H5.2|1;MTHFS|1;IL16|1;FAH|1;CFAP161|1;BCL2A1|1;
UKB_21001_Body_mass_index_BMI|region146	3	1	ADCY3|3;
UKB_21001_Body_mass_index_BMI|region1600	3	34	KCTD15|3;ZNF792|1;ZNF599|1;ZNF507|1;ZNF30-AS1|1;ZNF302|1;ZNF30|1;ZNF181|1;WTIP|1;WDR88|1;UBA2|1;SCGB1B2P|1;RHPN2|1;RGS9BP|1;PEPD|1;PDCD5|1;PDCD2L|1;NUDT19|1;LSM14A|1;LRP3|1;LOC400684|1;LINC01801|1;KIAA0355|1;HPN|1;GRAMD1A|1;GPI|1;GPATCH1|1;FAAP24|1;DPY19L3|1;CEP89|1;CEBPG|1;CEBPA-AS1|1;CEBPA|1;ANKRD27|1;
UKB_23099_Body_fat_percentage|region1411	3	3	ADPGK-AS1|3;ADPGK|3;CTD-2524L6.3|2;
UKB_23099_Body_fat_percentage|region1415	3	13	CEMIP|3;ABHD17C|3;TMC3-AS1|2;STARD5|2;MESDC2|2;MESDC1|2;ARNT2|2;RP11-28H5.2|1;MTHFS|1;IL16|1;FAH|1;CFAP161|1;BCL2A1|1;
UKB_23099_Body_fat_percentage|region146	3	1	ADCY3|3;
UKB_23099_Body_fat_percentage|region1509	3	3	SNF8|3;IGF2BP1|3;GIP|3;
UKB_23099_Body_fat_percentage|region4	3	7	THAP3|3;ZBTB48|2;PHF13|2;KLHL21|2;TAS1R1|1;PLEKHG5|1;NOL9|1;
UKB_50_Standing_height|region0	3	4	AGRN|3;RP11-54O7.17|2;ISG15|1;HES4|1;
UKB_50_Standing_height|region274	3	1	KIF1A|3;
UKB_50_Standing_height|region323	3	10	RYBP|3;SHQ1|1;LOC105377162|1;LINC00877|1;LINC00870|1;GXYLT2|1;GPR27|1;FOXP1-AS1|1;EIF4E3|1;EBLN2|1;
UKB_50_Standing_height|region491	3	2	HHIP-AS1|3;HHIP|3;
UKB_6152_8_diagnosed_by_doctor_Asthma|region82	3	21	CD247|3;RP11-104L21.3|2;UCK2|1;TMCO1|1;TIPRL|1;TADA1|1;SFT2D2|1;POU2F1|1;POGK|1;MPZL1|1;MGST3|1;LOC440700|1;LOC100147773|1;ILDR2|1;GPR161|1;GPA33|1;DPT|1;CREG1|1;CCDC181|1;ATP1B1|1;ALDH9A1|1;
UKB_6152_8_diagnosed_by_doctor_Asthma|region938	3	1	GLIS3|3;
UKB_6152_9_diagnosed_by_doctor_Hayfever_allergic_rhinitis_or_eczema|region1330	3	22	PSMA6|3;PPP2R3C|3;NFKBIA|3;FAM177A1|3;SRP54|1;SPTSSA|1;SNX6|1;SLC25A21-AS1|1;SLC25A21|1;RALGAPA1P1|1;RALGAPA1|1;PAX9|1;NKX2-8|1;MIPOL1|1;MBIP|1;KIAA0391|1;INSM2|1;EGLN3|1;EAPP|1;CFL2|1;BRMS1L|1;BAZ1A|1;
Astle_et_al_2016_Eosinophil_counts|region1050	2	16	ZNF365|2;RTKN2|2;RHOBTB1|2;REEP3|2;NRBF2|2;LOC283045|2;LOC105378330|2;JMJD1C-AS1|2;JMJD1C|2;EGR2|2;CDK1|2;ADO|2;TMEM26-AS1|1;TMEM26|1;C10orf107|1;ARID5B|1;
Astle_et_al_2016_Eosinophil_counts|region1330	2	4	PSMA6|2;PPP2R3C|2;NFKBIA|2;FAM177A1|2;
Astle_et_al_2016_Eosinophil_counts|region1509	2	11	ZNF652|2;SPOP|2;PHB|2;LOC102724596|2;ABI3|2;SNF8|1;PHOSPHO1|1;NGFR|1;GIP|1;DLX3|1;B4GALNT2|1;
Astle_et_al_2016_Eosinophil_counts|region924	2	10	PVT1|2;TMEM75|1;MYC|1;LINC00977|1;LINC00824|1;CCAT2|1;CCAT1|1;CASC21|1;CASC19|1;CASC11|1;
Astle_et_al_2016_Eosinophil_counts|region939	2	2	RCL1|2;JAK2|1;
Astle_et_al_2016_Granulocyte_count|region1483	2	2	MYO1C|2;CRK|2;
Astle_et_al_2016_Granulocyte_count|region1495	2	34	ZSWIM7|2;ZNF624|2;ZNF287|2;ZNF286A|2;UBB|2;TVP23C-CDRT4|2;TVP23C|2;TTC19|2;TRPV2|2;TRIM16|2;TEKT3|2;RASD1|2;PLD6|2;PIGL|2;NT5M|2;NCOR1|2;MPRIP|2;MGC12916|2;MEIS3P1|2;MED9|2;LRRC75A-AS1|2;LRRC75A|2;HS3ST3B1|2;FLCN|2;CENPV|2;CCDC144A|2;ADORA2B|2;RAI1-AS1|1;PEMT|1;GID4|1;COPS3|1;CDRT8|1;CDRT4|1;ATPAF2|1;
Astle_et_al_2016_Granulocyte_count|region732	2	33	TAGAP|2;RSPH3|2;LOC102724053|2;FNDC1|2;DYNLT1|2;ZDHHC14|1;WTAP|1;TULP4|1;TMEM242|1;TMEM181|1;TCP1|1;SYTL3|1;SYNJ2|1;SOD2|1;SNX9|1;SLC22A1|1;SERAC1|1;PNLDC1|1;MRPL18|1;MAS1|1;MAP3K4|1;LPAL2|1;LPA|1;LOC729603|1;LOC101929122|1;LOC100129518|1;IGF2R|1;GTF2H5|1;EZR-AS1|1;EZR|1;C6orf99|1;AIRN|1;ACAT2|1;
Astle_et_al_2016_Granulocyte_count|region923	2	3	WASHC5|2;NSMCE2|2;TRIB1|1;
Astle_et_al_2016_High_light_scatter_reticulocyte_count|region1101	2	7	SWAP70|2;SBF2-AS1|2;LOC440028|2;WEE1|1;TMEM9B-AS1|1;SBF2|1;RPL21P97|1;
Astle_et_al_2016_High_light_scatter_reticulocyte_count|region1481	2	7	TUBB3|2;MC1R|2;TCF25|1;RPL13|1;GAS8|1;CENPBD1|1;AFG3L1P|1;
Astle_et_al_2016_High_light_scatter_reticulocyte_count|region1664	2	3	RWDD2B|2;LTN1|2;AF129075.5|2;
Astle_et_al_2016_High_light_scatter_reticulocyte_count|region293	2	2	THRB-AS1|2;THRB|2;
Astle_et_al_2016_High_light_scatter_reticulocyte_count|region552	2	2	LINC01948|1;C5orf67|1;
Astle_et_al_2016_High_light_scatter_reticulocyte_count|region623	2	4	LINC01485|2;CPEB4|2;HMP19|1;BOD1|1;
Astle_et_al_2016_High_light_scatter_reticulocyte_count|region632	2	1	LINC01600|2;
Astle_et_al_2016_High_light_scatter_reticulocyte_count|region652	2	18	HLA-H|2;GABBR1|2;ZNRD1ASP|1;ZNRD1|1;ZFP57|1;TRIM15|1;RNF39|1;PPP1R11|1;OR2H2|1;LOC554223|1;IFITM4P|1;HLA-J|1;HLA-G|1;HLA-F-AS1|1;HLA-F|1;HLA-A|1;HCG4B|1;HCG4|1;
Astle_et_al_2016_Lymphocyte_counts|region1050	2	11	NRBF2|2;LOC283045|2;EGR2|2;ADO|2;ZNF365|1;RTKN2|1;RHOBTB1|1;JMJD1C-AS1|1;JMJD1C|1;CDK1|1;ARID5B|1;
Astle_et_al_2016_Lymphocyte_counts|region1086	2	3	FAM53B-AS1|2;FAM53B|2;EEF1AKMT2|2;
Astle_et_al_2016_Lymphocyte_counts|region1164	2	1	NLRX1|2;
Astle_et_al_2016_Lymphocyte_counts|region1634	2	2	COMMD7|2;DNMT3B|1;
Astle_et_al_2016_Lymphocyte_counts|region323	2	7	SAMMSON|2;PROK2|2;LINC00877|2;GPR27|2;FOXP1-AS1|2;FOXP1|2;EIF4E3|2;
Astle_et_al_2016_Lymphocyte_counts|region658	2	8	FKBP5|2;TEAD3|1;RPL10A|1;PPARD|1;LOC285847|1;FANCE|1;DEF6|1;ARMC12|1;
Astle_et_al_2016_Lymphocyte_counts|region908	2	7	RNF19A|2;SPAG1|1;RGS22|1;POLR2K|1;KB-1991G8.1|1;FBXO43|1;ANKRD46|1;
Astle_et_al_2016_Monocyte_count|region1072	2	3	LINC01475|2;NKX2-3|1;GOT1|1;
Astle_et_al_2016_Monocyte_count|region1131	2	2	ORAOV1|2;LTO1|2;
Astle_et_al_2016_Monocyte_count|region1367	2	1	RIN3|2;
Astle_et_al_2016_Monocyte_count|region293	2	2	THRB-AS1|2;THRB|2;
Astle_et_al_2016_Monocyte_count|region607	2	2	CSF1R|2;PDGFRB|1;
Astle_et_al_2016_Monocyte_count|region998	2	5	NEK6|2;STRBP|1;PSMB7|1;LOC100129034|1;DENND1A|1;
Astle_et_al_2016_Myeloid_white_cell_count|region1070	2	25	FRAT2|2;FRAT1|2;ZFYVE27|1;ZDHHC16|1;UBTD1|1;TM9SF3|1;SLIT1|1;RRP12|1;PIK3AP1|1;PI4K2A|1;PGAM1|1;MORN4|1;MMS19|1;MARVELD1|1;LOXL4|1;LOC102723665|1;LINC00866|1;LCOR|1;HOGA1|1;EXOSC1|1;CRTAC1|1;AVPI1|1;ARHGAP19-SLIT1|1;ARHGAP19|1;ANKRD2|1;
Astle_et_al_2016_Myeloid_white_cell_count|region1483	2	2	MYO1C|2;CRK|2;
Astle_et_al_2016_Myeloid_white_cell_count|region732	2	33	TAGAP|2;RSPH3|2;LOC102724053|2;FNDC1|2;DYNLT1|2;ZDHHC14|1;WTAP|1;TULP4|1;TMEM242|1;TMEM181|1;TCP1|1;SYTL3|1;SYNJ2|1;SOD2|1;SNX9|1;SLC22A1|1;SERAC1|1;PNLDC1|1;MRPL18|1;MAS1|1;MAP3K4|1;LPAL2|1;LPA|1;LOC729603|1;LOC101929122|1;LOC100129518|1;IGF2R|1;GTF2H5|1;EZR-AS1|1;EZR|1;C6orf99|1;AIRN|1;ACAT2|1;
Astle_et_al_2016_Myeloid_white_cell_count|region923	2	3	WASHC5|2;NSMCE2|2;TRIB1|1;
Astle_et_al_2016_Neutrophil_count|region1173	2	10	LOC101929517|2;ETS1|2;SENCR|1;LOC399975|1;LOC101929538|1;KCNJ5|1;KCNJ1|1;FLI1|1;C11orf45|1;BARX2|1;
Astle_et_al_2016_Neutrophil_count|region1483	2	2	MYO1C|2;CRK|2;
Astle_et_al_2016_Neutrophil_count|region1495	2	34	ZSWIM7|2;ZNF624|2;ZNF287|2;ZNF286A|2;UBB|2;TVP23C-CDRT4|2;TVP23C|2;TTC19|2;TRPV2|2;TRIM16|2;TEKT3|2;RASD1|2;PLD6|2;PIGL|2;NT5M|2;NCOR1|2;MPRIP|2;MGC12916|2;MEIS3P1|2;MED9|2;LRRC75A-AS1|2;LRRC75A|2;HS3ST3B1|2;FLCN|2;CENPV|2;CCDC144A|2;ADORA2B|2;RAI1-AS1|1;PEMT|1;GID4|1;COPS3|1;CDRT8|1;CDRT4|1;ATPAF2|1;
Astle_et_al_2016_Neutrophil_count|region732	2	33	TAGAP|2;RSPH3|2;LOC102724053|2;FNDC1|2;DYNLT1|2;ZDHHC14|1;WTAP|1;TULP4|1;TMEM242|1;TMEM181|1;TCP1|1;SYTL3|1;SYNJ2|1;SOD2|1;SNX9|1;SLC22A1|1;SERAC1|1;PNLDC1|1;MRPL18|1;MAS1|1;MAP3K4|1;LPAL2|1;LPA|1;LOC729603|1;LOC101929122|1;LOC100129518|1;IGF2R|1;GTF2H5|1;EZR-AS1|1;EZR|1;C6orf99|1;AIRN|1;ACAT2|1;
Astle_et_al_2016_Neutrophil_count|region923	2	3	WASHC5|2;NSMCE2|2;TRIB1|1;
Astle_et_al_2016_Platelet_count|region1170	2	17	ST3GAL4|2;GSEC|2;DCPS|2;TIRAP|1;SRPRA|1;SLC37A2|1;RPUSD4|1;PUS3|1;NRGN|1;HP11014|1;FOXRED1|1;FAM118B|1;EI24|1;CHEK1|1;CDON|1;CCDC15|1;ACRV1|1;
Astle_et_al_2016_Platelet_count|region1183	2	46	CD9|2;ZNF384|1;VWF|1;VAMP1|1;USP5|1;TNFRSF1A|1;TIGAR|1;TAPBPL|1;SLC2A14|1;RAD51AP1|1;PTMS|1;PLEKHG6|1;PEX5|1;P3H3|1;NTF3|1;NOP2|1;NDUFA9|1;NCAPD2|1;MRPL51|1;MLF2|1;LTBR|1;LRRC23|1;LPCAT3|1;LPAR5|1;ING4|1;IFFO1|1;GPR162|1;GAPDH|1;ENO2|1;DYRK4|1;COPS7A|1;CLSTN3|1;CHD4|1;CDCA3|1;CD4|1;CD27-AS1|1;CD163L1|1;CD163|1;CCND2|1;C1S|1;C1RL-AS1|1;C1RL|1;C1R|1;C12orf4|1;AKAP3|1;ACRBP|1;
Astle_et_al_2016_Platelet_count|region1407	2	23	PLEKHO2|2;ZNF609|1;TRIP4|1;SPG21|1;SNX22|1;RBPMS2|1;PPIB|1;PIF1|1;PDCD7|1;PCLAF|1;PARP16|1;OAZ2|1;MTFMT|1;LOC102723344|1;INTS14|1;HERC1|1;HACD3|1;DPP8|1;DAPK2|1;CSNK1G1|1;CLPX|1;CA12|1;ANKDD1A|1;
Astle_et_al_2016_Platelet_count|region1436	2	2	USP7|2;LOC105371074|1;
Astle_et_al_2016_Platelet_count|region1590	2	23	USE1|2;OCEL1|2;NR2F6|2;MYO9B|2;HAUS8|2;BABAM1|2;ANKLE1|2;USHBP1|1;TMEM38A|1;TMEM221|1;SMIM7|1;SIN3B|1;NWD1|1;MVB12A|1;MRPL34|1;MED26|1;GTPBP3|1;F2RL3|1;DDA1|1;BST2|1;BISPR|1;ANO8|1;ABHD8|1;
Astle_et_al_2016_Platelet_count|region1602	2	2	SPINT2|1;C19orf33|1;
Astle_et_al_2016_Platelet_count|region1649	2	12	TUBB1|2;SYCP2|2;STX16-NPEPL1|2;STX16|2;SLMO2-ATP5E|2;PRELID3B|2;NELFCD|2;LOC101927932|2;LINC01711|2;GNAS|2;CTSZ|2;ATP5E|2;
Astle_et_al_2016_Platelet_count|region17	2	6	UBXN11|1;TMEM50A|1;SDHDP6|1;RSRP1|1;RP3-465N24.5|1;RHD|1;
Astle_et_al_2016_Platelet_count|region405	2	17	WFS1|2;TBC1D14|2;TADA2B|2;SORCS2|2;S100P|2;MRFAP1L1|2;MRFAP1|2;MAN2B2|2;LOC93622|2;LOC105374366|2;LOC100129931|2;KIAA0232|2;GRPEL1|2;FLJ36777|2;CCDC96|2;BLOC1S4|2;AFAP1|2;
Astle_et_al_2016_Platelet_count|region71	2	3	TENT5C|2;LOC100996263|2;FAM46C|2;
Astle_et_al_2016_Platelet_count|region736	2	1	C6orf118|2;
Astle_et_al_2016_Red_blood_cell_count|region1	2	2	PRDM16|2;LINC00982|2;
Astle_et_al_2016_Red_blood_cell_count|region1072	2	3	NKX2-3|2;LINC01475|2;GOT1|1;
Astle_et_al_2016_Red_blood_cell_count|region1579	2	2	DOT1L|2;AP3D1|2;
Astle_et_al_2016_Red_blood_cell_count|region1689	2	1	FBXO7|2;
Astle_et_al_2016_Red_blood_cell_count|region1697	2	3	WNT7B|2;FBLN1|1;ATXN10|1;
Astle_et_al_2016_Red_blood_cell_count|region293	2	2	THRB-AS1|2;THRB|2;
Astle_et_al_2016_Red_blood_cell_count|region610	2	13	SAP30L-AS1|2;SAP30L|2;LARP1|2;KIF4B|2;GEMIN5|2;SGCD|1;MRPL22|1;MFAP3|1;HAND1|1;GALNT10|1;FAXDC2|1;FAM114A2|1;CNOT8|1;
Astle_et_al_2016_Red_blood_cell_count|region718	2	4	HBS1L|2;SLC2A12|1;MYB|1;HMGA1P7|1;
Astle_et_al_2016_Red_blood_cell_count|region777	2	8	ZPBP|2;IKZF1|2;GRB10|2;FIGNL1|2;DDC-AS1|2;DDC|2;C7orf72|2;COBL|1;
Astle_et_al_2016_Reticulocyte_count|region1101	2	7	SWAP70|2;SBF2-AS1|2;LOC440028|2;WEE1|1;TMEM9B-AS1|1;SBF2|1;RPL21P97|1;
Astle_et_al_2016_Reticulocyte_count|region1438	2	5	ZC3H7A|2;SOCS1|2;RMI2|2;PRM2|2;LOC105371083|2;
Astle_et_al_2016_Reticulocyte_count|region1481	2	7	TUBB3|2;MC1R|2;TCF25|1;RPL13|1;GAS8|1;CENPBD1|1;AFG3L1P|1;
Astle_et_al_2016_Reticulocyte_count|region1520	2	17	WIPI1|2;PRKAR1A|2;SLC16A6|1;PRO1804|1;MAP2K6|1;LOC440461|1;LOC105371880|1;LINC01482|1;LINC01028|1;LINC00674|1;KPNA2|1;KCNJ2-AS1|1;KCNJ2|1;ARSG|1;ABCA9|1;ABCA6|1;ABCA5|1;
Astle_et_al_2016_Reticulocyte_count|region1664	2	3	RWDD2B|2;LTN1|2;AF129075.5|2;
Astle_et_al_2016_Reticulocyte_count|region293	2	2	THRB-AS1|2;THRB|2;
Astle_et_al_2016_Reticulocyte_count|region395	2	10	XXYLT1-AS2|2;XXYLT1|2;TNK2-AS1|2;TMEM44|2;PPP1R2|2;LINC01983|2;LINC00969|2;FAM43A|2;APOD|2;ACAP2|2;
Astle_et_al_2016_Reticulocyte_count|region552	2	2	LINC01948|1;C5orf67|1;
Astle_et_al_2016_Reticulocyte_count|region623	2	4	LINC01485|2;CPEB4|2;HMP19|1;BOD1|1;
Astle_et_al_2016_Sum_basophil_neutrophil_counts|region1483	2	2	MYO1C|2;CRK|2;
Astle_et_al_2016_Sum_basophil_neutrophil_counts|region1495	2	34	ZSWIM7|2;ZNF624|2;ZNF287|2;ZNF286A|2;UBB|2;TVP23C-CDRT4|2;TVP23C|2;TTC19|2;TRPV2|2;TRIM16|2;TEKT3|2;RASD1|2;PLD6|2;PIGL|2;NT5M|2;NCOR1|2;MPRIP|2;MGC12916|2;MEIS3P1|2;MED9|2;LRRC75A-AS1|2;LRRC75A|2;HS3ST3B1|2;FLCN|2;CENPV|2;CCDC144A|2;ADORA2B|2;RAI1-AS1|1;PEMT|1;GID4|1;COPS3|1;CDRT8|1;CDRT4|1;ATPAF2|1;
Astle_et_al_2016_Sum_basophil_neutrophil_counts|region732	2	33	TAGAP|2;RSPH3|2;LOC102724053|2;FNDC1|2;DYNLT1|2;ZDHHC14|1;WTAP|1;TULP4|1;TMEM242|1;TMEM181|1;TCP1|1;SYTL3|1;SYNJ2|1;SOD2|1;SNX9|1;SLC22A1|1;SERAC1|1;PNLDC1|1;MRPL18|1;MAS1|1;MAP3K4|1;LPAL2|1;LPA|1;LOC729603|1;LOC101929122|1;LOC100129518|1;IGF2R|1;GTF2H5|1;EZR-AS1|1;EZR|1;C6orf99|1;AIRN|1;ACAT2|1;
Astle_et_al_2016_Sum_basophil_neutrophil_counts|region923	2	3	WASHC5|2;NSMCE2|2;TRIB1|1;
Astle_et_al_2016_Sum_eosinophil_basophil_counts|region1050	2	16	ZNF365|2;RTKN2|2;RHOBTB1|2;REEP3|2;NRBF2|2;LOC283045|2;LOC105378330|2;JMJD1C-AS1|2;JMJD1C|2;EGR2|2;CDK1|2;ADO|2;TMEM26-AS1|1;TMEM26|1;C10orf107|1;ARID5B|1;
Astle_et_al_2016_Sum_eosinophil_basophil_counts|region1330	2	4	PSMA6|2;PPP2R3C|2;NFKBIA|2;FAM177A1|2;
Astle_et_al_2016_Sum_eosinophil_basophil_counts|region1509	2	11	ZNF652|2;SPOP|2;PHB|2;LOC102724596|2;ABI3|2;SNF8|1;PHOSPHO1|1;NGFR|1;GIP|1;DLX3|1;B4GALNT2|1;
Astle_et_al_2016_Sum_eosinophil_basophil_counts|region188	2	5	TMEM127|1;SNRNP200|1;LOC105373496|1;CIAO1|1;ARID5A|1;
Astle_et_al_2016_Sum_eosinophil_basophil_counts|region191	2	2	IL18R1|2;IL1RL1|1;
Astle_et_al_2016_Sum_eosinophil_basophil_counts|region924	2	10	PVT1|2;TMEM75|1;MYC|1;LINC00977|1;LINC00824|1;CCAT2|1;CCAT1|1;CASC21|1;CASC19|1;CASC11|1;
Astle_et_al_2016_Sum_neutrophil_eosinophil_counts|region1483	2	2	MYO1C|2;CRK|2;
Astle_et_al_2016_Sum_neutrophil_eosinophil_counts|region1495	2	34	ZSWIM7|2;ZNF624|2;ZNF287|2;ZNF286A|2;UBB|2;TVP23C-CDRT4|2;TVP23C|2;TTC19|2;TRPV2|2;TRIM16|2;TEKT3|2;RASD1|2;PLD6|2;PIGL|2;NT5M|2;NCOR1|2;MPRIP|2;MGC12916|2;MEIS3P1|2;MED9|2;LRRC75A-AS1|2;LRRC75A|2;HS3ST3B1|2;FLCN|2;CENPV|2;CCDC144A|2;ADORA2B|2;RAI1-AS1|1;PEMT|1;GID4|1;COPS3|1;CDRT8|1;CDRT4|1;ATPAF2|1;
Astle_et_al_2016_Sum_neutrophil_eosinophil_counts|region1503	2	2	ARHGAP23|2;SOCS7|1;
Astle_et_al_2016_Sum_neutrophil_eosinophil_counts|region732	2	33	TAGAP|2;RSPH3|2;LOC102724053|2;FNDC1|2;DYNLT1|2;ZDHHC14|1;WTAP|1;TULP4|1;TMEM242|1;TMEM181|1;TCP1|1;SYTL3|1;SYNJ2|1;SOD2|1;SNX9|1;SLC22A1|1;SERAC1|1;PNLDC1|1;MRPL18|1;MAS1|1;MAP3K4|1;LPAL2|1;LPA|1;LOC729603|1;LOC101929122|1;LOC100129518|1;IGF2R|1;GTF2H5|1;EZR-AS1|1;EZR|1;C6orf99|1;AIRN|1;ACAT2|1;
Astle_et_al_2016_Sum_neutrophil_eosinophil_counts|region923	2	3	WASHC5|2;NSMCE2|2;TRIB1|1;
Astle_et_al_2016_White_blood_cell_count|region1007	2	1	INPP5E|2;
Astle_et_al_2016_White_blood_cell_count|region1008	2	1	FUT7|2;
Astle_et_al_2016_White_blood_cell_count|region1070	2	25	FRAT2|2;FRAT1|2;ZFYVE27|1;ZDHHC16|1;UBTD1|1;TM9SF3|1;SLIT1|1;RRP12|1;PIK3AP1|1;PI4K2A|1;PGAM1|1;MORN4|1;MMS19|1;MARVELD1|1;LOXL4|1;LOC102723665|1;LINC00866|1;LCOR|1;HOGA1|1;EXOSC1|1;CRTAC1|1;AVPI1|1;ARHGAP19-SLIT1|1;ARHGAP19|1;ANKRD2|1;
Astle_et_al_2016_White_blood_cell_count|region1172	2	26	TP53AIP1|2;SENCR|2;LOC399975|2;LOC101929538|2;LOC101929517|2;LINC02098|2;KIRREL3-AS3|2;KIRREL3|2;KCNJ5|2;KCNJ1|2;FLI1|2;ETS1|2;C11orf45|2;BARX2|2;ARHGAP32|2;TMEM45B|1;TIRAP|1;ST3GAL4|1;ST14|1;SRPRA|1;RPUSD4|1;LINC01395|1;GSEC|1;FOXRED1|1;FAM118B|1;DCPS|1;
Astle_et_al_2016_White_blood_cell_count|region1472	2	4	CMIP|2;PLCG2|1;LOC100129617|1;BCO1|1;
Astle_et_al_2016_White_blood_cell_count|region1590	2	19	WIZ|2;TMEM38A|2;SMIM7|2;SLC35E1|2;SIN3B|2;RAB8A|2;OR10H3|2;NWD1|2;MED26|2;KLF2|2;HSH2D|2;GTPBP3|2;FAM32A|2;EPS15L1|2;CIB3|2;CHERP|2;CALR3|2;C19orf44|2;AP1M1|2;
Astle_et_al_2016_White_blood_cell_count|region240	2	2	LINC01934|2;ITGA4|2;
Astle_et_al_2016_White_blood_cell_count|region732	2	33	TAGAP|2;RSPH3|2;LOC102724053|2;FNDC1|2;DYNLT1|2;ZDHHC14|1;WTAP|1;TULP4|1;TMEM242|1;TMEM181|1;TCP1|1;SYTL3|1;SYNJ2|1;SOD2|1;SNX9|1;SLC22A1|1;SERAC1|1;PNLDC1|1;MRPL18|1;MAS1|1;MAP3K4|1;LPAL2|1;LPA|1;LOC729603|1;LOC101929122|1;LOC100129518|1;IGF2R|1;GTF2H5|1;EZR-AS1|1;EZR|1;C6orf99|1;AIRN|1;ACAT2|1;
BCAC_Overall_BreastCancer_EUR|region510	2	1	ADAM29|2;
CARDIoGRAM_C4D_CAD_ADDITIVE|region1030	2	1	KIAA1462|2;
EGG_BW3_EUR|region372	2	11	VEPH1|2;TIPARP-AS1|2;TIPARP|2;SSR3|2;RSRC1|2;PTX3|2;PQLC2L|2;LINC02029|2;LINC00886|2;LINC00881|2;LEKR1|2;
GIANT_HEIGHT|region1105	2	4	NUCB2|2;NCR3LG1|2;LOC105376575|2;KCNJ11|1;
GIANT_HEIGHT|region1408	2	31	TIPIN|2;SMAD6|2;SMAD3|2;PIAS1|2;MAP2K5|2;LOC102723493|2;LOC101929076|2;LINC02206|2;IQCH-AS1|2;IQCH|2;DIS3L|2;CLN6|2;C15orf61|2;AAGAB|2;ZWILCH|1;SPESP1|1;SNAPC5|1;RPL4|1;RAB11A|1;NOX5|1;MAP2K1|1;LCTL|1;ITGA11|1;HACD3|1;FEM1B|1;DENND4A|1;CORO2B|1;CLPX|1;CALML4|1;ANP32A-IT1|1;ANP32A|1;
GIANT_HEIGHT|region16	2	1	CLIC4|2;
GIANT_HEIGHT|region217	2	7	ZEB2|2;ZEB2-AS1|1;LOC105373656|1;LOC101928386|1;LINC01412|1;KYNU|1;GTDC1|1;
GIANT_HEIGHT|region491	2	2	HHIP-AS1|2;HHIP|2;
GIANT_HEIGHT|region788	2	1	METTL27|2;
GIANT_HEIGHT|region863	2	38	XPO7|2;EGR3|2;BIN3|2;TNFRSF10D|1;TNFRSF10C|1;TNFRSF10B|1;TNFRSF10A|1;SORBS3|1;SLC39A14|1;SLC25A37|1;RHOBTB2|1;REEP4|1;R3HCC1|1;PPP3CC|1;POLR3D|1;PEBP4|1;PDLIM2|1;NUDT18|1;NPM2|1;NKX3-1|1;LOC389641|1;LOC286059|1;LOC254896|1;LOC102467222|1;LOC101929237|1;LOC100507156|1;LGI3|1;FGF17|1;FAM160B2|1;ENTPD4|1;DMTN|1;CHMP7|1;CCAR2|1;C8orf58|1;BMP1|1;BIN3-IT1|1;ADAMDEC1|1;ADAM28|1;
GIANT_HEIGHT|region91	2	3	SMG7|1;NCF2|1;COLGALT2|1;
IBD.EUR.Crohns_Disease|region1578	2	4	TMEM259|2;SBNO2|2;GPX4|2;POLR2E|1;
IBD.EUR.Crohns_Disease|region923	2	1	TRIB1|2;
IBD.EUR.Inflammatory_Bowel_Disease|region1454	2	10	CYLD|2;SNX20|1;PAPD5|1;NOD2|1;NKD1|1;LOC101927272|1;HEATR3|1;CNEP1R1|1;BRD7|1;ADCY7|1;
IBD.EUR.Inflammatory_Bowel_Disease|region1578	2	4	TMEM259|2;SBNO2|2;GPX4|2;POLR2E|1;
IBD.EUR.Inflammatory_Bowel_Disease|region923	2	1	TRIB1|2;
pgc.scz2|region1174	2	5	SNX19|2;NTM-AS1|2;LOC100507431|2;ADAMTS8|2;ADAMTS15|2;
pgc.scz2|region745	2	12	MAD1L1|2;TTYH3|1;SNX8|1;NUDT1|1;MRM2|1;MICALL2|1;IQCE|1;GPR146|1;GNA12|1;EIF3B|1;CHST12|1;BRAT1|1;
RA_OKADA_TRANS_ETHNIC|region1390	2	3	RASGRP1|2;FAM98B|1;C15orf53|1;
RA_OKADA_TRANS_ETHNIC|region1477	2	4	IRF8|2;FENDRR|2;EMC8|2;COX4I1|2;
RA_OKADA_TRANS_ETHNIC|region732	2	33	TAGAP|2;ZDHHC14|1;WTAP|1;TULP4|1;TMEM242|1;TMEM181|1;TCP1|1;SYTL3|1;SYNJ2|1;SOD2|1;SNX9|1;SLC22A1|1;SERAC1|1;RSPH3|1;PNLDC1|1;MRPL18|1;MAS1|1;MAP3K4|1;LPAL2|1;LPA|1;LOC729603|1;LOC102724053|1;LOC101929122|1;LOC100129518|1;IGF2R|1;GTF2H5|1;FNDC1|1;EZR-AS1|1;EZR|1;DYNLT1|1;C6orf99|1;AIRN|1;ACAT2|1;
RA_OKADA_TRANS_ETHNIC|region75	2	1	IL6R|2;
SSGAC_Education_Years_Pooled|region1212	2	6	RPS26|1;RDH5|1;PYM1|1;ITGA7|1;BLOC1S1-RDH5|1;BLOC1S1|1;
SSGAC_Education_Years_Pooled|region1309	2	17	STK24|2;UBAC2-AS1|1;UBAC2|1;TM9SF2|1;STK24-AS1|1;RAP2A|1;PCCA|1;OXGR1|1;MBNL2|1;LOC105370333|1;LINC01232|1;LINC00449|1;LINC00359|1;GPR183|1;FARP1|1;DOCK9-AS2|1;CLYBL|1;
SSGAC_Education_Years_Pooled|region1586	2	7	TRMT1|2;TNPO2|1;NFIX|1;NACC1|1;LYL1|1;GADD45GIP1|1;FBXW9|1;
SSGAC_Education_Years_Pooled|region401	2	1	MSANTD1|2;
SSGAC_Education_Years_Pooled|region649	2	15	ZNF322|2;LOC105374988|2;HMGN4|2;HIST1H4H|2;HIST1H4F|2;HIST1H3G|2;HIST1H3F|2;HIST1H3E|2;HIST1H2BI|2;HIST1H2BH|2;HIST1H2BG|2;HIST1H2AE|2;HIST1H1D|2;BTN3A2|2;BTN2A3P|2;
UKB_20002_1065_self_reported_hypertension|region1129	2	9	SNX32|1;RNASEH2C|1;PCNX3|1;OVOL1-AS1|1;OVOL1|1;MAP3K11|1;KCNK7|1;EFEMP2|1;AP5B1|1;
UKB_20002_1065_self_reported_hypertension|region1159	2	2	SIK2|2;LAYN|1;
UKB_20002_1065_self_reported_hypertension|region226	2	2	PKP4|2;CCDC148|2;
UKB_20002_1065_self_reported_hypertension|region309	2	2	MAP4|1;FBXW12|1;
UKB_20002_1065_self_reported_hypertension|region552	2	2	LINC01948|1;C5orf67|1;
UKB_20002_1065_self_reported_hypertension|region853	2	23	XKR6|2;TNKS|2;RP1L1|2;PPP1R3B|2;PINX1|2;MSRA|2;MFHAS1|2;LOC101929269|2;LOC101929229|2;LINCR-0001|2;LINC00599|2;ERI1|2;CLDN23|2;NEIL2|1;MTMR9|1;LOC157273|1;GATA4|1;FDFT1|1;FAM86B1|1;FAM167A-AS1|1;FAM167A|1;CTSB|1;C8orf74|1;
UKB_20002_1111_self_reported_asthma|region1159	2	2	SIK2|2;PPP2R1B|1;
UKB_20002_1111_self_reported_asthma|region1233	2	5	PLXNC1|2;TMCC3|1;NDUFA12|1;CEP83-AS1|1;CEP83|1;
UKB_20002_1111_self_reported_asthma|region1438	2	9	SOCS1|2;RMI2|2;LOC105371083|2;ATF7IP2|2;SNN|1;PRM3|1;LITAF|1;DEXI|1;CLEC16A|1;
UKB_20002_1111_self_reported_asthma|region1599	2	2	CEBPA-AS1|2;CEBPA|2;
UKB_20002_1111_self_reported_asthma|region275	2	4	GAL3ST2|2;NEU4|1;D2HGDH|1;AC114730.3|1;
UKB_20002_1111_self_reported_asthma|region649	2	15	ZNF322|2;LOC105374988|2;HMGN4|2;HIST1H4H|2;HIST1H4F|2;HIST1H3G|2;HIST1H3F|2;HIST1H3E|2;HIST1H2BI|2;HIST1H2BH|2;HIST1H2BG|2;HIST1H2AE|2;HIST1H1D|2;BTN3A2|2;BTN2A3P|2;
UKB_20002_1111_self_reported_asthma|region653	2	24	NRM|2;MDC1|2;FLOT1|2;DHX16|2;VARS2|1;TUBB|1;TCF19|1;PRR3|1;PPP1R18|1;PPP1R10|1;MRPS18B|1;MICA|1;LINC00243|1;IER3|1;HLA-E|1;HLA-C|1;HLA-B|1;HCG21|1;GTF2H4|1;GNL1|1;CCHCR1|1;C6orf136|1;ATAT1|1;ABCF1|1;
UKB_20002_1226_self_reported_hypothyroidism_or_myxoedema|region1590	2	6	KIAA1683|2;JUND|2;IQCN|2;PGPEP1|1;PDE4C|1;LSM4|1;
UKB_20002_1226_self_reported_hypothyroidism_or_myxoedema|region1692	2	3	RP1-151B14.6|2;IL2RB|2;C1QTNF6|2;
UKB_20002_1226_self_reported_hypothyroidism_or_myxoedema|region349	2	3	POGLUT1|2;TMEM39A|1;TIMMDC1|1;
UKB_20002_1226_self_reported_hypothyroidism_or_myxoedema|region579	2	2	PPIP5K2|2;C5orf30|2;
UKB_20002_1226_self_reported_hypothyroidism_or_myxoedema|region630	2	4	IRF4|2;FOXF2|1;EXOC2|1;DUSP22|1;
UKB_20002_1226_self_reported_hypothyroidism_or_myxoedema|region652	2	1	UBD|2;
UKB_20002_1226_self_reported_hypothyroidism_or_myxoedema|region940	2	5	RLN2|2;RLN1|2;PLGRKT|2;INSL6|2;CD274|2;
UKB_20002_1265_self_reported_migraine|region1212	2	9	STAT6|2;LRP1-AS|2;LRP1|2;ZBTB39|1;STAC3|1;SHMT2|1;NEMP1|1;NDUFA4L2|1;NAB2|1;
UKB_20002_1265_self_reported_migraine|region70	2	16	VANGL1|2;TSPAN2|2;SLC22A15|2;SIKE1|2;NRAS|2;NGF|2;LOC101928977|2;DENND2C|2;CSDE1|2;BCAS2|2;TRIM33|1;PTGFRN|1;OLFML3|1;CD58|1;CASQ2|1;ATP1A1-AS1|1;
UKB_20002_1452_self_reported_eczema_or_dermatitis|region1438	2	4	SOCS1|2;PRM3|1;DEXI|1;CLEC16A|1;
UKB_20002_1452_self_reported_eczema_or_dermatitis|region75	2	1	IL6R|2;
UKB_20002_1453_self_reported_psoriasis|region1173	2	2	LOC101929517|2;ETS1|2;
UKB_20002_1463_self_reported_ulcerative_colitis|region12	2	1	OTUD3|2;
UKB_20002_1473_self_reported_high_cholesterol|region654	2	11	XXbac-BPG248L24.12|2;TCF19|2;SKIV2L|2;NFKBIL1|2;MICA|2;LY6G5B|2;HLA-B|2;DHX16|2;ATF6B|2;HLA-C|1;HCG27|1;
UKB_20016_Fluid_intelligence_score|region1073	2	11	KCNIP2-AS1|2;KCNIP2|2;HPS6|2;PPRC1|1;POLL|1;NPM3|1;MGEA5|1;LDB1|1;FBXW4|1;DPCD|1;C10orf76|1;
UKB_20022_Birth_weight|region372	2	11	VEPH1|2;TIPARP-AS1|2;TIPARP|2;SSR3|2;RSRC1|2;PTX3|2;PQLC2L|2;LINC02029|2;LINC00886|2;LINC00881|2;LEKR1|2;
UKB_20127_Neuroticism_score|region514	2	2	TENM3|2;LOC90768|2;
UKB_21001_Body_mass_index_BMI|region1	2	3	PLCH2|1;PANK4|1;MMEL1|1;
UKB_21001_Body_mass_index_BMI|region1074	2	2	AS3MT|2;BORCS7|1;
UKB_21001_Body_mass_index_BMI|region1497	2	2	KCNJ18|1;KCNJ12|1;
UKB_21001_Body_mass_index_BMI|region1507	2	1	ASB16|2;
UKB_21001_Body_mass_index_BMI|region19	2	42	COL16A1|2;ZCCHC17|1;ZBTB8OS|1;ZBTB8B|1;ZBTB8A|1;YARS|1;TXLNA|1;TSSK3|1;TMEM54|1;TMEM39B|1;TMEM234|1;TINAGL1|1;SYNC|1;SPOCD1|1;SNRNP40|1;SERINC2|1;SDC3|1;RBBP4|1;PUM1|1;PEF1|1;NKAIN1|1;MTMR9LP|1;MARCKSL1|1;LINC01225|1;LCK|1;LAPTM5|1;KPNA6|1;KIAA1522|1;KHDRBS1|1;IQCC|1;HDAC1|1;HCRTR1|1;FNDC5|1;FAM229A|1;FAM167B|1;FABP3|1;EIF3I|1;DCDC2B|1;CCDC28B|1;BSDC1|1;AK2|1;ADGRB2|1;
UKB_21001_Body_mass_index_BMI|region401	2	6	MSANTD1|2;ZBTB49|1;LYAR|1;LRPAP1|1;DOK7|1;ADRA2C|1;
UKB_21001_Body_mass_index_BMI|region571	2	1	LINC00461|2;
UKB_21001_Body_mass_index_BMI|region599	2	6	JADE2|2;UBE2B|1;LOC102546229|1;LINC01843|1;CDKN2AIPNL|1;CDKL3|1;
UKB_23099_Body_fat_percentage|region1055	2	1	ADAMTS14|2;
UKB_23099_Body_fat_percentage|region1160	2	2	NCAM1|2;LOC101928847|2;
UKB_23099_Body_fat_percentage|region1231	2	14	POC1B-GALNT4|2;POC1B|2;GALNT4|2;DUSP6|2;C12orf29|2;TMTC3|1;RP11-1109F11.5|1;LUM|1;LOC728084|1;LOC105369891|1;KITLG|1;CEP290|1;ATP2B1-AS1|1;ATP2B1|1;
UKB_23099_Body_fat_percentage|region1692	2	2	MAFF|2;PLA2G6|1;
UKB_23099_Body_fat_percentage|region248	2	6	ANKRD44-IT1|2;ANKRD44|2;PGAP1|1;LOC101927596|1;GTF3C3|1;CCDC150|1;
UKB_23099_Body_fat_percentage|region28	2	5	TAL1|2;STIL|1;PDZK1IP1|1;LINC00853|1;CMPK1|1;
UKB_23099_Body_fat_percentage|region571	2	1	LINC00461|2;
UKB_2395_3_Hair_or_balding_pattern_Pattern_3|region610	2	7	SAP30L-AS1|2;SAP30L|2;MRPL22|2;MFAP3|2;HAND1|2;FAM114A2|2;GALNT10|1;
UKB_2395_4_Hair_or_balding_pattern_Pattern_4|region741	2	1	LOC285804|2;
UKB_50_Standing_height|region1018	2	22	USP6NL|2;UPF2|2;SFTA1P|2;SEPHS1|2;SEC61A2|2;PRPF18|2;PROSER2-AS1|2;PROSER2|2;PHYH|2;OPTN|2;NUDT5|2;MCM10|2;LOC101928322|2;ECHDC3|2;DHTKD1|2;CELF2-AS2|2;CELF2-AS1|2;CELF2|2;CDC123|2;CCDC3|2;CAMK1D|2;BEND7|2;
UKB_50_Standing_height|region1081	2	1	CACUL1|2;
UKB_50_Standing_height|region1188	2	1	ETV6|2;
UKB_50_Standing_height|region137	2	21	RRM2|2;LOC101929882|2;KLF11|2;YWHAQ|1;TAF1B|1;RN7SL832P|1;PDIA6|1;ODC1|1;NOL10|1;LOC101929715|1;LINC01954|1;KCNF1|1;ITGB1BP1|1;IAH1|1;HPCAL1|1;GRHL1|1;CYS1|1;CPSF3|1;C2orf48|1;ATP6V1C2|1;ADAM17|1;
UKB_50_Standing_height|region1540	2	1	CABLES1|2;
UKB_50_Standing_height|region1671	2	1	KCNJ15|2;
UKB_50_Standing_height|region366	2	8	ZIC4|2;ZIC1|2;PLSCR4|2;PLSCR1|2;PLOD2|2;LOC440982|2;LINC02032|2;AGTR1|2;
UKB_50_Standing_height|region400	2	7	TMEM129|2;TACC3|2;SLBP|2;FAM53A|2;RP11-572O17.1|1;LETM1|1;FGFR3|1;
UKB_50_Standing_height|region595	2	1	ZNF608|2;
UKB_50_Standing_height|region603	2	2	NR3C1|1;ARHGAP26-IT1|1;
UKB_50_Standing_height|region777	2	5	DDC-AS1|2;ZPBP|1;FIGNL1|1;DDC|1;C7orf72|1;
UKB_50_Standing_height|region876	2	1	SFRP1|2;
UKB_6152_8_diagnosed_by_doctor_Asthma|region1159	2	2	SIK2|2;PPP2R1B|1;
UKB_6152_8_diagnosed_by_doctor_Asthma|region1233	2	5	PLXNC1|2;TMCC3|1;NDUFA12|1;CEP83-AS1|1;CEP83|1;
UKB_6152_8_diagnosed_by_doctor_Asthma|region1438	2	9	SOCS1|2;RMI2|2;LOC105371083|2;ATF7IP2|2;SNN|1;PRM3|1;LITAF|1;DEXI|1;CLEC16A|1;
UKB_6152_8_diagnosed_by_doctor_Asthma|region1599	2	2	CEBPA-AS1|2;CEBPA|2;
UKB_6152_8_diagnosed_by_doctor_Asthma|region275	2	4	GAL3ST2|2;NEU4|1;D2HGDH|1;AC114730.3|1;
UKB_6152_8_diagnosed_by_doctor_Asthma|region649	2	15	ZNF322|2;LOC105374988|2;HMGN4|2;HIST1H4H|2;HIST1H4F|2;HIST1H3G|2;HIST1H3F|2;HIST1H3E|2;HIST1H2BI|2;HIST1H2BH|2;HIST1H2BG|2;HIST1H2AE|2;HIST1H1D|2;BTN3A2|2;BTN2A3P|2;
UKB_6152_9_diagnosed_by_doctor_Hayfever_allergic_rhinitis_or_eczema|region1164	2	1	CXCR5|2;
UKB_6152_9_diagnosed_by_doctor_Hayfever_allergic_rhinitis_or_eczema|region1496	2	16	SMCR5|2;RAI1|2;SREBF1|1;SHMT1|1;RPL13P12|1;RASD1|1;RAI1-AS1|1;PEMT|1;NT5M|1;MIEF2|1;MED9|1;GID4|1;FLII|1;FLCN|1;DRG2|1;ATPAF2|1;
UKB_6152_9_diagnosed_by_doctor_Hayfever_allergic_rhinitis_or_eczema|region1599	2	2	CEBPA-AS1|2;CEBPA|2;
UKB_6152_9_diagnosed_by_doctor_Hayfever_allergic_rhinitis_or_eczema|region543	2	5	IL7R|2;SPEF2|1;PRLR|1;LOC100506406|1;CAPSL|1;
UKB_6152_9_diagnosed_by_doctor_Hayfever_allergic_rhinitis_or_eczema|region75	2	1	IL6R|2;
UKB_6152_9_diagnosed_by_doctor_Hayfever_allergic_rhinitis_or_eczema|region924	2	4	PVT1|2;TMEM75|1;MYC|1;CASC11|1;
Astle_et_al_2016_Eosinophil_counts|region112	1	2	HLX-AS1|1;HLX|1;
Astle_et_al_2016_Eosinophil_counts|region1173	1	5	SENCR|1;LOC101929538|1;KCNJ1|1;FLI1|1;ETS1|1;
Astle_et_al_2016_Eosinophil_counts|region1181	1	1	CCND2|1;
Astle_et_al_2016_Eosinophil_counts|region1244	1	5	FAM109A|1;BRAP|1;ATXN2|1;ALDH2|1;ACAD10|1;
Astle_et_al_2016_Eosinophil_counts|region1251	1	17	XLOC_009911|1;UNC119B|1;SRSF9|1;SPPL3|1;POP5|1;P2RX7|1;P2RX4|1;ORAI1|1;OASL|1;MLEC|1;HNF1A-AS1|1;COX6A1|1;CIT|1;CAMKK2|1;C12orf43|1;BICDL1|1;ACADS|1;
Astle_et_al_2016_Eosinophil_counts|region1274	1	1	COG6|1;
Astle_et_al_2016_Eosinophil_counts|region1331	1	20	SRP54|1;SPTSSA|1;SNX6|1;SLC25A21|1;RALGAPA1P1|1;RALGAPA1|1;PSMA6|1;PPP2R3C|1;NFKBIA|1;MBIP|1;LOC101927178|1;LINC00609|1;KIAA0391|1;INSM2|1;FAM177A1|1;EGLN3|1;EAPP|1;CFL2|1;BRMS1L|1;BAZ1A|1;
Astle_et_al_2016_Eosinophil_counts|region1355	1	1	BATF|1;
Astle_et_al_2016_Eosinophil_counts|region137	1	2	LINC00299|1;ID2|1;
Astle_et_al_2016_Eosinophil_counts|region1375	1	2	LOC105378183|1;EIF5|1;
Astle_et_al_2016_Eosinophil_counts|region1438	1	11	SOCS1|1;SNX29|1;RSL1D1|1;RMI2|1;LOC105371083|1;LITAF|1;EMP2|1;DEXI|1;CLEC16A|1;CIITA|1;ATF7IP2|1;
Astle_et_al_2016_Eosinophil_counts|region1477	1	1	IRF8|1;
Astle_et_al_2016_Eosinophil_counts|region1488	1	92	YBX2|1;XAF1|1;WRAP53|1;VAMP2|1;USP43|1;TXNDC17|1;TRAPPC1|1;TP53|1;TNK1|1;TNFSF13|1;TNFSF12-TNFSF13|1;TNFSF12|1;TMEM88|1;TMEM256-PLSCR3|1;TMEM256|1;TMEM107|1;TMEM102|1;TEKT1|1;STX8|1;SOX15|1;SLC2A4|1;SLC25A35|1;SLC16A13|1;SLC16A11|1;SHBG|1;SENP3-EIF4A1|1;SENP3|1;SAT2|1;RPL26|1;RNF222|1;RNASEK-C17orf49|1;RNASEK|1;RANGRF|1;PLSCR3|1;PITPNM3|1;PIMREG|1;PIK3R6|1;PIK3R5|1;PHF23|1;PFAS|1;PER1|1;ODF4|1;NT…
Astle_et_al_2016_Eosinophil_counts|region173	1	18	VPS54|1;SPRED2|1;SLC1A4|1;SERTAD2|1;RAB1A|1;PELI1|1;MEIS1-AS3|1;MEIS1|1;MDH1|1;LOC339807|1;LOC101927402|1;LOC100507006|1;LINC02245|1;LINC01798|1;LGALSL|1;CEP68|1;AFTPH|1;ACTR2|1;
Astle_et_al_2016_Eosinophil_counts|region188	1	3	TMEM127|1;SNRNP200|1;CIAO1|1;
Astle_et_al_2016_Eosinophil_counts|region283	1	3	TATDN2|1;IRAK2|1;GHRLOS|1;
Astle_et_al_2016_Eosinophil_counts|region344	1	2	RP11-90K6.1|1;CD200|1;
Astle_et_al_2016_Eosinophil_counts|region379	1	3	TERC|1;MYNN|1;ACTRT3|1;
Astle_et_al_2016_Eosinophil_counts|region718	1	4	SLC2A12|1;MYB|1;HMGA1P7|1;HBS1L|1;
Astle_et_al_2016_Eosinophil_counts|region810	1	9	ZNF277|1;TMEM168|1;LSMEM1|1;LINC00998|1;IFRD1|1;HRAT17|1;GPR85|1;DOCK4|1;BMT2|1;
Astle_et_al_2016_Eosinophil_counts|region864	1	2	XPO7|1;EGR3|1;
Astle_et_al_2016_Eosinophil_counts|region99	1	2	LINC01222|1;LINC01221|1;
Astle_et_al_2016_Granulocyte_count|region1004	1	1	ABO|1;
Astle_et_al_2016_Granulocyte_count|region1160	1	1	ZBTB16|1;
Astle_et_al_2016_Granulocyte_count|region1173	1	9	SENCR|1;LOC399975|1;LOC101929517|1;KCNJ5|1;KCNJ1|1;FLI1|1;ETS1|1;C11orf45|1;BARX2|1;
Astle_et_al_2016_Granulocyte_count|region1209	1	3	ANKRD33|1;ACVRL1|1;ACVR1B|1;
Astle_et_al_2016_Granulocyte_count|region1244	1	5	FAM109A|1;BRAP|1;ATXN2|1;ALDH2|1;ACAD10|1;
Astle_et_al_2016_Granulocyte_count|region131	1	2	OR2B11|1;NLRP3|1;
Astle_et_al_2016_Granulocyte_count|region1367	1	1	RIN3|1;
Astle_et_al_2016_Granulocyte_count|region1476	1	6	USP10|1;TLDC1|1;TAF1C|1;KLHL36|1;CRISPLD2|1;COTL1|1;
Astle_et_al_2016_Granulocyte_count|region1488	1	92	YBX2|1;XAF1|1;WRAP53|1;VAMP2|1;USP43|1;TXNDC17|1;TRAPPC1|1;TP53|1;TNK1|1;TNFSF13|1;TNFSF12-TNFSF13|1;TNFSF12|1;TMEM88|1;TMEM256-PLSCR3|1;TMEM256|1;TMEM107|1;TMEM102|1;TEKT1|1;STX8|1;SOX15|1;SLC2A4|1;SLC25A35|1;SLC16A13|1;SLC16A11|1;SHBG|1;SENP3-EIF4A1|1;SENP3|1;SAT2|1;RPL26|1;RNF222|1;RNASEK-C17orf49|1;RNASEK|1;RANGRF|1;PLSCR3|1;PITPNM3|1;PIMREG|1;PIK3R6|1;PIK3R5|1;PHF23|1;PFAS|1;PER1|1;ODF4|1;NT…
Astle_et_al_2016_Granulocyte_count|region1503	1	1	ARHGAP23|1;
Astle_et_al_2016_Granulocyte_count|region1506	1	114	WNK4|1;VPS25|1;VAT1|1;UBTF|1;TUBG2|1;TUBG1|1;TTC25|1;TMUB2|1;TMEM106A|1;TMEM101|1;STAT5B|1;STAT5A|1;STAT3|1;SOST|1;SLC25A39|1;RUNDC3A-AS1|1;RUNDC3A|1;RUNDC1|1;RPL27|1;RND2|1;RAMP2-AS1|1;RAMP2|1;RAB5C|1;PYY|1;PTRF|1;PTGES3L-AARSD1|1;PTGES3L|1;PSME3|1;PSMC3IP|1;PLEKHH3|1;P3H4|1;NT5C3B|1;NKIRAS2|1;NBR2|1;NBR1|1;NAGS|1;NAGLU|1;MPP3|1;MPP2|1;MLX|1;MEOX1|1;LSM12|1;LOC108783654|1;LOC105371789|1;LOC10192…
Astle_et_al_2016_Granulocyte_count|region1508	1	14	RP11-707O23.1|1;RP11-259G18.3|1;MAPT-IT1|1;MAPT-AS1|1;MAPT|1;MAPK8IP1P2|1;MAPK8IP1P1|1;LRRC37A4P|1;LRRC37A2|1;LRRC37A|1;LINC02210|1;KANSL1-AS1|1;DND1P1|1;ADAM11|1;
Astle_et_al_2016_Granulocyte_count|region1556	1	1	MAPK4|1;
Astle_et_al_2016_Granulocyte_count|region189	1	2	TBC1D8-AS1|1;TBC1D8|1;
Astle_et_al_2016_Granulocyte_count|region436	1	1	KIT|1;
Astle_et_al_2016_Granulocyte_count|region636	1	3	SSR1|1;RREB1|1;CAGE1|1;
Astle_et_al_2016_Granulocyte_count|region654	1	1	HCG26|1;
Astle_et_al_2016_Granulocyte_count|region662	1	1	TRERF1|1;
Astle_et_al_2016_Granulocyte_count|region718	1	1	HBS1L|1;
Astle_et_al_2016_Granulocyte_count|region855	1	1	GATA4|1;
Astle_et_al_2016_Granulocyte_count|region869	1	6	WRN|1;RBPMS-AS1|1;RBPMS|1;PURG|1;PPP2CB|1;DCTN6|1;
Astle_et_al_2016_Granulocyte_count|region925	1	1	GSDMC|1;
Astle_et_al_2016_Granulocyte_count|region940	1	1	JAK2|1;
Astle_et_al_2016_High_light_scatter_reticulocyte_count|region1005	1	1	RXRA|1;
Astle_et_al_2016_High_light_scatter_reticulocyte_count|region1039	1	7	ZNF22|1;ZFAND4|1;WASHC2C|1;MARCH8|1;LOC102724323|1;C10orf25|1;ALOX5|1;
Astle_et_al_2016_High_light_scatter_reticulocyte_count|region1195	1	3	SSPN|1;RP11-612B6.1|1;BHLHE41|1;
Astle_et_al_2016_High_light_scatter_reticulocyte_count|region1212	1	1	HSD17B6|1;
Astle_et_al_2016_High_light_scatter_reticulocyte_count|region1251	1	1	POP5|1;
Astle_et_al_2016_High_light_scatter_reticulocyte_count|region1277	1	2	NUFIP1|1;GPALPP1|1;
Astle_et_al_2016_High_light_scatter_reticulocyte_count|region137	1	1	LINC01814|1;
Astle_et_al_2016_High_light_scatter_reticulocyte_count|region1405	1	1	MGC15885|1;
Astle_et_al_2016_High_light_scatter_reticulocyte_count|region146	1	1	EFR3B|1;
Astle_et_al_2016_High_light_scatter_reticulocyte_count|region147	1	2	GCKR|1;FNDC4|1;
Astle_et_al_2016_High_light_scatter_reticulocyte_count|region1497	1	1	SPECC1|1;
Astle_et_al_2016_High_light_scatter_reticulocyte_count|region150	1	2	EHD3|1;CAPN14|1;
Astle_et_al_2016_High_light_scatter_reticulocyte_count|region1610	1	11	TULP2|1;PPP1R15A|1;PLEKHA4|1;NUCB1-AS1|1;NUCB1|1;HSD17B14|1;FTL|1;FLT3LG|1;DHDH|1;BCAT2|1;BAX|1;
Astle_et_al_2016_High_light_scatter_reticulocyte_count|region1618	1	1	SIGLEC1|1;
Astle_et_al_2016_High_light_scatter_reticulocyte_count|region1634	1	5	NOL4L|1;LOC149950|1;LOC101929698|1;DNMT3B|1;C20orf203|1;
Astle_et_al_2016_High_light_scatter_reticulocyte_count|region185	1	2	RNF103|1;CD8A|1;
Astle_et_al_2016_High_light_scatter_reticulocyte_count|region495	1	1	KIAA0922|1;
Astle_et_al_2016_High_light_scatter_reticulocyte_count|region718	1	1	HBS1L|1;
Astle_et_al_2016_High_light_scatter_reticulocyte_count|region721	1	1	LINC01625|1;
Astle_et_al_2016_High_light_scatter_reticulocyte_count|region76	1	2	PKLR|1;CLK2|1;
Astle_et_al_2016_High_light_scatter_reticulocyte_count|region823	1	12	WDR91|1;TMEM140|1;SLC35B4|1;NUP205|1;LRGUK|1;CNOT4|1;CALD1|1;C7orf73|1;C7orf49|1;BPGM|1;AKR1B1|1;AGBL3|1;
Astle_et_al_2016_High_light_scatter_reticulocyte_count|region851	1	2	PPP1R3B|1;LOC101929128|1;
Astle_et_al_2016_High_light_scatter_reticulocyte_count|region866	1	2	SDAD1P1|1;BNIP3L|1;
Astle_et_al_2016_High_light_scatter_reticulocyte_count|region893	1	1	TRPA1|1;
Astle_et_al_2016_High_light_scatter_reticulocyte_count|region918	1	2	TRPS1|1;LOC105375713|1;
Astle_et_al_2016_High_light_scatter_reticulocyte_count|region939	1	8	RLN1|1;RCL1|1;PLPP6|1;PLGRKT|1;JAK2|1;CDC37L1-AS1|1;CDC37L1|1;AK3|1;
Astle_et_al_2016_High_light_scatter_reticulocyte_count|region979	1	2	S1PR3|1;C9orf47|1;
Astle_et_al_2016_High_light_scatter_reticulocyte_count|region99	1	2	LINC01222|1;LINC01221|1;
Astle_et_al_2016_Lymphocyte_counts|region1244	1	5	FAM109A|1;BRAP|1;ATXN2|1;ALDH2|1;ACAD10|1;
Astle_et_al_2016_Lymphocyte_counts|region1275	1	23	WBP4|1;VWA8-AS1|1;VWA8|1;TPTE2P5|1;TNFSF11|1;SUGT1P3|1;SLC25A15|1;PROSER1|1;NHLRC3|1;NAA16|1;MTRF1|1;MRPS31|1;LOC101929140|1;LINC00598|1;LINC00548|1;LINC00332|1;LHFP|1;KBTBD7|1;KBTBD6|1;FOXO1|1;ELF1|1;COG6|1;AKAP11|1;
Astle_et_al_2016_Lymphocyte_counts|region1277	1	2	NUFIP1|1;GPALPP1|1;
Astle_et_al_2016_Lymphocyte_counts|region1375	1	13	ZNF839|1;TRMT61A|1;TRAF3|1;TECPR2|1;RNU6-1316P|1;RCOR1|1;LINC00677|1;EXOC3L4|1;CINP|1;CDC42BPB|1;C14orf2|1;ANKRD9|1;AMN|1;
Astle_et_al_2016_Lymphocyte_counts|region1438	1	12	SOCS1|1;SNX29|1;SNN|1;RSL1D1|1;RMI2|1;LOC105371083|1;LITAF|1;GSPT1|1;DEXI|1;CLEC16A|1;CIITA|1;ATF7IP2|1;
Astle_et_al_2016_Lymphocyte_counts|region145	1	8	WDCP|1;UBXN2A|1;TP53I3|1;SF3B6|1;MFSD2B|1;FKBP1B|1;FAM228B|1;ATAD2B|1;
Astle_et_al_2016_Lymphocyte_counts|region146	1	2	POMC|1;LINC01381|1;
Astle_et_al_2016_Lymphocyte_counts|region1476	1	6	USP10|1;TLDC1|1;TAF1C|1;KLHL36|1;CRISPLD2|1;COTL1|1;
Astle_et_al_2016_Lymphocyte_counts|region1486	1	61	ZZEF1|1;ZNF594|1;ZNF232|1;ZMYND15|1;ZFP3|1;WSCD1|1;UBE2G1|1;TRPV3|1;TAX1BP3|1;SPNS3|1;SPNS2|1;SPAG7|1;SMTNL2|1;SLC25A11|1;SHPK|1;RPAIN|1;RNF167|1;RABEP1|1;PSMB6|1;PLD2|1;PFN1|1;PELP1|1;P2RX5-TAX1BP3|1;P2RX5|1;NUP88|1;NLRP1|1;NCBP3|1;MYBBP1A|1;MIS12|1;MINK1|1;MED11|1;LOC105371506|1;LOC103021295|1;LOC102724009|1;LOC101928000|1;LOC101559451|1;LOC100130950|1;LINC01996|1;KIF1C|1;ITGAE|1;INCA1|1;GSG2|1…
Astle_et_al_2016_Lymphocyte_counts|region15	1	3	LOC101928163|1;E2F2|1;ASAP3|1;
Astle_et_al_2016_Lymphocyte_counts|region1609	1	4	SAE1|1;INAFM1|1;CCDC9|1;BBC3|1;
Astle_et_al_2016_Lymphocyte_counts|region250	1	2	CASP8|1;ALS2CR12|1;
Astle_et_al_2016_Lymphocyte_counts|region284	1	10	TSEN2|1;TIMP4|1;TAMM41|1;SYN2|1;RPL32|1;PPARG|1;MKRN2OS|1;MKRN2|1;CAND2|1;ATG7|1;
Astle_et_al_2016_Lymphocyte_counts|region314	1	1	IL17RD|1;
Astle_et_al_2016_Lymphocyte_counts|region351	1	1	ADCY5|1;
Astle_et_al_2016_Lymphocyte_counts|region468	1	1	EGF|1;
Astle_et_al_2016_Lymphocyte_counts|region595	1	9	ZNF608|1;TEX43|1;PHAX|1;LOC101927421|1;LINC01170|1;GRAMD3|1;CSNK1G3|1;CEP120|1;ALDH7A1|1;
Astle_et_al_2016_Lymphocyte_counts|region661	1	4	TAF8|1;RP11-298J23.10|1;MED20|1;CCND3|1;
Astle_et_al_2016_Lymphocyte_counts|region718	1	1	HBS1L|1;
Astle_et_al_2016_Lymphocyte_counts|region761	1	5	LOC541472|1;LOC401312|1;LOC100506178|1;IL6|1;AC073072.5|1;
Astle_et_al_2016_Lymphocyte_counts|region909	1	16	ZNF706|1;UBR5-AS1|1;UBR5|1;SPAG1|1;RRM2B|1;RNF19A|1;POLR2K|1;NCALD|1;NACAP1|1;GRHL2|1;FZD6|1;FLJ42969|1;FBXO43|1;CTHRC1|1;COX6C|1;ANKRD46|1;
Astle_et_al_2016_Lymphocyte_counts|region925	1	4	GSDMC|1;FAM49B|1;ASAP1-IT2|1;ASAP1|1;
Astle_et_al_2016_Monocyte_count|region1173	1	3	LOC101929538|1;LOC101929517|1;ETS1|1;
Astle_et_al_2016_Monocyte_count|region1181	1	1	CCND2|1;
Astle_et_al_2016_Monocyte_count|region1209	1	3	ANKRD33|1;ACVRL1|1;ACVR1B|1;
Astle_et_al_2016_Monocyte_count|region121	1	32	TOMM20|1;TBCE|1;TARBP1|1;SLC35F3|1;RBM34|1;PCNX2|1;NTPCR|1;NID1|1;MIR5096|1;MAP3K21|1;MAP10|1;LYST|1;LOC101927851|1;LOC101927787|1;LOC101927765|1;LINC01354|1;LINC01132|1;LINC00184|1;LGALS8-AS1|1;LGALS8|1;KCNK1|1;IRF2BP2|1;HEATR1|1;GPR137B|1;GNG4|1;GGPS1|1;ERO1B|1;EDARADD|1;COA6|1;B3GALNT2|1;ARID4B|1;ACTN2|1;
Astle_et_al_2016_Monocyte_count|region1244	1	5	FAM109A|1;BRAP|1;ATXN2|1;ALDH2|1;ACAD10|1;
Astle_et_al_2016_Monocyte_count|region1476	1	6	USP10|1;TLDC1|1;TAF1C|1;KLHL36|1;CRISPLD2|1;COTL1|1;
Astle_et_al_2016_Monocyte_count|region1498	1	1	KSR1|1;
Astle_et_al_2016_Monocyte_count|region1504	1	2	MED24|1;GSDMA|1;
Astle_et_al_2016_Monocyte_count|region1634	1	3	NOL4L|1;LOC149950|1;C20orf203|1;
Astle_et_al_2016_Monocyte_count|region173	1	18	VPS54|1;SPRED2|1;SLC1A4|1;SERTAD2|1;RAB1A|1;PELI1|1;MEIS1-AS3|1;MEIS1|1;MDH1|1;LOC339807|1;LOC101927402|1;LOC100507006|1;LINC02245|1;LINC01798|1;LGALSL|1;CEP68|1;AFTPH|1;ACTR2|1;
Astle_et_al_2016_Monocyte_count|region190	1	2	RFX8|1;MAP4K4|1;
Astle_et_al_2016_Monocyte_count|region197	1	7	NPHP1|1;MIR4435-2HG|1;MALL|1;BUB1|1;BCL2L11|1;ACOXL-AS1|1;ACOXL|1;
Astle_et_al_2016_Monocyte_count|region211	1	6	UBXN4|1;MCM6|1;LOC100507600|1;DARS-AS1|1;DARS|1;CXCR4|1;
Astle_et_al_2016_Monocyte_count|region284	1	10	TSEN2|1;TIMP4|1;TAMM41|1;SYN2|1;RPL32|1;PPARG|1;MKRN2OS|1;MKRN2|1;CAND2|1;ATG7|1;
Astle_et_al_2016_Monocyte_count|region351	1	1	ADCY5|1;
Astle_et_al_2016_Monocyte_count|region61	1	1	LINC01349|1;
Astle_et_al_2016_Monocyte_count|region700	1	1	BEND3|1;
Astle_et_al_2016_Monocyte_count|region71	1	3	TENT5C|1;LOC100996263|1;FAM46C|1;
Astle_et_al_2016_Monocyte_count|region718	1	4	SLC2A12|1;MYB|1;HMGA1P7|1;HBS1L|1;
Astle_et_al_2016_Monocyte_count|region92	1	16	TSEN15|1;TRMT1L|1;TPR|1;SWT1|1;RNF2|1;PTGS2|1;PRG4|1;PLA2G4A|1;PACERR|1;LINC01036|1;IVNS1ABP|1;HMCN1|1;FAM129A|1;EDEM3|1;C1orf27|1;C1orf21|1;
Astle_et_al_2016_Myeloid_white_cell_count|region1004	1	1	ABO|1;
Astle_et_al_2016_Myeloid_white_cell_count|region1173	1	3	LOC101929538|1;LOC101929517|1;ETS1|1;
Astle_et_al_2016_Myeloid_white_cell_count|region1209	1	3	ANKRD33|1;ACVRL1|1;ACVR1B|1;
Astle_et_al_2016_Myeloid_white_cell_count|region1244	1	5	FAM109A|1;BRAP|1;ATXN2|1;ALDH2|1;ACAD10|1;
Astle_et_al_2016_Myeloid_white_cell_count|region131	1	2	OR2B11|1;NLRP3|1;
Astle_et_al_2016_Myeloid_white_cell_count|region1367	1	1	RIN3|1;
Astle_et_al_2016_Myeloid_white_cell_count|region1476	1	6	USP10|1;TLDC1|1;TAF1C|1;KLHL36|1;CRISPLD2|1;COTL1|1;
Astle_et_al_2016_Myeloid_white_cell_count|region1486	1	1	RABEP1|1;
Astle_et_al_2016_Myeloid_white_cell_count|region1503	1	1	ARHGAP23|1;
Astle_et_al_2016_Myeloid_white_cell_count|region1508	1	14	RP11-707O23.1|1;RP11-259G18.3|1;MAPT-IT1|1;MAPT-AS1|1;MAPT|1;MAPK8IP1P2|1;MAPK8IP1P1|1;LRRC37A4P|1;LRRC37A2|1;LRRC37A|1;LINC02210|1;KANSL1-AS1|1;DND1P1|1;ADAM11|1;
Astle_et_al_2016_Myeloid_white_cell_count|region1556	1	1	MAPK4|1;
Astle_et_al_2016_Myeloid_white_cell_count|region1585	1	1	ICAM5|1;
Astle_et_al_2016_Myeloid_white_cell_count|region1686	1	1	EMID1|1;
Astle_et_al_2016_Myeloid_white_cell_count|region189	1	2	TBC1D8-AS1|1;TBC1D8|1;
Astle_et_al_2016_Myeloid_white_cell_count|region436	1	1	KIT|1;
Astle_et_al_2016_Myeloid_white_cell_count|region475	1	1	PDE5A|1;
Astle_et_al_2016_Myeloid_white_cell_count|region636	1	3	SSR1|1;RREB1|1;CAGE1|1;
Astle_et_al_2016_Myeloid_white_cell_count|region654	1	1	HCG26|1;
Astle_et_al_2016_Myeloid_white_cell_count|region718	1	1	HBS1L|1;
Astle_et_al_2016_Myeloid_white_cell_count|region855	1	1	GATA4|1;
Astle_et_al_2016_Myeloid_white_cell_count|region869	1	6	WRN|1;RBPMS-AS1|1;RBPMS|1;PURG|1;PPP2CB|1;DCTN6|1;
Astle_et_al_2016_Myeloid_white_cell_count|region925	1	1	GSDMC|1;
Astle_et_al_2016_Neutrophil_count|region1004	1	1	ABO|1;
Astle_et_al_2016_Neutrophil_count|region1160	1	1	ZBTB16|1;
Astle_et_al_2016_Neutrophil_count|region1209	1	3	ANKRD33|1;ACVRL1|1;ACVR1B|1;
Astle_et_al_2016_Neutrophil_count|region1244	1	5	FAM109A|1;BRAP|1;ATXN2|1;ALDH2|1;ACAD10|1;
Astle_et_al_2016_Neutrophil_count|region131	1	2	OR2B11|1;NLRP3|1;
Astle_et_al_2016_Neutrophil_count|region1367	1	1	RIN3|1;
Astle_et_al_2016_Neutrophil_count|region1476	1	6	USP10|1;TLDC1|1;TAF1C|1;KLHL36|1;CRISPLD2|1;COTL1|1;
Astle_et_al_2016_Neutrophil_count|region1503	1	2	SOCS7|1;ARHGAP23|1;
Astle_et_al_2016_Neutrophil_count|region1556	1	1	MAPK4|1;
Astle_et_al_2016_Neutrophil_count|region1591	1	5	SSBP4|1;PGPEP1|1;LRRC25|1;GDF15|1;ELL|1;
Astle_et_al_2016_Neutrophil_count|region189	1	2	TBC1D8-AS1|1;TBC1D8|1;
Astle_et_al_2016_Neutrophil_count|region436	1	1	KIT|1;
Astle_et_al_2016_Neutrophil_count|region611	1	1	HAVCR1|1;
Astle_et_al_2016_Neutrophil_count|region654	1	1	HCG26|1;
Astle_et_al_2016_Neutrophil_count|region855	1	1	GATA4|1;
Astle_et_al_2016_Neutrophil_count|region869	1	6	WRN|1;RBPMS-AS1|1;RBPMS|1;PURG|1;PPP2CB|1;DCTN6|1;
Astle_et_al_2016_Neutrophil_count|region925	1	1	GSDMC|1;
Astle_et_al_2016_Platelet_count|region1	1	58	WRAP73|1;VWA1|1;TPRG1L|1;TP73-AS1|1;TNFRSF18|1;TNFRSF14|1;TMEM52|1;TMEM240|1;TAS1R3|1;SSU72|1;SMIM1|1;SLC35E2B|1;SKI|1;SDF4|1;SAMD11|1;RNF223|1;RER1|1;PRKCZ|1;PRDM16|1;PLEKHN1|1;PLCH2|1;PEX10|1;PANK4|1;NOC2L|1;NADK|1;MORN1|1;MIB2|1;LRRC47|1;LOC115110|1;LOC105378591|1;LOC100288069|1;LOC100129534|1;LINC01134|1;LINC01128|1;LINC00115|1;KLHL17|1;ISG15|1;INTS11|1;HES5|1;HES4|1;GNB1|1;GABRD|1;FNDC10|1;F…
Astle_et_al_2016_Platelet_count|region1040	1	1	VSTM4|1;
Astle_et_al_2016_Platelet_count|region1059	1	3	ZCCHC24|1;RP11-342M3.5|1;PPIF|1;
Astle_et_al_2016_Platelet_count|region1100	1	33	ZNF215|1;ZNF214|1;TUB-AS1|1;TUB|1;TRIM66|1;TMEM9B-AS1|1;TMEM9B|1;TMEM41B|1;SYT9|1;SWAP70|1;STK33|1;ST5|1;SCUBE2|1;SBF2-AS1|1;SBF2|1;RPL27A|1;RP11-318C2.1|1;RIC3|1;PPFIBP2|1;OLFML1|1;NRIP3|1;NLRP14|1;LYVE1|1;LOC440028|1;LOC283299|1;LOC102724784|1;LMO1|1;IPO7|1;EIF3F|1;DENND5A|1;CYB5R2|1;C11orf16|1;AKIP1|1;
Astle_et_al_2016_Platelet_count|region1196	1	3	OVCH1-AS1|1;LOC100506606|1;ERGIC2|1;
Astle_et_al_2016_Platelet_count|region1210	1	2	HOXC11|1;HOTAIR|1;
Astle_et_al_2016_Platelet_count|region1251	1	20	XLOC_009911|1;UNC119B|1;TRIAP1|1;SRSF9|1;SPPL3|1;POP5|1;P2RX7|1;P2RX4|1;OASL|1;NRAV|1;MLEC|1;HNF1A-AS1|1;HNF1A|1;GATC|1;DYNLL1|1;COX6A1|1;COQ5|1;CAMKK2|1;C12orf43|1;ACADS|1;
Astle_et_al_2016_Platelet_count|region1318	1	4	TNFSF13B|1;LINC00399|1;LINC00396|1;IRS2|1;
Astle_et_al_2016_Platelet_count|region1353	1	2	TMEM229B|1;PLEKHH1|1;
Astle_et_al_2016_Platelet_count|region1480	1	25	ZNF778|1;ZFPM1|1;ZC3H18|1;TRAPPC2L|1;SNAI3-AS1|1;SNAI3|1;SLC7A5|1;RNF166|1;PIEZO1|1;MVD|1;LOC102724467|1;LOC100287036|1;LOC100129697|1;LINC02182|1;KLHDC4|1;IL17C|1;GAS8|1;GALNS|1;DBNDD1|1;CYBA|1;CTU2|1;CDH15|1;BANP|1;APRT|1;ACSF3|1;
Astle_et_al_2016_Platelet_count|region1507	1	1	FAM171A2|1;
Astle_et_al_2016_Platelet_count|region154	1	1	LINC00211|1;
Astle_et_al_2016_Platelet_count|region1540	1	2	GATA6-AS1|1;GATA6|1;
Astle_et_al_2016_Platelet_count|region1607	1	2	MARK4|1;EXOC3L2|1;
Astle_et_al_2016_Platelet_count|region1695	1	1	PACSIN2|1;
Astle_et_al_2016_Platelet_count|region284	1	10	TSEN2|1;TIMP4|1;TAMM41|1;SYN2|1;RPL32|1;PPARG|1;MKRN2OS|1;MKRN2|1;CAND2|1;ATG7|1;
Astle_et_al_2016_Platelet_count|region314	1	1	IL17RD|1;
Astle_et_al_2016_Platelet_count|region385	1	2	ZNF639|1;ZMAT3|1;
Astle_et_al_2016_Platelet_count|region611	1	1	HAVCR1|1;
Astle_et_al_2016_Platelet_count|region612	1	1	RNF145|1;
Astle_et_al_2016_Platelet_count|region665	1	1	ADGRF2|1;
Astle_et_al_2016_Platelet_count|region767	1	1	LOC100506725|1;
Astle_et_al_2016_Platelet_count|region807	1	1	CCDC71L|1;
Astle_et_al_2016_Platelet_count|region962	1	8	TRMT10B|1;SLC25A51|1;SHB|1;FBXO10|1;FAM201A|1;EXOSC3|1;ANKRD18A|1;ALDH1B1|1;
Astle_et_al_2016_Platelet_count|region99	1	2	LINC01222|1;LINC01221|1;
Astle_et_al_2016_Red_blood_cell_count|region10	1	39	ZBTB17|1;TMEM51-AS1|1;TMEM51|1;SZRD1|1;SPEN|1;SLC25A34|1;SDHB|1;RSG1|1;RSC1A1|1;RPS16P1|1;RCC2|1;PLEKHM2|1;PADI4|1;PADI2|1;PADI1|1;NECAP2|1;NBPF1|1;MST1P2|1;LOC105376805|1;LINC01783|1;HSPB7|1;FLJ37453|1;FHAD1|1;FBXO42|1;FBLIM1|1;FAM131C|1;ESPNP|1;EPHA2|1;DNAJC16|1;DDI2|1;CTRC|1;CROCCP2|1;CROCC|1;CLCNKB|1;CLCNKA|1;CASP9|1;C1orf195|1;ATP13A2|1;AGMAT|1;
Astle_et_al_2016_Red_blood_cell_count|region1000	1	3	LOC102723566|1;FPGS|1;ENG|1;
Astle_et_al_2016_Red_blood_cell_count|region1004	1	1	ABO|1;
Astle_et_al_2016_Red_blood_cell_count|region1181	1	1	CCND2|1;
Astle_et_al_2016_Red_blood_cell_count|region1244	1	5	FAM109A|1;BRAP|1;ATXN2|1;ALDH2|1;ACAD10|1;
Astle_et_al_2016_Red_blood_cell_count|region1259	1	26	ZNF891|1;ZNF268|1;ZNF26|1;ZNF10|1;ULK1|1;STX2|1;SFSWAP|1;RAN|1;PXMP2|1;PUS1|1;POLE|1;PGAM5|1;NOC4L|1;MMP17|1;LRCOL1|1;LOC101928530|1;LOC100130238|1;LACAT8|1;GOLGA3|1;FBRSL1|1;EP400P1|1;EP400NL|1;EP400|1;DDX51|1;CHFR|1;ANKLE2|1;
Astle_et_al_2016_Red_blood_cell_count|region1412	1	1	FBXO22|1;
Astle_et_al_2016_Red_blood_cell_count|region1504	1	1	NEUROD2|1;
Astle_et_al_2016_Red_blood_cell_count|region1555	1	3	SMAD7|1;DYM|1;CTIF|1;
Astle_et_al_2016_Red_blood_cell_count|region1655	1	3	USP25|1;RBM11|1;NRIP1|1;
Astle_et_al_2016_Red_blood_cell_count|region1670	1	1	SIM2|1;
Astle_et_al_2016_Red_blood_cell_count|region237	1	3	HOXD9|1;HOXD8|1;HOXD10|1;
Astle_et_al_2016_Red_blood_cell_count|region244	1	15	WDR75|1;SLC40A1|1;PMS1|1;OSGEPL1-AS1|1;OSGEPL1|1;ORMDL1|1;NEMP2|1;MFSD6|1;HIBCH|1;GULP1|1;COL5A2|1;COL3A1|1;C2orf88|1;ASNSD1|1;ANKAR|1;
Astle_et_al_2016_Red_blood_cell_count|region260	1	1	VIL1|1;
Astle_et_al_2016_Red_blood_cell_count|region721	1	1	LINC01625|1;
Astle_et_al_2016_Red_blood_cell_count|region736	1	1	C6orf118|1;
Astle_et_al_2016_Red_blood_cell_count|region742	1	2	PRKAR1B|1;HRAT92|1;
Astle_et_al_2016_Red_blood_cell_count|region863	1	1	REEP4|1;
Astle_et_al_2016_Red_blood_cell_count|region864	1	6	TNFRSF10A|1;SLC25A37|1;NKX3-1|1;NKX2-6|1;LOC389641|1;ENTPD4|1;
Astle_et_al_2016_Red_blood_cell_count|region877	1	2	SMIM19|1;SLC20A2|1;
Astle_et_al_2016_Red_blood_cell_count|region939	1	8	RLN1|1;RCL1|1;PLPP6|1;PLGRKT|1;JAK2|1;CDC37L1-AS1|1;CDC37L1|1;AK3|1;
Astle_et_al_2016_Reticulocyte_count|region1005	1	1	RXRA|1;
Astle_et_al_2016_Reticulocyte_count|region1039	1	7	ZNF22|1;ZFAND4|1;WASHC2C|1;MARCH8|1;LOC102724323|1;C10orf25|1;ALOX5|1;
Astle_et_al_2016_Reticulocyte_count|region1195	1	3	SSPN|1;RP11-612B6.1|1;BHLHE41|1;
Astle_et_al_2016_Reticulocyte_count|region1231	1	1	ATP2B1|1;
Astle_et_al_2016_Reticulocyte_count|region137	1	1	LINC01814|1;
Astle_et_al_2016_Reticulocyte_count|region1405	1	1	MGC15885|1;
Astle_et_al_2016_Reticulocyte_count|region147	1	2	GCKR|1;FNDC4|1;
Astle_et_al_2016_Reticulocyte_count|region1497	1	1	SPECC1|1;
Astle_et_al_2016_Reticulocyte_count|region1498	1	7	TRAF4|1;TLCD1|1;RPL23A|1;RAB34|1;PROCA1|1;NEK8|1;AC010761.8|1;
Astle_et_al_2016_Reticulocyte_count|region1507	1	3	SLC25A39|1;RUNDC3A|1;ASB16-AS1|1;
Astle_et_al_2016_Reticulocyte_count|region1524	1	4	UBE2O|1;SPHK1|1;PRPSAP1|1;EXOC7|1;
Astle_et_al_2016_Reticulocyte_count|region1618	1	1	SIGLEC1|1;
Astle_et_al_2016_Reticulocyte_count|region185	1	2	RNF103|1;CD8A|1;
Astle_et_al_2016_Reticulocyte_count|region495	1	1	KIAA0922|1;
Astle_et_al_2016_Reticulocyte_count|region652	1	3	OR2H2|1;HLA-H|1;GABBR1|1;
Astle_et_al_2016_Reticulocyte_count|region721	1	1	LINC01625|1;
Astle_et_al_2016_Reticulocyte_count|region76	1	2	PKLR|1;CLK2|1;
Astle_et_al_2016_Reticulocyte_count|region851	1	2	PPP1R3B|1;LOC101929128|1;
Astle_et_al_2016_Reticulocyte_count|region918	1	2	TRPS1|1;LOC105375713|1;
Astle_et_al_2016_Reticulocyte_count|region979	1	2	S1PR3|1;C9orf47|1;
Astle_et_al_2016_Reticulocyte_count|region99	1	2	LINC01222|1;LINC01221|1;
Astle_et_al_2016_Sum_basophil_neutrophil_counts|region1004	1	1	ABO|1;
Astle_et_al_2016_Sum_basophil_neutrophil_counts|region1160	1	1	ZBTB16|1;
Astle_et_al_2016_Sum_basophil_neutrophil_counts|region1173	1	3	LOC101929538|1;LOC101929517|1;ETS1|1;
Astle_et_al_2016_Sum_basophil_neutrophil_counts|region1209	1	3	ANKRD33|1;ACVRL1|1;ACVR1B|1;
Astle_et_al_2016_Sum_basophil_neutrophil_counts|region1244	1	5	FAM109A|1;BRAP|1;ATXN2|1;ALDH2|1;ACAD10|1;
Astle_et_al_2016_Sum_basophil_neutrophil_counts|region131	1	2	OR2B11|1;NLRP3|1;
Astle_et_al_2016_Sum_basophil_neutrophil_counts|region1367	1	1	RIN3|1;
Astle_et_al_2016_Sum_basophil_neutrophil_counts|region1476	1	6	USP10|1;TLDC1|1;TAF1C|1;KLHL36|1;CRISPLD2|1;COTL1|1;
Astle_et_al_2016_Sum_basophil_neutrophil_counts|region1503	1	2	SOCS7|1;ARHGAP23|1;
Astle_et_al_2016_Sum_basophil_neutrophil_counts|region1556	1	1	MAPK4|1;
Astle_et_al_2016_Sum_basophil_neutrophil_counts|region189	1	2	TBC1D8-AS1|1;TBC1D8|1;
Astle_et_al_2016_Sum_basophil_neutrophil_counts|region436	1	1	KIT|1;
Astle_et_al_2016_Sum_basophil_neutrophil_counts|region611	1	1	HAVCR1|1;
Astle_et_al_2016_Sum_basophil_neutrophil_counts|region654	1	1	HCG26|1;
Astle_et_al_2016_Sum_basophil_neutrophil_counts|region855	1	1	GATA4|1;
Astle_et_al_2016_Sum_basophil_neutrophil_counts|region869	1	6	WRN|1;RBPMS-AS1|1;RBPMS|1;PURG|1;PPP2CB|1;DCTN6|1;
Astle_et_al_2016_Sum_basophil_neutrophil_counts|region925	1	1	GSDMC|1;
Astle_et_al_2016_Sum_eosinophil_basophil_counts|region1074	1	3	SFXN2|1;HPS6|1;ARL3|1;
Astle_et_al_2016_Sum_eosinophil_basophil_counts|region112	1	2	HLX-AS1|1;HLX|1;
Astle_et_al_2016_Sum_eosinophil_basophil_counts|region1173	1	5	SENCR|1;LOC101929538|1;KCNJ1|1;FLI1|1;ETS1|1;
Astle_et_al_2016_Sum_eosinophil_basophil_counts|region1210	1	2	HOXC11|1;HOTAIR|1;
Astle_et_al_2016_Sum_eosinophil_basophil_counts|region1244	1	5	FAM109A|1;BRAP|1;ATXN2|1;ALDH2|1;ACAD10|1;
Astle_et_al_2016_Sum_eosinophil_basophil_counts|region1331	1	20	SRP54|1;SPTSSA|1;SNX6|1;SLC25A21|1;RALGAPA1P1|1;RALGAPA1|1;PSMA6|1;PPP2R3C|1;NFKBIA|1;MBIP|1;LOC101927178|1;LINC00609|1;KIAA0391|1;INSM2|1;FAM177A1|1;EGLN3|1;EAPP|1;CFL2|1;BRMS1L|1;BAZ1A|1;
Astle_et_al_2016_Sum_eosinophil_basophil_counts|region1355	1	1	BATF|1;
Astle_et_al_2016_Sum_eosinophil_basophil_counts|region137	1	2	LINC00299|1;ID2|1;
Astle_et_al_2016_Sum_eosinophil_basophil_counts|region1438	1	11	SOCS1|1;SNX29|1;RSL1D1|1;RMI2|1;LOC105371083|1;LITAF|1;EMP2|1;DEXI|1;CLEC16A|1;CIITA|1;ATF7IP2|1;
Astle_et_al_2016_Sum_eosinophil_basophil_counts|region1477	1	1	IRF8|1;
Astle_et_al_2016_Sum_eosinophil_basophil_counts|region1480	1	2	ZFPM1|1;LOC100128882|1;
Astle_et_al_2016_Sum_eosinophil_basophil_counts|region1488	1	92	YBX2|1;XAF1|1;WRAP53|1;VAMP2|1;USP43|1;TXNDC17|1;TRAPPC1|1;TP53|1;TNK1|1;TNFSF13|1;TNFSF12-TNFSF13|1;TNFSF12|1;TMEM88|1;TMEM256-PLSCR3|1;TMEM256|1;TMEM107|1;TMEM102|1;TEKT1|1;STX8|1;SOX15|1;SLC2A4|1;SLC25A35|1;SLC16A13|1;SLC16A11|1;SHBG|1;SENP3-EIF4A1|1;SENP3|1;SAT2|1;RPL26|1;RNF222|1;RNASEK-C17orf49|1;RNASEK|1;RANGRF|1;PLSCR3|1;PITPNM3|1;PIMREG|1;PIK3R6|1;PIK3R5|1;PHF23|1;PFAS|1;PER1|1;ODF4|1;NT…
Astle_et_al_2016_Sum_eosinophil_basophil_counts|region1504	1	2	MED24|1;GSDMA|1;
Astle_et_al_2016_Sum_eosinophil_basophil_counts|region1591	1	1	TM6SF2|1;
Astle_et_al_2016_Sum_eosinophil_basophil_counts|region257	1	2	SPAG16|1;LOC100130451|1;
Astle_et_al_2016_Sum_eosinophil_basophil_counts|region283	1	3	TATDN2|1;IRAK2|1;GHRLOS|1;
Astle_et_al_2016_Sum_eosinophil_basophil_counts|region284	1	3	TSEN2|1;SYN2|1;PPARG|1;
Astle_et_al_2016_Sum_eosinophil_basophil_counts|region287	1	1	PLCL2|1;
Astle_et_al_2016_Sum_eosinophil_basophil_counts|region344	1	2	RP11-90K6.1|1;CD200|1;
Astle_et_al_2016_Sum_eosinophil_basophil_counts|region379	1	3	TERC|1;MYNN|1;ACTRT3|1;
Astle_et_al_2016_Sum_eosinophil_basophil_counts|region61	1	12	VCAM1|1;TRMT13|1;SLC30A7|1;SASS6|1;S1PR1|1;LRRC39|1;LOC102606465|1;LOC101928370|1;EXTL2|1;DPH5|1;DNAJA1P5|1;DBT|1;
Astle_et_al_2016_Sum_eosinophil_basophil_counts|region810	1	9	ZNF277|1;TMEM168|1;LSMEM1|1;LINC00998|1;IFRD1|1;HRAT17|1;GPR85|1;DOCK4|1;BMT2|1;
Astle_et_al_2016_Sum_eosinophil_basophil_counts|region864	1	2	XPO7|1;EGR3|1;
Astle_et_al_2016_Sum_eosinophil_basophil_counts|region99	1	2	LINC01222|1;LINC01221|1;
Astle_et_al_2016_Sum_neutrophil_eosinophil_counts|region1004	1	1	ABO|1;
Astle_et_al_2016_Sum_neutrophil_eosinophil_counts|region1160	1	1	ZBTB16|1;
Astle_et_al_2016_Sum_neutrophil_eosinophil_counts|region1173	1	9	SENCR|1;LOC399975|1;LOC101929517|1;KCNJ5|1;KCNJ1|1;FLI1|1;ETS1|1;C11orf45|1;BARX2|1;
Astle_et_al_2016_Sum_neutrophil_eosinophil_counts|region1209	1	3	ANKRD33|1;ACVRL1|1;ACVR1B|1;
Astle_et_al_2016_Sum_neutrophil_eosinophil_counts|region1244	1	5	FAM109A|1;BRAP|1;ATXN2|1;ALDH2|1;ACAD10|1;
Astle_et_al_2016_Sum_neutrophil_eosinophil_counts|region131	1	2	OR2B11|1;NLRP3|1;
Astle_et_al_2016_Sum_neutrophil_eosinophil_counts|region1367	1	1	RIN3|1;
Astle_et_al_2016_Sum_neutrophil_eosinophil_counts|region1476	1	6	USP10|1;TLDC1|1;TAF1C|1;KLHL36|1;CRISPLD2|1;COTL1|1;
Astle_et_al_2016_Sum_neutrophil_eosinophil_counts|region1486	1	1	RABEP1|1;
Astle_et_al_2016_Sum_neutrophil_eosinophil_counts|region1488	1	92	YBX2|1;XAF1|1;WRAP53|1;VAMP2|1;USP43|1;TXNDC17|1;TRAPPC1|1;TP53|1;TNK1|1;TNFSF13|1;TNFSF12-TNFSF13|1;TNFSF12|1;TMEM88|1;TMEM256-PLSCR3|1;TMEM256|1;TMEM107|1;TMEM102|1;TEKT1|1;STX8|1;SOX15|1;SLC2A4|1;SLC25A35|1;SLC16A13|1;SLC16A11|1;SHBG|1;SENP3-EIF4A1|1;SENP3|1;SAT2|1;RPL26|1;RNF222|1;RNASEK-C17orf49|1;RNASEK|1;RANGRF|1;PLSCR3|1;PITPNM3|1;PIMREG|1;PIK3R6|1;PIK3R5|1;PHF23|1;PFAS|1;PER1|1;ODF4|1;NT…
Astle_et_al_2016_Sum_neutrophil_eosinophil_counts|region1508	1	14	RP11-707O23.1|1;RP11-259G18.3|1;MAPT-IT1|1;MAPT-AS1|1;MAPT|1;MAPK8IP1P2|1;MAPK8IP1P1|1;LRRC37A4P|1;LRRC37A2|1;LRRC37A|1;LINC02210|1;KANSL1-AS1|1;DND1P1|1;ADAM11|1;
Astle_et_al_2016_Sum_neutrophil_eosinophil_counts|region1556	1	1	MAPK4|1;
Astle_et_al_2016_Sum_neutrophil_eosinophil_counts|region1591	1	5	SSBP4|1;PGPEP1|1;LRRC25|1;GDF15|1;ELL|1;
Astle_et_al_2016_Sum_neutrophil_eosinophil_counts|region189	1	2	TBC1D8-AS1|1;TBC1D8|1;
Astle_et_al_2016_Sum_neutrophil_eosinophil_counts|region436	1	1	KIT|1;
Astle_et_al_2016_Sum_neutrophil_eosinophil_counts|region636	1	3	SSR1|1;RREB1|1;CAGE1|1;
Astle_et_al_2016_Sum_neutrophil_eosinophil_counts|region654	1	1	HCG26|1;
Astle_et_al_2016_Sum_neutrophil_eosinophil_counts|region662	1	1	TRERF1|1;
Astle_et_al_2016_Sum_neutrophil_eosinophil_counts|region718	1	1	HBS1L|1;
Astle_et_al_2016_Sum_neutrophil_eosinophil_counts|region855	1	1	GATA4|1;
Astle_et_al_2016_Sum_neutrophil_eosinophil_counts|region869	1	6	WRN|1;RBPMS-AS1|1;RBPMS|1;PURG|1;PPP2CB|1;DCTN6|1;
Astle_et_al_2016_Sum_neutrophil_eosinophil_counts|region925	1	1	GSDMC|1;
Astle_et_al_2016_Sum_neutrophil_eosinophil_counts|region937	1	2	VLDLR-AS1|1;VLDLR|1;
Astle_et_al_2016_White_blood_cell_count|region1004	1	1	ABO|1;
Astle_et_al_2016_White_blood_cell_count|region1069	1	6	TBC1D12|1;SLC35G1|1;PLCE1-AS1|1;PLCE1|1;NOC3L|1;HELLS|1;
Astle_et_al_2016_White_blood_cell_count|region1156	1	3	KDELC2|1;EXPH5|1;C11orf65|1;
Astle_et_al_2016_White_blood_cell_count|region1160	1	1	ZBTB16|1;
Astle_et_al_2016_White_blood_cell_count|region1173	1	3	LOC101929538|1;LOC101929517|1;ETS1|1;
Astle_et_al_2016_White_blood_cell_count|region1181	1	1	CCND2|1;
Astle_et_al_2016_White_blood_cell_count|region1209	1	3	ANKRD33|1;ACVRL1|1;ACVR1B|1;
Astle_et_al_2016_White_blood_cell_count|region1244	1	5	FAM109A|1;BRAP|1;ATXN2|1;ALDH2|1;ACAD10|1;
Astle_et_al_2016_White_blood_cell_count|region131	1	2	OR2B11|1;NLRP3|1;
Astle_et_al_2016_White_blood_cell_count|region1367	1	1	RIN3|1;
Astle_et_al_2016_White_blood_cell_count|region1476	1	6	USP10|1;TLDC1|1;TAF1C|1;KLHL36|1;CRISPLD2|1;COTL1|1;
Astle_et_al_2016_White_blood_cell_count|region1486	1	1	RABEP1|1;
Astle_et_al_2016_White_blood_cell_count|region1488	1	92	YBX2|1;XAF1|1;WRAP53|1;VAMP2|1;USP43|1;TXNDC17|1;TRAPPC1|1;TP53|1;TNK1|1;TNFSF13|1;TNFSF12-TNFSF13|1;TNFSF12|1;TMEM88|1;TMEM256-PLSCR3|1;TMEM256|1;TMEM107|1;TMEM102|1;TEKT1|1;STX8|1;SOX15|1;SLC2A4|1;SLC25A35|1;SLC16A13|1;SLC16A11|1;SHBG|1;SENP3-EIF4A1|1;SENP3|1;SAT2|1;RPL26|1;RNF222|1;RNASEK-C17orf49|1;RNASEK|1;RANGRF|1;PLSCR3|1;PITPNM3|1;PIMREG|1;PIK3R6|1;PIK3R5|1;PHF23|1;PFAS|1;PER1|1;ODF4|1;NT…
Astle_et_al_2016_White_blood_cell_count|region15	1	3	LOC101928163|1;E2F2|1;ASAP3|1;
Astle_et_al_2016_White_blood_cell_count|region1556	1	1	MAPK4|1;
Astle_et_al_2016_White_blood_cell_count|region189	1	2	TBC1D8-AS1|1;TBC1D8|1;
Astle_et_al_2016_White_blood_cell_count|region227	1	7	TBR1|1;RBMS1|1;PSMD14|1;LY75-CD302|1;LY75|1;LOC100505984|1;DPP4|1;
Astle_et_al_2016_White_blood_cell_count|region267	1	19	TEX44|1;RPL28P2|1;PTMA|1;PDE6D|1;NPPC|1;NMUR1|1;NCL|1;LOC101928881|1;LINC00471|1;ITM2C|1;GIGYF2|1;EFHD1|1;DIS3L2|1;COPS7B|1;CHRNG|1;CHRND|1;B3GNT7|1;ARMC9|1;ALPP|1;
Astle_et_al_2016_White_blood_cell_count|region284	1	10	TSEN2|1;TIMP4|1;TAMM41|1;SYN2|1;RPL32|1;PPARG|1;MKRN2OS|1;MKRN2|1;CAND2|1;ATG7|1;
Astle_et_al_2016_White_blood_cell_count|region436	1	1	KIT|1;
Astle_et_al_2016_White_blood_cell_count|region636	1	3	SSR1|1;RREB1|1;CAGE1|1;
Astle_et_al_2016_White_blood_cell_count|region654	1	1	HCG26|1;
Astle_et_al_2016_White_blood_cell_count|region718	1	1	HBS1L|1;
Astle_et_al_2016_White_blood_cell_count|region855	1	1	GATA4|1;
Astle_et_al_2016_White_blood_cell_count|region869	1	6	WRN|1;RBPMS-AS1|1;RBPMS|1;PURG|1;PPP2CB|1;DCTN6|1;
Astle_et_al_2016_White_blood_cell_count|region925	1	1	GSDMC|1;
Astle_et_al_2016_White_blood_cell_count|region950	1	3	CDKN2B-AS1|1;CDKN2B|1;CDKN2A|1;
BCAC_ER_negative_BreastCancer_EUR|region552	1	16	SLC38A9|1;SETD9|1;RNF138P1|1;RAB3C|1;PLPP1|1;PLK2|1;MIER3|1;MAP3K1|1;LOC102467080|1;LOC101928505|1;LINC01948|1;IL6ST|1;GPX8|1;GAPT|1;FLJ31104|1;C5orf67|1;
BCAC_ER_positive_BreastCancer_EUR|region1196	1	1	PTHLH|1;
BCAC_Overall_BreastCancer_EUR|region1058	1	12	ZMIZ1-AS1|1;ZMIZ1|1;RPS24|1;PPIF|1;POLR3A|1;MAT1A|1;LOC101929574|1;LINC00856|1;LINC00595|1;DLG5-AS1|1;DLG5|1;BMS1P21|1;
BCAC_Overall_BreastCancer_EUR|region1129	1	3	SNX32|1;FIBP|1;CTSW|1;
BCAC_Overall_BreastCancer_EUR|region1131	1	1	TPCN2|1;
BCAC_Overall_BreastCancer_EUR|region1655	1	1	RBM11|1;
BCAC_Overall_BreastCancer_EUR|region552	1	16	SLC38A9|1;SETD9|1;RNF138P1|1;RAB3C|1;PLPP1|1;PLK2|1;MIER3|1;MAP3K1|1;LOC102467080|1;LOC101928505|1;LINC01948|1;IL6ST|1;GPX8|1;GAPT|1;FLJ31104|1;C5orf67|1;
BCAC_Overall_BreastCancer_EUR|region567	1	3	RPS23|1;ATP6AP1L|1;ATG10|1;
BCAC_Overall_BreastCancer_EUR|region924	1	1	MYC|1;
CARDIoGRAM_C4D_CAD_ADDITIVE|region1004	1	1	ABO|1;
CARDIoGRAM_C4D_CAD_ADDITIVE|region1231	1	1	ATP2B1|1;
CARDIoGRAM_C4D_CAD_ADDITIVE|region1244	1	5	FAM109A|1;BRAP|1;ATXN2|1;ALDH2|1;ACAD10|1;
CARDIoGRAM_C4D_CAD_ADDITIVE|region1373	1	2	SETD3|1;CCNK|1;
CARDIoGRAM_C4D_CAD_ADDITIVE|region144	1	1	APOB|1;
CARDIoGRAM_C4D_CAD_ADDITIVE|region34	1	2	PLPP3|1;C1orf168|1;
EAGLE_Eczema|region1135	1	10	TSKU|1;THAP12|1;MYO7A|1;LRRC32|1;LOC101928837|1;LOC100506127|1;GUCY2EP|1;GDPD4|1;EMSY|1;AQP11|1;
EGG_BW3_EUR|region1079	1	1	ADRB1|1;
EGG_BW3_EUR|region1085	1	1	PLEKHA1|1;
EGG_BW3_EUR|region1509	1	7	SP6|1;SP2|1;SCRN2|1;MRPL10|1;LRRC46|1;LOC102724532|1;CDK5RAP3|1;
EGG_BW3_EUR|region762	1	6	TRA2A|1;RPS2P32|1;NUPL2|1;MALSU1|1;IGF2BP3|1;CCDC126|1;
GIANT_HEIGHT|region1007	1	1	QSOX2|1;
GIANT_HEIGHT|region1041	1	10	WASHC2A|1;PRKG1-AS1|1;PRKG1|1;NCOA4|1;LOC102724719|1;FAM21EP|1;DKK1|1;CSTF2T|1;ASAH2B|1;A1CF|1;
GIANT_HEIGHT|region1082	1	1	GRK5|1;
GIANT_HEIGHT|region1094	1	7	SIRT3|1;SCGB1C2|1;SCGB1C1|1;RIC8A|1;PSMD13|1;ODF3|1;BET1L|1;
GIANT_HEIGHT|region1121	1	1	AMBRA1|1;
GIANT_HEIGHT|region1165	1	2	TMEM136|1;ARHGEF12|1;
GIANT_HEIGHT|region1178	1	6	RAD52|1;LINC00942|1;KDM5A|1;ERC1|1;CCDC77|1;B4GALNT3|1;
GIANT_HEIGHT|region1188	1	1	ETV6|1;
GIANT_HEIGHT|region132	1	16	TSSC1|1;TRAPPC12|1;TMEM18|1;SNTG2|1;SH3YL1|1;RPS7|1;RNASEH1-AS1|1;RNASEH1|1;PXDN|1;MYT1L|1;LOC105373352|1;LOC101060391|1;LINC01939|1;FAM110C|1;ADI1|1;ACP1|1;
GIANT_HEIGHT|region1405	1	3	VPS13C|1;LOC101928907|1;C2CD4A|1;
GIANT_HEIGHT|region1407	1	1	SMAD6|1;
GIANT_HEIGHT|region1410	1	1	TLE3|1;
GIANT_HEIGHT|region1429	1	2	MLST8|1;CASKIN1|1;
GIANT_HEIGHT|region1430	1	1	TRAP1|1;
GIANT_HEIGHT|region1451	1	2	SLX1A|1;INO80E|1;
GIANT_HEIGHT|region1478	1	3	LINC01081|1;LINC00917|1;FENDRR|1;
GIANT_HEIGHT|region1479	1	3	LOC101928659|1;FBXO31|1;C16orf95|1;
GIANT_HEIGHT|region1481	1	2	LINC02166|1;CDK10|1;
GIANT_HEIGHT|region1509	1	3	UBE2Z|1;ATP5MC1|1;ATP5G1|1;
GIANT_HEIGHT|region1518	1	2	GH2|1;CSH2|1;
GIANT_HEIGHT|region1521	1	2	LOC105371881|1;KCNJ16|1;
GIANT_HEIGHT|region1581	1	1	KDM4B|1;
GIANT_HEIGHT|region167	1	1	CCDC88A|1;
GIANT_HEIGHT|region1693	1	3	MIEF1|1;MGAT3|1;ATF4|1;
GIANT_HEIGHT|region235	1	34	ZAK|1;UBR3|1;TLK1|1;SSB|1;SP5|1;SLC25A12|1;RAPGEF4|1;PPIG|1;PHOSPHO2-KLHL23|1;PHOSPHO2|1;PDK1|1;MYO3B|1;METTL8|1;METTL5|1;METAP1D|1;LOC101929753|1;LOC101926913|1;LINC01124|1;KLHL41|1;KLHL23|1;ITGA6|1;HAT1|1;GORASP2|1;GAD1|1;FASTKD1|1;ERICH2|1;DYNC1I2|1;DLX2-AS1|1;DLX2|1;DLX1|1;DCAF17|1;CYBRD1|1;CCDC173|1;BBS5|1;
GIANT_HEIGHT|region258	1	8	XRCC5|1;VWC2L|1;TMEM169|1;PECR|1;LOC102724849|1;LINC00607|1;FN1|1;ATIC|1;
GIANT_HEIGHT|region28	1	3	LINC01389|1;FOXD2-AS1|1;FOXD2|1;
GIANT_HEIGHT|region284	1	19	VHL|1;VGLL4|1;TSEN2|1;TMEM40|1;TIMP4|1;TAMM41|1;SEC13|1;RAF1|1;PPARG|1;MKRN2OS|1;MKRN2|1;LINC02022|1;LINC00852|1;JAGN1|1;IL17RE|1;GHRL|1;EMC3-AS1|1;BRK1|1;ATG7|1;
GIANT_HEIGHT|region285	1	1	FBLN2|1;
GIANT_HEIGHT|region302	1	2	VILL|1;CTDSPL|1;
GIANT_HEIGHT|region323	1	6	SHQ1|1;RYBP|1;PDZRN3-AS1|1;PDZRN3|1;LINC00877|1;GXYLT2|1;
GIANT_HEIGHT|region33	1	1	SSBP3|1;
GIANT_HEIGHT|region400	1	5	TMEM129|1;TACC3|1;SLBP|1;RP11-572O17.1|1;FAM53A|1;
GIANT_HEIGHT|region438	1	11	THEGL|1;SPINK2|1;REST|1;POLR2B|1;NOA1|1;LOC101928851|1;IGFBP7-AS1|1;IGFBP7|1;HOPX|1;ARL9|1;AASDH|1;
GIANT_HEIGHT|region6	1	1	LOC100506022|1;
GIANT_HEIGHT|region601	1	3	PSD2-AS1|1;PSD2|1;CXXC5|1;
GIANT_HEIGHT|region619	1	8	WWC1|1;SPDL1|1;SLIT3|1;RARS|1;PANK3|1;LOC101927969|1;FBLL1|1;FAM196B|1;
GIANT_HEIGHT|region622	1	1	FGF18|1;
GIANT_HEIGHT|region636	1	1	BMP6|1;
GIANT_HEIGHT|region685	1	1	FAM46A|1;
GIANT_HEIGHT|region699	1	9	PREP|1;PRDM1|1;POPDC3|1;LIN28B-AS1|1;LIN28B|1;HACE1|1;BVES-AS1|1;BVES|1;ATG5|1;
GIANT_HEIGHT|region707	1	13	ZUFSP|1;RSPH4A|1;ROS1|1;PLN|1;NUS1|1;LOC101927919|1;KPNA5|1;GOPC|1;FRK|1;FAM26F|1;FAM184A|1;DCBLD1|1;BRD7P3|1;
GIANT_HEIGHT|region745	1	1	AMZ1|1;
GIANT_HEIGHT|region762	1	6	TRA2A|1;RPS2P32|1;NUPL2|1;MALSU1|1;IGF2BP3|1;CCDC126|1;
GIANT_HEIGHT|region79	1	2	VANGL2|1;SLAMF1|1;
GIANT_HEIGHT|region934	1	1	PLEC|1;
GIANT_HEIGHT|region984	1	1	COL15A1|1;
IBD.EUR.Crohns_Disease|region105	1	3	MAPKAPK2|1;IL19|1;IL10|1;
IBD.EUR.Crohns_Disease|region1050	1	2	EGR2|1;ADO|1;
IBD.EUR.Crohns_Disease|region1135	1	10	TSKU|1;THAP12|1;MYO7A|1;LRRC32|1;LOC101928837|1;LOC100506127|1;GUCY2EP|1;GDPD4|1;EMSY|1;AQP11|1;
IBD.EUR.Crohns_Disease|region1501	1	2	CCL8|1;CCL2|1;
IBD.EUR.Crohns_Disease|region1693	1	1	PDGFB|1;
IBD.EUR.Crohns_Disease|region613	1	5	TTC1|1;LOC285626|1;IL12B|1;C1QTNF2|1;AC008697.1|1;
IBD.EUR.Crohns_Disease|region940	1	1	JAK2|1;
IBD.EUR.Inflammatory_Bowel_Disease|region105	1	3	MAPKAPK2|1;IL19|1;IL10|1;
IBD.EUR.Inflammatory_Bowel_Disease|region1135	1	10	TSKU|1;THAP12|1;MYO7A|1;LRRC32|1;LOC101928837|1;LOC100506127|1;GUCY2EP|1;GDPD4|1;EMSY|1;AQP11|1;
IBD.EUR.Inflammatory_Bowel_Disease|region12	1	3	TMCO4|1;RNF186|1;OTUD3|1;
IBD.EUR.Inflammatory_Bowel_Disease|region1501	1	2	CCL8|1;CCL2|1;
IBD.EUR.Inflammatory_Bowel_Disease|region1693	1	1	PDGFB|1;
IBD.EUR.Inflammatory_Bowel_Disease|region641	1	11	RNF182|1;RANBP9|1;NOL7|1;MYLIP|1;MCUR1|1;LINC01108|1;JARID2-AS1|1;JARID2|1;GMPR|1;DTNBP1|1;CD83|1;
IBD.EUR.Inflammatory_Bowel_Disease|region940	1	1	JAK2|1;
IBD.EUR.Ulcerative_Colitis|region105	1	3	MAPKAPK2|1;IL19|1;IL10|1;
IBD.EUR.Ulcerative_Colitis|region1135	1	10	TSKU|1;THAP12|1;MYO7A|1;LRRC32|1;LOC101928837|1;LOC100506127|1;GUCY2EP|1;GDPD4|1;EMSY|1;AQP11|1;
IBD.EUR.Ulcerative_Colitis|region12	1	3	TMCO4|1;RNF186|1;OTUD3|1;
IBD.EUR.Ulcerative_Colitis|region5	1	5	SLC45A1|1;RP11-431K24.1|1;PARK7|1;LINC01714|1;ERRFI1|1;
IBD.EUR.Ulcerative_Colitis|region940	1	1	JAK2|1;
IGAP_Alzheimer|region1578	1	10	TMEM259|1;STK11|1;SBNO2|1;POLR2E|1;GRIN3B|1;GPX4|1;CNN2|1;CIRBP|1;ARHGAP45|1;ABCA7|1;
IGAP_Alzheimer|region830	1	2	EPHA1-AS1|1;EPHA1|1;
IMMUNOBASE_Systemic_lupus_erythematosus_hg19|region1614	1	5	TMEM86B|1;RPL28|1;PPP6R1|1;HSPBP1|1;BRSK1|1;
IMMUNOBASE_Systemic_lupus_erythematosus_hg19|region1681	1	3	YDJC|1;SDF2L1|1;CCDC116|1;
IMMUNOBASE_Systemic_lupus_erythematosus_hg19|region197	1	3	PSD4|1;IL1RN|1;IL1F10|1;
MAGIC_FastingGlucose|region1121	1	17	TP53I11|1;SLC35C1|1;PRDM11|1;PHF21A|1;PEX16|1;MAPK8IP1|1;LOC399886|1;LOC221122|1;LOC101928894|1;LOC101928812|1;LARGE2|1;DKFZp779M0652|1;CRY2|1;CHST1|1;C11orf94|1;C11orf49|1;AMBRA1|1;
MAGIC_FastingGlucose|region1122	1	4	PACSIN3|1;NR1H3|1;MADD|1;ACP2|1;
MAGNETIC_HDL.C|region1253	1	1	SCARB1|1;
MAGNETIC_HDL.C|region1403	1	6	POLR2M|1;MINDY2|1;LOC101928725|1;LIPC-AS1|1;LIPC|1;ADAM10|1;
MAGNETIC_IDL.TG|region144	1	1	APOB|1;
MAGNETIC_IDL.TG|region1585	1	1	LDLR|1;
MAGNETIC_IDL.TG|region563	1	2	POC5|1;HMGCR|1;
MAGNETIC_IDL.TG|region923	1	3	WASHC5|1;TRIB1|1;NSMCE2|1;
MAGNETIC_LDL.C|region1004	1	1	ABO|1;
MAGNETIC_LDL.C|region773	1	1	NPC1L1|1;
MAGNETIC_LDL.C|region923	1	3	WASHC5|1;TRIB1|1;NSMCE2|1;
MAGNETIC_LDL.C|region934	1	1	PLEC|1;
pgc.scz2|region1170	1	1	NRGN|1;
pgc.scz2|region1414	1	2	CHRNB4|1;CHRNA3|1;
pgc.scz2|region1484	1	2	SRR|1;SMG6|1;
pgc.scz2|region249	1	1	FTCDNL1|1;
pgc.scz2|region311	1	1	ITIH4|1;
pgc.scz2|region359	1	2	STAG1|1;PCCB|1;
pgc.scz2|region744	1	3	NUDT1|1;MRM2|1;MAD1L1|1;
RA_OKADA_TRANS_ETHNIC|region1015	1	3	RBM17|1;IL2RA|1;IL15RA|1;
RA_OKADA_TRANS_ETHNIC|region1353	1	15	ZFYVE26|1;ZFP36L1|1;VTI1B|1;TMEM229B|1;RAD51B|1;PLEKHH1|1;PLEK2|1;PIGH|1;MPP5|1;LOC100996664|1;FAM71D|1;EXD2|1;ARG2|1;ACTN1-AS1|1;ACTN1|1;
RA_OKADA_TRANS_ETHNIC|region149	1	4	LOC285043|1;LCLAT1|1;LBH|1;GALNT14|1;
RA_OKADA_TRANS_ETHNIC|region1537	1	13	TUBB6|1;SPIRE1|1;SEH1L|1;RNMT|1;PTPN2|1;PSMG2|1;PRELID3A|1;FAM210A|1;CEP76|1;CEP192|1;C18orf61|1;ANKRD20A5P|1;AFG3L2|1;
RA_OKADA_TRANS_ETHNIC|region315	1	3	RPP14|1;PXK|1;FLNB|1;
RA_OKADA_TRANS_ETHNIC|region419	1	7	TBC1D19|1;STIM2|1;SMIM20|1;RBPJ|1;LOC105374546|1;LOC101929199|1;LGI2|1;
RA_OKADA_TRANS_ETHNIC|region651	1	29	ZSCAN9|1;ZSCAN16-AS1|1;ZNF391|1;ZNF204P|1;ZNF192P1|1;ZNF184|1;ZKSCAN8|1;POM121L2|1;PGBD1|1;LOC100131289|1;LINC01012|1;LINC00240|1;HIST1H4L|1;HIST1H4K|1;HIST1H4J|1;HIST1H3J|1;HIST1H3I|1;HIST1H3H|1;HIST1H2BO|1;HIST1H2BM|1;HIST1H2BL|1;HIST1H2BK|1;HIST1H2AM|1;HIST1H2AL|1;HIST1H2AJ|1;HIST1H2AI|1;HIST1H2AH|1;HIST1H1B|1;GUSBP2|1;
RA_OKADA_TRANS_ETHNIC|region961	1	12	SIGMAR1|1;RPP25L|1;LOC730098|1;IL11RA|1;GALT|1;FAM205C|1;FAM205A|1;DCTN3|1;CNTFR|1;CCL27|1;CCL21|1;CCL19|1;
SSGAC_Education_Years_Pooled|region1091	1	4	TCERG1L-AS1|1;PPP2R2D|1;JAKMIP3|1;BNIP3|1;
SSGAC_Education_Years_Pooled|region1103	1	10	USP47|1;TEAD1|1;RASSF10|1;PARVA|1;MICALCL|1;LOC101928132|1;LINC00958|1;FAR1|1;DKK3|1;BTBD10|1;
SSGAC_Education_Years_Pooled|region1701	1	2	SHANK3|1;CPT1B|1;
SSGAC_Education_Years_Pooled|region54	1	2	LOC105378853|1;BARHL2|1;
UKB_1160_Sleep_duration|region853	1	13	XKR6|1;TNKS|1;RP1L1|1;PPP1R3B|1;PINX1|1;MSRA|1;MFHAS1|1;LOC101929269|1;LOC101929229|1;LINCR-0001|1;LINC00599|1;ERI1|1;CLDN23|1;
UKB_1180_Morning_or_evening_person_chronotype|region1120	1	2	SEC14L1P1|1;ALKBH3|1;
UKB_1180_Morning_or_evening_person_chronotype|region1373	1	2	WARS|1;BEGAIN|1;
UKB_1180_Morning_or_evening_person_chronotype|region1496	1	3	RASD1|1;PEMT|1;MED9|1;
UKB_1180_Morning_or_evening_person_chronotype|region1520	1	2	PSMD12|1;PITPNC1|1;
UKB_1180_Morning_or_evening_person_chronotype|region1532	1	1	AKAIN1|1;
UKB_1180_Morning_or_evening_person_chronotype|region158	1	1	LRPPRC|1;
UKB_1180_Morning_or_evening_person_chronotype|region54	1	2	LOC105378853|1;BARHL2|1;
UKB_1180_Morning_or_evening_person_chronotype|region737	1	4	PDE10A|1;LINC00602|1;LINC00473|1;C6orf118|1;
UKB_1200_Sleeplessness_or_insomnia|region348	1	1	LSAMP|1;
UKB_1200_Sleeplessness_or_insomnia|region853	1	1	LINC00599|1;
UKB_20002_1065_self_reported_hypertension|region1022	1	2	SLC39A12|1;HACD1|1;
UKB_20002_1065_self_reported_hypertension|region1039	1	2	TMEM72-AS1|1;TMEM72|1;
UKB_20002_1065_self_reported_hypertension|region1092	1	1	INPP5A|1;
UKB_20002_1065_self_reported_hypertension|region1101	1	4	WEE1|1;SWAP70|1;SBF2-AS1|1;LOC440028|1;
UKB_20002_1065_self_reported_hypertension|region1122	1	1	PTPRJ|1;
UKB_20002_1065_self_reported_hypertension|region1127	1	8	VWCE|1;TMEM216|1;TMEM138|1;TKFC|1;SDHAF2|1;DDB1|1;CYB561A3|1;CPSF7|1;
UKB_20002_1065_self_reported_hypertension|region1210	1	1	HOXC5|1;
UKB_20002_1065_self_reported_hypertension|region1244	1	5	FAM109A|1;BRAP|1;ATXN2|1;ALDH2|1;ACAD10|1;
UKB_20002_1065_self_reported_hypertension|region147	1	4	SLC35F6|1;KCNK3|1;CIB4|1;C2orf70|1;
UKB_20002_1065_self_reported_hypertension|region1481	1	4	SPATA33|1;DPEP1|1;CPNE7|1;CHMP1A|1;
UKB_20002_1065_self_reported_hypertension|region1485	1	6	ZZEF1|1;P2RX1|1;NCBP3|1;CYB5D2|1;CAMKK1|1;ATP2A3|1;
UKB_20002_1065_self_reported_hypertension|region1508	1	4	WNT9B|1;WNT3|1;RPRML|1;GOSR2|1;
UKB_20002_1065_self_reported_hypertension|region1585	1	1	ICAM5|1;
UKB_20002_1065_self_reported_hypertension|region1643	1	3	OSER1|1;JPH2|1;FITM2|1;
UKB_20002_1065_self_reported_hypertension|region1655	1	3	USP25|1;RBM11|1;NRIP1|1;
UKB_20002_1065_self_reported_hypertension|region1675	1	5	RRP1B|1;RRP1|1;PDXK|1;HSF2BP|1;CSTB|1;
UKB_20002_1065_self_reported_hypertension|region612	1	1	LINC02227|1;
UKB_20002_1065_self_reported_hypertension|region648	1	6	HIST1H3C|1;HIST1H3B|1;HIST1H2BB|1;HIST1H2APS5|1;HIST1H2AB|1;HIST1H1C|1;
UKB_20002_1065_self_reported_hypertension|region807	1	2	PIK3CG|1;CCDC71L|1;
UKB_20002_1065_self_reported_hypertension|region855	1	21	XKR6|1;SOX7|1;RP1L1|1;PINX1|1;NEIL2|1;MTMR9|1;MSRA|1;LONRF1|1;LOC340357|1;LOC101929269|1;LOC101929229|1;LINC00599|1;GATA4|1;FDFT1|1;FAM86B1|1;FAM167A|1;DLC1|1;CTSB|1;C8orf49|1;C8orf48|1;BLK|1;
UKB_20002_1065_self_reported_hypertension|region864	1	1	SLC25A37|1;
UKB_20002_1111_self_reported_asthma|region1135	1	10	TSKU|1;THAP12|1;MYO7A|1;LRRC32|1;LOC101928837|1;LOC100506127|1;GUCY2EP|1;GDPD4|1;EMSY|1;AQP11|1;
UKB_20002_1111_self_reported_asthma|region1164	1	1	CXCR5|1;
UKB_20002_1111_self_reported_asthma|region1251	1	17	XLOC_009911|1;UNC119B|1;SRSF9|1;SPPL3|1;POP5|1;P2RX7|1;P2RX4|1;ORAI1|1;OASL|1;MLEC|1;HNF1A-AS1|1;COX6A1|1;CIT|1;CAMKK2|1;C12orf43|1;BICDL1|1;ACADS|1;
UKB_20002_1111_self_reported_asthma|region1353	1	15	ZFYVE26|1;ZFP36L1|1;VTI1B|1;TMEM229B|1;RAD51B|1;PLEKHH1|1;PLEK2|1;PIGH|1;MPP5|1;LOC100996664|1;FAM71D|1;EXD2|1;ARG2|1;ACTN1-AS1|1;ACTN1|1;
UKB_20002_1111_self_reported_asthma|region137	1	2	LINC00299|1;ID2|1;
UKB_20002_1111_self_reported_asthma|region396	1	8	WDR53|1;SDHAP1|1;PIGX|1;PAK2|1;NRROS|1;LINC01063|1;FBXO45|1;CEP19|1;
UKB_20002_1111_self_reported_asthma|region428	1	2	TLR6|1;FAM114A1|1;
UKB_20002_1111_self_reported_asthma|region543	1	1	IL7R|1;
UKB_20002_1111_self_reported_asthma|region612	1	8	THG1L|1;SOX30|1;NIPAL4|1;LSM11|1;LOC102724404|1;CYFIP2|1;C5orf52|1;ADAM19|1;
UKB_20002_1111_self_reported_asthma|region645	1	6	SOX4|1;NBAT1|1;MBOAT1|1;LOC105374972|1;CDKAL1|1;CASC15|1;
UKB_20002_1111_self_reported_asthma|region656	1	1	HLA-DMA|1;
UKB_20002_1111_self_reported_asthma|region657	1	3	ZNF76|1;TCP11|1;DEF6|1;
UKB_20002_1111_self_reported_asthma|region690	1	13	UBE2J1|1;RRAGD|1;RNGTT|1;PM20D2|1;MDN1|1;MAP3K7|1;LYRM2|1;LOC101929057|1;GJA10|1;GABRR2|1;CASP8AP2|1;BACH2|1;ANKRD6|1;
UKB_20002_1111_self_reported_asthma|region710	1	8	TBC1D32|1;SMPDL3A|1;SERINC1|1;PKIB|1;HSF2|1;GJA1|1;FABP7|1;CLVS2|1;
UKB_20002_1111_self_reported_asthma|region85	1	18	TNFSF4|1;TNFSF18|1;SUCO|1;SLC9C2|1;RP3-395P12.2|1;PRDX6|1;PIGC|1;LOC730159|1;LOC102724601|1;LOC101928696|1;LOC100506023|1;KLHL20|1;GAS5-AS1|1;FASLG|1;DNM3|1;DARS2|1;CENPL|1;ANKRD45|1;
UKB_20002_1111_self_reported_asthma|region897	1	19	ZNF704|1;ZFAND1|1;ZC2HC1A|1;ZBTB10|1;TPD52|1;STMN2|1;SNX16|1;RNU6-1213P|1;PAG1|1;MRPS28|1;LOC101927040|1;LINC01607|1;IMPA1|1;IL7|1;HEY1|1;FABP5|1;FABP4|1;FABP12|1;CHMP4C|1;
UKB_20002_1111_self_reported_asthma|region940	1	1	IL33|1;
UKB_20002_1111_self_reported_asthma|region951	1	2	LOC101929563|1;DMRTA1|1;
UKB_20002_1222_self_reported_type_1_diabetes|region653	1	11	TRIM39|1;TRIM26|1;PPP1R18|1;PPP1R10|1;NRM|1;MDC1|1;HLA-K|1;GTF2H4|1;DHX16|1;CCHCR1|1;ABCF1|1;
UKB_20002_1226_self_reported_hypothyroidism_or_myxoedema|region1015	1	17	RBM17|1;PRKCQ-AS1|1;PRKCQ|1;PFKFB3|1;NET1|1;LOC105376382|1;LINP1|1;IL15RA|1;GDI2|1;FBXO18|1;FAM208B|1;CALML3-AS1|1;CALML3|1;ASB13|1;ANKRD16|1;AKR1E2|1;AKR1C1|1;
UKB_20002_1226_self_reported_hypothyroidism_or_myxoedema|region1116	1	12	TRIM44|1;TRAF6|1;RP1-68D18.3|1;PRR5L|1;PDHX|1;PAMR1|1;LDLRAD3|1;FJX1|1;COMMD9|1;CD44|1;C11orf74|1;APIP|1;
UKB_20002_1226_self_reported_hypothyroidism_or_myxoedema|region1244	1	5	FAM109A|1;BRAP|1;ATXN2|1;ALDH2|1;ACAD10|1;
UKB_20002_1226_self_reported_hypothyroidism_or_myxoedema|region1264	1	2	SPATA13-AS1|1;SPATA13|1;
UKB_20002_1226_self_reported_hypothyroidism_or_myxoedema|region132	1	1	TPO|1;
UKB_20002_1226_self_reported_hypothyroidism_or_myxoedema|region1353	1	15	ZFYVE26|1;ZFP36L1|1;VTI1B|1;TMEM229B|1;RAD51B|1;PLEKHH1|1;PLEK2|1;PIGH|1;MPP5|1;LOC100996664|1;FAM71D|1;EXD2|1;ARG2|1;ACTN1-AS1|1;ACTN1|1;
UKB_20002_1226_self_reported_hypothyroidism_or_myxoedema|region1477	1	1	IRF8|1;
UKB_20002_1226_self_reported_hypothyroidism_or_myxoedema|region1489	1	1	PIK3R5|1;
UKB_20002_1226_self_reported_hypothyroidism_or_myxoedema|region419	1	7	TBC1D19|1;STIM2|1;SMIM20|1;RBPJ|1;LOC105374546|1;LOC101929199|1;LGI2|1;
UKB_20002_1226_self_reported_hypothyroidism_or_myxoedema|region430	1	1	CHRNA9|1;
UKB_20002_1226_self_reported_hypothyroidism_or_myxoedema|region650	1	1	LOC100131289|1;
UKB_20002_1226_self_reported_hypothyroidism_or_myxoedema|region654	1	2	PSORS1C1|1;C6orf15|1;
UKB_20002_1226_self_reported_hypothyroidism_or_myxoedema|region690	1	1	BACH2|1;
UKB_20002_1226_self_reported_hypothyroidism_or_myxoedema|region853	1	13	XKR6|1;TNKS|1;RP1L1|1;PPP1R3B|1;PINX1|1;MSRA|1;MFHAS1|1;LOC101929269|1;LOC101929229|1;LINCR-0001|1;LINC00599|1;ERI1|1;CLDN23|1;
UKB_20002_1226_self_reported_hypothyroidism_or_myxoedema|region919	1	2	TNFRSF11B|1;COLEC10|1;
UKB_20002_1226_self_reported_hypothyroidism_or_myxoedema|region924	1	5	TMEM75|1;PVT1|1;MYC|1;CASC19|1;CASC11|1;
UKB_20002_1226_self_reported_hypothyroidism_or_myxoedema|region932	1	2	PTK2|1;AGO2|1;
UKB_20002_1265_self_reported_migraine|region1	1	1	PRDM16|1;
UKB_20002_1265_self_reported_migraine|region694	1	6	UFL1|1;NDUFAF4|1;MMS22L|1;KLHL32|1;GPR63|1;FHL5|1;
UKB_20002_1309_self_reported_osteoporosis|region42	1	5	WLS|1;GNG12-AS1|1;GNG12|1;DEPDC1-AS1|1;DEPDC1|1;
UKB_20002_1313_self_reported_ankylosing_spondylitis|region655	1	5	SKIV2L|1;LY6G5B|1;DDX39B|1;CSNK2B|1;BAG6|1;
UKB_20002_1452_self_reported_eczema_or_dermatitis|region1135	1	10	TSKU|1;THAP12|1;MYO7A|1;LRRC32|1;LOC101928837|1;LOC100506127|1;GUCY2EP|1;GDPD4|1;EMSY|1;AQP11|1;
UKB_20002_1452_self_reported_eczema_or_dermatitis|region654	1	1	NCR3|1;
UKB_20002_1453_self_reported_psoriasis|region607	1	7	TNIP1|1;SMIM3|1;LINC01933|1;GPX3|1;GM2A|1;GLRA1|1;ANXA6|1;
UKB_20002_1453_self_reported_psoriasis|region74	1	1	LCE3D|1;
UKB_20002_1453_self_reported_psoriasis|region959	1	5	TOPORS-AS1|1;TOPORS|1;NDUFB6|1;DDX58|1;ACO1|1;
UKB_20002_1463_self_reported_ulcerative_colitis|region105	1	3	MAPKAPK2|1;IL19|1;IL10|1;
UKB_20002_1466_self_reported_gout|region1047	1	1	SLC16A9|1;
UKB_20002_1466_self_reported_gout|region562	1	4	TMEM171|1;LOC340090|1;FCHO2|1;BTF3|1;
UKB_20002_1473_self_reported_high_cholesterol|region1004	1	1	ABO|1;
UKB_20002_1473_self_reported_high_cholesterol|region1078	1	9	ZDHHC6|1;VTI1A|1;TCF7L2|1;NHLRC2|1;GPAM|1;DCLRE1A|1;CCDC186|1;CASP7|1;ACSL5|1;
UKB_20002_1473_self_reported_high_cholesterol|region121	1	6	TARBP1|1;LOC101927787|1;LINC01354|1;LINC01132|1;LINC00184|1;IRF2BP2|1;
UKB_20002_1473_self_reported_high_cholesterol|region1465	1	2	TXNL4B|1;DHX38|1;
UKB_20002_1473_self_reported_high_cholesterol|region1585	1	1	LDLR|1;
UKB_20002_1473_self_reported_high_cholesterol|region1628	1	2	RRBP1|1;BANF2|1;
UKB_20002_1473_self_reported_high_cholesterol|region445	1	1	TMPRSS11E|1;
UKB_20002_1473_self_reported_high_cholesterol|region563	1	1	HMGCR|1;
UKB_20002_1473_self_reported_high_cholesterol|region718	1	1	HBS1L|1;
UKB_20002_1473_self_reported_high_cholesterol|region885	1	1	SDCBP|1;
UKB_20016_Fluid_intelligence_score|region1439	1	3	TNFRSF17|1;SNX29|1;LOC642696|1;
UKB_20016_Fluid_intelligence_score|region509	1	2	LOC101930370|1;GALNT7|1;
UKB_20016_Fluid_intelligence_score|region555	1	4	NDUFAF2|1;ERCC8|1;ELOVL7|1;DEPDC1B|1;
UKB_20016_Fluid_intelligence_score|region654	1	5	TCF19|1;LY6G5B|1;HLA-C|1;HLA-B|1;ABHD16A|1;
UKB_20016_Fluid_intelligence_score|region702	1	2	FOXO3|1;ARMC2|1;
UKB_20022_Birth_weight|region1195	1	1	ITPR2|1;
UKB_20022_Birth_weight|region1206	1	13	SLC38A4|1;SLC38A2|1;SLC38A1|1;SCAF11|1;RNY5|1;RACGAP1P|1;PLEKHA8P1|1;PCED1B|1;NELL2|1;LOC100288798|1;DBX2|1;ANO6|1;AMIGO2|1;
UKB_20022_Birth_weight|region1244	1	5	FAM109A|1;BRAP|1;ATXN2|1;ALDH2|1;ACAD10|1;
UKB_20022_Birth_weight|region1322	1	6	ZNF219|1;TMEM253|1;SLC39A2|1;NDRG2|1;LOC101929718|1;ARHGEF40|1;
UKB_20022_Birth_weight|region1373	1	11	YY1|1;WDR25|1;WARS|1;SLC25A29|1;MEG3|1;LINC00524|1;EVL|1;EML1|1;DEGS2|1;CYP46A1|1;BEGAIN|1;
UKB_20022_Birth_weight|region1498	1	3	WSB1|1;LGALS9|1;KSR1|1;
UKB_20022_Birth_weight|region1697	1	27	WNT7B|1;TTC38|1;TRMU|1;TBC1D22A|1;SMC1B|1;RIBC2|1;PRR34-AS1|1;PRR34|1;PPARA|1;PHF21B|1;NUP50-AS1|1;NUP50|1;MIRLET7BHG|1;LOC730668|1;LOC642648|1;LOC284930|1;LINC00899|1;LINC00898|1;KIAA0930|1;GTSE1-AS1|1;GTSE1|1;GRAMD4|1;FBLN1|1;FAM118A|1;CERK|1;CDPF1|1;ATXN10|1;
UKB_20022_Birth_weight|region351	1	1	ADCY5|1;
UKB_20022_Birth_weight|region414	1	7	QDPR|1;NCAPG|1;MED28|1;LCORL|1;LAP3|1;FAM184B|1;DCAF16|1;
UKB_20022_Birth_weight|region491	1	2	HHIP-AS1|1;HHIP|1;
UKB_20022_Birth_weight|region612	1	1	LINC02227|1;
UKB_20022_Birth_weight|region761	1	21	TRA2A|1;TOMM7|1;STEAP1B|1;SP8|1;SP4|1;RPS2P32|1;RAPGEF5|1;NUPL2|1;MALSU1|1;LOC541472|1;LOC401312|1;LOC100506178|1;KLHL7-AS1|1;KLHL7|1;IL6|1;IGF2BP3|1;FAM221A|1;FAM126A|1;DNAH11|1;CCDC126|1;AC073072.5|1;
UKB_20022_Birth_weight|region762	1	6	TRA2A|1;RPS2P32|1;NUPL2|1;MALSU1|1;IGF2BP3|1;CCDC126|1;
UKB_20022_Birth_weight|region819	1	2	SND1|1;LRRC4|1;
UKB_20022_Birth_weight|region874	1	1	C8orf86|1;
UKB_20022_Birth_weight|region932	1	2	LINC01300|1;GPR20|1;
UKB_20127_Neuroticism_score|region1480	1	2	LOC100129697|1;ACSF3|1;
UKB_20127_Neuroticism_score|region1549	1	4	TPGS2|1;KIAA1328|1;FHOD3|1;CELF4|1;
UKB_20127_Neuroticism_score|region301	1	2	ARPP21-AS1|1;ARPP21|1;
UKB_20127_Neuroticism_score|region348	1	1	LINC00901|1;
UKB_20127_Neuroticism_score|region640	1	2	HIVEP1|1;ADTRP|1;
UKB_20127_Neuroticism_score|region745	1	6	TMEM184A|1;SNX8|1;NUDT1|1;MRM2|1;MAD1L1|1;ELFN1-AS1|1;
UKB_20127_Neuroticism_score|region838	1	2	LOC105375591|1;INSIG1|1;
UKB_20127_Neuroticism_score|region982	1	6	RP11-435O5.5|1;RP11-435O5.4|1;PTCH1|1;LOC100507346|1;ERCC6L2|1;EIF4BP3|1;
UKB_21001_Body_mass_index_BMI|region1078	1	8	ZDHHC6|1;VTI1A|1;TCF7L2|1;LOC103344931|1;HABP2|1;GPAM|1;AFAP1L2|1;ADRB1|1;
UKB_21001_Body_mass_index_BMI|region1114	1	2	MPPED2|1;ARL14EP|1;
UKB_21001_Body_mass_index_BMI|region1212	1	2	SUOX|1;RAB5B|1;
UKB_21001_Body_mass_index_BMI|region1268	1	22	USPL1|1;UBL3|1;SLC7A1|1;SLC46A3|1;MTUS2-AS1|1;MTUS2|1;LINC01058|1;LINC00545|1;LINC00544|1;LINC00426|1;LINC00398|1;LINC00384|1;LINC00365|1;LINC00297|1;KATNAL1|1;HSPH1|1;HMGB1|1;FRY-AS1|1;FRY|1;EEF1DP3|1;B3GLCT|1;ALOX5AP|1;
UKB_21001_Body_mass_index_BMI|region128	1	1	SDCCAG8|1;
UKB_21001_Body_mass_index_BMI|region1309	1	2	STK24|1;FARP1|1;
UKB_21001_Body_mass_index_BMI|region1373	1	2	MEG9|1;MEG3|1;
UKB_21001_Body_mass_index_BMI|region1407	1	5	ZWILCH|1;SNORD16|1;SNAPC5|1;RPL4|1;DIS3L|1;
UKB_21001_Body_mass_index_BMI|region1430	1	10	TRAP1|1;SLX4|1;OR1F2P|1;OR1F1|1;NLRC3|1;NAA60|1;DNASE1|1;CREBBP|1;CLUAP1|1;ADCY9|1;
UKB_21001_Body_mass_index_BMI|region147	1	1	DPYSL5|1;
UKB_21001_Body_mass_index_BMI|region1487	1	2	YBX2|1;SLC2A4|1;
UKB_21001_Body_mass_index_BMI|region1509	1	3	SNF8|1;IGF2BP1|1;GIP|1;
UKB_21001_Body_mass_index_BMI|region1526	1	1	RPTOR|1;
UKB_21001_Body_mass_index_BMI|region1578	1	2	LOC100288123|1;ATP8B3|1;
UKB_21001_Body_mass_index_BMI|region1644	1	2	ZNF335|1;CD40|1;
UKB_21001_Body_mass_index_BMI|region1645	1	9	ZNFX1|1;SULF2|1;STAU1|1;PREX1|1;LINC01523|1;DDX27|1;CSE1L-AS1|1;CSE1L|1;ARFGEF2|1;
UKB_21001_Body_mass_index_BMI|region310	1	4	RBM6|1;MST1R|1;MON1A|1;GMPPB|1;
UKB_21001_Body_mass_index_BMI|region341	1	1	ALCAM|1;
UKB_21001_Body_mass_index_BMI|region379	1	1	SLC2A2|1;
UKB_21001_Body_mass_index_BMI|region381	1	6	TNFSF10|1;SPATA16|1;NLGN1-AS1|1;NLGN1|1;NCEH1|1;ECT2|1;
UKB_21001_Body_mass_index_BMI|region444	1	17	YTHDC1|1;UGT2A3|1;UBA6-AS1|1;UBA6|1;TMPRSS11GP|1;TMPRSS11F|1;TMPRSS11E|1;TMPRSS11D|1;TMPRSS11BNL|1;TMPRSS11B|1;SYT14P1|1;STAP1|1;LOC550113|1;LOC101927237|1;FTLP10|1;EPHA5|1;CENPC|1;
UKB_21001_Body_mass_index_BMI|region54	1	2	LOC105378853|1;BARHL2|1;
UKB_21001_Body_mass_index_BMI|region649	1	8	U91328.19|1;LOC108783645|1;HIST1H4C|1;HIST1H3C|1;HIST1H2BB|1;HIST1H2APS5|1;HIST1H1C|1;HFE|1;
UKB_21001_Body_mass_index_BMI|region68	1	2	LOC101928718|1;DDX20|1;
UKB_21001_Body_mass_index_BMI|region702	1	2	FOXO3|1;ARMC2|1;
UKB_21001_Body_mass_index_BMI|region73	1	19	VPS72|1;TNFAIP8L2-SCNM1|1;TNFAIP8L2|1;TMOD4|1;SEMA6C|1;SCNM1|1;PSMD4|1;PSMB4|1;PRUNE1|1;PIP5K1A|1;PI4KB|1;MLLT11|1;MINDY1|1;LYSMD1|1;GABPB2|1;CERS2|1;CDC42SE1|1;C1orf56|1;ANXA9|1;
UKB_21001_Body_mass_index_BMI|region743	1	16	ZFAND2A|1;UNCX|1;TMEM184A|1;PSMG3-AS1|1;PSMG3|1;NUDT1|1;MRM2|1;MICALL2|1;LOC101927021|1;INTS1|1;GPR146|1;GPER1|1;ELFN1-AS1|1;DNAAF5|1;CYP2W1|1;C7orf50|1;
UKB_21001_Body_mass_index_BMI|region834	1	38	ZNF862|1;ZBED6CL|1;WDR86-AS1|1;WDR86|1;TMUB1|1;TMEM176B|1;TMEM176A|1;SMARCD3|1;SLC4A2|1;RHEB|1;REPIN1|1;PRKAG2-AS1|1;PRKAG2|1;NUB1|1;NOS3|1;LRRC61|1;LINC00996|1;KCNH2|1;GIMAP8|1;GIMAP7|1;GIMAP6|1;GIMAP5|1;GIMAP1-GIMAP5|1;GIMAP1|1;GBX1|1;GALNT11|1;FASTK|1;CHPF2|1;CDK5|1;ATP6V0E2-AS1|1;ATP6V0E2|1;ASIC3|1;ASB10|1;AOC1|1;AGAP3|1;ACTR3C|1;ABCF2|1;ABCB8|1;
UKB_21001_Body_mass_index_BMI|region851	1	2	PRAG1|1;CLDN23|1;
UKB_21001_Body_mass_index_BMI|region855	1	3	LINC00208|1;DEFB136|1;DEFB135|1;
UKB_21001_Body_mass_index_BMI|region946	1	3	ZDHHC21|1;LOC389705|1;FREM1|1;
UKB_23099_Body_fat_percentage|region1086	1	3	METTL10|1;FAM175B|1;EEF1AKMT2|1;
UKB_23099_Body_fat_percentage|region1143	1	2	NOX4|1;CHORDC1|1;
UKB_23099_Body_fat_percentage|region1168	1	1	C11orf63|1;
UKB_23099_Body_fat_percentage|region1252	1	3	ZNF664|1;RFLNA|1;CCDC92|1;
UKB_23099_Body_fat_percentage|region1268	1	22	USPL1|1;UBL3|1;SLC7A1|1;SLC46A3|1;MTUS2-AS1|1;MTUS2|1;LINC01058|1;LINC00545|1;LINC00544|1;LINC00426|1;LINC00398|1;LINC00384|1;LINC00365|1;LINC00297|1;KATNAL1|1;HSPH1|1;HMGB1|1;FRY-AS1|1;FRY|1;EEF1DP3|1;B3GLCT|1;ALOX5AP|1;
UKB_23099_Body_fat_percentage|region128	1	1	SDCCAG8|1;
UKB_23099_Body_fat_percentage|region1367	1	1	RIN3|1;
UKB_23099_Body_fat_percentage|region1385	1	10	TRPM1|1;SCG5|1;OTUD7A|1;LOC283710|1;LOC102725022|1;KLF13|1;FAN1|1;CTD-3092A11.2|1;CTD-3092A11.1|1;CHRNA7|1;
UKB_23099_Body_fat_percentage|region147	1	1	DPYSL5|1;
UKB_23099_Body_fat_percentage|region1487	1	2	YBX2|1;SLC2A4|1;
UKB_23099_Body_fat_percentage|region1499	1	46	UNC119|1;TRAF4|1;TP53I13|1;TNFAIP1|1;TMIGD1|1;TMEM97|1;TMEM199|1;TIAF1|1;TEFM|1;TAOK1|1;SUZ12P1|1;SUPT6H|1;SSH2|1;SPAG5-AS1|1;SPAG5|1;SLC6A4|1;SLC46A1|1;SDF2|1;SARM1|1;RNF135|1;POLDIP2|1;PIPOX|1;PIGS|1;NUFIP2|1;NSRP1|1;NLK|1;NF1|1;MYO18A|1;LYRM9|1;LOC101927018|1;KIAA0100|1;IFT20|1;GOSR1|1;GIT1|1;FLOT2|1;FAM222B|1;ERAL1|1;DHRS13|1;CRLF3|1;CPD|1;CORO6|1;BLMH|1;ATAD5|1;ANKRD13B|1;ALDOC|1;ABHD15|1;
UKB_23099_Body_fat_percentage|region1526	1	1	RPTOR|1;
UKB_23099_Body_fat_percentage|region1645	1	9	ZNFX1|1;SULF2|1;STAU1|1;PREX1|1;LINC01523|1;DDX27|1;CSE1L-AS1|1;CSE1L|1;ARFGEF2|1;
UKB_23099_Body_fat_percentage|region197	1	1	RGPD8|1;
UKB_23099_Body_fat_percentage|region286	1	3	HACL1|1;EAF1|1;BTD|1;
UKB_23099_Body_fat_percentage|region401	1	3	NOP14-AS1|1;NOP14|1;GRK4|1;
UKB_23099_Body_fat_percentage|region560	1	13	TAF9|1;SLC30A5|1;RAD17|1;PIK3R1|1;MRPS36|1;MAST4-AS1|1;MAST4|1;GTF2H2C_2|1;GTF2H2C|1;CENPH|1;CDK7|1;CCNB1|1;AK6|1;
UKB_23099_Body_fat_percentage|region563	1	12	SV2C|1;POLK|1;POC5|1;LOC441086|1;LINC01336|1;HMGCR|1;HEXB|1;FAM169A|1;ENC1|1;COL4A3BP|1;ANKRD31|1;ANKDD1B|1;
UKB_23099_Body_fat_percentage|region655	1	6	LY6G5B|1;GPANK1|1;CSNK2B|1;C6orf47|1;BAG6|1;APOM|1;
UKB_23099_Body_fat_percentage|region745	1	6	TMEM184A|1;SNX8|1;NUDT1|1;MRM2|1;MAD1L1|1;ELFN1-AS1|1;
UKB_23099_Body_fat_percentage|region918	1	2	TRPS1|1;LOC105375713|1;
UKB_23099_Body_fat_percentage|region923	1	1	RNU6-442P|1;
UKB_23099_Body_fat_percentage|region946	1	3	ZDHHC21|1;LOC389705|1;FREM1|1;
UKB_23099_Body_fat_percentage|region948	1	2	CNTLN|1;BNC2|1;
UKB_23099_Body_fat_percentage|region999	1	2	ZBTB34|1;RALGPS1|1;
UKB_2395_2_Hair_or_balding_pattern_Pattern_2|region1195	1	23	TM7SF3|1;STK38L|1;SSPN|1;RP11-283G6.5|1;RP11-283G6.4|1;RASSF8-AS1|1;RASSF8|1;PPFIBP1|1;MRPS35|1;MED21|1;MANSC4|1;LRMP|1;LMNTD1|1;LINC00477|1;KRAS|1;ITPR2|1;INTS13|1;FGFR1OP2|1;ETFRF1|1;CASC1|1;BHLHE41|1;BCAT1|1;ARNTL2|1;
UKB_2395_2_Hair_or_balding_pattern_Pattern_2|region238	1	8	TTC30B|1;OSBPL6|1;LOC105373764|1;LOC100130691|1;LNPK|1;LINC01117|1;HOXD8|1;AGPS|1;
UKB_2395_2_Hair_or_balding_pattern_Pattern_2|region346	1	8	ZDHHC23|1;ZBTB20-AS5|1;ZBTB20-AS4|1;ZBTB20-AS1|1;ZBTB20|1;SIDT1|1;GRAMD1C|1;DRD3|1;
UKB_2395_3_Hair_or_balding_pattern_Pattern_3|region1195	1	23	TM7SF3|1;STK38L|1;SSPN|1;RP11-283G6.5|1;RP11-283G6.4|1;RASSF8-AS1|1;RASSF8|1;PPFIBP1|1;MRPS35|1;MED21|1;MANSC4|1;LRMP|1;LMNTD1|1;LINC00477|1;KRAS|1;ITPR2|1;INTS13|1;FGFR1OP2|1;ETFRF1|1;CASC1|1;BHLHE41|1;BCAT1|1;ARNTL2|1;
UKB_2395_3_Hair_or_balding_pattern_Pattern_3|region175	1	8	MEIS1-AS3|1;MEIS1|1;LOC101927661|1;LINC01829|1;LINC01812|1;LINC01798|1;ETAA1|1;C1D|1;
UKB_2395_3_Hair_or_balding_pattern_Pattern_3|region636	1	4	RREB1|1;RIOK1|1;DSP|1;CAGE1|1;
UKB_2395_3_Hair_or_balding_pattern_Pattern_3|region700	1	4	PREP|1;PRDM1|1;POPDC3|1;HACE1|1;
UKB_2395_4_Hair_or_balding_pattern_Pattern_4|region103	1	5	SOX13|1;SNRPE|1;LINC00303|1;GOLT1A|1;ETNK2|1;
UKB_2395_4_Hair_or_balding_pattern_Pattern_4|region1195	1	23	TM7SF3|1;STK38L|1;SSPN|1;RP11-283G6.5|1;RP11-283G6.4|1;RASSF8-AS1|1;RASSF8|1;PPFIBP1|1;MRPS35|1;MED21|1;MANSC4|1;LRMP|1;LMNTD1|1;LINC00477|1;KRAS|1;ITPR2|1;INTS13|1;FGFR1OP2|1;ETFRF1|1;CASC1|1;BHLHE41|1;BCAT1|1;ARNTL2|1;
UKB_2395_4_Hair_or_balding_pattern_Pattern_4|region1563	1	2	SERPINB5|1;BCL2|1;
UKB_2395_4_Hair_or_balding_pattern_Pattern_4|region1668	1	1	CLIC6|1;
UKB_2395_4_Hair_or_balding_pattern_Pattern_4|region175	1	8	MEIS1-AS3|1;MEIS1|1;LOC101927661|1;LINC01829|1;LINC01812|1;LINC01798|1;ETAA1|1;C1D|1;
UKB_2395_4_Hair_or_balding_pattern_Pattern_4|region238	1	8	TTC30B|1;OSBPL6|1;LOC105373764|1;LOC100130691|1;LNPK|1;LINC01117|1;HOXD8|1;AGPS|1;
UKB_2395_4_Hair_or_balding_pattern_Pattern_4|region32	1	1	PODN|1;
UKB_2395_4_Hair_or_balding_pattern_Pattern_4|region466	1	9	TET2-AS1|1;TET2|1;RP11-556I14.1|1;PPA2|1;LOC101929577|1;INTS12|1;GSTCD|1;CXXC4-AS1|1;CXXC4|1;
UKB_2395_4_Hair_or_balding_pattern_Pattern_4|region742	1	1	FAM20C|1;
UKB_2395_4_Hair_or_balding_pattern_Pattern_4|region896	1	2	ZFHX4-AS1|1;ZFHX4|1;
UKB_50_Standing_height|region1	1	49	WRAP73|1;VWA1|1;UBE2J2|1;TPRG1L|1;TP73-AS1|1;TNFRSF4|1;TNFRSF14|1;TMEM52|1;TMEM240|1;SSU72|1;SLC35E2B|1;SKI|1;SDF4|1;SAMD11|1;RER1|1;PRKCZ|1;PLEKHN1|1;PLCH2|1;PEX10|1;PANK4|1;NOC2L|1;NADK|1;MRPL20|1;MORN1|1;MMP23B|1;MEGF6|1;LRRC47|1;LOC115110|1;LOC105378591|1;LOC100288069|1;LOC100129534|1;LINC01770|1;KLHL17|1;ISG15|1;HES5|1;HES4|1;GNB1|1;FAM213B|1;FAAP20|1;DFFB|1;CEP104|1;CDK11B|1;CDK11A|1;C1orf1…
UKB_50_Standing_height|region1041	1	10	WASHC2A|1;PRKG1-AS1|1;PRKG1|1;NCOA4|1;LOC102724719|1;FAM21EP|1;DKK1|1;CSTF2T|1;ASAH2B|1;A1CF|1;
UKB_50_Standing_height|region1047	1	1	SLC16A9|1;
UKB_50_Standing_height|region1059	1	1	PPIF|1;
UKB_50_Standing_height|region1082	1	1	GRK5|1;
UKB_50_Standing_height|region1086	1	26	ZRANB1|1;UROS|1;PSTK|1;OAT|1;MMP21|1;LOC399815|1;LOC283038|1;LHPP|1;IKZF5|1;FLJ37035|1;FANK1-AS1|1;FANK1|1;FAM53B-AS1|1;FAM53B|1;FAM24B-CUZD1|1;FAM24B|1;FAM175B|1;EEF1AKMT2|1;EDRF1-AS1|1;EDRF1|1;CTBP2|1;CHST15|1;C10orf88|1;BUB3|1;BCCIP|1;ACADSB|1;
UKB_50_Standing_height|region1091	1	14	STK32C|1;PWWP2B|1;PPP2R2D|1;LRRC27|1;LINC01168|1;LINC01167|1;LINC00959|1;KNDC1|1;JAKMIP3|1;INPP5A|1;GLRX3|1;CYP2E1|1;CFAP46|1;BNIP3|1;
UKB_50_Standing_height|region1103	1	2	RASSF10|1;LINC00958|1;
UKB_50_Standing_height|region12	1	5	NBL1|1;MINOS1-NBL1|1;MINOS1|1;LOC105378614|1;CAPZB|1;
UKB_50_Standing_height|region132	1	4	SH3YL1|1;FAM110C|1;ALKAL2|1;ACP1|1;
UKB_50_Standing_height|region1356	1	2	TGFB3|1;IFT43|1;
UKB_50_Standing_height|region1373	1	1	DLK1|1;
UKB_50_Standing_height|region1410	1	1	TLE3|1;
UKB_50_Standing_height|region1413	1	1	PSTPIP1|1;
UKB_50_Standing_height|region1467	1	1	ZFP1|1;
UKB_50_Standing_height|region1472	1	10	SDR42E1|1;PLCG2|1;MPHOSPH6|1;LOC100129617|1;LINC01227|1;GAN|1;DYNLRB2|1;CMIP|1;CDYL2|1;ATMIN|1;
UKB_50_Standing_height|region148	1	2	FOSL2|1;FLJ31356|1;
UKB_50_Standing_height|region1490	1	8	TMEM220-AS1|1;TMEM220|1;MYHAS|1;MYH8|1;MYH2|1;MAP2K4|1;GAS7|1;DHRS7C|1;
UKB_50_Standing_height|region1496	1	21	TOP3A|1;TOM1L2|1;SMCR8|1;SLC5A10|1;SHMT1|1;RASD1|1;PRPSAP2|1;PEMT|1;MIEF2|1;MED9|1;LLGL1|1;LINC02076|1;GID4|1;FLII|1;FLCN|1;FAM83G|1;EPN2|1;DRG2|1;DRC3|1;ATPAF2|1;ALKBH5|1;
UKB_50_Standing_height|region1515	1	29	VEZF1|1;TSPOAP1-AS1|1;TSPOAP1|1;TRIM37|1;TRIM25|1;TEX14|1;SUPT4H1|1;SRSF1|1;SMG8|1;SEPT4-AS1|1;SCPEP1|1;RNF43|1;RAD51C|1;PPM1E|1;NOG|1;MTVR2|1;MTMR4|1;MSI2|1;MRPS23|1;MKS1|1;LOC101927666|1;LOC101927557|1;LOC101927539|1;DYNLL2|1;DGKE|1;CUEDC1|1;COIL|1;C17orf67|1;AKAP1|1;
UKB_50_Standing_height|region1663	1	3	LINC00113|1;ADAMTS5|1;ADAMTS1|1;
UKB_50_Standing_height|region167	1	1	CCDC88A|1;
UKB_50_Standing_height|region185	1	3	VAMP8|1;VAMP5|1;GGCX|1;
UKB_50_Standing_height|region191	1	10	TMEM182|1;SLC9A4|1;SLC9A2|1;MFSD9|1;LINC01796|1;LINC01127|1;IL1RL1|1;IL1R2|1;IL18RAP|1;IL18R1|1;
UKB_50_Standing_height|region23	1	1	BMP8A|1;
UKB_50_Standing_height|region249	1	2	FTCDNL1|1;C2orf69|1;
UKB_50_Standing_height|region28	1	3	LINC01389|1;FOXD2-AS1|1;FOXD2|1;
UKB_50_Standing_height|region314	1	2	FAM208A|1;CCDC66|1;
UKB_50_Standing_height|region428	1	4	TLR1|1;LINC01258|1;KLF3-AS1|1;KLF3|1;
UKB_50_Standing_height|region438	1	5	REST|1;POLR2B|1;NOA1|1;CEP135|1;ARL9|1;
UKB_50_Standing_height|region476	1	5	TMEM155|1;EXOSC9|1;CCNA2|1;BBS7|1;ANXA5|1;
UKB_50_Standing_height|region6	1	14	UBE4B|1;PIK3CD-AS2|1;PIK3CD|1;PGD|1;PEX14|1;NMNAT1|1;LZIC|1;KIF1B|1;DFFA|1;CTNNBIP1|1;CLSTN1|1;CENPS|1;CASZ1|1;APITD1-CORT|1;
UKB_50_Standing_height|region601	1	7	UBE2D2|1;TMEM173|1;PSD2-AS1|1;PSD2|1;ECSCR|1;DNAJC18|1;CXXC5|1;
UKB_50_Standing_height|region621	1	4	RANBP17|1;NPM1|1;LINC01366|1;FGF18|1;
UKB_50_Standing_height|region631	1	1	FOXCUT|1;
UKB_50_Standing_height|region699	1	2	LIN28B-AS1|1;HACE1|1;
UKB_50_Standing_height|region706	1	22	ZUFSP|1;VGLL2|1;TSPYL4|1;TSPYL1|1;RWDD1|1;RSPH4A|1;ROS1|1;NUS1|1;NT5DC1|1;LOC101927919|1;KPNA5|1;GOPC|1;FRK|1;FAM26E|1;FAM26D|1;FAM184A|1;FAM162B|1;DSE|1;DCBLD1|1;CEP85L|1;BRD7P3|1;ASF1A|1;
UKB_50_Standing_height|region714	1	8	TMEM244|1;TMEM200A|1;PTPRK|1;LAMA2|1;L3MBTL3|1;EPB41L2|1;ARHGAP18|1;AKAP7|1;
UKB_50_Standing_height|region727	1	14	ZBTB2|1;ULBP3|1;ULBP2|1;SYNE1-AS1|1;SYNE1|1;RMND1|1;RAET1K|1;PLEKHG1|1;MYCT1|1;MTHFD1L|1;IYD|1;CCDC170|1;ARMT1|1;AKAP12|1;
UKB_50_Standing_height|region730	1	5	TIAM2|1;TFB1M|1;SCAF8|1;RP11-477D19.2|1;CLDN20|1;
UKB_50_Standing_height|region745	1	1	AMZ1|1;
UKB_50_Standing_height|region762	1	6	TRA2A|1;RPS2P32|1;NUPL2|1;MALSU1|1;IGF2BP3|1;CCDC126|1;
UKB_50_Standing_height|region773	1	1	GCK|1;
UKB_50_Standing_height|region788	1	1	METTL27|1;
UKB_50_Standing_height|region797	1	3	FAM133DP|1;FAM133B|1;CDK6|1;
UKB_50_Standing_height|region815	1	4	FEZF1-AS1|1;FEZF1|1;CADPS2|1;AASS|1;
UKB_50_Standing_height|region947	1	7	ZDHHC21|1;SNAPC3|1;SH3GL2|1;PSIP1|1;CNTLN|1;CCDC171|1;BNC2|1;
UKB_50_Standing_height|region979	1	1	SPIN1|1;
UKB_50_Standing_height|region981	1	11	ZNF484|1;SPTLC1|1;NOL8|1;LOC101929748|1;LOC100128361|1;LINC00475|1;IPPK|1;IARS|1;CENPP|1;BICD2|1;ANKRD19P|1;
UKB_6150_1_Vascular_or_heart_problems_diagnosed_by_doctor_Heart_attack|region950	1	17	MTAP|1;MLLT3|1;MIR31HG|1;LINC01239|1;KLHL9|1;IFNW1|1;IFNE|1;IFNA2|1;HACD4|1;FOCAD-AS1|1;FOCAD|1;ELAVL2|1;DMRTA1|1;CDKN2B-AS1|1;CDKN2B|1;CDKN2A-AS1|1;CDKN2A|1;
UKB_6152_8_diagnosed_by_doctor_Asthma|region1135	1	10	TSKU|1;THAP12|1;MYO7A|1;LRRC32|1;LOC101928837|1;LOC100506127|1;GUCY2EP|1;GDPD4|1;EMSY|1;AQP11|1;
UKB_6152_8_diagnosed_by_doctor_Asthma|region1164	1	1	CXCR5|1;
UKB_6152_8_diagnosed_by_doctor_Asthma|region1251	1	17	XLOC_009911|1;UNC119B|1;SRSF9|1;SPPL3|1;POP5|1;P2RX7|1;P2RX4|1;ORAI1|1;OASL|1;MLEC|1;HNF1A-AS1|1;COX6A1|1;CIT|1;CAMKK2|1;C12orf43|1;BICDL1|1;ACADS|1;
UKB_6152_8_diagnosed_by_doctor_Asthma|region1353	1	15	ZFYVE26|1;ZFP36L1|1;VTI1B|1;TMEM229B|1;RAD51B|1;PLEKHH1|1;PLEK2|1;PIGH|1;MPP5|1;LOC100996664|1;FAM71D|1;EXD2|1;ARG2|1;ACTN1-AS1|1;ACTN1|1;
UKB_6152_8_diagnosed_by_doctor_Asthma|region137	1	2	LINC00299|1;ID2|1;
UKB_6152_8_diagnosed_by_doctor_Asthma|region396	1	8	WDR53|1;SDHAP1|1;PIGX|1;PAK2|1;NRROS|1;LINC01063|1;FBXO45|1;CEP19|1;
UKB_6152_8_diagnosed_by_doctor_Asthma|region428	1	2	TLR6|1;FAM114A1|1;
UKB_6152_8_diagnosed_by_doctor_Asthma|region543	1	1	IL7R|1;
UKB_6152_8_diagnosed_by_doctor_Asthma|region656	1	1	HLA-DMA|1;
UKB_6152_8_diagnosed_by_doctor_Asthma|region657	1	3	ZNF76|1;TCP11|1;DEF6|1;
UKB_6152_8_diagnosed_by_doctor_Asthma|region690	1	13	UBE2J1|1;RRAGD|1;RNGTT|1;PM20D2|1;MDN1|1;MAP3K7|1;LYRM2|1;LOC101929057|1;GJA10|1;GABRR2|1;CASP8AP2|1;BACH2|1;ANKRD6|1;
UKB_6152_8_diagnosed_by_doctor_Asthma|region710	1	8	TBC1D32|1;SMPDL3A|1;SERINC1|1;PKIB|1;HSF2|1;GJA1|1;FABP7|1;CLVS2|1;
UKB_6152_8_diagnosed_by_doctor_Asthma|region761	1	5	STEAP1B|1;LOC541472|1;LOC100506178|1;IL6|1;AC073072.5|1;
UKB_6152_8_diagnosed_by_doctor_Asthma|region897	1	19	ZNF704|1;ZFAND1|1;ZC2HC1A|1;ZBTB10|1;TPD52|1;STMN2|1;SNX16|1;RNU6-1213P|1;PAG1|1;MRPS28|1;LOC101927040|1;LINC01607|1;IMPA1|1;IL7|1;HEY1|1;FABP5|1;FABP4|1;FABP12|1;CHMP4C|1;
UKB_6152_8_diagnosed_by_doctor_Asthma|region940	1	1	IL33|1;
UKB_6152_9_diagnosed_by_doctor_Hayfever_allergic_rhinitis_or_eczema|region1172	1	13	TP53AIP1|1;TMEM45B|1;SENCR|1;LOC399975|1;LOC101929538|1;LOC101929517|1;KCNJ5|1;KCNJ1|1;FLI1|1;ETS1|1;C11orf45|1;ARHGAP32|1;APLP2|1;
UKB_6152_9_diagnosed_by_doctor_Hayfever_allergic_rhinitis_or_eczema|region1244	1	5	FAM109A|1;BRAP|1;ATXN2|1;ALDH2|1;ACAD10|1;
UKB_6152_9_diagnosed_by_doctor_Hayfever_allergic_rhinitis_or_eczema|region1252	1	5	PSMD9|1;MLXIP|1;LOC100506691|1;BCL7A|1;AC156455.1|1;
UKB_6152_9_diagnosed_by_doctor_Hayfever_allergic_rhinitis_or_eczema|region1353	1	15	ZFYVE26|1;ZFP36L1|1;VTI1B|1;TMEM229B|1;RAD51B|1;PLEKHH1|1;PLEK2|1;PIGH|1;MPP5|1;LOC100996664|1;FAM71D|1;EXD2|1;ARG2|1;ACTN1-AS1|1;ACTN1|1;
UKB_6152_9_diagnosed_by_doctor_Hayfever_allergic_rhinitis_or_eczema|region137	1	2	LINC00299|1;ID2|1;
UKB_6152_9_diagnosed_by_doctor_Hayfever_allergic_rhinitis_or_eczema|region1438	1	4	SOCS1|1;RMI2|1;LOC105371083|1;ATF7IP2|1;
UKB_6152_9_diagnosed_by_doctor_Hayfever_allergic_rhinitis_or_eczema|region1508	1	2	SPATA32|1;MAP3K14-AS1|1;
UKB_6152_9_diagnosed_by_doctor_Hayfever_allergic_rhinitis_or_eczema|region1531	1	2	DLGAP1-AS3|1;DLGAP1|1;
UKB_6152_9_diagnosed_by_doctor_Hayfever_allergic_rhinitis_or_eczema|region16	1	1	RUNX3|1;
UKB_6152_9_diagnosed_by_doctor_Hayfever_allergic_rhinitis_or_eczema|region1653	1	30	ZNF512B|1;ZGPAT|1;ZBTB46|1;UCKL1|1;TPD52L2|1;TNFRSF6B|1;TCEA2|1;STMN3|1;SRMS|1;SAMD10|1;RTEL1-TNFRSF6B|1;RTEL1|1;RGS19|1;PTK6|1;PRPF6|1;PPDPF|1;OPRL1|1;MHENCR|1;LKAAEAR1|1;LIME1|1;KCNQ2|1;HELZ2|1;GMEB2|1;FNDC11|1;EEF1A2|1;DNAJC5|1;CHRNA4|1;BIRC7|1;ARFRP1|1;ABHD16B|1;
UKB_6152_9_diagnosed_by_doctor_Hayfever_allergic_rhinitis_or_eczema|region21	1	2	ZMYM4|1;SFPQ|1;
UKB_6152_9_diagnosed_by_doctor_Hayfever_allergic_rhinitis_or_eczema|region265	1	5	MFF|1;LOC654841|1;DAW1|1;CCL20|1;AGFG1|1;
UKB_6152_9_diagnosed_by_doctor_Hayfever_allergic_rhinitis_or_eczema|region275	1	2	GAL3ST2|1;D2HGDH|1;
UKB_6152_9_diagnosed_by_doctor_Hayfever_allergic_rhinitis_or_eczema|region390	1	21	TPRG1-AS1|1;TPRG1|1;RTP4|1;RTP2|1;RPL39L|1;MASP1|1;LPP-AS2|1;LPP-AS1|1;LPP|1;LOC101929130|1;LOC101929106|1;LOC100131635|1;LINC02052|1;LINC01991|1;KNG1|1;HRG|1;FLJ42393|1;FETUB|1;CRYGS|1;BCL6|1;ADIPOQ|1;
UKB_6152_9_diagnosed_by_doctor_Hayfever_allergic_rhinitis_or_eczema|region403	1	1	LOC101928279|1;
UKB_6152_9_diagnosed_by_doctor_Hayfever_allergic_rhinitis_or_eczema|region428	1	2	TLR6|1;FAM114A1|1;
UKB_6152_9_diagnosed_by_doctor_Hayfever_allergic_rhinitis_or_eczema|region546	1	1	PTGER4|1;
UKB_6152_9_diagnosed_by_doctor_Hayfever_allergic_rhinitis_or_eczema|region598	1	36	ZCCHC10|1;VDAC1|1;UQCRQ|1;TH2LCRR|1;SOWAHA|1;SLC22A5|1;SLC22A4|1;SKP1|1;SHROOM1|1;SEPT8|1;RAPGEF6|1;RAD50|1;PDLIM4|1;P4HA2-AS1|1;P4HA2|1;MEIKIN|1;LYRM7|1;LOC553103|1;LOC105379183|1;LOC105379176|1;LEAP2|1;KIF3A|1;IRF1|1;IL4|1;IL13|1;HSPA4|1;HINT1|1;GDF9|1;FNIP1|1;CSF2|1;CDC42SE2|1;CCNI2|1;C5orf56|1;C5orf15|1;AFF4|1;ACSL6|1;
UKB_6152_9_diagnosed_by_doctor_Hayfever_allergic_rhinitis_or_eczema|region613	1	1	MIR3142HG|1;
UKB_6152_9_diagnosed_by_doctor_Hayfever_allergic_rhinitis_or_eczema|region649	1	8	U91328.19|1;LOC108783645|1;HIST1H4C|1;HIST1H3C|1;HIST1H2BB|1;HIST1H2APS5|1;HIST1H1C|1;HFE|1;
UKB_6152_9_diagnosed_by_doctor_Hayfever_allergic_rhinitis_or_eczema|region653	1	5	NRM|1;MDC1|1;IER3|1;FLOT1|1;DHX16|1;
UKB_6152_9_diagnosed_by_doctor_Hayfever_allergic_rhinitis_or_eczema|region654	1	64	ZNRD1ASP|1;ZNRD1|1;ZFP57|1;VARS2|1;UBD|1;TUBB|1;TRIM39|1;TRIM26|1;TRIM15|1;TNF|1;TCF19|1;SLC44A4|1;SFTA2|1;RPP21|1;RNF39|1;PSORS1C1|1;PRR3|1;PPP1R18|1;PPP1R11|1;PPP1R10|1;NRM|1;MUC22|1;MUC21|1;MRPS18B|1;MICB|1;MICA|1;MDC1|1;LOC554223|1;LOC105375014|1;LINC01149|1;LINC00243|1;IER3|1;HLA-L|1;HLA-J|1;HLA-H|1;HLA-F-AS1|1;HLA-F|1;HLA-E|1;HLA-C|1;HLA-B|1;HLA-A|1;HCP5|1;HCG9|1;HCG4B|1;HCG4|1;HCG27|1;HCG2…
UKB_6152_9_diagnosed_by_doctor_Hayfever_allergic_rhinitis_or_eczema|region82	1	1	CD247|1;
UKB_6152_9_diagnosed_by_doctor_Hayfever_allergic_rhinitis_or_eczema|region85	1	18	TNFSF4|1;TNFSF18|1;SUCO|1;SLC9C2|1;RP3-395P12.2|1;PRDX6|1;PIGC|1;LOC730159|1;LOC102724601|1;LOC101928696|1;LOC100506023|1;KLHL20|1;GAS5-AS1|1;FASLG|1;DNM3|1;DARS2|1;CENPL|1;ANKRD45|1;
UKB_6152_9_diagnosed_by_doctor_Hayfever_allergic_rhinitis_or_eczema|region948	1	2	CNTLN|1;BNC2|1;
