# Supplementary material for: Genetic regulation of DNA methylation across tissues reveals thousands of molecular links to complex traits
Source: Research Square preprint supplement (doi:10.21203/rs.3.rs-492596/v1), 2021-05-11
Supplement: Supplementary file 7 [file ac94f7ee59a85a7a66674a1e.xlsx]

## Sheet: README
Supplementary Table 3 - mQTL enrichment in functional annotations
Sheet: Annotation sources
Column	Description
A	Genomic functional annotation type
B	Source of (A) annotations
C	Analyzed features of (A)
D	Brief description of (A) annotations
Enrichment results
Sheets: ${Annotation type} Single Tissue
Per-tissue torus enrichment analysis
Column	Description
A	QTL type
B	QTL Tissue
C	Functional annotation feature
D	Enrichment (log odds ratio)
E	Lower 95% confidence interval of (C)
F	Upper 95% confidence interval of (C)
Sheets: ${Annotation type} Across Tissues
Across-tissues torus enrichment meta-analysis
Column	Description
A	QTL type
B	Functional annotation feature
C	Enrichment (log odds ratio)
D	Standard error of (C)
E	Random-effect meta-analysis statistic
F	P-value of (E)
G	Lower 95% confidence interval of (C)
H	Upper 95% confidence interval of (C)
I	I²: percentage of enrichment variation across tissues that is due to heterogeneity rather than chance
J	P-value of Cochran’s Q: Significance of across-tissue enrichment heterogeneity
K	Bonferroni-adjusted (F)
L	Percent of across-tissues (mCpG/eGene) top QTL variants overlapping (B) regions

## Sheet: Annotation Sources
Annotation type	Source	Feature list (original source nomenclature)	Comments
Gene Regulatory regions	ENCODE (version 5)	CTCF-only,dELS,pELS,PLS	Candidate cis-regulatory elements. Obtained from ENCODE website, build hg38.
Gene Body regions	Ensembl (build 102)	start_retained_variant,protein_altering_variant,incomplete_terminal_codon_variant,stop_retained_variant,coding_sequence_variant,stop_lost,start_lost,inframe_insertion,stop_gained,inframe_deletion,splice_acceptor_variant,frameshift_variant,splice_donor_variant,splice_region_variant,5_prime_UTR_variant,missense_variant,synonymous_variant,3_prime_UTR_variant,non_coding_transcript_exon_variant,intron…	Predicted gene body regions and variant functional effects. Obtained from Ensembl ftpsite, build hg38. Collapsed annotations: splice region, acceptor and donor sites were collapsed to ‘splice’ and coding sequence sites to ‘CDS’.
Transcription Factor (TF) binding sites	ENCODE (version 2,3)	AFF1,AGO1,AGO2,ARHGAP35,ARID1B,ARID2,ARID3A,ARNT,ASH1L,ASH2L,ATF2,ATF3,ATF4,ATF7,ATM,BACH1,BATF,BCL11A,BCL3,BCOR,BHLHE40,BMI1,BRCA1,BRD4,BRD9,C11orf30,CBFA2T2,CBFA2T3,CBFB,CBX1,CBX2,CBX3,CBX5,CBX8,CC2D1A,CCAR2,CDC5L,CEBPB,CHAMP1,CHD1,CHD4,CHD7,CLOCK,COPS2,CREB1,CREB3L1,CREBBP,CREM,CTBP1,CTCF,CUX1,DACH1,DEAF1,DNMT1,DPF2,E2F1,E2F4,E2F6,E2F7,E2F8,E4F1,EBF1,EED,EGR1,EHMT2,ELF1,ELF4,ELK1,EP300,EP400,E…	Experimentally defined TF binding sites, based on ENCODE ChipSeq data peaks compiled across cell types. Obtained from UCSC table browser build hg38. RBM17 was excluded due to low coverage.
Open Chromatin	ENCODE (version 5)	-	DNAse-seq profiles matching QTL-mapping tissue. Obtained from ENCODE website, build hg38.
Chromatin states	ROADMAP	TssA,TssFlnk,TssFlnkU,TssFlnkD,Tx,TxWk,EnhG1,EnhG2,EnhA1,EnhA2,EnhWk,ZNF/Rpts	ROADMAP predicted chromatin states, based on epigenetic marks. Active chromatin states were selected.
CpG Islands (CGI)	UCSC	CpG	Predicted CGI regions. Obtained from UCSC table browser build hg38

## Sheet: Gene Body and Regulatory, CGIs 
qtl	tissue	feature	logOR	logORcil	logORciu
mqtls	Breast	cpgIsland.1	-0.143	-0.35	0.064
mqtls	Breast	cpgIslandShore.1	0.053	-0.124	0.231
mqtls	Breast	cpgIslandShelf.1	-0.073	-0.331	0.186
mqtls	Breast	CTCF.1	1.078	0.233	1.924
mqtls	Breast	enhD.1	0.979	0.815	1.144
mqtls	Breast	enhP.1	0.302	0.056	0.548
mqtls	Breast	prom.1	0.67	0.394	0.945
mqtls	Breast	splice.1	-0.019	-0.909	0.871
mqtls	Breast	5_prime_UTR_variant.1	-0.472	-0.852	-0.092
mqtls	Breast	3_prime_UTR_variant.1	0.41	0.034	0.787
mqtls	Breast	intron_variant.1	0.049	-0.036	0.134
mqtls	Breast	non_coding_transcript_exon_variant.1	-0.144	-0.391	0.103
mqtls	Breast	coding_sequence_variant.1	-0.088	-0.943	0.767
mqtls	Colon	cpgIsland.1	-0.358	-0.458	-0.258
mqtls	Colon	cpgIslandShore.1	-0.037	-0.115	0.04
mqtls	Colon	cpgIslandShelf.1	0.007	-0.09	0.104
mqtls	Colon	CTCF.1	1.033	0.603	1.463
mqtls	Colon	enhD.1	0.839	0.751	0.928
mqtls	Colon	enhP.1	0.482	0.364	0.6
mqtls	Colon	prom.1	0.835	0.696	0.973
mqtls	Colon	splice.1	0.141	-0.382	0.664
mqtls	Colon	5_prime_UTR_variant.1	-0.24	-0.406	-0.075
mqtls	Colon	3_prime_UTR_variant.1	0.132	-0.076	0.34
mqtls	Colon	intron_variant.1	-0.07	-0.112	-0.028
mqtls	Colon	non_coding_transcript_exon_variant.1	-0.141	-0.261	-0.021
mqtls	Colon	coding_sequence_variant.1	-0.011	-0.206	0.183
mqtls	Kidney	cpgIsland.1	-0.416	-0.595	-0.237
mqtls	Kidney	cpgIslandShore.1	0.001	-0.15	0.151
mqtls	Kidney	cpgIslandShelf.1	-0.121	-0.316	0.074
mqtls	Kidney	CTCF.1	1.069	0.385	1.752
mqtls	Kidney	enhD.1	0.944	0.802	1.086
mqtls	Kidney	enhP.1	0.115	-0.131	0.36
mqtls	Kidney	prom.1	0.936	0.697	1.176
mqtls	Kidney	splice.1	-0.185	-1.348	0.978
mqtls	Kidney	5_prime_UTR_variant.1	-0.445	-0.745	-0.145
mqtls	Kidney	3_prime_UTR_variant.1	-0.006	-0.336	0.325
mqtls	Kidney	intron_variant.1	-0.017	-0.094	0.06
mqtls	Kidney	non_coding_transcript_exon_variant.1	-0.187	-0.404	0.03
mqtls	Kidney	coding_sequence_variant.1	-0.103	-0.533	0.327
mqtls	Lung	cpgIsland.1	-0.449	-0.549	-0.349
mqtls	Lung	cpgIslandShore.1	-0.032	-0.108	0.043
mqtls	Lung	cpgIslandShelf.1	-0.115	-0.224	-0.006
mqtls	Lung	CTCF.1	0.923	0.489	1.357
mqtls	Lung	enhD.1	0.871	0.787	0.955
mqtls	Lung	enhP.1	0.52	0.408	0.633
mqtls	Lung	prom.1	0.764	0.625	0.903
mqtls	Lung	splice.1	0.183	-0.292	0.658
mqtls	Lung	5_prime_UTR_variant.1	-0.133	-0.296	0.03
mqtls	Lung	3_prime_UTR_variant.1	0.1	-0.102	0.302
mqtls	Lung	intron_variant.1	-0.012	-0.055	0.031
mqtls	Lung	non_coding_transcript_exon_variant.1	-0.148	-0.265	-0.03
mqtls	Lung	coding_sequence_variant.1	-0.135	-0.351	0.082
mqtls	Muscle	cpgIsland.1	-0.246	-0.421	-0.07
mqtls	Muscle	cpgIslandShore.1	0.051	-0.092	0.195
mqtls	Muscle	cpgIslandShelf.1	-0.099	-0.291	0.093
mqtls	Muscle	CTCF.1	1.226	0.532	1.921
mqtls	Muscle	enhD.1	0.817	0.671	0.964
mqtls	Muscle	enhP.1	0.122	-0.126	0.369
mqtls	Muscle	prom.1	0.982	0.755	1.21
mqtls	Muscle	splice.1	0.168	-1.135	1.471
mqtls	Muscle	5_prime_UTR_variant.1	-0.478	-0.768	-0.189
mqtls	Muscle	3_prime_UTR_variant.1	0.204	-0.16	0.568
mqtls	Muscle	intron_variant.1	-0.191	-0.258	-0.125
mqtls	Muscle	non_coding_transcript_exon_variant.1	-0.126	-0.343	0.091
mqtls	Muscle	coding_sequence_variant.1	-0.561	-0.993	-0.13
mqtls	Ovary	cpgIsland.1	-0.472	-0.586	-0.357
mqtls	Ovary	cpgIslandShore.1	-0.106	-0.188	-0.025
mqtls	Ovary	cpgIslandShelf.1	-0.012	-0.112	0.088
mqtls	Ovary	CTCF.1	1.032	0.589	1.475
mqtls	Ovary	enhD.1	0.763	0.671	0.854
mqtls	Ovary	enhP.1	0.309	0.178	0.44
mqtls	Ovary	prom.1	0.571	0.411	0.731
mqtls	Ovary	splice.1	0.034	-0.553	0.621
mqtls	Ovary	5_prime_UTR_variant.1	-0.337	-0.533	-0.141
mqtls	Ovary	3_prime_UTR_variant.1	0.293	0.09	0.495
mqtls	Ovary	intron_variant.1	-0.041	-0.085	0.003
mqtls	Ovary	non_coding_transcript_exon_variant.1	-0.139	-0.269	-0.009
mqtls	Ovary	coding_sequence_variant.1	0.004	-0.194	0.202
mqtls	Prostate	cpgIsland.1	-0.425	-0.557	-0.293
mqtls	Prostate	cpgIslandShore.1	-0.056	-0.158	0.046
mqtls	Prostate	cpgIslandShelf.1	-0.003	-0.12	0.113
mqtls	Prostate	CTCF.1	0.988	0.396	1.579
mqtls	Prostate	enhD.1	0.873	0.76	0.985
mqtls	Prostate	enhP.1	0.518	0.369	0.667
mqtls	Prostate	prom.1	0.662	0.474	0.85
mqtls	Prostate	splice.1	0.477	-0.134	1.087
mqtls	Prostate	5_prime_UTR_variant.1	-0.188	-0.411	0.035
mqtls	Prostate	3_prime_UTR_variant.1	0.212	-0.053	0.478
mqtls	Prostate	intron_variant.1	-0.033	-0.09	0.025
mqtls	Prostate	non_coding_transcript_exon_variant.1	-0.099	-0.261	0.062
mqtls	Prostate	coding_sequence_variant.1	-0.238	-0.529	0.053
mqtls	Testis	cpgIsland.1	-0.112	-0.343	0.119
mqtls	Testis	cpgIslandShore.1	-0.103	-0.281	0.076
mqtls	Testis	cpgIslandShelf.1	0.134	-0.095	0.363
mqtls	Testis	CTCF.1	1.109	0.187	2.031
mqtls	Testis	enhD.1	0.833	0.658	1.007
mqtls	Testis	enhP.1	0.172	-0.125	0.47
mqtls	Testis	prom.1	0.564	0.264	0.864
mqtls	Testis	splice.1	0.545	-0.405	1.495
mqtls	Testis	5_prime_UTR_variant.1	-0.301	-0.671	0.07
mqtls	Testis	3_prime_UTR_variant.1	0.23	-0.18	0.641
mqtls	Testis	intron_variant.1	-0.086	-0.169	-0.004
mqtls	Testis	non_coding_transcript_exon_variant.1	-0.051	-0.515	0.413
mqtls	Testis	coding_sequence_variant.1	-0.303	-0.769	0.163
mqtls	WholeBlood	cpgIsland.1	-0.373	-0.566	-0.18
mqtls	WholeBlood	cpgIslandShore.1	-0.123	-0.272	0.026
mqtls	WholeBlood	cpgIslandShelf.1	-0.03	-0.225	0.165
mqtls	WholeBlood	CTCF.1	0.556	-0.452	1.564
mqtls	WholeBlood	enhD.1	0.806	0.646	0.966
mqtls	WholeBlood	enhP.1	0.5	0.274	0.727
mqtls	WholeBlood	prom.1	0.638	0.363	0.913
mqtls	WholeBlood	splice.1	0.712	-0.02	1.445
mqtls	WholeBlood	5_prime_UTR_variant.1	-0.215	-0.557	0.126
mqtls	WholeBlood	3_prime_UTR_variant.1	0.132	-0.341	0.605
mqtls	WholeBlood	intron_variant.1	0.084	0.008	0.16
mqtls	WholeBlood	non_coding_transcript_exon_variant.1	-0.329	-0.569	-0.089
mqtls	WholeBlood	coding_sequence_variant.1	0.068	-1.34	1.476
eqtls	Breast	cpgIsland.1	0.423	0.342	0.504
eqtls	Breast	cpgIslandShore.1	0.057	-0.013	0.127
eqtls	Breast	cpgIslandShelf.1	-0.226	-0.318	-0.134
eqtls	Breast	CTCF.1	-0.21	-1.202	0.781
eqtls	Breast	enhD.1	0.306	0.17	0.442
eqtls	Breast	enhP.1	0.526	0.418	0.633
eqtls	Breast	prom.1	1.051	0.946	1.156
eqtls	Breast	splice.1	1.103	0.852	1.353
eqtls	Breast	5_prime_UTR_variant.1	0.537	0.426	0.647
eqtls	Breast	3_prime_UTR_variant.1	1.218	1.082	1.355
eqtls	Breast	intron_variant.1	0.428	0.392	0.464
eqtls	Breast	non_coding_transcript_exon_variant.1	0.702	0.624	0.781
eqtls	Breast	coding_sequence_variant.1	0.441	0.294	0.587
eqtls	Colon	cpgIsland.1	0.349	0.269	0.43
eqtls	Colon	cpgIslandShore.1	-0.024	-0.105	0.057
eqtls	Colon	cpgIslandShelf.1	-0.137	-0.226	-0.047
eqtls	Colon	CTCF.1	-0.855	-1.939	0.229
eqtls	Colon	enhD.1	0.419	0.289	0.55
eqtls	Colon	enhP.1	0.523	0.414	0.633
eqtls	Colon	prom.1	1.147	1.042	1.252
eqtls	Colon	splice.1	0.954	0.695	1.214
eqtls	Colon	5_prime_UTR_variant.1	0.491	0.379	0.604
eqtls	Colon	3_prime_UTR_variant.1	1.251	1.115	1.386
eqtls	Colon	intron_variant.1	0.511	0.476	0.547
eqtls	Colon	non_coding_transcript_exon_variant.1	0.66	0.58	0.74
eqtls	Colon	coding_sequence_variant.1	0.425	0.274	0.575
eqtls	Kidney	cpgIsland.1	0.011	-0.119	0.142
eqtls	Kidney	cpgIslandShore.1	-0.141	-0.307	0.025
eqtls	Kidney	cpgIslandShelf.1	-0.12	-0.322	0.081
eqtls	Kidney	CTCF.1	0.368	-1.284	2.02
eqtls	Kidney	enhD.1	0.206	-0.096	0.508
eqtls	Kidney	enhP.1	0.155	-0.132	0.441
eqtls	Kidney	prom.1	1.074	0.862	1.287
eqtls	Kidney	splice.1	1.262	0.726	1.799
eqtls	Kidney	5_prime_UTR_variant.1	0.446	0.211	0.682
eqtls	Kidney	3_prime_UTR_variant.1	0.967	0.637	1.296
eqtls	Kidney	intron_variant.1	0.401	0.322	0.48
eqtls	Kidney	non_coding_transcript_exon_variant.1	0.869	0.696	1.041
eqtls	Kidney	coding_sequence_variant.1	0.35	0.005	0.695
eqtls	Lung	cpgIsland.1	0.233	0.158	0.308
eqtls	Lung	cpgIslandShore.1	-0.045	-0.111	0.021
eqtls	Lung	cpgIslandShelf.1	-0.126	-0.206	-0.047
eqtls	Lung	CTCF.1	0.432	-0.2	1.063
eqtls	Lung	enhD.1	0.673	0.566	0.78
eqtls	Lung	enhP.1	0.652	0.551	0.753
eqtls	Lung	prom.1	1.244	1.144	1.344
eqtls	Lung	splice.1	0.909	0.67	1.147
eqtls	Lung	5_prime_UTR_variant.1	0.398	0.29	0.506
eqtls	Lung	3_prime_UTR_variant.1	1.044	0.918	1.17
eqtls	Lung	intron_variant.1	0.458	0.427	0.49
eqtls	Lung	non_coding_transcript_exon_variant.1	0.61	0.536	0.684
eqtls	Lung	coding_sequence_variant.1	0.478	0.342	0.615
eqtls	Muscle	cpgIsland.1	0.398	0.341	0.455
eqtls	Muscle	cpgIslandShore.1	-0.044	-0.1	0.012
eqtls	Muscle	cpgIslandShelf.1	-0.228	-0.297	-0.158
eqtls	Muscle	CTCF.1	-0.574	-1.349	0.202
eqtls	Muscle	enhD.1	0.58	0.483	0.677
eqtls	Muscle	enhP.1	0.621	0.539	0.703
eqtls	Muscle	prom.1	1.242	1.167	1.316
eqtls	Muscle	splice.1	1.2	1.023	1.377
eqtls	Muscle	5_prime_UTR_variant.1	0.533	0.452	0.614
eqtls	Muscle	3_prime_UTR_variant.1	1.198	1.097	1.299
eqtls	Muscle	intron_variant.1	0.387	0.359	0.414
eqtls	Muscle	non_coding_transcript_exon_variant.1	0.522	0.465	0.579
eqtls	Muscle	coding_sequence_variant.1	0.323	0.211	0.435
eqtls	Ovary	cpgIsland.1	0.538	0.456	0.619
eqtls	Ovary	cpgIslandShore.1	0.031	-0.057	0.118
eqtls	Ovary	cpgIslandShelf.1	-0.268	-0.373	-0.162
eqtls	Ovary	CTCF.1	-0.588	-1.699	0.522
eqtls	Ovary	enhD.1	0.206	0.046	0.367
eqtls	Ovary	enhP.1	0.303	0.175	0.432
eqtls	Ovary	prom.1	1.211	1.111	1.311
eqtls	Ovary	splice.1	1.767	1.558	1.976
eqtls	Ovary	5_prime_UTR_variant.1	0.428	0.316	0.539
eqtls	Ovary	3_prime_UTR_variant.1	0.95	0.791	1.109
eqtls	Ovary	intron_variant.1	0.315	0.276	0.354
eqtls	Ovary	non_coding_transcript_exon_variant.1	0.751	0.672	0.83
eqtls	Ovary	coding_sequence_variant.1	0.405	0.247	0.562
eqtls	Prostate	cpgIsland.1	0.371	0.296	0.447
eqtls	Prostate	cpgIslandShore.1	0.061	-0.012	0.133
eqtls	Prostate	cpgIslandShelf.1	-0.072	-0.161	0.016
eqtls	Prostate	CTCF.1	0.615	-0.035	1.265
eqtls	Prostate	enhD.1	0.051	-0.111	0.213
eqtls	Prostate	enhP.1	0.306	0.192	0.421
eqtls	Prostate	prom.1	1.206	1.113	1.299
eqtls	Prostate	splice.1	1.716	1.522	1.911
eqtls	Prostate	5_prime_UTR_variant.1	0.411	0.305	0.516
eqtls	Prostate	3_prime_UTR_variant.1	1.061	0.925	1.198
eqtls	Prostate	intron_variant.1	0.364	0.328	0.399
eqtls	Prostate	non_coding_transcript_exon_variant.1	0.812	0.741	0.882
eqtls	Prostate	coding_sequence_variant.1	0.246	0.102	0.391
eqtls	Testis	cpgIsland.1	0.469	0.412	0.526
eqtls	Testis	cpgIslandShore.1	0.041	-0.007	0.09
eqtls	Testis	cpgIslandShelf.1	-0.175	-0.236	-0.113
eqtls	Testis	CTCF.1	0.09	-0.378	0.557
eqtls	Testis	enhD.1	0.137	0.044	0.231
eqtls	Testis	enhP.1	0.1	0.025	0.175
eqtls	Testis	prom.1	0.691	0.622	0.76
eqtls	Testis	splice.1	1.622	1.48	1.763
eqtls	Testis	5_prime_UTR_variant.1	0.356	0.274	0.438
eqtls	Testis	3_prime_UTR_variant.1	0.809	0.712	0.906
eqtls	Testis	intron_variant.1	0.266	0.244	0.288
eqtls	Testis	non_coding_transcript_exon_variant.1	0.791	0.743	0.839
eqtls	Testis	coding_sequence_variant.1	0.367	0.268	0.467
eqtls	WholeBlood	cpgIsland.1	0.221	0.145	0.297
eqtls	WholeBlood	cpgIslandShore.1	-0.125	-0.19	-0.06
eqtls	WholeBlood	cpgIslandShelf.1	-0.125	-0.205	-0.046
eqtls	WholeBlood	CTCF.1	-0.603	-1.658	0.452
eqtls	WholeBlood	enhD.1	1.242	1.151	1.332
eqtls	WholeBlood	enhP.1	0.981	0.881	1.081
eqtls	WholeBlood	prom.1	1.372	1.267	1.478
eqtls	WholeBlood	splice.1	0.848	0.594	1.102
eqtls	WholeBlood	5_prime_UTR_variant.1	0.526	0.419	0.634
eqtls	WholeBlood	3_prime_UTR_variant.1	0.906	0.776	1.035
eqtls	WholeBlood	intron_variant.1	0.344	0.312	0.376
eqtls	WholeBlood	non_coding_transcript_exon_variant.1	0.46	0.383	0.538
eqtls	WholeBlood	coding_sequence_variant.1	0.376	0.229	0.523

## Sheet: Sheet8
QTL	ft	estimate	se	zval	pval	ci.lb	ci.ub	I2	QEp	padj	percent_top_QTL_variants
mQTLs	cpgIsland	-0.358258	0.0377298	-9.49535	2.19481e-21	-0.432207	-0.284309	56.0517	0.0248892	5.70649e-20	2.47295
mQTLs	cpgIslandShore	-0.0477344	0.0181583	-2.62879	0.00856892	-0.0833241	-0.0121448	0	0.532703	0.222792	9.19388
mQTLs	cpgIslandShelf	-0.0325395	0.023339	-1.39421	0.163253	-0.078283	0.013204	0	0.577756	1	8.63094
mQTLs	CTCF	1.01191	0.099215	10.1992	1.9991e-24	0.817456	1.20637	0	0.993833	5.19766e-23	0.56837
mQTLs	enhD	0.848844	0.0209466	40.5242	0	0.80779	0.889899	9.20542	0.387143	0	10.5653
mQTLs	enhP	0.364937	0.0548153	6.65758	2.78376e-11	0.257501	0.472374	70.0232	0.00233108	7.23777e-10	3.01705
mQTLs	prom	0.741984	0.0485503	15.2828	9.95848e-53	0.646828	0.837141	50.2496	0.0443824	2.58921e-51	1.14572
mQTLs	splice	0.23779	0.116329	2.04412	0.0409418	0.00978964	0.465791	0	0.8493	1	0.289449
mQTLs	5_prime_UTR_variant	-0.273036	0.0436256	-6.25862	3.88409e-10	-0.35854	-0.187531	13.2112	0.404442	1.00986e-08	0.838759
mQTLs	3_prime_UTR_variant	0.18268	0.0465063	3.92808	8.56254e-05	0.0915299	0.273831	0	0.776685	0.00222626	2.43328
mQTLs	intron_variant	-0.0368367	0.0252777	-1.45728	0.145039	-0.0863802	0.0127067	84.2067	4.11916e-06	1	62.1171
mQTLs	non_coding_transcript_exon_variant	-0.148281	0.0285098	-5.20104	1.98174e-07	-0.204159	-0.0924026	0	0.940328	5.15251e-06	4.89414
mQTLs	coding_sequence_variant	-0.114404	0.0549166	-2.08323	0.0372299	-0.222039	-0.00676955	9.06671	0.435445	0.967978	1.50963
eQTLs	cpgIsland	0.339293	0.0501483	6.7658	1.32572e-11	0.241005	0.437582	93.553	1.56977e-15	3.44688e-10	4.55604
eQTLs	cpgIslandShore	-0.0137382	0.023181	-0.592649	0.553416	-0.0591722	0.0316958	72.5466	0.000278544	1	11.5016
eQTLs	cpgIslandShelf	-0.166438	0.0208087	-7.99848	1.25961e-15	-0.207222	-0.125654	49.1877	0.0538308	3.27499e-14	10.2596
eQTLs	CTCF	-0.0634526	0.184023	-0.344809	0.730238	-0.424131	0.297225	40.8424	0.127865	1	0.389837
eQTLs	enhD	0.430186	0.124743	3.44859	0.000563521	0.185695	0.674678	97.2108	3.34522e-77	0.0146515	8.93047
eQTLs	enhP	0.470123	0.0920962	5.1047	3.31323e-07	0.289618	0.650629	96.1719	2.32955e-47	8.6144e-06	4.87892
eQTLs	prom	1.13739	0.0667631	17.0362	4.42461e-65	1.00654	1.26824	93.8722	1.28047e-37	1.1504e-63	2.97193
eQTLs	splice	1.27245	0.123058	10.3402	4.63318e-25	1.03126	1.51363	90.6424	2.20461e-15	1.20463e-23	0.776004
eQTLs	5_prime_UTR_variant	0.458229	0.025557	17.9297	6.91725e-72	0.408138	0.50832	48.5361	0.0535277	1.79849e-70	2.12622
eQTLs	3_prime_UTR_variant	1.04845	0.0543128	19.3039	4.98177e-83	0.941997	1.1549	82.3179	1.25813e-08	1.29526e-81	4.24968
eQTLs	intron_variant	0.385336	0.0254709	15.1285	1.05104e-51	0.335414	0.435258	95.0432	1.18971e-38	2.73272e-50	65.2788
eQTLs	non_coding_transcript_exon_variant	0.680989	0.0444942	15.3051	7.06911e-53	0.593781	0.768196	92.2284	2.38072e-19	1.83797e-51	8.74427
eQTLs	coding_sequence_variant	0.376549	0.0235836	15.9665	2.18569e-57	0.330325	0.422772	0	0.487798	5.68279e-56	2.60136

## Sheet: TF Binding Sites - Single Tissu
qtl	tissue	feature	logOR	logORcil	logORciu
mqtls	Breast	C11orf30	-0.402	-0.82	0.017
mqtls	Breast	ZNF280A	0.115	-1.615	1.844
mqtls	Breast	FOS	0.52	0.252	0.789
mqtls	Breast	TAF15	0.142	-0.227	0.51
mqtls	Breast	CUX1	0.131	-1.078	1.34
mqtls	Breast	NCOA3	1.006	-0.242	2.254
mqtls	Breast	KAT8	0.565	-1.28	2.409
mqtls	Breast	NFATC3	-0.719	-1.144	-0.294
mqtls	Breast	GABPA	-0.187	-0.492	0.118
mqtls	Breast	CCAR2	-0.266	-1.592	1.06
mqtls	Breast	UBTF	-0.022	-0.347	0.303
mqtls	Breast	CLOCK	-0.606	-1.134	-0.079
mqtls	Breast	TRIP13	0.667	-0.926	2.26
mqtls	Breast	ZNF579	-0.824	-1.503	-0.146
mqtls	Breast	TEAD4	0.714	0.307	1.121
mqtls	Breast	RBM15	-0.204	-2.292	1.884
mqtls	Breast	ZBTB7B	-0.035	-0.721	0.651
mqtls	Breast	MAFK	0.215	-0.162	0.591
mqtls	Breast	CHD7	0.553	-0.428	1.533
mqtls	Breast	ZNF274	-0.155	-1.219	0.91
mqtls	Breast	RBM34	-0.029	-2.65	2.592
mqtls	Breast	MGA	0.448	0.133	0.763
mqtls	Breast	GABPB1	-0.489	-0.859	-0.118
mqtls	Breast	PML	0.013	-0.31	0.337
mqtls	Breast	MYBL2	-1.275	-3.218	0.668
mqtls	Breast	NFIB	0.608	0.059	1.157
mqtls	Breast	NCOA4	-0.217	-1.527	1.093
mqtls	Breast	EP400	-0.121	-0.513	0.272
mqtls	Breast	ZNF316	0.223	-0.27	0.717
mqtls	Breast	MBD2	-0.299	-0.77	0.171
mqtls	Breast	E2F1	0.419	0.035	0.803
mqtls	Breast	SAP30	-0.556	-0.927	-0.185
mqtls	Breast	RNF2	0.081	-0.183	0.346
mqtls	Breast	TRIM28	-0.14	-0.556	0.276
mqtls	Breast	EP300	0.357	0.164	0.549
mqtls	Breast	KDM4A	-0.065	-0.412	0.283
mqtls	Breast	XRCC5	-0.486	-0.831	-0.141
mqtls	Breast	KDM5B	0.217	-0.13	0.564
mqtls	Breast	MEF2A	-0.35	-1.222	0.521
mqtls	Breast	ZBTB40	-0.513	-0.891	-0.135
mqtls	Breast	TAF1	-0.019	-0.218	0.181
mqtls	Breast	THAP1	-1.281	-2.726	0.164
mqtls	Breast	ZBTB8A	1.831	-1.308	4.969
mqtls	Breast	JUN	0.418	-0.035	0.872
mqtls	Breast	USF2	0.384	-0.046	0.815
mqtls	Breast	NR3C1	-0.284	-0.734	0.166
mqtls	Breast	NFIC	0.277	-0.014	0.568
mqtls	Breast	ATF4	-0.3	-1.036	0.436
mqtls	Breast	POLR2A	0.145	0.007	0.282
mqtls	Breast	NFE2	0.375	-0.288	1.038
mqtls	Breast	NFXL1	-0.336	-1.418	0.746
mqtls	Breast	SAFB2	-16.402	-839.781	806.978
mqtls	Breast	TAF9B	-0.084	-0.575	0.407
mqtls	Breast	ZNF24	-0.23	-0.561	0.1
mqtls	Breast	MYB	-3.395	-6.891	0.102
mqtls	Breast	NFRKB	-0.421	-0.864	0.021
mqtls	Breast	CC2D1A	-0.504	-1.124	0.117
mqtls	Breast	ZZZ3	-11.787	-19.745	-3.829
mqtls	Breast	TAF7	-0.166	-0.708	0.375
mqtls	Breast	ZEB2	-0.21	-0.659	0.24
mqtls	Breast	ZBTB33	-0.146	-0.444	0.152
mqtls	Breast	RAD21	0.764	0.569	0.96
mqtls	Breast	SOX6	-0.142	-0.614	0.331
mqtls	Breast	HDAC6	-1.69	-2.804	-0.576
mqtls	Breast	ETV6	-0.008	-0.469	0.452
mqtls	Breast	ZNF384	0.011	-0.411	0.434
mqtls	Breast	PCBP2	-3.627	-6.522	-0.732
mqtls	Breast	IRF2	-0.4	-1.341	0.541
mqtls	Breast	ZMYM3	-0.548	-1.298	0.203
mqtls	Breast	MNT	0.228	0.01	0.446
mqtls	Breast	REST	-0.23	-0.433	-0.026
mqtls	Breast	MCM2	-1.417	-4.464	1.631
mqtls	Breast	SRSF7	-12.075	-32.675	8.526
mqtls	Breast	ZNF687	-0.128	-0.486	0.231
mqtls	Breast	ZBTB11	-0.078	-0.72	0.563
mqtls	Breast	ZEB1	-0.443	-1.183	0.297
mqtls	Breast	NBN	-0.413	-0.731	-0.094
mqtls	Breast	ZNF639	0.312	-0.085	0.71
mqtls	Breast	PTBP1	-0.61	-1.3	0.079
mqtls	Breast	SREBF2	-0.09	-0.831	0.65
mqtls	Breast	MTA3	-0.706	-1.025	-0.387
mqtls	Breast	EED	-0.03	-0.443	0.384
mqtls	Breast	SMARCE1	-0.296	-0.753	0.161
mqtls	Breast	NFATC1	-0.158	-1.985	1.668
mqtls	Breast	CREBBP	-13.36	-87.529	60.808
mqtls	Breast	AFF1	-0.454	-0.936	0.028
mqtls	Breast	CEBPB	0.312	-0.087	0.712
mqtls	Breast	SIX5	-0.735	-1.39	-0.08
mqtls	Breast	NR2C1	-0.791	-1.426	-0.155
mqtls	Breast	CREB1	0.442	0.155	0.73
mqtls	Breast	LCORL	-0.184	-1.395	1.028
mqtls	Breast	ESRRA	-0.015	-0.327	0.298
mqtls	Breast	NR2F1	0.164	-0.3	0.627
mqtls	Breast	SPI1	0.458	0.072	0.843
mqtls	Breast	NR2F2	0.684	0.405	0.962
mqtls	Breast	ATF3	-0.263	-0.563	0.037
mqtls	Breast	EGR1	0.395	0.152	0.638
mqtls	Breast	ZNF507	0.834	-0.364	2.031
mqtls	Breast	PHF21A	-0.954	-1.827	-0.081
mqtls	Breast	MEF2C	-0.897	-2.235	0.441
mqtls	Breast	E4F1	0.291	-0.067	0.648
mqtls	Breast	U2AF1	-0.797	-1.351	-0.244
mqtls	Breast	ZHX2	0.07	-0.397	0.537
mqtls	Breast	ZNF282	-0.47	-1.09	0.151
mqtls	Breast	DPF2	-0.376	-0.627	-0.124
mqtls	Breast	NFYA	0.122	-0.939	1.182
mqtls	Breast	STAT3	0.093	-0.939	1.124
mqtls	Breast	GATAD2B	-0.36	-0.704	-0.017
mqtls	Breast	AGO1	-0.49	-0.888	-0.092
mqtls	Breast	EBF1	0.269	-0.356	0.893
mqtls	Breast	KDM1A	0.155	-0.102	0.412
mqtls	Breast	ZNF407	0.08	-0.652	0.812
mqtls	Breast	RB1	-0.512	-0.904	-0.12
mqtls	Breast	HDAC3	0.412	-0.245	1.069
mqtls	Breast	NANOG	0.626	-0.179	1.43
mqtls	Breast	IKZF2	0.15	-0.191	0.491
mqtls	Breast	NFYB	0.055	-0.495	0.605
mqtls	Breast	PRDM10	0.669	0.296	1.043
mqtls	Breast	NCOR1	0.216	-0.09	0.521
mqtls	Breast	MLLT1	-0.238	-0.549	0.073
mqtls	Breast	RBM39	0.064	-0.357	0.485
mqtls	Breast	ZHX1	-1.103	-2.274	0.067
mqtls	Breast	TRIM24	0.368	-0.131	0.866
mqtls	Breast	MCM5	-12.154	-68.812	44.505
mqtls	Breast	STAT1	-0.351	-1.071	0.37
mqtls	Breast	CBX2	0.341	-0.822	1.504
mqtls	Breast	HNF1A	-0.902	-1.983	0.179
mqtls	Breast	ARNT	0.265	-0.103	0.632
mqtls	Breast	SMAD2	-11.863	-88.695	64.969
mqtls	Breast	CBX1	-0.062	-0.524	0.4
mqtls	Breast	IRF4	0.403	-0.269	1.075
mqtls	Breast	RELB	0.066	-1.033	1.165
mqtls	Breast	BRCA1	-1.452	-3.241	0.338
mqtls	Breast	MTA1	-1.274	-1.97	-0.579
mqtls	Breast	MITF	-0.286	-0.914	0.343
mqtls	Breast	MCM7	0.154	-1.309	1.616
mqtls	Breast	THRA	0.332	-6.204	6.868
mqtls	Breast	STAT2	-6.109	-12.232	0.014
mqtls	Breast	ZNF8	0.001	-0.559	0.562
mqtls	Breast	MCM3	1.97	0.072	3.869
mqtls	Breast	MEIS2	0.112	-0.499	0.722
mqtls	Breast	GATA2	-0.118	-0.696	0.46
mqtls	Breast	ELK1	-0.281	-0.808	0.245
mqtls	Breast	HNRNPK	0.035	-0.309	0.379
mqtls	Breast	PHB2	0.243	-1.468	1.953
mqtls	Breast	KAT2A	-16.139	-77.654	45.376
mqtls	Breast	ZNF217	-0.915	-1.309	-0.521
mqtls	Breast	RBBP5	0.05	-0.246	0.346
mqtls	Breast	ZNF143	0.608	0.337	0.879
mqtls	Breast	E2F7	-3.102	-6.123	-0.081
mqtls	Breast	ZBTB7A	0.161	-0.156	0.479
mqtls	Breast	ZNF207	-0.524	-0.982	-0.067
mqtls	Breast	HNF4G	0.65	0.173	1.127
mqtls	Breast	SMARCA5	-0.182	-0.64	0.276
mqtls	Breast	NEUROD1	0.659	0.207	1.112
mqtls	Breast	JUNB	0.093	-0.473	0.659
mqtls	Breast	TAL1	-0.739	-1.337	-0.141
mqtls	Breast	SIN3B	-0.236	-0.741	0.268
mqtls	Breast	ASH2L	-0.351	-0.563	-0.14
mqtls	Breast	NCOA2	0.395	-2.464	3.254
mqtls	Breast	ZBTB1	-14.365	-51.244	22.515
mqtls	Breast	BRD4	-0.539	-1.043	-0.035
mqtls	Breast	ZBTB5	-0.522	-1.969	0.924
mqtls	Breast	SIN3A	0.175	-0.021	0.371
mqtls	Breast	PAX5	-0.149	-1.038	0.74
mqtls	Breast	CBFA2T2	0.467	-0.181	1.115
mqtls	Breast	ZKSCAN1	-0.236	-1.127	0.655
mqtls	Breast	PHF20	-0.123	-0.82	0.573
mqtls	Breast	ARID3A	-0.845	-1.337	-0.353
mqtls	Breast	SRSF4	-2.039	-4.226	0.147
mqtls	Breast	EHMT2	-0.386	-0.978	0.206
mqtls	Breast	ZBTB2	-0.507	-1.137	0.122
mqtls	Breast	SAFB	-1.061	-2.1	-0.022
mqtls	Breast	U2AF2	0.342	-0.714	1.398
mqtls	Breast	GATAD2A	-0.388	-1.393	0.617
mqtls	Breast	BMI1	0.019	-0.491	0.529
mqtls	Breast	RUNX3	0.61	0.252	0.967
mqtls	Breast	FOXP1	0.679	-2.255	3.612
mqtls	Breast	EWSR1	1.053	-2.245	4.35
mqtls	Breast	NUFIP1	-0.516	-1.885	0.854
mqtls	Breast	RBM14	-1.928	-3.459	-0.397
mqtls	Breast	HNRNPUL1	-6.004	-9.592	-2.416
mqtls	Breast	CBX3	-0.029	-0.474	0.416
mqtls	Breast	MAX	0.297	0.084	0.509
mqtls	Breast	CBFA2T3	0.571	0.112	1.03
mqtls	Breast	TCF12	-0.383	-0.666	-0.1
mqtls	Breast	CREM	-0.076	-0.448	0.295
mqtls	Breast	IRF5	-8.726	-20.022	2.57
mqtls	Breast	IRF3	0.201	-1.045	1.446
mqtls	Breast	E2F4	-0.224	-1.483	1.035
mqtls	Breast	RBM22	-0.481	-0.983	0.021
mqtls	Breast	CBX8	-9.447	-25.059	6.164
mqtls	Breast	ATM	0.7	-4.336	5.736
mqtls	Breast	ELF1	0.265	-0.014	0.543
mqtls	Breast	E2F8	-0.615	-1.195	-0.036
mqtls	Breast	HSF1	-3.95	-7.907	0.007
mqtls	Breast	FOSL2	0.373	-0.06	0.805
mqtls	Breast	CBFB	-0.317	-0.879	0.246
mqtls	Breast	RBFOX2	-0.054	-0.313	0.205
mqtls	Breast	WHSC1	0.349	-2.824	3.523
mqtls	Breast	MTA2	-0.388	-0.779	0.003
mqtls	Breast	CHD4	0.466	0.023	0.91
mqtls	Breast	KLF5	-0.883	-1.57	-0.196
mqtls	Breast	KLF16	0.389	-0.267	1.046
mqtls	Breast	ZNF512B	-0.387	-1.83	1.055
mqtls	Breast	SETDB1	-0.332	-1.555	0.891
mqtls	Breast	SKIL	-1.066	-1.483	-0.649
mqtls	Breast	SREBF1	-0.403	-1.199	0.393
mqtls	Breast	NCOA1	-0.012	-0.348	0.324
mqtls	Breast	GMEB1	-0.305	-0.723	0.113
mqtls	Breast	CDC5L	0.194	-0.905	1.294
mqtls	Breast	NR2F6	0.211	-0.179	0.6
mqtls	Breast	EZH2	-0.31	-0.568	-0.053
mqtls	Breast	FOXK2	0.205	-0.207	0.618
mqtls	Breast	HDAC2	0.062	-0.235	0.36
mqtls	Breast	MYC	0.148	-0.084	0.38
mqtls	Breast	ZNF263	0.022	-0.285	0.329
mqtls	Breast	BHLHE40	0.284	0.012	0.556
mqtls	Breast	RXRA	0.313	0.057	0.568
mqtls	Breast	MYNN	-0.241	-0.875	0.393
mqtls	Breast	TBX21	-0.486	-1.016	0.043
mqtls	Breast	KAT2B	-0.113	-1.971	1.745
mqtls	Breast	ZNF574	-1.617	-3.203	-0.031
mqtls	Breast	SIX4	-0.178	-1.862	1.506
mqtls	Breast	TBX3	-0.111	-0.727	0.505
mqtls	Breast	DNMT1	-0.059	-1.15	1.033
mqtls	Breast	HDAC1	-0.013	-0.217	0.191
mqtls	Breast	ZFX	-0.29	-0.551	-0.03
mqtls	Breast	ARHGAP35	-0.947	-2.257	0.362
mqtls	Breast	FOXA2	0.079	-4.8	4.957
mqtls	Breast	TBL1XR1	-0.589	-1.046	-0.131
mqtls	Breast	POLR2G	0.196	-0.005	0.398
mqtls	Breast	ZNF444	-0.118	-1.075	0.838
mqtls	Breast	IKZF1	0.213	0.007	0.419
mqtls	Breast	L3MBTL2	0.347	0.119	0.575
mqtls	Breast	ASH1L	0.473	-0.201	1.148
mqtls	Breast	PBX3	-0.032	-0.695	0.631
mqtls	Breast	KDM5A	-0.938	-1.344	-0.531
mqtls	Breast	RAD51	0.14	-0.419	0.699
mqtls	Breast	PHF8	0.208	-0.023	0.439
mqtls	Breast	HNRNPH1	-7.725	-15.561	0.111
mqtls	Breast	WRNIP1	-5.13	-8.396	-1.864
mqtls	Breast	PAX8	-3.046	-6.161	0.069
mqtls	Breast	MXI1	-0.001	-0.232	0.229
mqtls	Breast	TCF7L2	-0.609	-1.09	-0.128
mqtls	Breast	RUNX1	-1.11	-2.061	-0.158
mqtls	Breast	SIRT6	-15.444	-52.137	21.249
mqtls	Breast	AGO2	-0.225	-0.567	0.117
mqtls	Breast	NCOA6	-0.028	-1.156	1.099
mqtls	Breast	RBM25	-1.026	-1.92	-0.133
mqtls	Breast	RCOR1	0.327	-0.017	0.67
mqtls	Breast	BCOR	-0.89	-1.417	-0.363
mqtls	Breast	SMAD5	-0.206	-0.562	0.149
mqtls	Breast	DACH1	0.168	-0.702	1.039
mqtls	Breast	RFX1	0.188	-0.209	0.585
mqtls	Breast	HMBOX1	0.326	-0.167	0.82
mqtls	Breast	LEF1	0.496	0.101	0.891
mqtls	Breast	SOX13	0.215	-0.963	1.393
mqtls	Breast	NR2C2	-0.829	-3.027	1.368
mqtls	Breast	STAT5A	-0.209	-0.88	0.461
mqtls	Breast	SMARCA4	0.187	-0.082	0.455
mqtls	Breast	HES1	-0.576	-1.457	0.305
mqtls	Breast	USF1	0.327	-0.092	0.746
mqtls	Breast	ZNF318	-1.441	-2.528	-0.353
mqtls	Breast	KDM4B	-0.749	-1.402	-0.096
mqtls	Breast	SMC3	0.249	-0.007	0.504
mqtls	Breast	GATA3	0.135	-0.261	0.53
mqtls	Breast	ELF4	0.259	-0.129	0.646
mqtls	Breast	JUND	0.208	-0.013	0.428
mqtls	Breast	PRPF4	-3.944	-5.106	-2.782
mqtls	Breast	DEAF1	-0.975	-1.922	-0.027
mqtls	Breast	TFAP4	0.335	-0.067	0.736
mqtls	Breast	ZNF184	0.2	-0.582	0.982
mqtls	Breast	ETV4	0.039	-0.337	0.415
mqtls	Breast	GATA4	0.186	-0.321	0.692
mqtls	Breast	TBP	0	-0.219	0.219
mqtls	Breast	NRF1	-0.022	-0.228	0.184
mqtls	Breast	ZNF830	-0.241	-3.6	3.119
mqtls	Breast	FUS	-0.624	-1.18	-0.067
mqtls	Breast	CTCF	0.411	0.28	0.542
mqtls	Breast	NFE2L2	-0.089	-0.726	0.548
mqtls	Breast	MIER1	0.445	-0.12	1.01
mqtls	Breast	HCFC1	-0.535	-0.931	-0.138
mqtls	Breast	RFX5	-0.236	-0.651	0.178
mqtls	Breast	BRD9	-0.994	-1.584	-0.404
mqtls	Breast	ZSCAN29	-1.376	-1.977	-0.775
mqtls	Breast	SMARCB1	-0.715	-2.557	1.126
mqtls	Breast	BATF	0.824	0.118	1.531
mqtls	Breast	XRCC3	-1.431	-9.174	6.313
mqtls	Breast	TCF7	-0.602	-1.322	0.119
mqtls	Breast	ZFP91	-0.052	-0.665	0.561
mqtls	Breast	SMARCC2	0.797	0.202	1.392
mqtls	Breast	COPS2	-0.396	-2.707	1.916
mqtls	Breast	SKI	-0.125	-0.534	0.283
mqtls	Breast	YY1	0.155	-0.032	0.342
mqtls	Breast	ATF2	-0.35	-0.701	0.002
mqtls	Breast	FOXA1	0.113	-0.243	0.469
mqtls	Breast	FIP1L1	-0.482	-0.878	-0.086
mqtls	Breast	SP1	0.428	0.239	0.618
mqtls	Breast	BACH1	0.181	-0.285	0.646
mqtls	Breast	PYGO2	-0.636	-2.619	1.347
mqtls	Breast	CHD1	-0.916	-1.401	-0.431
mqtls	Breast	NR0B1	-6.303	-52.873	40.267
mqtls	Breast	ETS1	0.013	-0.288	0.313
mqtls	Breast	E2F6	0.281	-0.101	0.663
mqtls	Breast	TRIM22	0.353	0.036	0.67
mqtls	Breast	PKNOX1	0.085	-0.316	0.486
mqtls	Breast	CTBP1	0.352	0.084	0.621
mqtls	Breast	BCL11A	-0.472	-1.731	0.786
mqtls	Breast	CREB3L1	-0.574	-1.007	-0.141
mqtls	Breast	RLF	-0.456	-1.225	0.313
mqtls	Breast	POU2F2	-0.482	-1.138	0.174
mqtls	Breast	HNRNPLL	-0.284	-0.581	0.013
mqtls	Breast	MEF2B	-0.067	-0.441	0.307
mqtls	Breast	PCBP1	0.053	-0.301	0.406
mqtls	Breast	FOXM1	-1.215	-2.094	-0.336
mqtls	Breast	ARID1B	0.141	-0.408	0.69
mqtls	Breast	ZMIZ1	1.057	-0.576	2.689
mqtls	Breast	ATF7	-0.072	-0.495	0.351
mqtls	Colon	C11orf30	-0.132	-0.318	0.054
mqtls	Colon	ZNF280A	-4.428	-7.153	-1.702
mqtls	Colon	FOS	0.538	0.407	0.669
mqtls	Colon	TAF15	-0.18	-0.353	-0.006
mqtls	Colon	CUX1	0.08	-0.263	0.423
mqtls	Colon	NCOA3	0.598	-0.038	1.234
mqtls	Colon	KAT8	0.271	-0.444	0.985
mqtls	Colon	NFATC3	0.012	-0.15	0.174
mqtls	Colon	GABPA	-0.108	-0.246	0.03
mqtls	Colon	CCAR2	-0.369	-0.874	0.137
mqtls	Colon	UBTF	-0.102	-0.29	0.087
mqtls	Colon	CLOCK	-0.462	-0.693	-0.231
mqtls	Colon	TRIP13	1.173	0.593	1.754
mqtls	Colon	ZNF579	-0.099	-0.376	0.179
mqtls	Colon	TEAD4	0.259	0.038	0.479
mqtls	Colon	RBM15	0.198	-2.572	2.969
mqtls	Colon	ZBTB7B	0.203	-0.149	0.555
mqtls	Colon	MAFK	0.108	-0.069	0.286
mqtls	Colon	CHD7	-0.416	-1.023	0.191
mqtls	Colon	ZNF274	-0.079	-1.35	1.193
mqtls	Colon	RBM34	0.811	-0.072	1.693
mqtls	Colon	MGA	0.195	0.032	0.357
mqtls	Colon	GABPB1	-0.278	-0.438	-0.118
mqtls	Colon	PML	-0.44	-0.64	-0.241
mqtls	Colon	MYBL2	0.31	-0.129	0.749
mqtls	Colon	NFIB	-0.156	-0.47	0.159
mqtls	Colon	NCOA4	-0.498	-1.222	0.225
mqtls	Colon	EP400	-0.124	-0.277	0.029
mqtls	Colon	ZNF316	0.357	0.167	0.546
mqtls	Colon	MBD2	0.381	0.193	0.569
mqtls	Colon	E2F1	-0.011	-0.173	0.15
mqtls	Colon	SAP30	-0.593	-0.777	-0.409
mqtls	Colon	RNF2	-0.002	-0.102	0.098
mqtls	Colon	TRIM28	0.035	-0.138	0.208
mqtls	Colon	EP300	0.427	0.334	0.521
mqtls	Colon	KDM4A	-0.148	-0.268	-0.028
mqtls	Colon	XRCC5	-0.15	-0.305	0.005
mqtls	Colon	KDM5B	0.124	-0.038	0.286
mqtls	Colon	MEF2A	0.213	-0.074	0.5
mqtls	Colon	ZBTB40	-0.163	-0.328	0.002
mqtls	Colon	TAF1	0.006	-0.081	0.094
mqtls	Colon	THAP1	-0.265	-0.675	0.145
mqtls	Colon	ZBTB8A	0.463	-1.452	2.378
mqtls	Colon	JUN	0.401	0.197	0.605
mqtls	Colon	USF2	0.426	0.226	0.626
mqtls	Colon	NR3C1	-0.113	-0.309	0.083
mqtls	Colon	NFIC	0.02	-0.193	0.233
mqtls	Colon	ATF4	-0.201	-0.497	0.094
mqtls	Colon	POLR2A	0.112	0.044	0.18
mqtls	Colon	NFE2	0.406	0.133	0.679
mqtls	Colon	NFXL1	-0.068	-0.755	0.62
mqtls	Colon	SAFB2	-16.07	-1519.01	1486.87
mqtls	Colon	TAF9B	-0.4	-0.636	-0.164
mqtls	Colon	ZNF24	-0.054	-0.21	0.101
mqtls	Colon	MYB	0.008	-0.471	0.487
mqtls	Colon	NFRKB	-0.304	-0.492	-0.117
mqtls	Colon	CC2D1A	0.242	0.025	0.458
mqtls	Colon	ZZZ3	-0.362	-0.893	0.169
mqtls	Colon	TAF7	-0.387	-0.613	-0.162
mqtls	Colon	ZEB2	-0.004	-0.146	0.137
mqtls	Colon	ZBTB33	-0.158	-0.291	-0.025
mqtls	Colon	RAD21	0.562	0.465	0.659
mqtls	Colon	SOX6	-0.221	-0.414	-0.028
mqtls	Colon	HDAC6	-0.776	-1.123	-0.43
mqtls	Colon	ETV6	-0.105	-0.341	0.13
mqtls	Colon	ZNF384	0.173	-0.044	0.39
mqtls	Colon	PCBP2	-1.315	-2	-0.631
mqtls	Colon	IRF2	0.111	-0.236	0.457
mqtls	Colon	ZMYM3	-0.069	-0.42	0.281
mqtls	Colon	MNT	0.018	-0.112	0.148
mqtls	Colon	REST	-0.054	-0.157	0.049
mqtls	Colon	MCM2	-3.196	-5.007	-1.384
mqtls	Colon	SRSF7	-9.095	-16.624	-1.566
mqtls	Colon	ZNF687	0.198	0.056	0.339
mqtls	Colon	ZBTB11	-0.212	-0.493	0.069
mqtls	Colon	ZEB1	-0.763	-1.139	-0.387
mqtls	Colon	NBN	0.115	-0.02	0.251
mqtls	Colon	ZNF639	-0.095	-0.286	0.096
mqtls	Colon	PTBP1	-0.504	-0.835	-0.173
mqtls	Colon	SREBF2	-0.675	-1.056	-0.295
mqtls	Colon	MTA3	-0.218	-0.356	-0.081
mqtls	Colon	EED	-0.024	-0.388	0.339
mqtls	Colon	SMARCE1	0.239	0.069	0.41
mqtls	Colon	NFATC1	0.082	-0.238	0.402
mqtls	Colon	CREBBP	-13.662	-40.15	12.825
mqtls	Colon	AFF1	-0.191	-0.385	0.003
mqtls	Colon	CEBPB	0.366	0.177	0.554
mqtls	Colon	SIX5	-0.684	-0.952	-0.416
mqtls	Colon	NR2C1	0.02	-0.201	0.241
mqtls	Colon	CREB1	0.291	0.147	0.436
mqtls	Colon	LCORL	-0.126	-0.712	0.461
mqtls	Colon	ESRRA	-0.003	-0.144	0.139
mqtls	Colon	NR2F1	-0.017	-0.186	0.153
mqtls	Colon	SPI1	0.462	0.271	0.652
mqtls	Colon	NR2F2	0.42	0.278	0.561
mqtls	Colon	ATF3	-0.129	-0.273	0.015
mqtls	Colon	EGR1	0.093	-0.029	0.215
mqtls	Colon	ZNF507	0.042	-0.54	0.623
mqtls	Colon	PHF21A	-0.529	-0.889	-0.169
mqtls	Colon	MEF2C	-0.675	-1.158	-0.191
mqtls	Colon	E4F1	0.072	-0.097	0.241
mqtls	Colon	U2AF1	-0.368	-0.611	-0.125
mqtls	Colon	ZHX2	0.033	-0.268	0.333
mqtls	Colon	ZNF282	-0.708	-0.996	-0.421
mqtls	Colon	DPF2	0.081	-0.035	0.198
mqtls	Colon	NFYA	0.22	-0.282	0.721
mqtls	Colon	STAT3	0.397	0.211	0.584
mqtls	Colon	GATAD2B	-0.037	-0.193	0.12
mqtls	Colon	AGO1	-0.562	-0.753	-0.37
mqtls	Colon	EBF1	0.279	0.013	0.544
mqtls	Colon	KDM1A	0.188	0.068	0.308
mqtls	Colon	ZNF407	-0.153	-0.568	0.263
mqtls	Colon	RB1	-0.085	-0.259	0.088
mqtls	Colon	HDAC3	-0.146	-0.527	0.236
mqtls	Colon	NANOG	0.373	-0.045	0.79
mqtls	Colon	IKZF2	0.075	-0.073	0.224
mqtls	Colon	NFYB	-0.064	-0.378	0.249
mqtls	Colon	PRDM10	0.261	0.06	0.462
mqtls	Colon	NCOR1	-0.021	-0.232	0.19
mqtls	Colon	MLLT1	-0.116	-0.254	0.023
mqtls	Colon	RBM39	-0.095	-0.227	0.037
mqtls	Colon	ZHX1	-0.26	-0.611	0.09
mqtls	Colon	TRIM24	-0.085	-0.317	0.146
mqtls	Colon	MCM5	-7.422	-21.068	6.223
mqtls	Colon	STAT1	-0.348	-0.629	-0.067
mqtls	Colon	CBX2	-0.565	-1.12	-0.01
mqtls	Colon	HNF1A	-0.064	-0.53	0.403
mqtls	Colon	ARNT	0.162	-0.002	0.327
mqtls	Colon	SMAD2	0.74	-1.414	2.895
mqtls	Colon	CBX1	0.093	-0.122	0.308
mqtls	Colon	IRF4	0.666	0.368	0.964
mqtls	Colon	RELB	-0.084	-0.251	0.083
mqtls	Colon	BRCA1	-0.036	-0.518	0.446
mqtls	Colon	MTA1	0.07	-0.161	0.302
mqtls	Colon	MITF	0.056	-0.228	0.339
mqtls	Colon	MCM7	0.087	-1.474	1.648
mqtls	Colon	THRA	-0.073	-1.239	1.094
mqtls	Colon	STAT2	-1.063	-1.87	-0.256
mqtls	Colon	ZNF8	-11.543	-123.242	100.156
mqtls	Colon	MCM3	1.111	-0.117	2.339
mqtls	Colon	MEIS2	0.288	0.096	0.479
mqtls	Colon	GATA2	0.043	-0.187	0.273
mqtls	Colon	ELK1	-0.209	-0.444	0.026
mqtls	Colon	HNRNPK	-0.592	-0.796	-0.388
mqtls	Colon	PHB2	0.39	-0.075	0.855
mqtls	Colon	KAT2A	-9.182	-19.719	1.355
mqtls	Colon	ZNF217	-0.109	-0.273	0.055
mqtls	Colon	RBBP5	-0.383	-0.535	-0.231
mqtls	Colon	ZNF143	0.566	0.432	0.699
mqtls	Colon	E2F7	-0.827	-1.475	-0.18
mqtls	Colon	ZBTB7A	0.109	-0.046	0.263
mqtls	Colon	ZNF207	-0.065	-0.276	0.147
mqtls	Colon	HNF4G	0.396	0.161	0.63
mqtls	Colon	SMARCA5	0.013	-0.151	0.177
mqtls	Colon	NEUROD1	0.499	0.271	0.727
mqtls	Colon	JUNB	-0.011	-0.27	0.249
mqtls	Colon	TAL1	-0.423	-0.678	-0.169
mqtls	Colon	SIN3B	-0.575	-0.796	-0.354
mqtls	Colon	ASH2L	0.003	-0.081	0.087
mqtls	Colon	NCOA2	-0.064	-0.74	0.613
mqtls	Colon	ZBTB1	-15.301	-34.035	3.432
mqtls	Colon	BRD4	-0.433	-0.647	-0.218
mqtls	Colon	ZBTB5	-1.226	-1.898	-0.555
mqtls	Colon	SIN3A	0.028	-0.072	0.128
mqtls	Colon	PAX5	0.277	0.039	0.515
mqtls	Colon	CBFA2T2	0.437	0.153	0.722
mqtls	Colon	ZKSCAN1	-0.056	-0.398	0.285
mqtls	Colon	PHF20	-0.371	-0.585	-0.156
mqtls	Colon	ARID3A	-0.137	-0.33	0.056
mqtls	Colon	SRSF4	-0.664	-1.317	-0.011
mqtls	Colon	EHMT2	0.257	0.016	0.498
mqtls	Colon	ZBTB2	-0.034	-0.422	0.354
mqtls	Colon	SAFB	-0.075	-0.418	0.268
mqtls	Colon	U2AF2	-0.025	-0.435	0.386
mqtls	Colon	GATAD2A	-0.3	-0.633	0.033
mqtls	Colon	BMI1	0.131	-0.148	0.41
mqtls	Colon	RUNX3	0.444	0.279	0.61
mqtls	Colon	FOXP1	0.166	-1.108	1.441
mqtls	Colon	EWSR1	0.05	-1.683	1.783
mqtls	Colon	NUFIP1	-0.127	-0.701	0.447
mqtls	Colon	RBM14	-0.567	-1.058	-0.075
mqtls	Colon	HNRNPUL1	-0.911	-1.423	-0.4
mqtls	Colon	CBX3	-0.333	-0.55	-0.115
mqtls	Colon	MAX	0.161	0.056	0.266
mqtls	Colon	CBFA2T3	0.52	0.305	0.735
mqtls	Colon	TCF12	0.042	-0.089	0.172
mqtls	Colon	CREM	0.175	0.041	0.308
mqtls	Colon	IRF5	0.043	-0.857	0.942
mqtls	Colon	IRF3	0.262	-0.07	0.593
mqtls	Colon	E2F4	-0.129	-0.544	0.285
mqtls	Colon	RBM22	-0.199	-0.418	0.019
mqtls	Colon	CBX8	-0.672	-2.123	0.779
mqtls	Colon	ATM	0.381	-2.215	2.977
mqtls	Colon	ELF1	0.314	0.183	0.444
mqtls	Colon	E2F8	-0.056	-0.314	0.202
mqtls	Colon	HSF1	-0.653	-1.363	0.056
mqtls	Colon	FOSL2	0.307	0.116	0.498
mqtls	Colon	CBFB	-0.585	-0.819	-0.351
mqtls	Colon	RBFOX2	-0.394	-0.491	-0.297
mqtls	Colon	WHSC1	0.27	-0.767	1.307
mqtls	Colon	MTA2	0.29	0.136	0.444
mqtls	Colon	CHD4	-0.064	-0.316	0.188
mqtls	Colon	KLF5	-0.344	-0.592	-0.095
mqtls	Colon	KLF16	0.277	-0.008	0.563
mqtls	Colon	ZNF512B	-0.257	-0.803	0.288
mqtls	Colon	SETDB1	-0.216	-0.601	0.17
mqtls	Colon	SKIL	-0.197	-0.355	-0.04
mqtls	Colon	SREBF1	0.211	-0.069	0.49
mqtls	Colon	NCOA1	-0.265	-0.447	-0.082
mqtls	Colon	GMEB1	-0.279	-0.444	-0.113
mqtls	Colon	CDC5L	-0.593	-1.199	0.012
mqtls	Colon	NR2F6	0.19	0.007	0.373
mqtls	Colon	EZH2	-0.14	-0.261	-0.019
mqtls	Colon	FOXK2	-0.152	-0.337	0.033
mqtls	Colon	HDAC2	0.1	-0.006	0.206
mqtls	Colon	MYC	0.001	-0.079	0.081
mqtls	Colon	ZNF263	-0.17	-0.335	-0.005
mqtls	Colon	BHLHE40	0.177	0.051	0.303
mqtls	Colon	RXRA	0.396	0.269	0.524
mqtls	Colon	MYNN	-0.029	-0.601	0.542
mqtls	Colon	TBX21	0.076	-0.135	0.286
mqtls	Colon	KAT2B	0.747	-0.428	1.921
mqtls	Colon	ZNF574	-0.164	-0.611	0.282
mqtls	Colon	SIX4	-0.049	-0.864	0.767
mqtls	Colon	TBX3	-0.058	-0.375	0.26
mqtls	Colon	DNMT1	-0.146	-0.611	0.32
mqtls	Colon	HDAC1	0.078	-0.031	0.187
mqtls	Colon	ZFX	-0.048	-0.18	0.084
mqtls	Colon	ARHGAP35	-1.019	-1.695	-0.342
mqtls	Colon	FOXA2	0.34	0.158	0.522
mqtls	Colon	TBL1XR1	-0.16	-0.343	0.023
mqtls	Colon	POLR2G	-0.197	-0.298	-0.097
mqtls	Colon	ZNF444	0.225	0.019	0.431
mqtls	Colon	IKZF1	0.341	0.243	0.439
mqtls	Colon	L3MBTL2	0.067	-0.048	0.181
mqtls	Colon	ASH1L	0.243	-0.065	0.55
mqtls	Colon	PBX3	0.107	-0.295	0.509
mqtls	Colon	KDM5A	-0.997	-1.184	-0.81
mqtls	Colon	RAD51	0.088	-0.128	0.303
mqtls	Colon	PHF8	-0.029	-0.156	0.098
mqtls	Colon	HNRNPH1	-0.7	-1.406	0.005
mqtls	Colon	WRNIP1	-0.937	-1.467	-0.407
mqtls	Colon	PAX8	-0.625	-1.278	0.028
mqtls	Colon	MXI1	-0.041	-0.16	0.078
mqtls	Colon	TCF7L2	0.012	-0.169	0.193
mqtls	Colon	RUNX1	-0.188	-0.602	0.226
mqtls	Colon	SIRT6	0.512	-1.051	2.075
mqtls	Colon	AGO2	-0.396	-0.566	-0.226
mqtls	Colon	NCOA6	-0.438	-1.068	0.192
mqtls	Colon	RBM25	-0.123	-0.428	0.182
mqtls	Colon	RCOR1	0.366	0.201	0.532
mqtls	Colon	BCOR	-0.298	-0.513	-0.083
mqtls	Colon	SMAD5	-0.109	-0.279	0.06
mqtls	Colon	DACH1	0.17	-0.137	0.477
mqtls	Colon	RFX1	0.247	0.056	0.438
mqtls	Colon	HMBOX1	0.447	0.214	0.681
mqtls	Colon	LEF1	-0.015	-0.2	0.17
mqtls	Colon	SOX13	-0.117	-0.571	0.337
mqtls	Colon	NR2C2	1.024	0.404	1.644
mqtls	Colon	STAT5A	-0.635	-0.916	-0.355
mqtls	Colon	SMARCA4	0.231	0.101	0.36
mqtls	Colon	HES1	0.121	-0.194	0.437
mqtls	Colon	USF1	0.65	0.462	0.839
mqtls	Colon	ZNF318	-0.339	-0.729	0.051
mqtls	Colon	KDM4B	-0.562	-0.836	-0.287
mqtls	Colon	SMC3	0.315	0.189	0.442
mqtls	Colon	GATA3	0.344	0.18	0.508
mqtls	Colon	ELF4	0.324	0.142	0.506
mqtls	Colon	JUND	0.173	0.064	0.281
mqtls	Colon	PRPF4	-0.971	-1.233	-0.709
mqtls	Colon	DEAF1	-0.124	-0.526	0.278
mqtls	Colon	TFAP4	-0.075	-0.295	0.145
mqtls	Colon	ZNF184	0.073	-0.209	0.355
mqtls	Colon	ETV4	0.043	-0.191	0.276
mqtls	Colon	GATA4	-0.154	-0.387	0.079
mqtls	Colon	TBP	0.116	0	0.232
mqtls	Colon	NRF1	-0.314	-0.424	-0.203
mqtls	Colon	ZNF830	-0.266	-0.77	0.238
mqtls	Colon	FUS	-0.492	-0.767	-0.217
mqtls	Colon	CTCF	0.238	0.169	0.306
mqtls	Colon	NFE2L2	0.002	-0.207	0.212
mqtls	Colon	MIER1	-0.147	-0.465	0.171
mqtls	Colon	HCFC1	-0.489	-0.669	-0.309
mqtls	Colon	RFX5	-0.087	-0.275	0.102
mqtls	Colon	BRD9	-0.438	-0.676	-0.201
mqtls	Colon	ZSCAN29	-0.225	-0.442	-0.008
mqtls	Colon	SMARCB1	-0.64	-1.405	0.125
mqtls	Colon	BATF	0.085	-0.351	0.521
mqtls	Colon	XRCC3	-0.823	-2.33	0.684
mqtls	Colon	TCF7	0.289	0.045	0.532
mqtls	Colon	ZFP91	0	-0.175	0.175
mqtls	Colon	SMARCC2	0.291	0.005	0.576
mqtls	Colon	COPS2	-5.752	-11.175	-0.329
mqtls	Colon	SKI	-0.134	-0.302	0.034
mqtls	Colon	YY1	0.124	0.03	0.218
mqtls	Colon	ATF2	0.076	-0.092	0.245
mqtls	Colon	FOXA1	0.353	0.211	0.495
mqtls	Colon	FIP1L1	-0.457	-0.65	-0.264
mqtls	Colon	SP1	0.243	0.147	0.339
mqtls	Colon	BACH1	-0.234	-0.427	-0.042
mqtls	Colon	PYGO2	0.089	-0.556	0.735
mqtls	Colon	CHD1	-0.744	-0.94	-0.548
mqtls	Colon	NR0B1	-7.83	-31.674	16.014
mqtls	Colon	ETS1	-0.274	-0.44	-0.108
mqtls	Colon	E2F6	0.071	-0.116	0.258
mqtls	Colon	TRIM22	0.186	0.035	0.336
mqtls	Colon	PKNOX1	0.252	0.122	0.381
mqtls	Colon	CTBP1	0.071	-0.055	0.198
mqtls	Colon	BCL11A	0.246	-0.117	0.608
mqtls	Colon	CREB3L1	-0.16	-0.333	0.012
mqtls	Colon	RLF	-0.4	-0.693	-0.106
mqtls	Colon	POU2F2	0.028	-0.522	0.578
mqtls	Colon	HNRNPLL	0.067	-0.065	0.199
mqtls	Colon	MEF2B	-0.086	-0.269	0.098
mqtls	Colon	PCBP1	-0.204	-0.38	-0.028
mqtls	Colon	FOXM1	0.105	-0.144	0.354
mqtls	Colon	ARID1B	0.122	-0.08	0.324
mqtls	Colon	ZMIZ1	0.556	-0.214	1.326
mqtls	Colon	ATF7	0.244	0.123	0.365
mqtls	Kidney	C11orf30	-0.317	-0.632	-0.001
mqtls	Kidney	ZNF280A	-11.027	-18.827	-3.227
mqtls	Kidney	FOS	0.488	0.268	0.708
mqtls	Kidney	TAF15	-0.319	-0.634	-0.005
mqtls	Kidney	CUX1	0.475	0.022	0.927
mqtls	Kidney	NCOA3	0.269	-1.736	2.275
mqtls	Kidney	KAT8	0.495	-0.641	1.631
mqtls	Kidney	NFATC3	-0.163	-0.475	0.149
mqtls	Kidney	GABPA	-0.431	-0.671	-0.191
mqtls	Kidney	CCAR2	-0.417	-1.403	0.57
mqtls	Kidney	UBTF	0.176	-0.123	0.474
mqtls	Kidney	CLOCK	-0.521	-0.982	-0.061
mqtls	Kidney	TRIP13	1.892	1.125	2.659
mqtls	Kidney	ZNF579	-0.816	-1.351	-0.282
mqtls	Kidney	TEAD4	0.718	0.376	1.061
mqtls	Kidney	RBM15	0.229	-2.111	2.569
mqtls	Kidney	ZBTB7B	-0.119	-1.121	0.884
mqtls	Kidney	MAFK	0.423	0.142	0.703
mqtls	Kidney	CHD7	-1.281	-2.368	-0.194
mqtls	Kidney	ZNF274	-0.814	-1.873	0.244
mqtls	Kidney	RBM34	0.973	-0.74	2.685
mqtls	Kidney	MGA	0.318	0.039	0.597
mqtls	Kidney	GABPB1	-0.116	-0.415	0.184
mqtls	Kidney	PML	-0.692	-1.059	-0.325
mqtls	Kidney	MYBL2	0.669	0.034	1.305
mqtls	Kidney	NFIB	0.062	-0.434	0.558
mqtls	Kidney	NCOA4	-1.078	-2.391	0.236
mqtls	Kidney	EP400	-0.066	-0.373	0.242
mqtls	Kidney	ZNF316	0.397	0.077	0.717
mqtls	Kidney	MBD2	0.067	-0.383	0.517
mqtls	Kidney	E2F1	0.21	-0.089	0.508
mqtls	Kidney	SAP30	-0.655	-0.977	-0.334
mqtls	Kidney	RNF2	-0.111	-0.312	0.09
mqtls	Kidney	TRIM28	0.258	-0.01	0.527
mqtls	Kidney	EP300	0.362	0.197	0.527
mqtls	Kidney	KDM4A	-0.25	-0.464	-0.037
mqtls	Kidney	XRCC5	-0.503	-0.793	-0.214
mqtls	Kidney	KDM5B	0.313	0.029	0.598
mqtls	Kidney	MEF2A	-0.155	-0.797	0.487
mqtls	Kidney	ZBTB40	-0.18	-0.468	0.108
mqtls	Kidney	TAF1	-0.084	-0.278	0.11
mqtls	Kidney	THAP1	-0.35	-1.136	0.435
mqtls	Kidney	ZBTB8A	-3.934	-21.34	13.472
mqtls	Kidney	JUN	0.86	0.527	1.193
mqtls	Kidney	USF2	0.581	0.234	0.928
mqtls	Kidney	NR3C1	-0.271	-0.622	0.081
mqtls	Kidney	NFIC	0.196	-0.053	0.444
mqtls	Kidney	ATF4	-0.611	-1.176	-0.047
mqtls	Kidney	POLR2A	0.074	-0.047	0.196
mqtls	Kidney	NFE2	0.527	0.069	0.985
mqtls	Kidney	NFXL1	-0.224	-1.178	0.73
mqtls	Kidney	SAFB2	-19.314	-861.956	823.329
mqtls	Kidney	TAF9B	-0.2	-0.716	0.316
mqtls	Kidney	ZNF24	-0.239	-0.513	0.035
mqtls	Kidney	MYB	-6.792	-11.767	-1.816
mqtls	Kidney	NFRKB	-0.788	-1.179	-0.397
mqtls	Kidney	CC2D1A	0.226	-0.159	0.611
mqtls	Kidney	ZZZ3	-0.054	-1.082	0.975
mqtls	Kidney	TAF7	-0.672	-1.084	-0.259
mqtls	Kidney	ZEB2	0.368	0.07	0.666
mqtls	Kidney	ZBTB33	-0.232	-0.475	0.012
mqtls	Kidney	RAD21	0.571	0.4	0.742
mqtls	Kidney	SOX6	-0.007	-0.28	0.266
mqtls	Kidney	HDAC6	-1.237	-2.01	-0.463
mqtls	Kidney	ETV6	-0.775	-1.256	-0.294
mqtls	Kidney	ZNF384	0.16	-0.248	0.569
mqtls	Kidney	PCBP2	-1.569	-2.985	-0.153
mqtls	Kidney	IRF2	-0.302	-1.008	0.404
mqtls	Kidney	ZMYM3	-0.433	-1.035	0.17
mqtls	Kidney	MNT	0.006	-0.154	0.166
mqtls	Kidney	REST	-0.202	-0.38	-0.024
mqtls	Kidney	MCM2	-2.487	-5.055	0.08
mqtls	Kidney	SRSF7	-0.203	-2.534	2.127
mqtls	Kidney	ZNF687	0	-0.289	0.289
mqtls	Kidney	ZBTB11	-0.333	-0.866	0.201
mqtls	Kidney	ZEB1	-1.583	-2.428	-0.739
mqtls	Kidney	NBN	0.06	-0.238	0.358
mqtls	Kidney	ZNF639	0.347	0.031	0.663
mqtls	Kidney	PTBP1	-0.905	-1.556	-0.255
mqtls	Kidney	SREBF2	-0.355	-0.975	0.266
mqtls	Kidney	MTA3	-0.065	-0.352	0.222
mqtls	Kidney	EED	-0.036	-0.362	0.291
mqtls	Kidney	SMARCE1	-0.374	-0.72	-0.028
mqtls	Kidney	NFATC1	-0.557	-1.183	0.069
mqtls	Kidney	CREBBP	-0.651	-6.34	5.038
mqtls	Kidney	AFF1	-0.539	-0.895	-0.183
mqtls	Kidney	CEBPB	0.333	-0.004	0.669
mqtls	Kidney	SIX5	-0.22	-0.725	0.285
mqtls	Kidney	NR2C1	0.142	-0.323	0.608
mqtls	Kidney	CREB1	0.394	0.15	0.638
mqtls	Kidney	LCORL	0.281	-0.66	1.221
mqtls	Kidney	ESRRA	-0.207	-0.507	0.092
mqtls	Kidney	NR2F1	0.244	-0.065	0.553
mqtls	Kidney	SPI1	0.288	-0.05	0.626
mqtls	Kidney	NR2F2	0.735	0.501	0.968
mqtls	Kidney	ATF3	-0.396	-0.655	-0.138
mqtls	Kidney	EGR1	0.1	-0.126	0.325
mqtls	Kidney	ZNF507	-0.593	-1.799	0.612
mqtls	Kidney	PHF21A	-1.11	-1.837	-0.382
mqtls	Kidney	MEF2C	-1.027	-2.035	-0.02
mqtls	Kidney	E4F1	-0.021	-0.303	0.261
mqtls	Kidney	U2AF1	-0.456	-0.932	0.019
mqtls	Kidney	ZHX2	0.298	-0.132	0.728
mqtls	Kidney	ZNF282	-1.169	-1.804	-0.533
mqtls	Kidney	DPF2	0.014	-0.182	0.21
mqtls	Kidney	NFYA	0.782	0.122	1.443
mqtls	Kidney	STAT3	0.477	0.166	0.789
mqtls	Kidney	GATAD2B	-0.173	-0.454	0.108
mqtls	Kidney	AGO1	-0.851	-1.25	-0.451
mqtls	Kidney	EBF1	0.492	0.075	0.91
mqtls	Kidney	KDM1A	0.139	-0.077	0.355
mqtls	Kidney	ZNF407	-0.601	-1.43	0.227
mqtls	Kidney	RB1	-0.606	-0.969	-0.243
mqtls	Kidney	HDAC3	0.333	-0.315	0.98
mqtls	Kidney	NANOG	0.134	-1.521	1.788
mqtls	Kidney	IKZF2	-0.057	-0.398	0.283
mqtls	Kidney	NFYB	0.316	-0.117	0.75
mqtls	Kidney	PRDM10	0.385	0.029	0.74
mqtls	Kidney	NCOR1	0.015	-0.228	0.257
mqtls	Kidney	MLLT1	-0.063	-0.357	0.231
mqtls	Kidney	RBM39	-0.018	-0.232	0.196
mqtls	Kidney	ZHX1	-0.709	-1.441	0.023
mqtls	Kidney	TRIM24	-0.032	-0.461	0.397
mqtls	Kidney	MCM5	-15.387	-56.295	25.521
mqtls	Kidney	STAT1	-0.242	-0.799	0.316
mqtls	Kidney	CBX2	-1	-2.21	0.211
mqtls	Kidney	HNF1A	-0.616	-1.45	0.219
mqtls	Kidney	ARNT	-0.089	-0.454	0.276
mqtls	Kidney	SMAD2	1.31	-1.204	3.824
mqtls	Kidney	CBX1	-0.31	-0.741	0.12
mqtls	Kidney	IRF4	0.873	0.377	1.368
mqtls	Kidney	RELB	-0.077	-0.433	0.279
mqtls	Kidney	BRCA1	-0.013	-0.878	0.853
mqtls	Kidney	MTA1	0.142	-0.308	0.591
mqtls	Kidney	MITF	-0.165	-0.712	0.382
mqtls	Kidney	MCM7	-0.308	-2.182	1.566
mqtls	Kidney	THRA	0.699	-1.26	2.659
mqtls	Kidney	STAT2	-0.266	-1.746	1.214
mqtls	Kidney	ZNF8	-12.899	-145.785	119.987
mqtls	Kidney	MCM3	1.536	-0.521	3.593
mqtls	Kidney	MEIS2	0.345	0.025	0.665
mqtls	Kidney	GATA2	0.218	-0.139	0.574
mqtls	Kidney	ELK1	-0.142	-0.565	0.281
mqtls	Kidney	HNRNPK	-0.457	-0.799	-0.115
mqtls	Kidney	PHB2	-0.2	-1.455	1.055
mqtls	Kidney	KAT2A	-23.12	-122.491	76.252
mqtls	Kidney	ZNF217	-0.563	-0.864	-0.263
mqtls	Kidney	RBBP5	-0.64	-0.936	-0.344
mqtls	Kidney	ZNF143	0.595	0.37	0.819
mqtls	Kidney	E2F7	-4.127	-7.239	-1.016
mqtls	Kidney	ZBTB7A	0.224	-0.045	0.493
mqtls	Kidney	ZNF207	0.136	-0.222	0.495
mqtls	Kidney	HNF4G	0.582	0.185	0.978
mqtls	Kidney	SMARCA5	-0.226	-0.583	0.132
mqtls	Kidney	NEUROD1	0.743	0.394	1.091
mqtls	Kidney	JUNB	-0.191	-0.73	0.348
mqtls	Kidney	TAL1	-0.554	-1.027	-0.081
mqtls	Kidney	SIN3B	-0.299	-0.68	0.083
mqtls	Kidney	ASH2L	-0.266	-0.46	-0.073
mqtls	Kidney	NCOA2	-1.926	-4.551	0.699
mqtls	Kidney	ZBTB1	-13.593	-39.811	12.626
mqtls	Kidney	BRD4	-0.842	-1.265	-0.418
mqtls	Kidney	ZBTB5	-1.306	-2.42	-0.193
mqtls	Kidney	SIN3A	0.046	-0.138	0.231
mqtls	Kidney	PAX5	0.498	0.091	0.905
mqtls	Kidney	CBFA2T2	0.112	-0.625	0.849
mqtls	Kidney	ZKSCAN1	-0.559	-1.116	-0.002
mqtls	Kidney	PHF20	-0.225	-0.6	0.15
mqtls	Kidney	ARID3A	0.005	-0.295	0.305
mqtls	Kidney	SRSF4	-1.298	-2.698	0.103
mqtls	Kidney	EHMT2	0.43	0.038	0.822
mqtls	Kidney	ZBTB2	0.33	-0.078	0.738
mqtls	Kidney	SAFB	0.334	-0.161	0.828
mqtls	Kidney	U2AF2	-0.174	-1.219	0.872
mqtls	Kidney	GATAD2A	-0.439	-1.02	0.142
mqtls	Kidney	BMI1	0.276	-0.206	0.759
mqtls	Kidney	RUNX3	-0.107	-0.44	0.226
mqtls	Kidney	FOXP1	1.31	0.234	2.385
mqtls	Kidney	EWSR1	-13.814	-47.097	19.47
mqtls	Kidney	NUFIP1	-2.816	-5.203	-0.429
mqtls	Kidney	RBM14	-0.489	-1.358	0.38
mqtls	Kidney	HNRNPUL1	-2.569	-4.01	-1.129
mqtls	Kidney	CBX3	-0.619	-1.03	-0.207
mqtls	Kidney	MAX	0.435	0.254	0.616
mqtls	Kidney	CBFA2T3	0.606	0.244	0.968
mqtls	Kidney	TCF12	0.037	-0.329	0.403
mqtls	Kidney	CREM	0.267	0.042	0.493
mqtls	Kidney	IRF5	-1.089	-3.386	1.208
mqtls	Kidney	IRF3	0.45	-0.108	1.008
mqtls	Kidney	E2F4	0.815	0.185	1.444
mqtls	Kidney	RBM22	-0.479	-0.895	-0.062
mqtls	Kidney	CBX8	-0.549	-2.764	1.666
mqtls	Kidney	ATM	-17.936	-59.18	23.307
mqtls	Kidney	ELF1	0.155	-0.079	0.39
mqtls	Kidney	E2F8	-0.861	-1.388	-0.335
mqtls	Kidney	HSF1	-1.737	-4.243	0.769
mqtls	Kidney	FOSL2	0.34	0.005	0.675
mqtls	Kidney	CBFB	-1.171	-1.65	-0.692
mqtls	Kidney	RBFOX2	-0.412	-0.58	-0.244
mqtls	Kidney	WHSC1	-0.301	-8.099	7.496
mqtls	Kidney	MTA2	0.137	-0.141	0.416
mqtls	Kidney	CHD4	-0.212	-0.647	0.224
mqtls	Kidney	KLF5	-0.081	-0.63	0.468
mqtls	Kidney	KLF16	0.229	-0.297	0.755
mqtls	Kidney	ZNF512B	-0.471	-1.424	0.483
mqtls	Kidney	SETDB1	0.766	0.243	1.29
mqtls	Kidney	SKIL	-0.522	-0.793	-0.25
mqtls	Kidney	SREBF1	-0.11	-0.803	0.583
mqtls	Kidney	NCOA1	-0.459	-0.781	-0.137
mqtls	Kidney	GMEB1	-0.574	-0.887	-0.261
mqtls	Kidney	CDC5L	-0.685	-1.776	0.405
mqtls	Kidney	NR2F6	0.579	0.304	0.854
mqtls	Kidney	EZH2	-0.255	-0.478	-0.033
mqtls	Kidney	FOXK2	0.415	0.123	0.707
mqtls	Kidney	HDAC2	0.169	-0.013	0.352
mqtls	Kidney	MYC	-0.087	-0.289	0.114
mqtls	Kidney	ZNF263	-0.689	-1.015	-0.362
mqtls	Kidney	BHLHE40	0.25	0.028	0.472
mqtls	Kidney	RXRA	0.344	0.13	0.557
mqtls	Kidney	MYNN	0.23	-0.227	0.687
mqtls	Kidney	TBX21	0.183	-0.184	0.55
mqtls	Kidney	KAT2B	-11.469	-29.861	6.923
mqtls	Kidney	ZNF574	-0.181	-1.345	0.983
mqtls	Kidney	SIX4	-0.364	-2.328	1.599
mqtls	Kidney	TBX3	-0.085	-1.114	0.945
mqtls	Kidney	DNMT1	-0.504	-1.449	0.441
mqtls	Kidney	HDAC1	0.043	-0.206	0.291
mqtls	Kidney	ZFX	-0.344	-0.583	-0.105
mqtls	Kidney	ARHGAP35	-1.287	-2.502	-0.072
mqtls	Kidney	FOXA2	0.12	-0.262	0.501
mqtls	Kidney	TBL1XR1	0.068	-0.351	0.487
mqtls	Kidney	POLR2G	-0.075	-0.264	0.113
mqtls	Kidney	ZNF444	-0.123	-0.586	0.341
mqtls	Kidney	IKZF1	0.114	-0.066	0.295
mqtls	Kidney	L3MBTL2	0.222	0.017	0.426
mqtls	Kidney	ASH1L	0.676	0.198	1.154
mqtls	Kidney	PBX3	0.427	-0.119	0.974
mqtls	Kidney	KDM5A	-1.346	-1.727	-0.966
mqtls	Kidney	RAD51	-0.34	-0.757	0.077
mqtls	Kidney	PHF8	-0.136	-0.35	0.079
mqtls	Kidney	HNRNPH1	-0.953	-2.568	0.662
mqtls	Kidney	WRNIP1	-0.938	-1.831	-0.045
mqtls	Kidney	PAX8	-7.559	-12.456	-2.662
mqtls	Kidney	MXI1	0.062	-0.163	0.287
mqtls	Kidney	TCF7L2	-0.486	-0.915	-0.056
mqtls	Kidney	RUNX1	-1.102	-2.002	-0.203
mqtls	Kidney	SIRT6	2.219	0.339	4.098
mqtls	Kidney	AGO2	-0.544	-0.864	-0.225
mqtls	Kidney	NCOA6	-0.175	-1.963	1.614
mqtls	Kidney	RBM25	-0.147	-0.71	0.415
mqtls	Kidney	RCOR1	0.576	0.295	0.856
mqtls	Kidney	BCOR	-0.615	-1.015	-0.215
mqtls	Kidney	SMAD5	-0.382	-0.705	-0.059
mqtls	Kidney	DACH1	1.145	0.694	1.595
mqtls	Kidney	RFX1	0.036	-0.297	0.369
mqtls	Kidney	HMBOX1	0.231	-0.199	0.661
mqtls	Kidney	LEF1	-0.061	-0.693	0.572
mqtls	Kidney	SOX13	-0.112	-0.95	0.726
mqtls	Kidney	NR2C2	1.011	-0.086	2.108
mqtls	Kidney	STAT5A	-0.866	-1.356	-0.376
mqtls	Kidney	SMARCA4	0.377	0.154	0.6
mqtls	Kidney	HES1	-0.203	-0.843	0.438
mqtls	Kidney	USF1	0.658	0.338	0.978
mqtls	Kidney	ZNF318	0.032	-0.625	0.688
mqtls	Kidney	KDM4B	-0.865	-1.369	-0.361
mqtls	Kidney	SMC3	0.043	-0.26	0.345
mqtls	Kidney	GATA3	0.51	0.241	0.78
mqtls	Kidney	ELF4	0.363	0.064	0.663
mqtls	Kidney	JUND	0.14	-0.045	0.324
mqtls	Kidney	PRPF4	-0.569	-1.01	-0.128
mqtls	Kidney	DEAF1	0.404	-0.185	0.994
mqtls	Kidney	TFAP4	-0.263	-0.655	0.128
mqtls	Kidney	ZNF184	-0.223	-0.703	0.256
mqtls	Kidney	ETV4	0.014	-0.296	0.324
mqtls	Kidney	GATA4	0.015	-0.336	0.365
mqtls	Kidney	TBP	0.203	0.008	0.399
mqtls	Kidney	NRF1	-0.381	-0.571	-0.191
mqtls	Kidney	ZNF830	-1.207	-2.318	-0.095
mqtls	Kidney	FUS	-0.639	-1.153	-0.126
mqtls	Kidney	CTCF	0.197	0.079	0.315
mqtls	Kidney	NFE2L2	0.326	-0.162	0.815
mqtls	Kidney	MIER1	-0.093	-1.187	1
mqtls	Kidney	HCFC1	-0.726	-1.066	-0.386
mqtls	Kidney	RFX5	0.338	0.027	0.648
mqtls	Kidney	BRD9	-0.448	-0.899	0.004
mqtls	Kidney	ZSCAN29	-0.781	-1.233	-0.33
mqtls	Kidney	SMARCB1	-1.038	-2.702	0.625
mqtls	Kidney	BATF	0.441	-0.257	1.139
mqtls	Kidney	XRCC3	-10.06	-26.821	6.701
mqtls	Kidney	TCF7	-0.399	-0.929	0.13
mqtls	Kidney	ZFP91	-0.417	-1.039	0.205
mqtls	Kidney	SMARCC2	0.646	0.157	1.136
mqtls	Kidney	COPS2	-5.652	-14.023	2.72
mqtls	Kidney	SKI	-0.389	-0.7	-0.078
mqtls	Kidney	YY1	0.235	0.07	0.4
mqtls	Kidney	ATF2	-0.291	-0.592	0.011
mqtls	Kidney	FOXA1	0.62	0.381	0.858
mqtls	Kidney	FIP1L1	-0.67	-1.059	-0.28
mqtls	Kidney	SP1	0.188	0.024	0.352
mqtls	Kidney	ZBED1	-0.595	-1.12	-0.069
mqtls	Kidney	SUPT20H	-24.614	-94.386	45.158
mqtls	Kidney	ESR1	0.698	0.263	1.134
mqtls	Kidney	CHAMP1	0.588	0.151	1.026
mqtls	Kidney	HNRNPL	-0.452	-0.768	-0.137
mqtls	Kidney	SUZ12	-0.416	-0.705	-0.128
mqtls	Kidney	ARID2	-0.272	-1.066	0.522
mqtls	Kidney	BCL3	-0.37	-0.827	0.087
mqtls	Kidney	ZNF592	0.309	0.022	0.595
mqtls	Kidney	SMAD1	-0.891	-1.373	-0.409
mqtls	Kidney	SRF	0.741	0.375	1.107
mqtls	Kidney	SRSF9	-5.116	-78.906	68.675
mqtls	Kidney	PLRG1	-4.836	-38.409	28.737
mqtls	Kidney	MAFF	-0.048	-0.549	0.453
mqtls	Kidney	HNF4A	0.547	0.297	0.797
mqtls	Kidney	CBX5	-0.488	-1.191	0.214
mqtls	Kidney	GATA1	-0.761	-1.133	-0.389
mqtls	Kidney	FOSL1	0.414	-0.55	1.378
mqtls	Kidney	IRF1	0.028	-0.247	0.303
mqtls	Kidney	SNRNP70	-0.397	-3.218	2.423
mqtls	Lung	C11orf30	-0.325	-0.507	-0.143
mqtls	Lung	ZNF280A	-1.831	-3.174	-0.488
mqtls	Lung	FOS	0.659	0.535	0.784
mqtls	Lung	TAF15	-0.34	-0.518	-0.162
mqtls	Lung	CUX1	0.584	0.344	0.824
mqtls	Lung	NCOA3	0.37	-0.311	1.051
mqtls	Lung	KAT8	0.795	0.235	1.355
mqtls	Lung	NFATC3	-0.076	-0.254	0.102
mqtls	Lung	GABPA	-0.056	-0.192	0.08
mqtls	Lung	CCAR2	-0.473	-0.968	0.022
mqtls	Lung	UBTF	-0.198	-0.376	-0.019
mqtls	Lung	CLOCK	-0.579	-0.806	-0.351
mqtls	Lung	TRIP13	0.759	0.061	1.458
mqtls	Lung	ZNF579	-0.164	-0.411	0.082
mqtls	Lung	TEAD4	0.531	0.34	0.723
mqtls	Lung	RBM15	-0.165	-2.035	1.705
mqtls	Lung	ZBTB7B	0.235	-0.108	0.578
mqtls	Lung	MAFK	0.038	-0.155	0.23
mqtls	Lung	CHD7	-0.206	-0.734	0.323
mqtls	Lung	ZNF274	0.188	-0.311	0.687
mqtls	Lung	RBM34	0.681	-0.129	1.492
mqtls	Lung	MGA	0.499	0.351	0.647
mqtls	Lung	GABPB1	-0.281	-0.437	-0.125
mqtls	Lung	PML	-0.116	-0.303	0.072
mqtls	Lung	MYBL2	0.121	-0.418	0.66
mqtls	Lung	NFIB	0.018	-0.237	0.274
mqtls	Lung	NCOA4	-0.046	-0.638	0.546
mqtls	Lung	EP400	-0.145	-0.29	-0.001
mqtls	Lung	ZNF316	0.231	0.044	0.419
mqtls	Lung	MBD2	0.116	-0.073	0.304
mqtls	Lung	E2F1	-0.017	-0.176	0.143
mqtls	Lung	SAP30	-0.586	-0.766	-0.406
mqtls	Lung	RNF2	0.007	-0.086	0.099
mqtls	Lung	TRIM28	-0.052	-0.212	0.108
mqtls	Lung	EP300	0.514	0.425	0.604
mqtls	Lung	KDM4A	-0.273	-0.392	-0.155
mqtls	Lung	XRCC5	-0.113	-0.26	0.033
mqtls	Lung	KDM5B	-0.078	-0.24	0.085
mqtls	Lung	MEF2A	0.259	-0.002	0.521
mqtls	Lung	ZBTB40	-0.218	-0.379	-0.057
mqtls	Lung	TAF1	-0.167	-0.266	-0.068
mqtls	Lung	THAP1	-0.593	-1.012	-0.174
mqtls	Lung	ZBTB8A	-0.601	-2.472	1.27
mqtls	Lung	JUN	0.174	-0.025	0.372
mqtls	Lung	USF2	0.19	-0.023	0.404
mqtls	Lung	NR3C1	0.085	-0.099	0.269
mqtls	Lung	NFIC	0.113	-0.022	0.248
mqtls	Lung	ATF4	-0.163	-0.445	0.12
mqtls	Lung	POLR2A	0.168	0.102	0.234
mqtls	Lung	NFE2	0.861	0.627	1.095
mqtls	Lung	NFXL1	-0.128	-0.602	0.346
mqtls	Lung	SAFB2	-16.107	-2516.59	2484.38
mqtls	Lung	TAF9B	-0.685	-0.904	-0.467
mqtls	Lung	ZNF24	0.074	-0.065	0.213
mqtls	Lung	MYB	0.202	-0.324	0.727
mqtls	Lung	NFRKB	-0.092	-0.271	0.088
mqtls	Lung	CC2D1A	0.003	-0.179	0.186
mqtls	Lung	ZZZ3	-0.004	-0.37	0.362
mqtls	Lung	TAF7	-0.153	-0.368	0.062
mqtls	Lung	ZEB2	0.088	-0.088	0.264
mqtls	Lung	ZBTB33	-0.15	-0.278	-0.023
mqtls	Lung	RAD21	0.416	0.322	0.511
mqtls	Lung	SOX6	-0.232	-0.413	-0.052
mqtls	Lung	HDAC6	-0.821	-1.156	-0.487
mqtls	Lung	ETV6	0.227	0.018	0.435
mqtls	Lung	ZNF384	-0.005	-0.166	0.156
mqtls	Lung	PCBP2	-1.255	-1.908	-0.602
mqtls	Lung	IRF2	0.423	0.128	0.718
mqtls	Lung	ZMYM3	0.073	-0.253	0.398
mqtls	Lung	MNT	0.13	0.03	0.23
mqtls	Lung	REST	0.063	-0.034	0.161
mqtls	Lung	MCM2	-2.172	-3.427	-0.917
mqtls	Lung	SRSF7	-13.097	-22.788	-3.406
mqtls	Lung	ZNF687	0.095	-0.046	0.235
mqtls	Lung	ZBTB11	-0.443	-0.708	-0.179
mqtls	Lung	ZEB1	-0.943	-1.319	-0.567
mqtls	Lung	NBN	0.031	-0.112	0.174
mqtls	Lung	ZNF639	-0.235	-0.415	-0.054
mqtls	Lung	PTBP1	-0.408	-0.733	-0.082
mqtls	Lung	MEF2C	-0.328	-0.753	0.097
mqtls	Lung	E4F1	-0.073	-0.236	0.091
mqtls	Lung	U2AF1	-0.543	-0.774	-0.312
mqtls	Lung	ZHX2	0.436	0.234	0.639
mqtls	Lung	ZNF282	-0.897	-1.17	-0.624
mqtls	Lung	DPF2	0.179	0.07	0.289
mqtls	Lung	NFYA	-0.743	-1.419	-0.067
mqtls	Lung	STAT3	0.336	0.15	0.522
mqtls	Lung	GATAD2B	0.025	-0.154	0.204
mqtls	Lung	AGO1	-0.621	-0.802	-0.441
mqtls	Lung	EBF1	0.373	0.11	0.637
mqtls	Lung	KDM1A	0.006	-0.092	0.104
mqtls	Lung	ZNF407	-0.283	-0.661	0.095
mqtls	Lung	RB1	-0.256	-0.416	-0.096
mqtls	Lung	HDAC3	-0.338	-0.677	0
mqtls	Lung	NANOG	0.382	-0.009	0.774
mqtls	Lung	IKZF2	-0.13	-0.273	0.014
mqtls	Lung	NFYB	-0.148	-0.463	0.166
mqtls	Lung	PRDM10	0.514	0.336	0.693
mqtls	Lung	NCOR1	0.355	0.22	0.491
mqtls	Lung	MLLT1	-0.168	-0.301	-0.035
mqtls	Lung	RBM39	-0.108	-0.237	0.02
mqtls	Lung	ZHX1	-0.379	-0.697	-0.06
mqtls	Lung	TRIM24	0.152	-0.049	0.353
mqtls	Lung	MCM5	-9.203	-25.209	6.803
mqtls	Lung	STAT1	-0.123	-0.379	0.133
mqtls	Lung	CBX2	-0.757	-1.379	-0.135
mqtls	Lung	HNF1A	0.176	-0.158	0.51
mqtls	Lung	ARNT	0.112	-0.042	0.266
mqtls	Lung	SMAD2	0.868	-0.957	2.694
mqtls	Lung	CBX1	0.048	-0.176	0.272
mqtls	Lung	IRF4	0.83	0.557	1.102
mqtls	Lung	RELB	-0.284	-0.441	-0.128
mqtls	Lung	BRCA1	-0.118	-0.649	0.413
mqtls	Lung	MTA1	0.024	-0.645	0.694
mqtls	Lung	MITF	0.258	0.035	0.481
mqtls	Lung	MCM7	0.024	-0.595	0.643
mqtls	Lung	THRA	0.645	-0.207	1.497
mqtls	Lung	STAT2	-0.414	-0.963	0.134
mqtls	Lung	ZNF8	-15.652	-141.766	110.461
mqtls	Lung	MCM3	1.665	0.681	2.648
mqtls	Lung	MEIS2	0.249	0.065	0.433
mqtls	Lung	GATA2	0.164	-0.029	0.358
mqtls	Lung	ELK1	-0.231	-0.453	-0.009
mqtls	Lung	HNRNPK	-0.515	-0.707	-0.324
mqtls	Lung	PHB2	-0.053	-0.533	0.426
mqtls	Lung	KAT2A	-10.881	-23.186	1.425
mqtls	Lung	ZNF217	-0.128	-0.284	0.029
mqtls	Lung	RBBP5	-0.261	-0.402	-0.119
mqtls	Lung	ZNF143	0.375	0.245	0.506
mqtls	Lung	E2F7	-0.737	-1.317	-0.158
mqtls	Lung	ZBTB7A	0.228	0.084	0.372
mqtls	Lung	ZNF207	-0.259	-0.459	-0.059
mqtls	Lung	HNF4G	0.507	0.293	0.722
mqtls	Lung	SMARCA5	0.054	-0.14	0.247
mqtls	Lung	NEUROD1	0.661	0.448	0.874
mqtls	Lung	JUNB	0.183	-0.064	0.429
mqtls	Lung	TAL1	-0.218	-0.439	0.004
mqtls	Lung	SIN3B	-0.681	-0.894	-0.468
mqtls	Lung	ASH2L	-0.006	-0.091	0.079
mqtls	Lung	NCOA2	-0.558	-1.422	0.306
mqtls	Lung	ZBTB1	1.04	-0.352	2.432
mqtls	Lung	BRD4	-0.476	-0.684	-0.267
mqtls	Lung	ZBTB5	-0.302	-0.767	0.163
mqtls	Lung	SIN3A	-0.052	-0.148	0.043
mqtls	Lung	PAX5	0.202	-0.031	0.434
mqtls	Lung	CBFA2T2	0.155	-0.141	0.451
mqtls	Lung	ZKSCAN1	-0.102	-0.4	0.196
mqtls	Lung	PHF20	-0.239	-0.444	-0.034
mqtls	Lung	ARID3A	-0.064	-0.258	0.129
mqtls	Lung	SRSF4	0.182	-0.356	0.72
mqtls	Lung	EHMT2	0.241	0.005	0.477
mqtls	Lung	ZBTB2	-0.1	-0.347	0.148
mqtls	Lung	SAFB	-0.379	-0.7	-0.058
mqtls	Lung	U2AF2	-0.034	-0.471	0.404
mqtls	Lung	GATAD2A	0.089	-0.235	0.412
mqtls	Lung	BMI1	-0.152	-0.443	0.14
mqtls	Lung	RUNX3	0.479	0.317	0.641
mqtls	Lung	FOXP1	0.486	-0.418	1.391
mqtls	Lung	EWSR1	-0.425	-5.614	4.764
mqtls	Lung	NUFIP1	-0.119	-0.672	0.433
mqtls	Lung	RBM14	-0.714	-1.178	-0.249
mqtls	Lung	HNRNPUL1	-1.01	-1.535	-0.485
mqtls	Lung	CBX3	-0.241	-0.438	-0.044
mqtls	Lung	MAX	0.08	-0.021	0.18
mqtls	Lung	CBFA2T3	0.754	0.564	0.943
mqtls	Lung	TCF12	-0.071	-0.194	0.051
mqtls	Lung	CREM	0.373	0.249	0.497
mqtls	Lung	IRF5	-0.18	-1.27	0.91
mqtls	Lung	IRF3	0.008	-0.293	0.309
mqtls	Lung	E2F4	-0.624	-1.053	-0.195
mqtls	Lung	RBM22	-0.487	-0.705	-0.269
mqtls	Lung	CBX8	-4.57	-8.655	-0.486
mqtls	Lung	ATM	-0.566	-4.382	3.25
mqtls	Lung	ELF1	0.257	0.132	0.381
mqtls	Lung	E2F8	0.058	-0.17	0.286
mqtls	Lung	HSF1	-0.504	-1.114	0.105
mqtls	Lung	FOSL2	0.158	-0.034	0.349
mqtls	Lung	CBFB	-0.434	-0.639	-0.228
mqtls	Lung	RBFOX2	-0.207	-0.299	-0.115
mqtls	Lung	WHSC1	0.591	-0.169	1.35
mqtls	Lung	MTA2	0.109	-0.042	0.261
mqtls	Lung	CHD4	0.281	0.074	0.488
mqtls	Lung	KLF5	-0.59	-0.837	-0.343
mqtls	Lung	KLF16	0.02	-0.256	0.297
mqtls	Lung	ZNF512B	-0.065	-1.134	1.005
mqtls	Lung	SETDB1	-0.621	-1.051	-0.19
mqtls	Lung	SKIL	-0.092	-0.246	0.063
mqtls	Lung	SREBF1	0.094	-0.186	0.373
mqtls	Lung	NCOA1	-0.303	-0.478	-0.129
mqtls	Lung	GMEB1	-0.208	-0.366	-0.05
mqtls	Lung	CDC5L	-0.14	-0.678	0.399
mqtls	Lung	NR2F6	0.431	0.266	0.597
mqtls	Lung	EZH2	-0.142	-0.26	-0.023
mqtls	Lung	FOXK2	-0.091	-0.269	0.087
mqtls	Lung	HDAC2	0.101	0	0.201
mqtls	Lung	MYC	-0.078	-0.184	0.028
mqtls	Lung	ZNF263	-0.185	-0.346	-0.025
mqtls	Lung	BHLHE40	0.343	0.22	0.465
mqtls	Lung	RXRA	0.326	0.203	0.449
mqtls	Lung	MYNN	-0.201	-0.467	0.064
mqtls	Lung	TBX21	0.173	-0.025	0.371
mqtls	Lung	KAT2B	0.51	-0.485	1.505
mqtls	Lung	ZNF574	-0.24	-0.681	0.2
mqtls	Lung	SIX4	-1.901	-3.249	-0.552
mqtls	Lung	TBX3	-0.336	-0.635	-0.037
mqtls	Lung	DNMT1	-0.036	-0.447	0.376
mqtls	Lung	HDAC1	0.178	0.075	0.28
mqtls	Lung	ZFX	-0.275	-0.397	-0.153
mqtls	Lung	ARHGAP35	-1.752	-2.532	-0.972
mqtls	Lung	FOXA2	0.318	0.136	0.5
mqtls	Lung	TBL1XR1	-0.204	-0.379	-0.029
mqtls	Lung	POLR2G	-0.021	-0.132	0.09
mqtls	Lung	ZNF444	0.209	0.009	0.41
mqtls	Lung	IKZF1	0.332	0.239	0.425
mqtls	Lung	L3MBTL2	0.172	0.065	0.279
mqtls	Lung	ASH1L	0.172	-0.131	0.476
mqtls	Lung	PBX3	-0.353	-0.76	0.055
mqtls	Lung	KDM5A	-0.979	-1.156	-0.802
mqtls	Lung	RAD51	0.094	-0.112	0.301
mqtls	Lung	PHF8	0.081	-0.029	0.191
mqtls	Lung	HNRNPH1	-0.711	-1.408	-0.014
mqtls	Lung	WRNIP1	-0.584	-1.019	-0.149
mqtls	Lung	PAX8	-1.358	-2.119	-0.597
mqtls	Lung	MXI1	-0.275	-0.385	-0.165
mqtls	Lung	TCF7L2	-0.202	-0.405	0
mqtls	Lung	RUNX1	-0.593	-0.959	-0.227
mqtls	Lung	SIRT6	0.224	-1.301	1.749
mqtls	Lung	AGO2	-0.474	-0.636	-0.312
mqtls	Lung	NCOA6	-0.662	-1.278	-0.046
mqtls	Lung	RBM25	-0.516	-0.83	-0.202
mqtls	Lung	RCOR1	0.326	0.165	0.487
mqtls	Lung	BCOR	-0.157	-0.361	0.047
mqtls	Lung	SMAD5	0.121	-0.031	0.272
mqtls	Lung	DACH1	-0.356	-0.684	-0.028
mqtls	Lung	RFX1	0.473	0.3	0.646
mqtls	Lung	HMBOX1	0.362	0.139	0.586
mqtls	Lung	LEF1	0.525	0.354	0.697
mqtls	Lung	SOX13	0.248	-0.145	0.64
mqtls	Lung	NR2C2	0.825	0.231	1.42
mqtls	Lung	STAT5A	-0.392	-0.637	-0.148
mqtls	Lung	SMARCA4	0.213	0.089	0.337
mqtls	Lung	HES1	0.034	-0.74	0.807
mqtls	Lung	USF1	0.408	0.213	0.604
mqtls	Lung	ZNF318	0.076	-0.312	0.463
mqtls	Lung	KDM4B	-0.792	-1.054	-0.53
mqtls	Lung	SMC3	0.114	-0.011	0.24
mqtls	Lung	GATA3	0.237	0.073	0.402
mqtls	Lung	ELF4	0.169	-0.004	0.342
mqtls	Lung	JUND	0.166	0.062	0.27
mqtls	Lung	PRPF4	-0.87	-1.118	-0.622
mqtls	Lung	DEAF1	-0.343	-0.731	0.045
mqtls	Lung	TFAP4	-0.309	-0.517	-0.101
mqtls	Lung	ZNF184	-0.142	-0.426	0.143
mqtls	Lung	ETV4	0.409	0.232	0.587
mqtls	Lung	GATA4	0.253	0.054	0.452
mqtls	Lung	TBP	0.084	-0.026	0.195
mqtls	Lung	NRF1	-0.098	-0.204	0.008
mqtls	Lung	ZNF830	-0.742	-1.304	-0.179
mqtls	Lung	FUS	-0.427	-0.687	-0.167
mqtls	Lung	CTCF	0.239	0.173	0.305
mqtls	Lung	NFE2L2	-0.061	-0.361	0.238
mqtls	Lung	MIER1	-0.138	-0.432	0.156
mqtls	Lung	HCFC1	-0.588	-0.763	-0.413
mqtls	Lung	RFX5	-0.442	-0.626	-0.257
mqtls	Lung	BRD9	-0.419	-0.637	-0.201
mqtls	Lung	ZSCAN29	-0.3	-0.506	-0.093
mqtls	Lung	SMARCB1	-1.115	-1.928	-0.302
mqtls	Lung	BATF	0.253	-0.099	0.606
mqtls	Lung	XRCC3	-0.706	-2.41	0.997
mqtls	Lung	TCF7	0.091	-0.163	0.344
mqtls	Lung	ZFP91	-0.024	-0.268	0.22
mqtls	Lung	SMARCC2	0.695	0.458	0.933
mqtls	Lung	COPS2	-4.23	-8.484	0.024
mqtls	Lung	SKI	0.076	-0.083	0.234
mqtls	Lung	YY1	-0.099	-0.191	-0.008
mqtls	Lung	ATF2	0.175	0.021	0.33
mqtls	Lung	FOXA1	0.265	0.125	0.404
mqtls	Lung	FIP1L1	-0.183	-0.359	-0.008
mqtls	Lung	SP1	0.471	0.378	0.564
mqtls	Lung	ZBED1	-0.207	-0.44	0.026
mqtls	Lung	SUPT20H	-7.414	-18.855	4.027
mqtls	Lung	ESR1	0.928	0.7	1.155
mqtls	Lung	CHAMP1	0.056	-0.27	0.381
mqtls	Lung	HNRNPL	-0.322	-0.484	-0.159
mqtls	Lung	SUZ12	-0.299	-0.453	-0.146
mqtls	Lung	ARID2	-0.1	-0.507	0.307
mqtls	Lung	BCL3	-0.067	-0.29	0.157
mqtls	Lung	ZNF592	0.49	0.349	0.63
mqtls	Lung	SMAD1	-0.277	-0.497	-0.056
mqtls	Lung	SRF	0.183	-0.046	0.412
mqtls	Lung	SRSF9	-19.706	-225.501	186.09
mqtls	Lung	PLRG1	1.428	-2.534	5.391
mqtls	Lung	MAFF	0.463	0.231	0.695
mqtls	Lung	HNF4A	0.332	0.192	0.473
mqtls	Lung	CBX5	-0.384	-0.739	-0.029
mqtls	Lung	GATA1	-0.459	-0.634	-0.284
mqtls	Lung	FOSL1	0.548	0.107	0.989
mqtls	Lung	IRF1	-0.149	-0.307	0.009
mqtls	Lung	SNRNP70	-1.602	-2.922	-0.282
mqtls	Muscle	C11orf30	0.057	-0.388	0.502
mqtls	Muscle	ZNF280A	-0.196	-1.745	1.352
mqtls	Muscle	FOS	0.244	0	0.488
mqtls	Muscle	TAF15	-0.05	-0.518	0.419
mqtls	Muscle	CUX1	-0.199	-0.756	0.357
mqtls	Muscle	NCOA3	1.156	0.184	2.128
mqtls	Muscle	KAT8	-1.297	-3.216	0.622
mqtls	Muscle	NFATC3	-0.182	-0.504	0.14
mqtls	Muscle	GABPA	-0.199	-0.443	0.045
mqtls	Muscle	CCAR2	0.31	-0.413	1.033
mqtls	Muscle	UBTF	0.194	-0.11	0.499
mqtls	Muscle	CLOCK	-0.83	-1.283	-0.376
mqtls	Muscle	TRIP13	1.069	0.067	2.071
mqtls	Muscle	ZNF579	-0.25	-0.744	0.244
mqtls	Muscle	TEAD4	0.691	0.341	1.042
mqtls	Muscle	RBM15	0.002	-1.887	1.892
mqtls	Muscle	ZBTB7B	-0.076	-0.655	0.503
mqtls	Muscle	MAFK	0.116	-0.214	0.446
mqtls	Muscle	CHD7	0.162	-1.429	1.753
mqtls	Muscle	ZNF274	-0.344	-1.491	0.804
mqtls	Muscle	RBM34	0.681	-0.619	1.981
mqtls	Muscle	MGA	0.291	0.008	0.573
mqtls	Muscle	GABPB1	-0.23	-0.509	0.048
mqtls	Muscle	PML	-0.428	-0.779	-0.076
mqtls	Muscle	MYBL2	0.753	0.062	1.443
mqtls	Muscle	NFIB	0.393	-0.063	0.849
mqtls	Muscle	NCOA4	-0.458	-1.902	0.986
mqtls	Muscle	EP400	0.067	-0.236	0.37
mqtls	Muscle	ZNF316	0.182	-0.177	0.54
mqtls	Muscle	MBD2	0.464	0.153	0.774
mqtls	Muscle	E2F1	-0.136	-0.473	0.202
mqtls	Muscle	SAP30	-0.231	-0.538	0.075
mqtls	Muscle	RNF2	-0.101	-0.305	0.103
mqtls	Muscle	TRIM28	-0.015	-0.266	0.236
mqtls	Muscle	EP300	0.291	0.126	0.456
mqtls	Muscle	KDM4A	0.102	-0.105	0.31
mqtls	Muscle	XRCC5	-0.151	-0.42	0.118
mqtls	Muscle	KDM5B	-0.404	-0.687	-0.12
mqtls	Muscle	MEF2A	0.235	-0.256	0.725
mqtls	Muscle	ZBTB40	-0.131	-0.436	0.174
mqtls	Muscle	TAF1	-0.253	-0.425	-0.082
mqtls	Muscle	THAP1	0.952	0.442	1.462
mqtls	Muscle	ZBTB8A	0.31	-6.904	7.523
mqtls	Muscle	JUN	0.821	0.502	1.139
mqtls	Muscle	USF2	-0.09	-0.585	0.404
mqtls	Muscle	NR3C1	0.114	-0.203	0.431
mqtls	Muscle	NFIC	0.05	-0.288	0.388
mqtls	Muscle	ATF4	-0.926	-1.546	-0.307
mqtls	Muscle	POLR2A	0.103	-0.017	0.222
mqtls	Muscle	NFE2	0.01	-0.452	0.473
mqtls	Muscle	NFXL1	-0.426	-1.406	0.554
mqtls	Muscle	SAFB2	-19.831	-751.174	711.511
mqtls	Muscle	TAF9B	-0.889	-1.273	-0.505
mqtls	Muscle	ZNF24	-0.298	-0.545	-0.051
mqtls	Muscle	MYB	0.017	-0.72	0.755
mqtls	Muscle	NFRKB	-0.065	-0.484	0.354
mqtls	Muscle	CC2D1A	0.468	0.091	0.845
mqtls	Muscle	ZZZ3	-8.154	-11.447	-4.86
mqtls	Muscle	TAF7	0.659	0.336	0.981
mqtls	Muscle	ZEB2	0.273	-0.043	0.589
mqtls	Muscle	ZBTB33	-0.068	-0.327	0.19
mqtls	Muscle	RAD21	0.611	0.445	0.777
mqtls	Muscle	SOX6	0.197	-0.122	0.516
mqtls	Muscle	HDAC6	-0.482	-1.021	0.058
mqtls	Muscle	ETV6	-0.46	-0.887	-0.033
mqtls	Muscle	ZNF384	0.409	0.06	0.758
mqtls	Muscle	PCBP2	-5.34	-8.89	-1.79
mqtls	Muscle	IRF2	-0.528	-1.109	0.054
mqtls	Muscle	ZMYM3	-0.773	-1.453	-0.093
mqtls	Muscle	MNT	-0.177	-0.36	0.007
mqtls	Muscle	REST	-0.044	-0.248	0.161
mqtls	Muscle	MCM2	-5.305	-10.208	-0.402
mqtls	Muscle	SRSF7	0.001	-1.451	1.452
mqtls	Muscle	ZNF687	0.277	0.033	0.522
mqtls	Muscle	ZBTB11	-0.238	-0.751	0.274
mqtls	Muscle	ZEB1	-0.742	-1.431	-0.054
mqtls	Muscle	NBN	-0.088	-0.353	0.176
mqtls	Muscle	ZNF639	0.072	-0.349	0.493
mqtls	Muscle	PTBP1	-0.536	-1.104	0.031
mqtls	Muscle	SREBF2	-0.438	-1.048	0.172
mqtls	Muscle	MTA3	-0.337	-0.579	-0.094
mqtls	Muscle	EED	0.113	-0.25	0.476
mqtls	Muscle	SMARCE1	-0.283	-0.612	0.047
mqtls	Muscle	NFATC1	-0.412	-0.998	0.174
mqtls	Muscle	CREBBP	2.013	-2.312	6.339
mqtls	Muscle	AFF1	0.187	-0.147	0.52
mqtls	Muscle	CEBPB	0.496	0.171	0.821
mqtls	Muscle	SIX5	-0.421	-0.834	-0.009
mqtls	Muscle	NR2C1	0.081	-0.479	0.642
mqtls	Muscle	CREB1	0.478	0.232	0.724
mqtls	Muscle	LCORL	0.173	-0.822	1.168
mqtls	Muscle	ESRRA	0.221	-0.057	0.499
mqtls	Muscle	NR2F1	0.15	-0.183	0.483
mqtls	Muscle	SPI1	0.253	-0.077	0.583
mqtls	Muscle	NR2F2	0.488	0.251	0.725
mqtls	Muscle	ATF3	-0.512	-0.774	-0.251
mqtls	Muscle	EGR1	0.021	-0.177	0.218
mqtls	Muscle	ZNF507	0.245	-0.921	1.41
mqtls	Muscle	PHF21A	-0.678	-1.315	-0.041
mqtls	Muscle	MEF2C	-0.688	-1.552	0.176
mqtls	Muscle	E4F1	-0.001	-0.252	0.25
mqtls	Muscle	U2AF1	-0.323	-0.758	0.112
mqtls	Muscle	ZHX2	0.521	0.147	0.896
mqtls	Muscle	ZNF282	-0.815	-1.319	-0.311
mqtls	Muscle	DPF2	0.353	0.145	0.56
mqtls	Muscle	NFYA	0.837	-0.046	1.72
mqtls	Muscle	STAT3	0.026	-0.307	0.358
mqtls	Muscle	GATAD2B	-0.436	-0.688	-0.184
mqtls	Muscle	AGO1	-0.334	-0.649	-0.019
mqtls	Muscle	EBF1	0.523	0.083	0.962
mqtls	Muscle	KDM1A	0.056	-0.198	0.309
mqtls	Muscle	ZNF407	-0.538	-1.3	0.224
mqtls	Muscle	RB1	-0.042	-1.338	1.253
mqtls	Muscle	HDAC3	0.717	0.152	1.282
mqtls	Muscle	NANOG	0.803	0.163	1.443
mqtls	Muscle	IKZF2	-0.145	-0.413	0.122
mqtls	Muscle	NFYB	-0.032	-0.48	0.415
mqtls	Muscle	PRDM10	-0.097	-0.517	0.324
mqtls	Muscle	NCOR1	-0.123	-0.401	0.156
mqtls	Muscle	MLLT1	-0.115	-0.373	0.143
mqtls	Muscle	RBM39	0.207	-0.013	0.427
mqtls	Muscle	ZHX1	1.017	0.51	1.525
mqtls	Muscle	TRIM24	0.117	-0.358	0.591
mqtls	Muscle	MCM5	-7.157	-31.854	17.541
mqtls	Muscle	STAT1	-0.063	-0.49	0.364
mqtls	Muscle	CBX2	-1.123	-2.25	0.003
mqtls	Muscle	HNF1A	-2.175	-3.311	-1.039
mqtls	Muscle	ARNT	-0.038	-0.312	0.236
mqtls	Muscle	SMAD2	-17.622	-50.148	14.905
mqtls	Muscle	CBX1	-0.112	-0.508	0.284
mqtls	Muscle	IRF4	0.774	0.294	1.253
mqtls	Muscle	RELB	-0.366	-0.66	-0.073
mqtls	Muscle	BRCA1	-0.353	-1.379	0.672
mqtls	Muscle	MTA1	-0.121	-0.617	0.375
mqtls	Muscle	MITF	-0.531	-1.025	-0.036
mqtls	Muscle	MCM7	0.453	-0.885	1.792
mqtls	Muscle	THRA	-3.195	-9.117	2.728
mqtls	Muscle	STAT2	-0.351	-1.886	1.184
mqtls	Muscle	ZNF8	2.286	-15.735	20.307
mqtls	Muscle	MCM3	0.865	-2.504	4.234
mqtls	Muscle	MEIS2	0.252	-0.089	0.592
mqtls	Muscle	GATA2	0.284	-0.057	0.626
mqtls	Muscle	ELK1	0.215	-0.131	0.561
mqtls	Muscle	HNRNPK	-0.168	-0.499	0.163
mqtls	Muscle	PHB2	-2.26	-4.409	-0.111
mqtls	Muscle	KAT2A	-9.162	-43.858	25.533
mqtls	Muscle	ZNF217	-0.63	-0.91	-0.35
mqtls	Muscle	RBBP5	-0.929	-1.212	-0.646
mqtls	Muscle	ZNF143	0.589	0.367	0.811
mqtls	Muscle	E2F7	-1.743	-3.565	0.079
mqtls	Muscle	ZBTB7A	-0.182	-0.447	0.083
mqtls	Muscle	ZNF207	0.07	-0.39	0.53
mqtls	Muscle	HNF4G	0.587	0.197	0.976
mqtls	Muscle	SMARCA5	0.337	0.029	0.645
mqtls	Muscle	NEUROD1	0.894	0.549	1.239
mqtls	Muscle	JUNB	-1.277	-2.01	-0.545
mqtls	Muscle	TAL1	-0.839	-1.374	-0.303
mqtls	Muscle	SIN3B	-0.21	-0.535	0.115
mqtls	Muscle	ASH2L	0.047	-0.182	0.277
mqtls	Muscle	NCOA2	-0.955	-2.612	0.702
mqtls	Muscle	ZBTB1	-1.508	-9.283	6.267
mqtls	Muscle	BRD4	-0.345	-0.688	-0.003
mqtls	Muscle	ZBTB5	-1.884	-3.415	-0.353
mqtls	Muscle	SIN3A	0.053	-0.135	0.241
mqtls	Muscle	PAX5	0.336	-0.073	0.745
mqtls	Muscle	CBFA2T2	-0.046	-0.557	0.464
mqtls	Muscle	ZKSCAN1	0.384	-0.066	0.835
mqtls	Muscle	PHF20	-0.458	-0.822	-0.095
mqtls	Muscle	ARID3A	-0.041	-0.352	0.27
mqtls	Muscle	SRSF4	0.779	0.092	1.466
mqtls	Muscle	EHMT2	0.113	-0.475	0.701
mqtls	Muscle	ZBTB2	0.255	-0.172	0.681
mqtls	Muscle	SAFB	0.125	-0.437	0.686
mqtls	Muscle	U2AF2	0.487	-0.217	1.191
mqtls	Muscle	GATAD2A	-0.69	-1.276	-0.105
mqtls	Muscle	BMI1	-0.506	-1.053	0.042
mqtls	Muscle	RUNX3	0.338	0.055	0.622
mqtls	Muscle	FOXP1	0.033	-1.485	1.552
mqtls	Muscle	EWSR1	-1.256	-13.342	10.83
mqtls	Muscle	NUFIP1	0.354	-0.464	1.172
mqtls	Muscle	RBM14	0.476	-0.14	1.091
mqtls	Muscle	HNRNPUL1	-0.813	-1.63	0.005
mqtls	Muscle	CBX3	0.18	-0.161	0.521
mqtls	Muscle	MAX	0.324	0.139	0.509
mqtls	Muscle	CBFA2T3	0.072	-0.646	0.79
mqtls	Muscle	TCF12	0.185	-0.041	0.41
mqtls	Muscle	CREM	-0.171	-0.407	0.064
mqtls	Muscle	IRF5	-0.243	-1.995	1.509
mqtls	Muscle	IRF3	-0.317	-0.989	0.355
mqtls	Muscle	E2F4	1.165	0.619	1.712
mqtls	Muscle	RBM22	-0.514	-0.898	-0.13
mqtls	Muscle	CBX8	-16.218	-33.82	1.385
mqtls	Muscle	ATM	1.628	-2.471	5.728
mqtls	Muscle	ELF1	0.047	-0.262	0.355
mqtls	Muscle	E2F8	0.18	-0.215	0.575
mqtls	Muscle	HSF1	-1.56	-3.264	0.143
mqtls	Muscle	FOSL2	0.318	-0.008	0.644
mqtls	Muscle	CBFB	-0.692	-1.074	-0.309
mqtls	Muscle	RBFOX2	-0.429	-0.595	-0.263
mqtls	Muscle	WHSC1	0.871	-0.499	2.241
mqtls	Muscle	MTA2	-0.081	-0.431	0.269
mqtls	Muscle	CHD4	-0.351	-0.802	0.101
mqtls	Muscle	KLF5	-0.322	-0.727	0.083
mqtls	Muscle	KLF16	0.244	-0.256	0.745
mqtls	Muscle	ZNF512B	-0.344	-1.361	0.673
mqtls	Muscle	SETDB1	0.364	-0.243	0.971
mqtls	Muscle	SKIL	-0.576	-0.86	-0.292
mqtls	Muscle	SREBF1	0.346	-0.061	0.754
mqtls	Muscle	NCOA1	-0.1	-0.471	0.27
mqtls	Muscle	GMEB1	-0.107	-0.424	0.21
mqtls	Muscle	CDC5L	-0.101	-0.979	0.776
mqtls	Muscle	NR2F6	0.407	0.09	0.724
mqtls	Muscle	EZH2	-0.053	-0.316	0.21
mqtls	Muscle	FOXK2	0.379	0.078	0.681
mqtls	Muscle	HDAC2	-0.04	-0.292	0.212
mqtls	Muscle	MYC	-0.18	-0.376	0.016
mqtls	Muscle	ZNF263	-0.119	-0.421	0.183
mqtls	Muscle	BHLHE40	0.244	0.018	0.469
mqtls	Muscle	RXRA	0.395	0.176	0.614
mqtls	Muscle	MYNN	0.083	-0.504	0.67
mqtls	Muscle	TBX21	-0.666	-1.089	-0.243
mqtls	Muscle	KAT2B	-15.479	-28.987	-1.971
mqtls	Muscle	ZNF574	0.85	0.307	1.393
mqtls	Muscle	SIX4	-8.88	-16.341	-1.419
mqtls	Muscle	TBX3	0.488	0.016	0.96
mqtls	Muscle	DNMT1	0.341	-0.388	1.07
mqtls	Muscle	HDAC1	-0.257	-0.445	-0.068
mqtls	Muscle	ZFX	-0.432	-0.65	-0.213
mqtls	Muscle	ARHGAP35	-6.578	-10.376	-2.78
mqtls	Muscle	FOXA2	-0.109	-0.489	0.27
mqtls	Muscle	TBL1XR1	0.419	0.123	0.716
mqtls	Muscle	POLR2G	-0.035	-0.279	0.209
mqtls	Muscle	ZNF444	0.568	0.238	0.897
mqtls	Muscle	IKZF1	0.283	0.108	0.458
mqtls	Muscle	L3MBTL2	0.359	0.16	0.557
mqtls	Muscle	ASH1L	-0.109	-0.903	0.685
mqtls	Muscle	PBX3	-0.73	-1.495	0.034
mqtls	Muscle	KDM5A	-0.933	-1.238	-0.628
mqtls	Muscle	RAD51	-0.147	-0.544	0.251
mqtls	Muscle	PHF8	-0.45	-0.648	-0.252
mqtls	Muscle	HNRNPH1	0.616	-0.246	1.479
mqtls	Muscle	WRNIP1	-1.975	-3.277	-0.672
mqtls	Muscle	PAX8	-4.424	-7.832	-1.017
mqtls	Muscle	MXI1	0.362	0.165	0.56
mqtls	Muscle	TCF7L2	-0.044	-0.397	0.309
mqtls	Muscle	RUNX1	0.321	-0.315	0.956
mqtls	Muscle	SIRT6	-2.95	-20.979	15.078
mqtls	Muscle	AGO2	-0.446	-0.751	-0.141
mqtls	Muscle	NCOA6	-0.475	-1.926	0.977
mqtls	Muscle	RBM25	-0.143	-0.725	0.439
mqtls	Muscle	RCOR1	0.427	0.158	0.696
mqtls	Muscle	BCOR	-0.194	-0.592	0.205
mqtls	Muscle	SMAD5	-0.025	-0.286	0.236
mqtls	Muscle	DACH1	0.577	0.077	1.078
mqtls	Muscle	RFX1	0.135	-0.269	0.54
mqtls	Muscle	HMBOX1	0.28	-0.17	0.73
mqtls	Muscle	LEF1	-0.753	-1.172	-0.333
mqtls	Muscle	SOX13	0.495	-0.217	1.208
mqtls	Muscle	NR2C2	1.131	0.312	1.949
mqtls	Muscle	STAT5A	-0.86	-1.375	-0.345
mqtls	Muscle	SMARCA4	0.405	0.185	0.625
mqtls	Muscle	HES1	-0.688	-1.395	0.019
mqtls	Muscle	USF1	0.484	0.131	0.837
mqtls	Muscle	ZNF318	-0.987	-1.867	-0.107
mqtls	Muscle	KDM4B	-0.347	-0.822	0.128
mqtls	Muscle	SMC3	0.36	0.144	0.576
mqtls	Muscle	GATA3	0.355	0.065	0.645
mqtls	Muscle	ELF4	0.201	-0.101	0.503
mqtls	Muscle	JUND	-0.169	-0.359	0.021
mqtls	Muscle	PRPF4	-0.217	-0.602	0.167
mqtls	Muscle	DEAF1	-0.442	-1.133	0.249
mqtls	Muscle	TFAP4	-0.306	-0.675	0.063
mqtls	Muscle	ZNF184	0.476	0.042	0.909
mqtls	Muscle	ETV4	0.245	-0.106	0.596
mqtls	Muscle	GATA4	-0.268	-0.672	0.135
mqtls	Muscle	TBP	0.413	0.216	0.61
mqtls	Muscle	NRF1	-0.322	-0.508	-0.136
mqtls	Muscle	ZNF830	-0.541	-1.354	0.272
mqtls	Muscle	FUS	-0.221	-0.632	0.191
mqtls	Muscle	CTCF	0.358	0.242	0.474
mqtls	Muscle	NFE2L2	0.321	-0.141	0.783
mqtls	Muscle	MIER1	-0.134	-0.912	0.645
mqtls	Muscle	HCFC1	-0.43	-0.741	-0.118
mqtls	Muscle	RFX5	0.516	0.221	0.811
mqtls	Muscle	BRD9	-0.657	-1.162	-0.153
mqtls	Muscle	ZSCAN29	-0.42	-0.795	-0.044
mqtls	Muscle	SMARCB1	-0.271	-2.346	1.804
mqtls	Muscle	BATF	-0.511	-1.412	0.39
mqtls	Muscle	XRCC3	-3.131	-9.074	2.813
mqtls	Muscle	TCF7	0.227	-0.232	0.686
mqtls	Muscle	ZFP91	-0.081	-0.606	0.443
mqtls	Muscle	SMARCC2	0.116	-0.677	0.909
mqtls	Muscle	COPS2	-3.271	-9.425	2.882
mqtls	Muscle	SKI	-0.422	-0.721	-0.124
mqtls	Muscle	YY1	0.293	0.132	0.454
mqtls	Muscle	ATF2	-0.349	-0.655	-0.043
mqtls	Muscle	FOXA1	0.365	0.116	0.615
mqtls	Muscle	FIP1L1	-0.395	-0.726	-0.064
mqtls	Muscle	SP1	0.047	-0.155	0.249
mqtls	Muscle	ZBED1	-0.252	-0.72	0.217
mqtls	Muscle	SUPT20H	-20.898	-62.111	20.316
mqtls	Muscle	ESR1	0.62	0.169	1.07
mqtls	Muscle	CHAMP1	0.298	-0.229	0.826
mqtls	Muscle	HNRNPL	0.197	-0.081	0.475
mqtls	Muscle	SUZ12	-0.123	-0.415	0.17
mqtls	Muscle	ARID2	-0.136	-1.01	0.738
mqtls	Muscle	BCL3	-0.275	-0.718	0.167
mqtls	Muscle	ZNF592	0.252	-0.022	0.526
mqtls	Muscle	SMAD1	-0.315	-0.767	0.136
mqtls	Muscle	SRF	0.162	-0.272	0.596
mqtls	Muscle	SRSF9	-16.392	-154.696	121.912
mqtls	Muscle	PLRG1	-12.285	-70.481	45.911
mqtls	Muscle	MAFF	0.363	-0.116	0.843
mqtls	Muscle	HNF4A	0.486	0.245	0.727
mqtls	Muscle	CBX5	-0.035	-0.585	0.515
mqtls	Muscle	GATA1	-0.779	-1.146	-0.413
mqtls	Muscle	FOSL1	-0.072	-1.19	1.046
mqtls	Muscle	IRF1	-0.275	-0.578	0.028
mqtls	Muscle	SNRNP70	0.154	-1.324	1.632
mqtls	Muscle	BACH1	-0.129	-0.503	0.245
mqtls	Muscle	PYGO2	-1.967	-3.516	-0.418
mqtls	Muscle	CHD1	-0.548	-0.891	-0.206
mqtls	Muscle	NR0B1	-20.095	-99.974	59.785
mqtls	Muscle	ETS1	-0.53	-0.826	-0.233
mqtls	Muscle	E2F6	0.312	0.004	0.621
mqtls	Muscle	TRIM22	0.25	-0.019	0.519
mqtls	Muscle	PKNOX1	0.103	-0.15	0.356
mqtls	Muscle	CTBP1	0.236	0.019	0.452
mqtls	Muscle	BCL11A	0.313	-0.369	0.995
mqtls	Muscle	CREB3L1	-0.413	-0.73	-0.096
mqtls	Muscle	RLF	-0.152	-0.692	0.388
mqtls	Muscle	POU2F2	0.43	-0.02	0.879
mqtls	Muscle	HNRNPLL	-0.233	-0.47	0.004
mqtls	Muscle	MEF2B	-0.725	-1.09	-0.36
mqtls	Muscle	PCBP1	0.267	-0.025	0.558
mqtls	Muscle	FOXM1	0.076	-0.579	0.73
mqtls	Muscle	ARID1B	0.466	0.144	0.788
mqtls	Muscle	ZMIZ1	1.15	0.05	2.249
mqtls	Muscle	ATF7	0.168	-0.048	0.385
mqtls	Ovary	RBM34	0.757	-0.296	1.811
mqtls	Ovary	MGA	0.123	-0.072	0.318
mqtls	Ovary	GABPB1	-0.323	-0.511	-0.135
mqtls	Ovary	PML	-0.217	-0.447	0.014
mqtls	Ovary	MYBL2	0.037	-0.48	0.553
mqtls	Ovary	NFIB	0.105	-0.263	0.473
mqtls	Ovary	NCOA4	0.373	-0.282	1.028
mqtls	Ovary	EP400	-0.055	-0.259	0.149
mqtls	Ovary	ZNF316	0.413	0.206	0.62
mqtls	Ovary	MBD2	0.337	0.114	0.56
mqtls	Ovary	E2F1	-0.064	-0.302	0.173
mqtls	Ovary	SAP30	-0.557	-0.771	-0.344
mqtls	Ovary	RNF2	-0.25	-0.379	-0.12
mqtls	Ovary	TRIM28	0.038	-0.201	0.277
mqtls	Ovary	EP300	0.337	0.232	0.442
mqtls	Ovary	KDM4A	-0.18	-0.318	-0.043
mqtls	Ovary	XRCC5	-0.167	-0.347	0.013
mqtls	Ovary	KDM5B	-0.063	-0.275	0.15
mqtls	Ovary	MEF2A	0.076	-0.359	0.511
mqtls	Ovary	ZBTB40	-0.19	-0.38	0
mqtls	Ovary	TAF1	-0.326	-0.446	-0.206
mqtls	Ovary	THAP1	-0.378	-0.897	0.14
mqtls	Ovary	ZBTB8A	-7.419	-19.66	4.822
mqtls	Ovary	JUN	0.489	0.249	0.729
mqtls	Ovary	USF2	0.33	0.092	0.568
mqtls	Ovary	NR3C1	0.079	-0.159	0.317
mqtls	Ovary	NFIC	0.039	-0.179	0.257
mqtls	Ovary	ATF4	0.067	-0.372	0.505
mqtls	Ovary	POLR2A	0.101	0.026	0.177
mqtls	Ovary	NFE2	0.129	-0.242	0.499
mqtls	Ovary	NFXL1	-0.313	-0.897	0.27
mqtls	Ovary	SAFB2	5.918	-155.792	167.629
mqtls	Ovary	TAF9B	-0.621	-0.92	-0.323
mqtls	Ovary	ZNF24	-0.358	-0.536	-0.18
mqtls	Ovary	MYB	-1.288	-2.608	0.032
mqtls	Ovary	NFRKB	-0.09	-0.329	0.149
mqtls	Ovary	CC2D1A	0.243	-0.01	0.495
mqtls	Ovary	ZZZ3	-0.633	-1.418	0.152
mqtls	Ovary	TAF7	-0.112	-0.403	0.179
mqtls	Ovary	ZEB2	0.152	-0.066	0.371
mqtls	Ovary	ZBTB33	-0.156	-0.309	-0.003
mqtls	Ovary	RAD21	0.539	0.432	0.645
mqtls	Ovary	SOX6	-0.068	-0.332	0.197
mqtls	Ovary	HDAC6	-1.04	-1.49	-0.589
mqtls	Ovary	ETV6	-0.355	-0.638	-0.073
mqtls	Ovary	ZNF384	-0.033	-0.284	0.217
mqtls	Ovary	PCBP2	-1.152	-2.025	-0.279
mqtls	Ovary	IRF2	0.132	-0.353	0.618
mqtls	Ovary	ZMYM3	-0.054	-0.37	0.262
mqtls	Ovary	MNT	-0.204	-0.322	-0.085
mqtls	Ovary	REST	-0.012	-0.113	0.09
mqtls	Ovary	MCM2	0.25	-0.828	1.327
mqtls	Ovary	SRSF7	-12.37	-22.952	-1.788
mqtls	Ovary	ZNF687	0.187	0.016	0.357
mqtls	Ovary	ZBTB11	-0.161	-0.521	0.198
mqtls	Ovary	ZEB1	-1.111	-1.584	-0.639
mqtls	Ovary	NBN	0.001	-0.126	0.127
mqtls	Ovary	ZNF639	-0.33	-0.547	-0.113
mqtls	Ovary	PTBP1	-0.291	-0.662	0.079
mqtls	Ovary	SREBF2	-1.243	-1.783	-0.703
mqtls	Ovary	MTA3	-0.2	-0.358	-0.041
mqtls	Ovary	EED	-0.112	-0.347	0.122
mqtls	Ovary	SMARCE1	0.056	-0.189	0.301
mqtls	Ovary	NFATC1	-0.078	-0.578	0.421
mqtls	Ovary	CREBBP	-8.61	-29.388	12.168
mqtls	Ovary	AFF1	-0.268	-0.501	-0.035
mqtls	Ovary	CEBPB	0.43	0.227	0.633
mqtls	Ovary	SIX5	-0.671	-0.996	-0.346
mqtls	Ovary	NR2C1	-0.11	-0.415	0.196
mqtls	Ovary	CREB1	0.092	-0.079	0.263
mqtls	Ovary	LCORL	0.41	-0.075	0.894
mqtls	Ovary	ESRRA	-0.021	-0.201	0.158
mqtls	Ovary	NR2F1	-0.055	-0.309	0.199
mqtls	Ovary	SPI1	0.146	-0.094	0.386
mqtls	Ovary	NR2F2	0.494	0.337	0.651
mqtls	Ovary	ATF3	-0.163	-0.328	0.001
mqtls	Ovary	EGR1	0.041	-0.118	0.2
mqtls	Ovary	ZNF507	0.421	-0.236	1.078
mqtls	Ovary	PHF21A	-0.133	-0.573	0.307
mqtls	Ovary	MEF2C	-0.939	-1.539	-0.34
mqtls	Ovary	E4F1	-0.236	-0.435	-0.038
mqtls	Ovary	U2AF1	-0.586	-0.881	-0.291
mqtls	Ovary	ZHX2	0.018	-0.238	0.274
mqtls	Ovary	ZNF282	-0.477	-0.793	-0.16
mqtls	Ovary	DPF2	-0.066	-0.207	0.075
mqtls	Ovary	NFYA	0.476	-0.08	1.032
mqtls	Ovary	STAT3	0.392	0.185	0.6
mqtls	Ovary	GATAD2B	-0.005	-0.127	0.117
mqtls	Ovary	AGO1	-0.474	-0.687	-0.262
mqtls	Ovary	EBF1	0.335	0.046	0.624
mqtls	Ovary	KDM1A	0.171	0.037	0.305
mqtls	Ovary	ZNF407	-0.175	-0.669	0.319
mqtls	Ovary	RB1	-0.173	-0.372	0.027
mqtls	Ovary	HDAC3	0.316	-0.083	0.716
mqtls	Ovary	NANOG	0.45	-0.014	0.913
mqtls	Ovary	IKZF2	-0.063	-0.248	0.122
mqtls	Ovary	NFYB	0.055	-0.649	0.758
mqtls	Ovary	PRDM10	0.056	-0.256	0.368
mqtls	Ovary	NCOR1	0.05	-0.147	0.247
mqtls	Ovary	MLLT1	-0.088	-0.245	0.069
mqtls	Ovary	RBM39	-0.25	-0.397	-0.102
mqtls	Ovary	ZHX1	-0.373	-0.793	0.048
mqtls	Ovary	TRIM24	0.225	-0.02	0.471
mqtls	Ovary	MCM5	0.094	-3.231	3.42
mqtls	Ovary	STAT1	0.075	-0.334	0.484
mqtls	Ovary	CBX2	-0.492	-1.112	0.128
mqtls	Ovary	HNF1A	-0.294	-0.737	0.15
mqtls	Ovary	ARNT	-0.087	-0.284	0.11
mqtls	Ovary	SMAD2	0.57	-2.134	3.273
mqtls	Ovary	CBX1	-0.069	-0.355	0.217
mqtls	Ovary	IRF4	0.622	0.291	0.953
mqtls	Ovary	RELB	-0.158	-0.348	0.032
mqtls	Ovary	BRCA1	-0.557	-1.161	0.047
mqtls	Ovary	MTA1	-0.025	-0.261	0.21
mqtls	Ovary	MITF	-0.091	-0.408	0.227
mqtls	Ovary	MCM7	-0.194	-1.381	0.992
mqtls	Ovary	THRA	1.115	0.167	2.063
mqtls	Ovary	STAT2	-0.607	-1.394	0.179
mqtls	Ovary	ZNF8	-18.36	-141.714	104.993
mqtls	Ovary	MCM3	2.146	1.11	3.182
mqtls	Ovary	MEIS2	0.329	0.118	0.54
mqtls	Ovary	GATA2	0.195	-0.017	0.407
mqtls	Ovary	ELK1	-0.462	-0.741	-0.183
mqtls	Ovary	HNRNPK	-0.331	-0.558	-0.104
mqtls	Ovary	PHB2	0.215	-0.336	0.766
mqtls	Ovary	KAT2A	-5.858	-21.287	9.572
mqtls	Ovary	ZNF217	-0.075	-0.27	0.12
mqtls	Ovary	RBBP5	-0.502	-0.679	-0.325
mqtls	Ovary	ZNF143	0.46	0.309	0.61
mqtls	Ovary	E2F7	-1.692	-2.711	-0.673
mqtls	Ovary	ZBTB7A	-0.097	-0.282	0.088
mqtls	Ovary	ZNF207	-0.129	-0.372	0.114
mqtls	Ovary	HNF4G	0.35	0.084	0.615
mqtls	Ovary	SMARCA5	-0.009	-0.18	0.163
mqtls	Ovary	NEUROD1	0.285	0.019	0.551
mqtls	Ovary	JUNB	0.08	-0.303	0.464
mqtls	Ovary	TAL1	-0.27	-0.553	0.014
mqtls	Ovary	SIN3B	-0.233	-0.496	0.029
mqtls	Ovary	ASH2L	-0.164	-0.282	-0.046
mqtls	Ovary	NCOA2	-0.606	-1.514	0.303
mqtls	Ovary	ZBTB1	-12.761	-32.119	6.597
mqtls	Ovary	BRD4	-0.779	-1.04	-0.518
mqtls	Ovary	ZBTB5	-0.265	-0.84	0.31
mqtls	Ovary	SIN3A	-0.164	-0.272	-0.057
mqtls	Ovary	PAX5	0.155	-0.133	0.444
mqtls	Ovary	CBFA2T2	0.697	0.411	0.982
mqtls	Ovary	ZKSCAN1	-0.341	-0.696	0.014
mqtls	Ovary	PHF20	-0.402	-0.651	-0.153
mqtls	Ovary	ARID3A	0.113	-0.101	0.328
mqtls	Ovary	SRSF4	-0.233	-0.997	0.531
mqtls	Ovary	EHMT2	0.278	0.017	0.539
mqtls	Ovary	ZBTB2	0.134	-0.142	0.41
mqtls	Ovary	SAFB	0.04	-0.301	0.381
mqtls	Ovary	U2AF2	0.227	-0.294	0.747
mqtls	Ovary	GATAD2A	-0.066	-0.601	0.47
mqtls	Ovary	BMI1	-0.169	-0.523	0.184
mqtls	Ovary	RUNX3	0.114	-0.088	0.316
mqtls	Ovary	FOXP1	-0.086	-1.203	1.031
mqtls	Ovary	EWSR1	-1.022	-6.165	4.121
mqtls	Ovary	NUFIP1	-0.067	-0.675	0.541
mqtls	Ovary	RBM14	-0.56	-1.139	0.019
mqtls	Ovary	HNRNPUL1	-0.569	-1.151	0.014
mqtls	Ovary	CBX3	-0.373	-0.62	-0.127
mqtls	Ovary	MAX	0.158	0.039	0.278
mqtls	Ovary	CBFA2T3	0.59	0.355	0.825
mqtls	Ovary	TCF12	0.073	-0.076	0.221
mqtls	Ovary	CREM	0.084	-0.074	0.243
mqtls	Ovary	IRF5	0.562	-0.338	1.463
mqtls	Ovary	IRF3	0.349	-0.048	0.746
mqtls	Ovary	E2F4	0.197	-0.268	0.662
mqtls	Ovary	RBM22	-0.149	-0.4	0.102
mqtls	Ovary	CBX8	-1.71	-4.475	1.055
mqtls	Ovary	ATM	-26.069	-62.908	10.771
mqtls	Ovary	ELF1	0.07	-0.093	0.232
mqtls	Ovary	E2F8	-0.147	-0.455	0.162
mqtls	Ovary	HSF1	-1.298	-2.332	-0.264
mqtls	Ovary	FOSL2	0.251	0.027	0.475
mqtls	Ovary	CBFB	-0.773	-1.051	-0.495
mqtls	Ovary	RBFOX2	-0.486	-0.595	-0.377
mqtls	Ovary	WHSC1	0.434	-0.653	1.521
mqtls	Ovary	MTA2	0.122	-0.061	0.306
mqtls	Ovary	CHD4	-0.007	-0.229	0.215
mqtls	Ovary	KLF5	-0.438	-0.719	-0.156
mqtls	Ovary	KLF16	0.378	0.041	0.716
mqtls	Ovary	ZNF512B	-0.286	-0.959	0.387
mqtls	Ovary	SETDB1	-0.289	-0.758	0.179
mqtls	Ovary	SKIL	-0.123	-0.307	0.061
mqtls	Ovary	SREBF1	-0.378	-0.728	-0.028
mqtls	Ovary	NCOA1	-0.339	-0.556	-0.123
mqtls	Ovary	GMEB1	-0.166	-0.362	0.03
mqtls	Ovary	CDC5L	-0.107	-0.701	0.486
mqtls	Ovary	NR2F6	0.257	0.059	0.455
mqtls	Ovary	EZH2	-0.29	-0.426	-0.154
mqtls	Ovary	FOXK2	-0.048	-0.399	0.302
mqtls	Ovary	HDAC2	-0.169	-0.288	-0.051
mqtls	Ovary	MYC	0.029	-0.159	0.217
mqtls	Ovary	ZNF263	-0.39	-0.581	-0.2
mqtls	Ovary	BHLHE40	0.215	0.07	0.36
mqtls	Ovary	RXRA	0.465	0.325	0.606
mqtls	Ovary	MYNN	0.246	-0.059	0.552
mqtls	Ovary	TBX21	-0.232	-0.486	0.023
mqtls	Ovary	KAT2B	-2.717	-7.412	1.978
mqtls	Ovary	ZNF574	-0.615	-1.232	0.003
mqtls	Ovary	SIX4	-1.539	-2.999	-0.079
mqtls	Ovary	TBX3	0.137	-0.205	0.479
mqtls	Ovary	DNMT1	0.003	-0.489	0.495
mqtls	Ovary	HDAC1	-0.106	-0.232	0.02
mqtls	Ovary	ZFX	-0.282	-0.433	-0.131
mqtls	Ovary	ARHGAP35	-0.167	-1.002	0.669
mqtls	Ovary	FOXA2	0.365	0.163	0.567
mqtls	Ovary	TBL1XR1	-0.129	-0.351	0.092
mqtls	Ovary	POLR2G	-0.194	-0.308	-0.079
mqtls	Ovary	ZNF444	0.06	-0.282	0.402
mqtls	Ovary	IKZF1	0.229	0.116	0.342
mqtls	Ovary	L3MBTL2	-0.024	-0.302	0.254
mqtls	Ovary	ASH1L	0.178	-0.186	0.542
mqtls	Ovary	PBX3	0.244	-0.171	0.658
mqtls	Ovary	KDM5A	-0.665	-0.881	-0.449
mqtls	Ovary	RAD51	0.165	-0.077	0.407
mqtls	Ovary	PHF8	-0.432	-0.567	-0.297
mqtls	Ovary	HNRNPH1	-1.568	-2.751	-0.386
mqtls	Ovary	WRNIP1	-0.787	-1.34	-0.233
mqtls	Ovary	PAX8	-0.872	-1.699	-0.045
mqtls	Ovary	MXI1	-0.021	-0.438	0.395
mqtls	Ovary	TCF7L2	-0.008	-0.204	0.188
mqtls	Ovary	RUNX1	-0.236	-0.724	0.251
mqtls	Ovary	SIRT6	1.116	-0.624	2.855
mqtls	Ovary	AGO2	-0.306	-0.5	-0.113
mqtls	Ovary	NCOA6	0.058	-0.549	0.665
mqtls	Ovary	RBM25	0.053	-0.683	0.79
mqtls	Ovary	RCOR1	0.55	0.37	0.73
mqtls	Ovary	BCOR	-0.159	-0.403	0.085
mqtls	Ovary	SMAD5	-0.34	-0.547	-0.132
mqtls	Ovary	DACH1	0.203	-0.14	0.546
mqtls	Ovary	RFX1	-0.115	-0.356	0.127
mqtls	Ovary	HMBOX1	0.09	-0.23	0.41
mqtls	Ovary	LEF1	0.138	-0.111	0.387
mqtls	Ovary	SOX13	0.282	-0.218	0.782
mqtls	Ovary	NR2C2	-0.068	-1.036	0.9
mqtls	Ovary	STAT5A	-0.472	-0.806	-0.138
mqtls	Ovary	SMARCA4	0.204	0.057	0.351
mqtls	Ovary	HES1	-0.393	-0.796	0.011
mqtls	Ovary	USF1	0.461	0.239	0.684
mqtls	Ovary	ZNF318	-0.105	-0.679	0.469
mqtls	Ovary	KDM4B	-0.216	-0.534	0.102
mqtls	Ovary	SMC3	0.177	0.032	0.322
mqtls	Ovary	GATA3	0.308	0.122	0.493
mqtls	Ovary	ELF4	0.057	-0.206	0.319
mqtls	Ovary	JUND	0.106	-0.017	0.23
mqtls	Ovary	PRPF4	-0.745	-1.05	-0.441
mqtls	Ovary	DEAF1	0.087	-0.599	0.773
mqtls	Ovary	TFAP4	-0.058	-0.388	0.272
mqtls	Ovary	ZNF184	0.106	-0.229	0.441
mqtls	Ovary	ETV4	-0.176	-0.438	0.086
mqtls	Ovary	GATA4	-0.286	-0.575	0.004
mqtls	Ovary	TBP	0.096	-0.04	0.231
mqtls	Ovary	NRF1	-0.252	-0.379	-0.125
mqtls	Ovary	ZNF830	-0.54	-1.15	0.071
mqtls	Ovary	FUS	-0.638	-0.961	-0.315
mqtls	Ovary	CTCF	0.189	0.114	0.263
mqtls	Ovary	NFE2L2	0.029	-0.282	0.339
mqtls	Ovary	MIER1	0.052	-0.274	0.378
mqtls	Ovary	HCFC1	-0.527	-0.755	-0.299
mqtls	Ovary	RFX5	-0.06	-0.338	0.218
mqtls	Ovary	BRD9	-0.257	-0.545	0.032
mqtls	Ovary	ZSCAN29	-0.718	-0.998	-0.439
mqtls	Ovary	SMARCB1	-0.4	-1.269	0.47
mqtls	Ovary	BATF	-0.126	-0.781	0.529
mqtls	Ovary	XRCC3	-0.3	-2.805	2.205
mqtls	Ovary	TCF7	0.108	-0.234	0.45
mqtls	Ovary	ZFP91	0.184	-0.156	0.524
mqtls	Ovary	SMARCC2	0.348	0.013	0.683
mqtls	Ovary	COPS2	-14.878	-26.945	-2.81
mqtls	Ovary	SKI	-0.472	-0.678	-0.265
mqtls	Ovary	YY1	0.096	-0.012	0.205
mqtls	Ovary	ATF2	-0.239	-0.441	-0.037
mqtls	Ovary	FOXA1	0.363	0.201	0.526
mqtls	Ovary	FIP1L1	-0.61	-0.849	-0.371
mqtls	Ovary	SP1	0.279	0.17	0.387
mqtls	Ovary	ZBED1	0.04	-0.219	0.299
mqtls	Ovary	SUPT20H	-11.221	-32.708	10.266
mqtls	Ovary	ESR1	0.5	0.204	0.797
mqtls	Ovary	CHAMP1	0.315	-0.001	0.631
mqtls	Ovary	HNRNPL	-0.313	-0.505	-0.121
mqtls	Ovary	SUZ12	-0.365	-0.546	-0.184
mqtls	Ovary	ARID2	-0.343	-0.811	0.125
mqtls	Ovary	BCL3	-0.323	-0.591	-0.055
mqtls	Ovary	ZNF592	-0.01	-0.177	0.156
mqtls	Ovary	SMAD1	-0.53	-0.812	-0.247
mqtls	Ovary	SRF	-0.021	-0.279	0.236
mqtls	Ovary	SRSF9	-20.498	-281.342	240.345
mqtls	Ovary	PLRG1	2.33	-3.834	8.494
mqtls	Ovary	MAFF	0.477	0.198	0.757
mqtls	Ovary	HNF4A	0.398	0.235	0.561
mqtls	Ovary	CBX5	0.172	-0.256	0.601
mqtls	Ovary	GATA1	-0.307	-0.512	-0.103
mqtls	Ovary	FOSL1	0.588	0.073	1.103
mqtls	Ovary	IRF1	-0.251	-0.445	-0.057
mqtls	Ovary	SNRNP70	-0.706	-1.971	0.56
mqtls	Ovary	BACH1	-0.513	-0.751	-0.274
mqtls	Ovary	PYGO2	-0.575	-1.334	0.185
mqtls	Ovary	CHD1	-0.7	-0.93	-0.471
mqtls	Ovary	NR0B1	-23.18	-84.709	38.349
mqtls	Ovary	ETS1	-0.255	-0.457	-0.052
mqtls	Ovary	E2F6	0.087	-0.136	0.311
mqtls	Ovary	TRIM22	0.163	-0.015	0.34
mqtls	Ovary	PKNOX1	0.156	0.007	0.306
mqtls	Ovary	CTBP1	0.181	0.036	0.326
mqtls	Ovary	BCL11A	0.278	-0.168	0.724
mqtls	Ovary	CREB3L1	-0.106	-0.319	0.106
mqtls	Ovary	RLF	-0.208	-0.575	0.16
mqtls	Ovary	POU2F2	-0.496	-0.844	-0.148
mqtls	Ovary	HNRNPLL	-0.172	-0.328	-0.017
mqtls	Ovary	MEF2B	0.128	-0.081	0.337
mqtls	Ovary	PCBP1	-0.236	-0.448	-0.024
mqtls	Ovary	FOXM1	0.15	-0.153	0.452
mqtls	Ovary	ARID1B	0.184	-0.038	0.405
mqtls	Ovary	ZMIZ1	0.269	-0.957	1.494
mqtls	Ovary	ATF7	0.051	-0.102	0.204
mqtls	Prostate	C11orf30	-0.073	-0.364	0.218
mqtls	Prostate	ZNF280A	-0.638	-1.957	0.681
mqtls	Prostate	FOS	0.549	0.379	0.718
mqtls	Prostate	TAF15	-0.38	-0.603	-0.156
mqtls	Prostate	CUX1	-0.068	-3.817	3.68
mqtls	Prostate	NCOA3	0.788	-0.002	1.578
mqtls	Prostate	KAT8	0.028	-0.863	0.919
mqtls	Prostate	NFATC3	-0.037	-0.256	0.183
mqtls	Prostate	GABPA	-0.345	-0.523	-0.166
mqtls	Prostate	CCAR2	-0.107	-2.513	2.3
mqtls	Prostate	UBTF	0.275	0.055	0.495
mqtls	Prostate	CLOCK	-0.466	-0.759	-0.172
mqtls	Prostate	TRIP13	1.096	0.364	1.828
mqtls	Prostate	ZNF579	-0.464	-0.822	-0.105
mqtls	Prostate	TEAD4	0.407	0.138	0.677
mqtls	Prostate	RBM15	-0.565	-2.837	1.708
mqtls	Prostate	ZBTB7B	0.182	-0.302	0.667
mqtls	Prostate	MAFK	0.137	-0.097	0.371
mqtls	Prostate	CHD7	0.091	-0.547	0.729
mqtls	Prostate	ZNF274	0.184	-0.649	1.017
mqtls	Prostate	RBM34	0.743	-0.318	1.804
mqtls	Prostate	MGA	0.282	0.077	0.487
mqtls	Prostate	GABPB1	-0.176	-0.387	0.034
mqtls	Prostate	PML	-0.523	-0.783	-0.263
mqtls	Prostate	MYBL2	0.293	-0.407	0.992
mqtls	Prostate	NFIB	0.217	-0.157	0.591
mqtls	Prostate	NCOA4	-0.545	-1.375	0.286
mqtls	Prostate	EP400	-0.38	-0.572	-0.189
mqtls	Prostate	ZNF316	0.55	0.301	0.799
mqtls	Prostate	MBD2	0.315	0.07	0.56
mqtls	Prostate	E2F1	0.095	-0.16	0.35
mqtls	Prostate	SAP30	-0.704	-0.947	-0.461
mqtls	Prostate	RNF2	-0.024	-0.157	0.11
mqtls	Prostate	TRIM28	-0.036	-0.234	0.161
mqtls	Prostate	EP300	0.401	0.279	0.522
mqtls	Prostate	KDM4A	-0.349	-0.507	-0.19
mqtls	Prostate	XRCC5	-0.244	-0.445	-0.043
mqtls	Prostate	KDM5B	0.453	0.251	0.656
mqtls	Prostate	MEF2A	0.179	-0.202	0.56
mqtls	Prostate	ZBTB40	-0.191	-0.402	0.021
mqtls	Prostate	TAF1	-0.173	-0.311	-0.034
mqtls	Prostate	THAP1	-0.615	-1.244	0.014
mqtls	Prostate	ZBTB8A	-15.334	-44.648	13.98
mqtls	Prostate	JUN	0.519	0.251	0.788
mqtls	Prostate	USF2	0.593	0.333	0.853
mqtls	Prostate	NR3C1	-0.119	-0.392	0.154
mqtls	Prostate	NFIC	0.063	-0.161	0.288
mqtls	Prostate	ATF4	-0.3	-0.706	0.106
mqtls	Prostate	POLR2A	0.071	-0.021	0.163
mqtls	Prostate	NFE2	0.132	-0.346	0.609
mqtls	Prostate	NFXL1	-0.235	-0.939	0.469
mqtls	Prostate	SAFB2	-0.682	-392.653	391.288
mqtls	Prostate	TAF9B	-0.263	-0.579	0.054
mqtls	Prostate	ZNF24	-0.044	-0.404	0.315
mqtls	Prostate	MYB	-0.361	-1.323	0.602
mqtls	Prostate	NFRKB	-0.211	-0.46	0.037
mqtls	Prostate	CC2D1A	0.37	0.091	0.65
mqtls	Prostate	ZZZ3	-0.497	-1.29	0.297
mqtls	Prostate	TAF7	-0.598	-0.908	-0.287
mqtls	Prostate	ZEB2	0.183	-0.061	0.427
mqtls	Prostate	ZBTB33	-0.205	-0.381	-0.028
mqtls	Prostate	RAD21	0.673	0.549	0.796
mqtls	Prostate	SOX6	-0.134	-0.391	0.123
mqtls	Prostate	HDAC6	-0.563	-0.979	-0.147
mqtls	Prostate	ETV6	0.1	-0.215	0.415
mqtls	Prostate	ZNF384	0.033	-0.237	0.303
mqtls	Prostate	PCBP2	-0.766	-1.579	0.047
mqtls	Prostate	IRF2	-0.059	-0.456	0.339
mqtls	Prostate	ZMYM3	-0.502	-0.958	-0.045
mqtls	Prostate	MNT	0.092	-0.047	0.23
mqtls	Prostate	REST	-0.185	-0.315	-0.056
mqtls	Prostate	MCM2	-10.668	-17.233	-4.103
mqtls	Prostate	SRSF7	-28.19	-51.591	-4.789
mqtls	Prostate	ZNF687	0.022	-0.154	0.198
mqtls	Prostate	ZBTB11	-0.268	-0.639	0.103
mqtls	Prostate	ZEB1	-1.419	-2.028	-0.81
mqtls	Prostate	NBN	-0.052	-0.27	0.165
mqtls	Prostate	ZNF639	-0.04	-0.264	0.185
mqtls	Prostate	PTBP1	-0.357	-0.796	0.082
mqtls	Prostate	SREBF2	-0.32	-0.818	0.178
mqtls	Prostate	MTA3	-0.325	-0.502	-0.148
mqtls	Prostate	EED	0.325	0.087	0.562
mqtls	Prostate	SMARCE1	-0.005	-0.173	0.163
mqtls	Prostate	NFATC1	0.215	-0.169	0.599
mqtls	Prostate	CREBBP	2.551	0.476	4.625
[truncated: 3,612 more rows]

## Sheet: TF Binding Sites - Across Tissu
QTL	ft	estimate	se	zval	pval	ci.lb	ci.ub	I2	QEp	padj	percent_top_QTL_variants
eQTLs	GABPA	0.799803	0.0390003	20.5076	1.84046e-93	0.723364	0.876242	79.7954	7.55818e-06	1.24783e-90	3.66997
eQTLs	MTA3	0.306948	0.016964	18.0941	3.54644e-73	0.273699	0.340196	0.00468845	0.113496	2.40448e-70	3.37002
eQTLs	POLR2G	0.560384	0.0318869	17.5741	3.88791e-69	0.497887	0.622881	87.502	1.35698e-11	2.63601e-66	7.61879
eQTLs	GATAD2B	0.403114	0.0239817	16.8093	2.08773e-63	0.356111	0.450117	50.0415	0.0364673	1.41548e-60	3.42873
eQTLs	TAF15	0.404587	0.0247921	16.3192	7.21134e-60	0.355995	0.453178	35.1622	0.171944	4.88929e-57	2.39681
eQTLs	MXI1	0.359587	0.0236579	15.1995	3.56533e-52	0.313218	0.405955	70.3581	0.00028017	2.41729e-49	4.52302
eQTLs	MAX	0.431202	0.0294699	14.6319	1.75668e-48	0.373442	0.488962	81.9925	1.34888e-09	1.19103e-45	5.95028
eQTLs	ETS1	0.354184	0.0243483	14.5466	6.13989e-48	0.306462	0.401906	47.5539	0.0619147	4.16284e-45	2.74812
eQTLs	PHF8	0.703446	0.0485474	14.4899	1.40382e-47	0.608295	0.798597	92.7301	8.13683e-21	9.51788e-45	4.38268
eQTLs	MYC	0.56694	0.0395367	14.3396	1.23777e-46	0.48945	0.644431	88.7634	1.00668e-11	8.39211e-44	5.39534
eQTLs	EGR1	0.459431	0.0327344	14.0351	9.50273e-45	0.395273	0.523589	74.1599	0.000480502	6.44285e-42	4.25243
eQTLs	AGO2	0.36768	0.0263708	13.9427	3.48631e-44	0.315994	0.419366	64.6602	0.00424391	2.36372e-41	3.81765
eQTLs	E4F1	0.285103	0.0208265	13.6894	1.17441e-42	0.244283	0.325922	12.2006	0.376009	7.96249e-40	2.34085
eQTLs	RBM39	0.582008	0.043776	13.2951	2.4703e-40	0.496209	0.667808	74.9691	0.00448162	1.67487e-37	3.78554
eQTLs	KDM4A	0.332466	0.0255153	13.0301	8.25073e-39	0.282457	0.382475	67.6476	0.00321192	5.59399e-36	3.29848
eQTLs	ZBTB7A	0.250854	0.0196688	12.7539	2.96609e-37	0.212303	0.289404	0	0.734629	2.01101e-34	2.77564
eQTLs	SIN3A	0.772154	0.0611437	12.6285	1.46998e-36	0.652315	0.891994	95.9968	5.59075e-32	9.96646e-34	6.45753
eQTLs	RBFOX2	0.462071	0.0371347	12.4431	1.52503e-35	0.389288	0.534853	91.2456	4.95654e-10	1.03397e-32	7.57109
eQTLs	CTCF	0.293373	0.023838	12.307	8.30749e-35	0.246652	0.340095	79.177	0.000334352	5.63248e-32	11.9593
eQTLs	AGO1	0.298938	0.0243003	12.3018	8.85445e-35	0.251311	0.346566	37.2514	0.15764	6.00332e-32	2.79582
eQTLs	MEIS2	0.306925	0.0249986	12.2777	1.19373e-34	0.257929	0.355921	0	0.517053	8.09346e-32	1.93909
eQTLs	UBTF	0.310001	0.0252704	12.2674	1.3559e-34	0.260472	0.35953	26.4453	0.200668	9.193e-32	1.92625
eQTLs	YY1	0.415389	0.0340524	12.1985	3.16433e-34	0.348648	0.48213	85.881	4.75639e-11	2.14541e-31	6.36856
eQTLs	ZFX	0.398418	0.0327174	12.1776	4.09227e-34	0.334294	0.462543	82.4567	5.3968e-08	2.77456e-31	3.98184
eQTLs	POLR2A	0.687082	0.057481	11.9532	6.24814e-33	0.574421	0.799743	95.754	1.54739e-14	4.23624e-30	15.2825
eQTLs	NRF1	0.473803	0.040815	11.6085	3.72978e-31	0.393807	0.553799	89.2914	4.24923e-10	2.52879e-28	4.55788
eQTLs	ZNF687	0.215323	0.0186895	11.5211	1.03281e-30	0.178693	0.251954	0.112309	0.528856	7.00245e-28	2.90222
eQTLs	KDM5B	0.202992	0.0177171	11.4574	2.15901e-30	0.168267	0.237717	16.6823	0.310804	1.46381e-27	2.39864
eQTLs	MNT	0.510462	0.045177	11.2992	1.32473e-29	0.421917	0.599007	88.7296	6.96265e-09	8.98169e-27	5.58063
eQTLs	HNRNPL	0.319728	0.0289819	11.032	2.67841e-28	0.262925	0.376532	53.1729	0.0200388	1.81596e-25	2.50229
eQTLs	SP1	0.487568	0.0448387	10.8738	1.53651e-27	0.399686	0.57545	90.9387	1.37678e-19	1.04175e-24	6.10622
eQTLs	PHF20	0.349088	0.0325711	10.7177	8.40349e-27	0.28525	0.412927	57.7514	0.0106288	5.69757e-24	1.40525
eQTLs	ZBTB2	0.241233	0.0231677	10.4125	2.1751e-25	0.195825	0.286641	0	0.948646	1.47472e-22	1.26582
eQTLs	ELF4	0.276819	0.0270244	10.2433	1.26812e-24	0.223853	0.329786	51.0828	0.0466222	8.59784e-22	1.71253
eQTLs	IRF1	0.627273	0.0616034	10.1824	2.37523e-24	0.506533	0.748014	90.1209	2.50909e-06	1.61041e-21	2.18859
eQTLs	BACH1	0.253432	0.0250967	10.0982	5.62555e-24	0.204243	0.30262	34.4702	0.179029	3.81412e-21	2.11888
eQTLs	HDAC2	0.305763	0.0305297	10.0152	1.30625e-23	0.245926	0.3656	80.9789	4.54848e-06	8.85636e-21	5.1064
eQTLs	ZNF592	0.209624	0.0209613	10.0005	1.51572e-23	0.168541	0.250708	5.18335	0.59894	1.02766e-20	2.55549
eQTLs	RB1	0.323354	0.0324991	9.94965	2.53073e-23	0.259657	0.387051	68.2231	0.00203548	1.71583e-20	2.69217
eQTLs	ASH2L	0.422656	0.0426364	9.91305	3.65332e-23	0.339091	0.506222	87.3087	6.18619e-07	2.47695e-20	5.19446
eQTLs	SMAD5	0.222391	0.0226893	9.80157	1.10843e-22	0.177921	0.266861	53.3115	0.0336838	7.51519e-20	2.71326
eQTLs	RAD21	0.217221	0.0222999	9.7409	2.01763e-22	0.173514	0.260928	44.8082	0.0654997	1.36795e-19	5.27334
eQTLs	E2F6	0.212328	0.0218226	9.7297	2.25261e-22	0.169556	0.255099	13.5175	0.277689	1.52727e-19	2.03632
eQTLs	RBBP5	0.242297	0.0251544	9.63237	5.83678e-22	0.192995	0.291598	39.2291	0.141166	3.95734e-19	2.43808
eQTLs	PKNOX1	0.226447	0.0238663	9.48815	2.35177e-21	0.17967	0.273224	42.204	0.091191	1.5945e-18	3.91029
eQTLs	TBP	0.426323	0.0454482	9.3804	6.57212e-21	0.337246	0.515399	90.86	2.29408e-15	4.4559e-18	4.20473
eQTLs	TAF1	0.496576	0.056198	8.83619	9.90403e-19	0.38643	0.606722	91.7313	2.37102e-10	6.71493e-16	5.13759
eQTLs	PBX3	0.324224	0.0386739	8.38353	5.13655e-17	0.248424	0.400023	0.00165384	0.481326	3.48258e-14	0.500826
eQTLs	KLF5	0.171804	0.0208871	8.22536	1.94601e-16	0.130866	0.212742	0	0.482738	1.31939e-13	1.2805
eQTLs	REST	0.37419	0.0456168	8.20289	2.34684e-16	0.284782	0.463597	88.785	3.60841e-06	1.59115e-13	5.77234
eQTLs	ZHX2	0.296406	0.0365681	8.10557	5.24977e-16	0.224734	0.368078	59.6026	0.0197388	3.55934e-13	1.43276
eQTLs	ELF1	0.38913	0.0481901	8.07489	6.75387e-16	0.294679	0.483581	91.2593	6.34784e-19	4.57913e-13	3.96349
eQTLs	RXRA	0.265995	0.0342511	7.76602	8.09891e-15	0.198864	0.333126	75.0071	2.14519e-05	5.49106e-12	3.67914
eQTLs	BHLHE40	0.292202	0.0378409	7.72187	1.14632e-14	0.218036	0.366369	84.9098	4.4381e-08	7.77202e-12	4.14419
eQTLs	GATA1	0.167671	0.0218671	7.66772	1.75087e-14	0.124812	0.21053	0	0.710166	1.18709e-11	1.91341
eQTLs	SMC3	0.143338	0.018852	7.60332	2.88634e-14	0.106388	0.180287	23.2566	0.243711	1.95694e-11	3.12878
eQTLs	GABPB1	0.22636	0.0300816	7.52485	5.27821e-14	0.167401	0.285318	73.896	0.000155812	3.57863e-11	2.89121
eQTLs	HCFC1	0.241131	0.0327008	7.37386	1.65757e-13	0.177038	0.305223	69.4495	0.00358227	1.12383e-10	2.09686
eQTLs	HNF4A	0.226967	0.0312392	7.26544	3.71817e-13	0.165739	0.288195	55.6711	0.0258229	2.52092e-10	3.08842
eQTLs	NR2F6	-0.182199	0.0250927	-7.26103	3.84162e-13	-0.231379	-0.133018	0	0.752858	2.60462e-10	1.87489
eQTLs	ESRRA	0.234981	0.0327032	7.18528	6.70708e-13	0.170884	0.299078	64.243	0.00795136	4.5474e-10	2.66465
eQTLs	ATF7	0.280682	0.0402756	6.96903	3.19137e-12	0.201743	0.359621	84.8309	1.00703e-06	2.16375e-09	4.6918
eQTLs	MBD2	0.119987	0.0175864	6.82273	8.93279e-12	0.0855184	0.154456	0.0690808	0.2142	6.05643e-09	1.80334
eQTLs	EP300	0.659679	0.096721	6.82043	9.0771e-12	0.470109	0.849248	98.378	4.51746e-98	6.15427e-09	7.11246
eQTLs	SAP30	0.139629	0.02054	6.7979	1.06157e-11	0.0993712	0.179887	27.9954	0.122981	7.19747e-09	1.97854
eQTLs	SIN3B	0.204072	0.030137	6.7715	1.27455e-11	0.145005	0.26314	38.0295	0.0757179	8.64148e-09	1.37865
eQTLs	HNRNPLL	0.380641	0.0584652	6.51056	7.4873e-11	0.266051	0.495231	92.4432	1.93722e-09	5.07639e-08	3.47276
eQTLs	ZBTB11	0.249178	0.0384841	6.47483	9.49205e-11	0.17375	0.324605	35.8238	0.121101	6.43561e-08	0.823702
eQTLs	ZNF143	0.340519	0.0528281	6.44579	1.15003e-10	0.236977	0.44406	87.8137	7.87228e-09	7.7972e-08	3.38562
eQTLs	CHD4	-0.242981	0.0379552	-6.4018	1.5356e-10	-0.317372	-0.168591	14.4761	0.40328	1.04114e-07	0.950284
eQTLs	CREM	0.152572	0.0240649	6.34004	2.29703e-10	0.105406	0.199739	62.6286	0.0107168	1.55738e-07	3.85709
eQTLs	CBX3	-0.140131	0.0222062	-6.31046	2.78213e-10	-0.183654	-0.0966078	0.000295897	0.349154	1.88628e-07	1.52633
eQTLs	FIP1L1	0.137399	0.0218751	6.28106	3.36274e-10	0.0945243	0.180273	12.0372	0.393495	2.27994e-07	1.68501
eQTLs	C11orf30	0.228848	0.0366349	6.24673	4.19125e-10	0.157045	0.300651	57.4511	0.0220602	2.84167e-07	1.91616
eQTLs	JUND	0.279367	0.0462032	6.04649	1.48037e-09	0.188811	0.369924	91.0402	8.71022e-15	1.00369e-06	5.31737
eQTLs	NFYB	0.190824	0.0316294	6.03313	1.60814e-09	0.128832	0.252816	0	0.761126	1.09032e-06	0.75399
eQTLs	ZMYM3	-0.326538	0.0543402	-6.00914	1.86507e-09	-0.433043	-0.220033	22.3718	0.350333	1.26452e-06	1.30618
eQTLs	BCL3	0.176085	0.0294313	5.9829	2.19204e-09	0.1184	0.233769	27.7878	0.212766	1.4862e-06	1.51532
eQTLs	DEAF1	-0.266638	0.044796	-5.95227	2.64451e-09	-0.354437	-0.178839	26.53	0.281697	1.79298e-06	0.402678
eQTLs	RUNX3	0.333208	0.0561596	5.93323	2.97035e-09	0.223137	0.443279	87.6985	1.10754e-12	2.01389e-06	2.3913
eQTLs	CBX1	0.279928	0.0478263	5.85302	4.82733e-09	0.186191	0.373666	57.291	0.0434476	3.27293e-06	1.37498
eQTLs	SMARCA4	0.107455	0.0185474	5.79351	6.89289e-09	0.0711025	0.143807	13.2568	0.313491	4.67338e-06	3.32049
eQTLs	ZFP91	0.170938	0.0299569	5.70613	1.15574e-08	0.112224	0.229653	0	0.823916	7.8359e-06	0.89158
eQTLs	CDC5L	-0.30899	0.0551241	-5.60536	2.07817e-08	-0.417032	-0.200949	0	0.83088	1.409e-05	0.29811
eQTLs	RFX1	0.191016	0.0341513	5.59323	2.22878e-08	0.124081	0.257951	57.1489	0.0152418	1.51111e-05	1.84462
eQTLs	USF2	0.16599	0.0297038	5.58817	2.29472e-08	0.107772	0.224208	0	0.497972	1.55582e-05	1.34838
eQTLs	KLF16	-0.25567	0.0465593	-5.49129	3.99019e-08	-0.346925	-0.164416	23.4856	0.295335	2.70535e-05	0.661347
eQTLs	ELK1	0.205612	0.0378382	5.43398	5.51098e-08	0.131451	0.279774	59.575	0.0179008	3.73644e-05	1.40066
eQTLs	TCF12	0.132309	0.024387	5.42541	5.78225e-08	0.0845117	0.180107	59.1392	0.00533403	3.92037e-05	3.95249
eQTLs	USF1	0.124361	0.0230528	5.3946	6.86775e-08	0.079178	0.169543	0.0304148	0.344153	4.65634e-05	1.49972
eQTLs	CTBP1	0.238796	0.0450711	5.29822	1.16938e-07	0.150459	0.327134	87.5411	1.22479e-06	7.9284e-05	4.07081
eQTLs	PHF21A	-0.220624	0.0419539	-5.25873	1.45057e-07	-0.302852	-0.138396	0.0245398	0.590591	9.83488e-05	0.545771
eQTLs	TCF7	-0.156953	0.0299067	-5.24807	1.537e-07	-0.215569	-0.0983365	0.0161476	0.438984	0.000104209	1.02091
eQTLs	EED	0.193937	0.03696	5.2472	1.54426e-07	0.121496	0.266377	52.8579	0.0429312	0.000104701	1.68134
eQTLs	SRF	0.209207	0.0399823	5.2325	1.67236e-07	0.130844	0.287571	56.0641	0.0304906	0.000113386	1.20987
eQTLs	NR2F2	0.286781	0.0564446	5.08075	3.75941e-07	0.176152	0.397411	86.434	1.60267e-08	0.000254888	2.88754
eQTLs	LEF1	0.127474	0.0252254	5.05342	4.33962e-07	0.0780336	0.176915	13.4664	0.329614	0.000294226	1.46854
eQTLs	EP400	0.129005	0.0256061	5.03808	4.70222e-07	0.0788185	0.179193	65.9362	0.00316958	0.000318811	2.91414
eQTLs	RCOR1	0.120501	0.0240991	5.00021	5.72664e-07	0.0732674	0.167734	38.7123	0.108615	0.000388266	2.45643
eQTLs	RBM22	0.113633	0.0227458	4.99578	5.85977e-07	0.0690521	0.158214	18.2058	0.151009	0.000397292	2.37204
eQTLs	CBFB	0.0972141	0.019929	4.87803	1.07148e-06	0.0581541	0.136274	0	0.920777	0.000726461	1.51807
eQTLs	SRSF4	0.249601	0.0514003	4.85601	1.19774e-06	0.148858	0.350343	0	0.730282	0.000812068	0.243992
eQTLs	DPF2	0.236388	0.0492964	4.79523	1.62491e-06	0.139768	0.333007	91.5012	5.92769e-15	0.00110169	5.03853
eQTLs	HNF4G	0.176473	0.0371788	4.74661	2.06853e-06	0.103604	0.249342	13.3902	0.133527	0.00140246	1.20161
eQTLs	TAF7	0.21077	0.0444293	4.74396	2.09583e-06	0.123691	0.29785	58.6413	0.0410089	0.00142098	1.27683
eQTLs	NCOA4	-0.510199	0.10793	-4.72713	2.27718e-06	-0.721738	-0.29866	0	0.92311	0.00154393	0.103651
eQTLs	ZBTB33	0.0998382	0.0214279	4.65927	3.17333e-06	0.0578404	0.141836	27.3303	0.214505	0.00215152	4.69455
eQTLs	ZBTB5	-0.274332	0.0591573	-4.63733	3.52931e-06	-0.390278	-0.158386	16.253	0.322813	0.00239287	0.361402
eQTLs	E2F4	0.154042	0.033434	4.60735	4.07837e-06	0.0885125	0.219571	0	0.624953	0.00276513	0.430196
eQTLs	RELB	0.372462	0.0812044	4.58672	4.50259e-06	0.213304	0.53162	89.9585	1.03123e-09	0.00305275	2.40415
eQTLs	BCOR	-0.165972	0.0372941	-4.45035	8.57312e-06	-0.239067	-0.0928766	47.3341	0.0648802	0.00581257	1.83636
eQTLs	STAT3	0.293996	0.0661583	4.44383	8.83698e-06	0.164329	0.423664	78.3685	2.56555e-05	0.00599147	1.56669
eQTLs	CCAR2	-0.26515	0.059704	-4.44107	8.95117e-06	-0.382167	-0.148132	0	0.979455	0.00606889	0.235737
eQTLs	FOS	0.230015	0.0520989	4.41497	1.01024e-05	0.127903	0.332127	79.6245	2.7831e-05	0.00684941	3.37278
eQTLs	MITF	0.217538	0.0492926	4.4132	1.01852e-05	0.120927	0.31415	36.9881	0.189343	0.00690559	1.40983
eQTLs	HDAC3	-0.208314	0.0475142	-4.38426	1.16382e-05	-0.30144	-0.115188	2.82362	0.453902	0.00789068	0.486149
eQTLs	KAT2A	-2.44754	0.563084	-4.34667	1.38222e-05	-3.55116	-1.34391	0	0.42518	0.00937147	0.0229316
eQTLs	PAX5	0.177754	0.0409575	4.33996	1.42508e-05	0.0974787	0.258029	77.9215	2.77944e-11	0.00966207	1.19061
eQTLs	HDAC1	0.119862	0.0276343	4.33743	1.44161e-05	0.0656996	0.174024	81.3833	1.2419e-06	0.0097741	5.35406
eQTLs	ZKSCAN1	-0.123631	0.0286625	-4.31333	1.60812e-05	-0.179808	-0.0674534	0	0.75417	0.010903	0.983306
eQTLs	CREB1	0.181367	0.0426622	4.25123	2.12596e-05	0.0977506	0.264983	78.6231	2.78924e-05	0.014414	2.87654
eQTLs	FUS	0.153758	0.0361711	4.25086	2.12951e-05	0.0828641	0.224652	59.3386	0.012921	0.0144381	1.15392
eQTLs	BRD4	0.109754	0.0258962	4.23822	2.25299e-05	0.0589983	0.16051	33.3527	0.17044	0.0152753	1.24564
eQTLs	L3MBTL2	0.205001	0.0483889	4.23652	2.27007e-05	0.11016	0.299841	92.5162	4.8461e-19	0.0153911	4.54504
eQTLs	NR3C1	0.209675	0.0497549	4.21415	2.50717e-05	0.112157	0.307193	70.8744	0.00399923	0.0169986	2.10328
eQTLs	TAF9B	0.15626	0.0371982	4.20074	2.66044e-05	0.0833528	0.229167	45.0992	0.0208775	0.0180378	1.24197
eQTLs	PCBP1	0.1338	0.0319892	4.18267	2.88106e-05	0.0711025	0.196498	62.1939	0.00474196	0.0195336	2.21336
eQTLs	ZNF579	0.187913	0.0453388	4.14464	3.40346e-05	0.0990507	0.276776	51.4666	0.0379878	0.0230754	0.926436
eQTLs	ZBTB8A	-1.34585	0.333286	-4.03811	5.38842e-05	-1.99908	-0.692617	45.9812	0.0965308	0.0365335	0.0476977
eQTLs	FOXK2	0.0896838	0.0224432	3.99604	6.4412e-05	0.045696	0.133672	42.3498	0.0343257	0.0436713	2.41515
eQTLs	MTA1	0.132052	0.0330666	3.99353	6.50969e-05	0.0672431	0.196862	5.22245	0.484285	0.0441357	1.45386
eQTLs	MEF2C	-0.228099	0.0574916	-3.96753	7.26229e-05	-0.340781	-0.115418	26.2619	0.247749	0.0492383	0.427445
eQTLs	ZNF217	0.137971	0.0356149	3.87398	0.000107072	0.0681675	0.207775	84.0481	1.76432e-12	0.0725945	2.83618
eQTLs	ZEB2	-0.0997308	0.025899	-3.85075	0.000117756	-0.150492	-0.0489696	0.09481	0.632034	0.0798389	1.92258
eQTLs	MIER1	-0.174981	0.0465759	-3.7569	0.000172028	-0.266268	-0.0836941	0	0.866348	0.116635	0.586131
eQTLs	NBN	0.158826	0.0425505	3.73265	0.000189475	0.0754287	0.242224	81.891	3.27166e-06	0.128464	3.31774
eQTLs	EWSR1	-3.38069	0.911573	-3.70863	0.00020838	-5.16734	-1.59404	81.6744	9.44532e-06	0.141282	0.0467804
eQTLs	NFE2	0.288068	0.0777102	3.70695	0.000209772	0.135759	0.440377	61.6912	0.0197737	0.142225	0.752156
eQTLs	GMEB1	0.167694	0.0458443	3.6579	0.000254292	0.0778405	0.257547	86.6629	5.02311e-09	0.17241	2.41607
eQTLs	RUNX1	0.124785	0.0344531	3.62187	0.00029248	0.0572579	0.192312	0	0.630079	0.198301	0.556779
eQTLs	MGA	0.13992	0.0389853	3.58905	0.000331886	0.0635104	0.21633	73.0575	0.000337241	0.225019	2.21519
eQTLs	HSF1	-0.176949	0.0493055	-3.58883	0.000332159	-0.273586	-0.0803123	0	0.748299	0.225204	0.242157
eQTLs	TRIM28	-0.0665716	0.0192723	-3.45427	0.000551776	-0.104345	-0.0287987	0	0.991149	0.374104	2.48853
eQTLs	SREBF2	0.132989	0.0389317	3.41596	0.000635584	0.0566842	0.209293	0	0.742749	0.430926	0.54302
eQTLs	CC2D1A	-0.148315	0.0445345	-3.33035	0.000867366	-0.235601	-0.0610295	16.3251	0.466011	0.588074	1.25482
eQTLs	RBM14	-0.148044	0.0447514	-3.30815	0.000939153	-0.235755	-0.060333	0	0.903106	0.636746	0.287103
eQTLs	AFF1	-0.123044	0.038581	-3.18922	0.00142655	-0.198661	-0.0474261	68.787	0.000154234	0.967204	1.4135
eQTLs	GATA3	0.0706527	0.0226524	3.11899	0.00181469	0.0262548	0.11505	0	0.684778	1	2.19868
eQTLs	HNRNPUL1	0.127781	0.04098	3.11813	0.00182002	0.0474617	0.2081	0.868074	0.313409	1	0.379747
eQTLs	BMI1	0.125914	0.0405124	3.10804	0.00188334	0.0465112	0.205317	25.6004	0.246874	1	0.858558
eQTLs	MLLT1	0.0782441	0.0255157	3.06651	0.00216572	0.0282343	0.128254	27.9143	0.274992	1	3.50303
eQTLs	GATA2	0.20546	0.0670193	3.06569	0.00217171	0.0741047	0.336815	69.6676	0.00330457	1	1.49881
eQTLs	IKZF1	0.206731	0.0687128	3.00863	0.00262429	0.0720568	0.341406	97.1177	8.52849e-52	1	7.05283
eQTLs	PHB2	-0.288496	0.097092	-2.97137	0.00296476	-0.478793	-0.0981994	0	0.853726	1	0.243075
eQTLs	ZNF512B	-0.246554	0.083578	-2.94999	0.00317784	-0.410364	-0.0827444	43.2911	0.0782802	1	0.327463
eQTLs	PTBP1	0.09978	0.0339004	2.94333	0.00324703	0.0333365	0.166223	0.00254471	0.365995	1	0.842965
eQTLs	SPI1	0.454727	0.155856	2.91761	0.00352727	0.149255	0.7602	97.057	2.87963e-71	1	1.98312
eQTLs	BRD9	-0.139536	0.0480506	-2.90393	0.00368514	-0.233713	-0.045358	55.0457	0.00958612	1	1.00807
eQTLs	ZNF207	0.122426	0.042372	2.8893	0.003861	0.0393779	0.205473	69.7912	0.00260237	1	1.65658
eQTLs	FOXA2	0.0730132	0.0262193	2.78471	0.00535753	0.0216243	0.124402	5.06966	0.550114	1	2.24913
eQTLs	SOX13	-0.123516	0.0446696	-2.76511	0.00569036	-0.211067	-0.0359655	0	0.834253	1	0.481563
eQTLs	PML	0.0497093	0.01806	2.75245	0.00591518	0.0143123	0.0851063	0.0299397	0.356131	1	1.72079
eQTLs	NFE2L2	0.120376	0.0438092	2.74772	0.00600104	0.0345112	0.20624	31.7951	0.248174	1	0.706292
eQTLs	CBX5	-0.174798	0.0637586	-2.74156	0.00611476	-0.299763	-0.0498337	45.5943	0.0954016	1	0.501743
eQTLs	ZNF263	0.0681137	0.0249447	2.73059	0.00632219	0.0192229	0.117004	35.1824	0.126425	1	2.3592
eQTLs	ZNF318	-0.170399	0.0629169	-2.70832	0.00676253	-0.293714	-0.0470841	44.1569	0.0861042	1	0.511833
eQTLs	FOXM1	-0.0765291	0.0282718	-2.7069	0.00679141	-0.131941	-0.0211173	9.50858	0.676276	1	1.04751
eQTLs	CBX8	0.3807	0.141288	2.69449	0.00704954	0.10378	0.65762	0.00224238	0.635681	1	0.0532012
eQTLs	SMAD1	0.0926511	0.0348983	2.65489	0.00793352	0.0242516	0.161051	45.8614	0.0668534	1	1.18052
eQTLs	MEF2A	0.148657	0.0560478	2.65234	0.00799366	0.038806	0.258509	64.2064	0.00630085	1	0.714548
eQTLs	ZNF574	0.112414	0.043359	2.59263	0.00952457	0.0274317	0.197396	12.187	0.36649	1	0.326546
eQTLs	NFIB	0.0714659	0.027672	2.58261	0.00980569	0.0172298	0.125702	0.00426423	0.610982	1	1.10255
eQTLs	ZBTB40	0.0644383	0.0250267	2.57478	0.0100303	0.0153869	0.11349	59.2013	0.0154588	1	2.79398
eQTLs	ESR1	0.148804	0.0582556	2.55433	0.0106392	0.0346251	0.262983	43.4739	0.0368305	1	0.737479
eQTLs	NR2F1	-0.0996642	0.039338	-2.53353	0.011292	-0.176765	-0.022563	47.3688	0.0574275	1	1.78499
eQTLs	TFAP4	0.0562046	0.0223675	2.51278	0.0119783	0.0123652	0.100044	5.84205	0.368026	1	1.54284
eQTLs	ZSCAN29	0.092243	0.0367871	2.50748	0.0121595	0.0201416	0.164344	55.9779	0.0216213	1	1.51257
eQTLs	KDM5A	0.0925881	0.0371006	2.4956	0.0125744	0.0198724	0.165304	80.9462	6.0722e-07	1	2.14823
eQTLs	ARID3A	0.070519	0.0283463	2.48777	0.0128547	0.0149613	0.126077	42.9743	0.0854009	1	1.91066
eQTLs	ZNF384	-0.117101	0.0472361	-2.47905	0.0131732	-0.209682	-0.0245197	45.9947	0.102888	1	1.49422
eQTLs	SUZ12	0.0926445	0.037507	2.47006	0.0135091	0.0191321	0.166157	46.8611	0.0599318	1	1.68134
eQTLs	NR0B1	-6.50378	2.73855	-2.3749	0.0175539	-11.8712	-1.13631	0	0.999868	1	0.00642084
eQTLs	ARNT	0.108299	0.0486089	2.22797	0.0258824	0.0130276	0.203571	67.2207	0.0104267	1	2.34269
eQTLs	ZNF639	0.100222	0.0451298	2.22074	0.0263685	0.0117689	0.188674	85.1964	7.89859e-07	1	1.70061
eQTLs	PRPF4	0.0517176	0.0233223	2.21751	0.026588	0.00600667	0.0974286	0	0.727807	1	1.16401
eQTLs	ZEB1	0.0961269	0.0439746	2.18596	0.0288183	0.00993824	0.182315	0	0.991525	1	0.536599
eQTLs	CEBPB	0.239914	0.109941	2.18221	0.0290938	0.0244343	0.455394	93.1942	1.1229e-23	1	2.22161
eQTLs	EHMT2	0.0664553	0.0305077	2.17831	0.0293826	0.00666137	0.126249	5.00465	0.597996	1	1.05669
eQTLs	CLOCK	0.0525531	0.0246839	2.12904	0.033251	0.00417345	0.100933	0	0.970254	1	1.31994
eQTLs	NFXL1	0.132844	0.0632007	2.10194	0.0355588	0.00897282	0.256715	0	0.520715	1	0.424693
eQTLs	WRNIP1	-0.085555	0.0411583	-2.07868	0.0376468	-0.166224	-0.00488612	0	0.516602	1	0.451293
eQTLs	STAT1	0.0917164	0.0446228	2.05537	0.0398431	0.00425737	0.179175	29.4858	0.215102	1	1.07687
eQTLs	PLRG1	-3.35335	1.63443	-2.05169	0.0401999	-6.55678	-0.149919	0	0.984408	1	0.0137589
eQTLs	ZBTB7B	0.0834976	0.0408782	2.0426	0.0410925	0.00337784	0.163617	0	0.778326	1	0.607228
eQTLs	RFX5	0.0980143	0.04929	1.98852	0.046754	0.00140763	0.194621	76.7709	3.42071e-05	1	1.76848
eQTLs	JUN	0.0565226	0.0285413	1.98038	0.0476605	0.000582777	0.112462	0	0.526283	1	1.44652
eQTLs	HNRNPK	0.0560745	0.028362	1.9771	0.0480305	0.000485976	0.111663	49.7694	0.0317012	1	1.80701
eQTLs	PRDM10	0.0536498	0.0273366	1.96256	0.0496971	7.10275e-05	0.107229	0	0.983017	1	1.66025
eQTLs	ETV4	0.0654621	0.0334021	1.95982	0.0500172	-4.92177e-06	0.130929	59.1425	0.0121092	1	1.56302
eQTLs	ZNF407	-0.107439	0.0553881	-1.93975	0.05241	-0.215998	0.0011196	47.5191	0.0810619	1	0.448542
eQTLs	HNRNPH1	-0.114198	0.0590161	-1.93503	0.0529866	-0.229867	0.00147152	35.2743	0.165399	1	0.257751
eQTLs	CREBBP	-1.80966	0.943551	-1.91793	0.0551205	-3.65899	0.0396662	29.3712	0.0747342	1	0.00642084
eQTLs	IRF3	0.080606	0.0420686	1.91606	0.0553572	-0.00184688	0.163059	48.4737	0.0347637	1	0.565951
eQTLs	GATA4	0.0424845	0.0224153	1.89534	0.0580478	-0.00144865	0.0864177	0	0.545151	1	1.07045
eQTLs	NR2C2	0.164137	0.0870153	1.8863	0.0592544	-0.00640978	0.334684	18.7198	0.244993	1	0.0788846
eQTLs	E2F7	-0.144473	0.0766885	-1.88389	0.0595795	-0.29478	0.0058338	17.3637	0.382737	1	0.210053
eQTLs	HES1	-0.0883653	0.047153	-1.87401	0.0609289	-0.180784	0.00405294	56.9562	0.0163392	1	0.562282
eQTLs	SAFB	0.067456	0.0361316	1.86695	0.0619083	-0.00336069	0.138273	21.6753	0.375202	1	0.609063
eQTLs	MCM2	-0.274858	0.148015	-1.85696	0.0633169	-0.564962	0.0152462	5.51944	0.58168	1	0.136672
eQTLs	ATM	-0.534667	0.291854	-1.83197	0.0669563	-1.10669	0.0373563	0	0.313568	1	0.0311869
eQTLs	KAT2B	-0.157056	0.0863054	-1.81977	0.0687943	-0.326211	0.0120997	0	0.909804	1	0.104568
eQTLs	U2AF1	0.0556247	0.0309027	1.8	0.0718608	-0.00494335	0.116193	35.8916	0.168409	1	1.24748
eQTLs	BRCA1	0.0999161	0.0555683	1.79808	0.0721649	-0.00899583	0.208828	0.00325482	0.180293	1	0.365071
eQTLs	TBX3	0.0436889	0.0243212	1.79632	0.0724429	-0.00397991	0.0913576	27.9087	0.374909	1	0.88791
eQTLs	HDAC6	0.0641651	0.0362864	1.76829	0.0770116	-0.00695498	0.135285	0.00090082	0.363351	1	0.668685
eQTLs	ATF3	0.0536997	0.0304731	1.7622	0.0780357	-0.00602652	0.113426	57.6539	0.0165979	1	3.42231
eQTLs	ZBTB1	-0.448685	0.256232	-1.75108	0.0799314	-0.950891	0.0535217	0.00015927	0.681507	1	0.0440286
eQTLs	ARID2	-0.0925735	0.0530435	-1.74524	0.0809434	-0.196537	0.0113898	0	0.721511	1	0.437534
eQTLs	CHD7	-0.179488	0.103551	-1.73333	0.0830369	-0.382445	0.0234681	0	0.576798	1	0.160521
eQTLs	ZHX1	0.0797283	0.0461416	1.72791	0.084005	-0.0107075	0.170164	0	0.66899	1	0.539351
eQTLs	PYGO2	-0.13159	0.0786848	-1.67237	0.0944523	-0.285809	0.0226297	0	0.852689	1	0.207301
eQTLs	STAT5A	0.0484179	0.0294134	1.64611	0.0997401	-0.00923137	0.106067	18.3987	0.378639	1	1.19611
eQTLs	IKZF2	0.0872129	0.0530865	1.64284	0.100415	-0.0168348	0.191261	86.0573	2.85958e-10	1	3.07375
eQTLs	HMBOX1	-0.116791	0.0716787	-1.62937	0.103235	-0.257279	0.0236966	61.1564	0.0103937	1	1.03192
eQTLs	SMARCE1	0.0754432	0.046412	1.62551	0.104054	-0.0155227	0.166409	69.1439	0.00188294	1	2.11613
eQTLs	FOSL2	0.0463879	0.0290026	1.59944	0.109723	-0.0104561	0.103232	33.5812	0.187385	1	1.75564
eQTLs	MCM3	-0.57902	0.364957	-1.58654	0.112616	-1.29432	0.136283	0	0.778952	1	0.0513667
eQTLs	CBFA2T3	-0.0974899	0.0615087	-1.58498	0.112972	-0.218045	0.023065	72.6449	0.000101997	1	1.5566
eQTLs	SKIL	0.0447376	0.0285739	1.56568	0.117424	-0.0112663	0.100741	56.9794	0.020334	1	2.83159
eQTLs	CBX2	-0.194674	0.124807	-1.5598	0.118806	-0.43929	0.0499427	0	0.677695	1	0.138507
eQTLs	U2AF2	0.0659066	0.0425414	1.54923	0.121325	-0.017473	0.149286	10.0271	0.457056	1	0.309118
eQTLs	KDM4B	-0.0398826	0.026035	-1.53189	0.12555	-0.0909102	0.0111449	0	0.867613	1	0.974133
eQTLs	DACH1	0.0524095	0.0343321	1.52654	0.126875	-0.0148802	0.119699	0	0.753304	1	0.749404
eQTLs	IRF2	-0.0606016	0.0400152	-1.51446	0.129908	-0.13903	0.0178268	6.00754	0.378643	1	0.643919
eQTLs	MCM7	-0.175113	0.116812	-1.4991	0.133847	-0.404061	0.0538343	0	0.761632	1	0.19446
eQTLs	NFIC	0.0860878	0.057562	1.49557	0.134767	-0.0267317	0.198907	83.6257	7.0481e-06	1	3.31957
eQTLs	NFATC1	-0.0486046	0.0329044	-1.47714	0.139637	-0.113096	0.0158869	0	0.893651	1	0.852137
eQTLs	NCOA2	-0.120416	0.0816233	-1.47526	0.140142	-0.280394	0.0395631	0	0.838389	1	0.155017
eQTLs	NUFIP1	-0.131796	0.0902178	-1.46086	0.144054	-0.308619	0.045028	50.8871	0.0360407	1	0.199046
eQTLs	ZZZ3	0.074183	0.0530782	1.39762	0.162228	-0.0298483	0.178214	0	0.972816	1	0.270593
eQTLs	PCBP2	-0.107604	0.0776068	-1.38653	0.165585	-0.259711	0.0445024	0	0.893703	1	0.227481
eQTLs	THAP1	0.0612571	0.0445366	1.37543	0.168998	-0.0260331	0.148547	45.9838	0.108814	1	0.542102
eQTLs	MAFK	-0.059911	0.0438044	-1.36769	0.171409	-0.145766	0.0259441	54.9963	0.0333149	1	2.16657
eQTLs	PAX8	0.0967153	0.0713495	1.35552	0.175253	-0.0431271	0.236558	0	0.982999	1	0.255916
eQTLs	SMARCA5	-0.056165	0.0420721	-1.33497	0.181886	-0.138625	0.0262948	64.0105	0.0113081	1	2.31242
eQTLs	GATAD2A	0.0516986	0.0388929	1.32926	0.183764	-0.0245301	0.127927	26.5917	0.298215	1	0.806274
eQTLs	SIX5	0.0538108	0.040691	1.32243	0.186027	-0.0259421	0.133564	50.3747	0.0415623	1	0.984223
eQTLs	E2F1	-0.0454493	0.0344778	-1.31822	0.18743	-0.113024	0.0221259	71.9141	0.000616824	1	1.96753
eQTLs	ZMIZ1	0.129062	0.10166	1.26954	0.204248	-0.0701886	0.328312	0.00202998	0.65813	1	0.0623739
eQTLs	TAL1	0.0509476	0.0401736	1.26819	0.204731	-0.0277912	0.129686	15.0002	0.373483	1	1.13557
eQTLs	EBF1	-0.10596	0.0843455	-1.25626	0.209023	-0.271274	0.0593546	70.2367	0.00149307	1	0.94845
eQTLs	TRIM24	0.0821966	0.0655378	1.25419	0.209774	-0.0462551	0.210648	67.2811	0.00490197	1	1.70886
eQTLs	THRA	-0.481971	0.38598	-1.24869	0.211778	-1.23848	0.274537	21.223	0.226072	1	0.0467804
eQTLs	NCOA6	-0.075959	0.0615461	-1.23418	0.217135	-0.196587	0.0446691	38.027	0.15677	1	0.343974
eQTLs	SREBF1	-0.0353225	0.029829	-1.18417	0.236347	-0.0937862	0.0231412	0	0.728717	1	0.76408
eQTLs	NANOG	0.0852957	0.0721838	1.18165	0.237346	-0.0561818	0.226773	37.5545	0.119886	1	0.330215
eQTLs	NCOA1	0.0233554	0.0199465	1.1709	0.241637	-0.015739	0.0624498	12.3583	0.0984879	1	1.95469
eQTLs	CREB3L1	-0.0500678	0.0444582	-1.12618	0.260091	-0.137204	0.0370687	80.4907	1.83022e-06	1	2.05559
eQTLs	RLF	-0.0399718	0.0356278	-1.12193	0.261893	-0.109801	0.0298574	21.5692	0.222878	1	0.818198
eQTLs	HNF1A	-0.0726899	0.0677858	-1.07235	0.283564	-0.205548	0.0601679	28.8159	0.276952	1	0.552192
eQTLs	SMARCC2	0.0438438	0.04121	1.06391	0.287369	-0.0369263	0.124614	1.6576	0.665678	1	0.854889
eQTLs	ATF2	0.0367167	0.0352449	1.04176	0.297525	-0.0323622	0.105796	59.4941	0.0127419	1	2.65548
eQTLs	TCF7L2	0.0192339	0.0190682	1.00869	0.313125	-0.0181392	0.0566069	0.112392	0.514649	1	1.15575
eQTLs	CHAMP1	-0.0340109	0.0343046	-0.991441	0.32147	-0.101247	0.0332248	0.0209328	0.177595	1	0.653091
eQTLs	WHSC1	-0.173498	0.177351	-0.978275	0.327938	-0.5211	0.174104	16.2676	0.2116	1	0.069712
eQTLs	IRF5	0.0531606	0.0565277	0.940434	0.346995	-0.0576318	0.163953	0	0.984401	1	0.165107
eQTLs	BATF	0.0998452	0.107204	0.931354	0.351671	-0.110271	0.309962	76.6003	0.000141544	1	0.546689
eQTLs	ARHGAP35	-0.0613319	0.0689231	-0.889859	0.373542	-0.196419	0.073755	0.00474748	0.438648	1	0.210053
eQTLs	KAT8	0.062673	0.0706422	0.887189	0.374977	-0.0757831	0.201129	0	0.955768	1	0.121996
eQTLs	TBX21	0.0448264	0.0516305	0.868215	0.385277	-0.0563675	0.14602	73.1093	0.000164798	1	1.3869
eQTLs	SOX6	0.0305715	0.0357298	0.85563	0.392203	-0.0394577	0.100601	58.2954	0.0309034	1	1.98679
eQTLs	RNF2	0.017273	0.0208707	0.827621	0.407885	-0.0236328	0.0581788	56.0457	0.0238465	1	4.3148
eQTLs	FOSL1	0.0592437	0.0722554	0.81992	0.412262	-0.0823743	0.200862	14.29	0.261442	1	0.288021
eQTLs	RAD51	-0.0195501	0.0251057	-0.778711	0.43615	-0.0687563	0.0296562	0.0181562	0.372804	1	1.57035
eQTLs	SMAD2	0.305939	0.399996	0.764855	0.444358	-0.478039	1.08992	0	0.744254	1	0.0100899
eQTLs	SKI	0.0256351	0.0337213	0.760203	0.447133	-0.0404576	0.0917277	65.4377	0.00503087	1	2.20602
eQTLs	E2F8	0.0141907	0.0187708	0.755994	0.449653	-0.0225995	0.0509809	0	0.736765	1	1.39699
eQTLs	CBFA2T2	-0.0576774	0.0781845	-0.737709	0.460691	-0.210916	0.0955614	66.082	0.00145125	1	0.933774
eQTLs	RBM34	0.0534167	0.0729045	0.732694	0.463745	-0.0894735	0.196307	0	0.955699	1	0.141258
eQTLs	MYNN	-0.0283967	0.039051	-0.727171	0.467122	-0.104935	0.0481418	27.8337	0.216146	1	0.869565
eQTLs	TBL1XR1	0.0231025	0.0319815	0.722371	0.470066	-0.03958	0.085785	63.1428	0.00547264	1	2.08219
eQTLs	SAFB2	-0.442447	0.62573	-0.70709	0.47951	-1.66885	0.78396	0.000261909	0.82152	1	0.00366905
eQTLs	SIX4	0.0767754	0.110553	0.694469	0.487388	-0.139904	0.293455	0	0.44181	1	0.0935608
eQTLs	NCOR1	-0.0232892	0.0342161	-0.680651	0.496093	-0.0903517	0.0437732	51.9828	0.0581769	1	2.83251
eQTLs	ZNF8	0.180257	0.267937	0.67276	0.5011	-0.344889	0.705404	0.000217116	0.522643	1	0.0421941
eQTLs	ZBED1	0.0287104	0.044122	0.650705	0.515237	-0.0577672	0.115188	55.8474	0.0172919	1	1.16401
eQTLs	RBM25	0.0136165	0.0212368	0.641172	0.521411	-0.0280069	0.0552399	15.0472	0.312542	1	1.24197
eQTLs	NFRKB	0.0198955	0.0315957	0.629691	0.528897	-0.0420309	0.0818218	36.6923	0.184872	1	1.88864
eQTLs	ZNF507	0.0461349	0.0735044	0.627648	0.530235	-0.0979311	0.190201	1.63384	0.442517	1	0.151348
eQTLs	JUNB	-0.0603456	0.102344	-0.589634	0.555436	-0.260936	0.140245	77.397	0.000187945	1	0.882407
eQTLs	TRIM22	0.0224116	0.038545	0.581439	0.560944	-0.0531353	0.0979584	78.2049	2.54834e-05	1	2.84627
eQTLs	CUX1	0.0228151	0.0410835	0.555336	0.578665	-0.057707	0.103337	0	0.906713	1	0.835626
eQTLs	STAT2	0.0426948	0.0801188	0.532893	0.594108	-0.114335	0.199725	0	0.976946	1	0.238488
eQTLs	NFATC3	0.0255102	0.0480502	0.530908	0.595483	-0.0686664	0.119687	76.2798	4.31303e-05	1	1.96019
eQTLs	MYBL2	-0.0375831	0.0711669	-0.528098	0.597432	-0.177068	0.101902	0	0.981994	1	0.176114
eQTLs	ZNF282	-0.0226553	0.0433113	-0.52308	0.600918	-0.107544	0.0622333	69.3475	0.00459314	1	1.15116
eQTLs	CHD1	0.0213438	0.0411695	0.518437	0.604154	-0.0593469	0.102034	77.8433	1.01341e-05	1	2.13814
eQTLs	DNMT1	-0.0396264	0.0773003	-0.512629	0.608211	-0.191132	0.11188	0	0.9679	1	0.203632
eQTLs	FOXA1	-0.0129439	0.0262517	-0.493071	0.621962	-0.0643963	0.0385084	54.2545	0.0368731	1	3.11778
eQTLs	NEUROD1	-0.0125548	0.0254701	-0.492923	0.622067	-0.0624752	0.0373656	0	0.594352	1	1.16401
eQTLs	TRIP13	-0.0492467	0.106148	-0.463942	0.642689	-0.257294	0.1588	33.6283	0.187161	1	0.121079
eQTLs	ZNF184	0.0113628	0.0269153	0.42217	0.672901	-0.0413902	0.0641158	0	0.825745	1	0.862227
eQTLs	ARID1B	-0.0185833	0.0440456	-0.421911	0.67309	-0.104911	0.0677445	51.2594	0.0628829	1	1.82352
eQTLs	MAFF	0.0136802	0.0337648	0.40516	0.68536	-0.0524977	0.0798581	27.355	0.0135023	1	1.07778
eQTLs	FOXP1	0.0322409	0.0797617	0.404215	0.686055	-0.124089	0.188571	0	0.711005	1	0.202715
eQTLs	NFYA	0.0279711	0.0710447	0.393711	0.693795	-0.111274	0.167216	0	0.624686	1	0.121079
eQTLs	TEAD4	-0.0103412	0.02689	-0.384575	0.700552	-0.0630448	0.0423623	0	0.724875	1	1.34562
eQTLs	KDM1A	0.00928561	0.0281999	0.329278	0.741945	-0.0459852	0.0645564	56.0324	0.031643	1	4.76243
eQTLs	RBM15	0.0441951	0.141303	0.312768	0.754457	-0.232754	0.321144	0	0.552604	1	0.0330215
eQTLs	EZH2	0.00850072	0.0273646	0.310646	0.756069	-0.045133	0.0621344	43.9596	0.105429	1	2.93432
eQTLs	SNRNP70	-0.0413468	0.138229	-0.299118	0.76485	-0.31227	0.229577	0	0.831141	1	0.0834709
eQTLs	LCORL	0.0209048	0.0715488	0.292176	0.770152	-0.119328	0.161138	19.1621	0.348125	1	0.365071
eQTLs	SMARCB1	0.0315049	0.108208	0.291151	0.770936	-0.18058	0.243589	0	0.543134	1	0.128417
eQTLs	SRSF7	-0.0432253	0.150722	-0.286787	0.774275	-0.338635	0.252185	8.87579e-05	0.148562	1	0.0229316
eQTLs	MTA2	0.0155013	0.0623775	0.248508	0.803741	-0.106756	0.137759	89.2915	1.2296e-16	1	2.52889
eQTLs	XRCC3	0.0630862	0.267176	0.236122	0.813338	-0.460569	0.586742	27.1102	0.261161	1	0.0376078
eQTLs	BCL11A	0.0206779	0.0877871	0.235546	0.813785	-0.151382	0.192738	62.8517	0.0098405	1	0.497156
eQTLs	ATF4	-0.0132201	0.060663	-0.217926	0.827486	-0.132117	0.105677	52.169	0.0643234	1	1.13465
eQTLs	ASH1L	-0.00620902	0.0286178	-0.216964	0.828237	-0.0622989	0.0498809	0	0.495128	1	0.631077
eQTLs	SIRT6	-0.0330494	0.154977	-0.213253	0.831129	-0.336799	0.270701	26.3259	0.208594	1	0.0568703
eQTLs	NCOA3	-0.0198576	0.0959138	-0.207036	0.835982	-0.207845	0.16813	0	0.993341	1	0.235737
eQTLs	POU2F2	0.00725811	0.0392434	0.184951	0.853267	-0.0696575	0.0841738	31.7275	0.230858	1	1.13099
eQTLs	ZNF830	-0.0110696	0.0664496	-0.166586	0.867695	-0.141309	0.119169	28.9562	0.213788	1	0.262337
eQTLs	IRF4	-0.00725359	0.0503671	-0.144014	0.885489	-0.105971	0.0914641	2.2245	0.469545	1	0.715465
eQTLs	SUPT20H	-0.00928574	0.0685751	-0.13541	0.892288	-0.14369	0.125119	0	0.708267	1	0.00275179
eQTLs	COPS2	0.0851818	0.68776	0.123854	0.901431	-1.2628	1.43317	0	0.89519	1	0.0119244
eQTLs	MCM5	-0.0880289	0.735626	-0.119665	0.904748	-1.52983	1.35377	45.9514	0.191448	1	0.034856
eQTLs	XRCC5	-0.00383341	0.0341976	-0.112096	0.910747	-0.0708594	0.0631926	76.8507	9.52166e-05	1	2.70226
eQTLs	MEF2B	-0.00388245	0.0457565	-0.0848501	0.932381	-0.0935636	0.0857987	74.5087	0.000290002	1	2.02073
eQTLs	ETV6	-0.00590345	0.103354	-0.0571189	0.95445	-0.208473	0.196666	87.5344	4.60046e-09	1	1.32269
eQTLs	ZNF274	0.00356426	0.0762835	0.0467239	0.962733	-0.145949	0.153077	0	0.895073	1	0.22106
eQTLs	NR2C1	0.00164458	0.0364468	0.0451226	0.96401	-0.0697899	0.0730791	40.4029	0.0624877	1	1.05944
eQTLs	ZNF280A	-0.00648004	0.151853	-0.0426732	0.965962	-0.304106	0.291146	0.000653706	0.296628	1	0.147679
eQTLs	SRSF9	-0.00787212	0.230535	-0.0341472	0.97276	-0.459712	0.443968	0	0.982808	1	0.00550358
eQTLs	SETDB1	-8.91343e-05	0.00305145	-0.0292104	0.976697	-0.00606987	0.00589161	0	0.707366	1	0.402678
eQTLs	ZNF316	-0.000585423	0.033658	-0.0173933	0.986123	-0.0665539	0.0653831	29.1054	0.0984724	1	1.92717
eQTLs	ZNF444	9.82511e-05	0.0238771	0.00411487	0.996717	-0.0467	0.0468965	0	0.933404	1	1.64924
eQTLs	MYB	-0.000225854	0.0646612	-0.00349289	0.997213	-0.12696	0.126508	0.0239392	0.282564	1	0.213722
eQTLs	ZNF24	3.22336e-05	0.0214451	0.00150307	0.998801	-0.0419994	0.0420639	0.106669	0.315201	1	2.9756
mQTLs	MCM3	1.60295	0.266012	6.02587	1.68207e-09	1.08158	2.12433	0	0.948851	1.14044e-06	4.37608
mQTLs	TRIP13	1.11033	0.166178	6.68159	2.36363e-11	0.784629	1.43603	8.18777	0.46744	1.60254e-08	0.810168
mQTLs	IRF4	0.798724	0.073815	10.8206	2.74888e-27	0.654049	0.943399	14.2452	0.214916	1.86374e-24	1.41976
mQTLs	CBFA2T3	0.610082	0.0714687	8.53636	1.38518e-17	0.470006	0.750158	42.6093	0.0718813	9.39151e-15	0.768945
mQTLs	ESR1	0.601911	0.1065	5.65172	1.58855e-08	0.393174	0.810648	51.0939	0.0358232	1.07703e-05	1.02604
mQTLs	TEAD4	0.591703	0.0913304	6.4787	9.25136e-11	0.412699	0.770707	63.1983	0.0107359	6.27242e-08	2.03168
mQTLs	RAD21	0.572965	0.0359618	15.9326	3.76348e-57	0.502481	0.643449	56.6232	0.0161814	2.55164e-54	3.05439
mQTLs	ZNF143	0.560239	0.0445678	12.5705	3.06829e-36	0.472888	0.64759	46.3329	0.0525775	2.0803e-33	2.14061
mQTLs	USF1	0.55747	0.0490563	11.3639	6.32654e-30	0.461322	0.653619	11.3071	0.455646	4.28939e-27	0.894609
mQTLs	JUN	0.55069	0.0869499	6.33341	2.39793e-10	0.380271	0.721109	66.8228	0.00203958	1.6258e-07	1.03446
mQTLs	FOS	0.528313	0.0419349	12.5984	2.15386e-36	0.446122	0.610504	30.2483	0.216376	1.46032e-33	10.0091
mQTLs	NEUROD1	0.52337	0.0781685	6.6954	2.1508e-11	0.370162	0.676577	49.1844	0.0526199	1.45824e-08	0.507089
mQTLs	NR2F2	0.507003	0.0395419	12.8219	1.23614e-37	0.429502	0.584504	9.63689	0.356152	8.381e-35	5.12652
mQTLs	NANOG	0.451512	0.0993967	4.54253	5.55844e-06	0.256698	0.646326	0	0.96981	0.00376862	1.74489
mQTLs	RCOR1	0.433673	0.0410994	10.5518	4.98378e-26	0.353119	0.514226	10.3946	0.503604	3.379e-23	2.24899
mQTLs	HNF4G	0.427741	0.0553482	7.72818	1.09093e-14	0.31926	0.536221	0	0.675446	7.39654e-12	2.26184
mQTLs	EBF1	0.422297	0.0603596	6.99635	2.6272e-12	0.303994	0.540599	0	0.683758	1.78124e-09	0.284351
mQTLs	CEBPB	0.405874	0.0496188	8.17984	2.84228e-16	0.308623	0.503125	0	0.992667	1.92707e-13	0.401815
mQTLs	MAFF	0.400175	0.0689264	5.80582	6.40497e-09	0.265081	0.535268	0.00728237	0.391202	4.34257e-06	0.660679
mQTLs	HNF4A	0.396639	0.0391056	10.1428	3.56847e-24	0.319993	0.473284	0	0.700353	2.41942e-21	0.5615
mQTLs	EP300	0.37726	0.035421	10.6508	1.72957e-26	0.307837	0.446684	54.3309	0.0256654	1.17265e-23	1.22362
mQTLs	FOXA1	0.36708	0.0470271	7.80571	5.91664e-15	0.274909	0.459252	42.0629	0.0817421	4.01148e-12	0.273381
mQTLs	STAT3	0.354614	0.0445755	7.95535	1.78627e-15	0.267248	0.44198	0	0.525086	1.21109e-12	1.86889
mQTLs	RUNX3	0.351621	0.0753401	4.66711	3.0546e-06	0.203957	0.499285	68.5012	0.003252	0.00207102	0.554851
mQTLs	ZNF316	0.349758	0.0481501	7.2639	3.76074e-13	0.255385	0.44413	3.05595	0.554232	2.54978e-10	3.9951
mQTLs	USF2	0.335293	0.0699425	4.79384	1.63619e-06	0.198208	0.472378	44.5018	0.0685765	0.00110934	1.78556
mQTLs	RXRA	0.331181	0.0488966	6.77309	1.26063e-11	0.235346	0.427017	62.6173	0.00768682	8.54705e-09	0.511633
mQTLs	GATA3	0.32679	0.038678	8.44899	2.93845e-17	0.250982	0.402597	0	0.712097	1.99227e-14	1.24046
mQTLs	MGA	0.313463	0.0556091	5.6369	1.73136e-08	0.204471	0.422455	46.7183	0.0698651	1.17386e-05	2.61634
mQTLs	HMBOX1	0.291643	0.057537	5.06879	4.00355e-07	0.178872	0.404413	0.0138733	0.470658	0.000271441	2.41865
mQTLs	CREB1	0.289956	0.0511897	5.66435	1.47585e-08	0.189626	0.390286	37.7119	0.142577	1.00063e-05	0.866352
mQTLs	NR2F6	0.289192	0.0571625	5.05912	4.212e-07	0.177155	0.401228	40.3702	0.106103	0.000285574	0.410348
mQTLs	PAX5	0.281324	0.0570155	4.93416	8.04976e-07	0.169575	0.393072	0	0.80938	0.000545774	0.573135
mQTLs	CTCF	0.278472	0.0248289	11.2156	3.41748e-29	0.229808	0.327136	55.9248	0.0266187	2.31705e-26	1.60316
mQTLs	IKZF1	0.271717	0.0475462	5.71478	1.09843e-08	0.178528	0.364905	73.3916	0.00259602	7.44738e-06	0.141511
mQTLs	MAX	0.252053	0.0458325	5.49944	3.80995e-08	0.162223	0.341883	68.4368	0.00249813	2.58315e-05	10.4131
mQTLs	ELF1	0.243695	0.0425484	5.72748	1.01933e-08	0.160302	0.327089	33.6891	0.185606	6.91108e-06	0.861143
mQTLs	SMC3	0.243238	0.044	5.52813	3.23656e-08	0.156999	0.329476	44.1046	0.0860006	2.19439e-05	1.28966
mQTLs	MEIS2	0.242515	0.0462163	5.24738	1.54275e-07	0.151932	0.333097	0	0.637323	0.000104599	0.724952
mQTLs	SP1	0.237024	0.0507075	4.67434	2.94899e-06	0.137639	0.336409	78.1192	1.25237e-05	0.00199942	2.6169
mQTLs	SMARCA4	0.235558	0.0303195	7.76917	7.9004e-15	0.176132	0.294983	0.00857998	0.641407	5.35647e-12	2.61246
mQTLs	CTBP1	0.228856	0.0470622	4.86283	1.15718e-06	0.136616	0.321096	39.1601	0.170286	0.000784567	0.593414
mQTLs	BHLHE40	0.222575	0.0334466	6.65462	2.8403e-11	0.157021	0.288129	15.6281	0.394248	1.92572e-08	0.0611699
mQTLs	FOSL2	0.213482	0.0455478	4.687	2.77244e-06	0.12421	0.302754	0	0.619846	0.00187971	2.80694
mQTLs	ELF4	0.203604	0.0450641	4.51811	6.23933e-06	0.115281	0.291928	0	0.717666	0.00423026	0.856267
mQTLs	L3MBTL2	0.197257	0.0377498	5.22539	1.73793e-07	0.123269	0.271246	35.5866	0.134092	0.000117832	1.21043
mQTLs	POLR2A	0.112277	0.0158317	7.09189	1.32297e-12	0.0812473	0.143307	0	0.638048	8.96976e-10	1.18805
mQTLs	ZBTB33	-0.161142	0.0315861	-5.10167	3.36669e-07	-0.223049	-0.0992342	0	0.970752	0.000228262	0.872779
mQTLs	XRCC5	-0.202692	0.0396155	-5.11649	3.1127e-07	-0.280337	-0.125047	7.46677	0.240538	0.000211041	1.29421
mQTLs	EZH2	-0.20283	0.0297569	-6.81623	9.34627e-12	-0.261152	-0.144507	3.65299	0.604698	6.33677e-09	0.680072
mQTLs	ZBTB40	-0.218585	0.0402992	-5.42406	5.82618e-08	-0.29757	-0.1396	0.00642857	0.234953	3.95015e-05	1.0626
mQTLs	RB1	-0.250581	0.0566552	-4.4229	9.7383e-06	-0.361623	-0.139538	30.1668	0.189101	0.00660257	2.01783
mQTLs	TAF15	-0.251695	0.0520931	-4.83164	1.3541e-06	-0.353796	-0.149595	13.6681	0.278756	0.000918081	0.0510857
mQTLs	MTA3	-0.256509	0.046437	-5.52381	3.31733e-08	-0.347524	-0.165494	26.8793	0.0908229	2.24915e-05	1.27803
mQTLs	ATF3	-0.263387	0.0513244	-5.1318	2.8698e-07	-0.36398	-0.162793	36.3924	0.172206	0.000194572	0.563827
mQTLs	NCOA1	-0.263597	0.04293	-6.14018	8.24302e-10	-0.347739	-0.179456	0	0.731727	5.58877e-07	0.862916
mQTLs	GABPB1	-0.272893	0.0392885	-6.94587	3.76134e-12	-0.349897	-0.195889	0	0.765795	2.55019e-09	0.249999
mQTLs	SUZ12	-0.27339	0.0435362	-6.27961	3.39431e-10	-0.358719	-0.188061	0	0.610435	2.30134e-07	2.18195
mQTLs	ETS1	-0.277087	0.0466845	-5.93531	2.93297e-09	-0.368587	-0.185587	0.0105546	0.226438	1.98855e-06	4.8291
mQTLs	ZFX	-0.283827	0.0470938	-6.02684	1.67193e-09	-0.376129	-0.191525	52.26	0.0288968	1.13357e-06	1.42497
mQTLs	GMEB1	-0.2854	0.044653	-6.39151	1.64254e-10	-0.372918	-0.197882	15.268	0.279062	1.11364e-07	2.00642
mQTLs	PHF20	-0.300771	0.0509133	-5.90752	3.47295e-09	-0.40056	-0.200983	0	0.782534	2.35466e-06	0.637075
mQTLs	ZBTB11	-0.30436	0.0688906	-4.41802	9.96081e-06	-0.439383	-0.169337	0	0.717143	0.00675343	1.34984
mQTLs	HNRNPK	-0.337087	0.0688652	-4.89487	9.83691e-07	-0.47206	-0.202113	51.3639	0.0426374	0.000666942	0.482599
mQTLs	RBM22	-0.353739	0.0623677	-5.67183	1.41285e-08	-0.475977	-0.2315	20.3187	0.437981	9.57909e-06	0.430073
mQTLs	RBFOX2	-0.36829	0.0445815	-8.26105	1.44396e-16	-0.455668	-0.280912	70.5	0.000350019	9.79005e-14	2.28035
mQTLs	KLF5	-0.386302	0.0729649	-5.29436	1.19433e-07	-0.529311	-0.243294	25.0558	0.15939	8.09759e-05	1.8403
mQTLs	RBBP5	-0.391857	0.0894199	-4.38222	1.17478e-05	-0.567117	-0.216597	82.243	5.4739e-05	0.00796504	3.8475
mQTLs	AGO2	-0.410778	0.0399764	-10.2755	9.08581e-25	-0.489131	-0.332426	0	0.731825	6.16018e-22	1.4294
mQTLs	SIN3B	-0.418291	0.0745568	-5.61036	2.01902e-08	-0.564419	-0.272162	44.1182	0.090264	1.3689e-05	0.097628
mQTLs	BRD9	-0.423641	0.0580639	-7.29613	2.96167e-13	-0.537444	-0.309838	0.0047318	0.436947	2.00801e-10	0.777589
mQTLs	TAF9B	-0.430044	0.0919568	-4.67659	2.91686e-06	-0.610276	-0.249812	56.9052	0.0222359	0.00197763	0.507865
mQTLs	PTBP1	-0.445976	0.0796889	-5.59647	2.18759e-08	-0.602163	-0.289789	0	0.909046	1.48319e-05	1.2214
mQTLs	FUS	-0.459159	0.0628886	-7.30115	2.85323e-13	-0.582418	-0.3359	0	0.563893	1.93449e-10	2.67264
mQTLs	KDM4B	-0.474626	0.100126	-4.74028	2.13421e-06	-0.67087	-0.278383	51.7782	0.0277362	0.00144699	0.148714
mQTLs	U2AF1	-0.476401	0.0584513	-8.15039	3.62753e-16	-0.590963	-0.361838	0.00143472	0.616938	2.45947e-13	2.49999
mQTLs	FIP1L1	-0.485198	0.0785052	-6.18046	6.3916e-10	-0.639065	-0.331331	59.4923	0.00903956	4.3335e-07	1.68838
mQTLs	STAT5A	-0.50148	0.0729763	-6.87181	6.33901e-12	-0.644511	-0.358449	12.6033	0.248958	4.29785e-09	3.26561
mQTLs	HCFC1	-0.503554	0.0437668	-11.5054	1.23916e-30	-0.589335	-0.417773	0	0.680912	8.40151e-28	0.714978
mQTLs	GATA1	-0.519681	0.0808492	-6.42779	1.29477e-10	-0.678143	-0.36122	48.247	0.0712608	8.77854e-08	1.45722
mQTLs	SMAD1	-0.540224	0.109366	-4.93962	7.82746e-07	-0.754576	-0.325871	56.395	0.0352673	0.000530702	0.243017
mQTLs	CLOCK	-0.54443	0.0609315	-8.93512	4.06739e-19	-0.663853	-0.425006	0	0.921052	2.75769e-16	0.772048
mQTLs	BRD4	-0.546693	0.0617143	-8.85845	8.11355e-19	-0.66765	-0.425735	21.8949	0.21891	5.50099e-16	0.561943
mQTLs	ZSCAN29	-0.5507	0.111478	-4.93999	7.81271e-07	-0.769193	-0.332207	72.3358	0.00124564	0.000529702	0.676747
mQTLs	CBFB	-0.551644	0.104012	-5.30368	1.13494e-07	-0.755503	-0.347785	68.8556	0.00548683	7.69487e-05	0.890398
mQTLs	SAP30	-0.573168	0.0443368	-12.9276	3.14506e-38	-0.660066	-0.486269	0	0.510109	2.13235e-35	2.65435
mQTLs	AGO1	-0.584318	0.0450801	-12.9618	2.01497e-38	-0.672674	-0.495963	0.00457326	0.260115	1.36615e-35	1.16566
mQTLs	ZNF830	-0.6002	0.131127	-4.57723	4.71164e-06	-0.857204	-0.343195	0.000323434	0.290453	0.00319449	0.82668
mQTLs	CBX2	-0.627207	0.141682	-4.42686	9.56156e-06	-0.904899	-0.349515	0	0.775456	0.00648274	0.112699
mQTLs	MEF2C	-0.663641	0.132057	-5.02541	5.0235e-07	-0.922467	-0.404814	15.7708	0.412455	0.000340594	0.400153
mQTLs	ZNF282	-0.665081	0.0804068	-8.27146	1.32332e-16	-0.822676	-0.507487	21.1819	0.265443	8.97211e-14	0.283243
mQTLs	SIX5	-0.666017	0.0735004	-9.06139	1.28793e-19	-0.810075	-0.521958	0	0.414387	8.73217e-17	1.27105
mQTLs	PHF21A	-0.669524	0.142004	-4.71483	2.4191e-06	-0.947846	-0.391202	38.8834	0.119787	0.00164015	0.505649
mQTLs	CHD1	-0.707173	0.0549778	-12.8629	7.28078e-38	-0.814927	-0.599418	0	0.655725	4.93637e-35	4.27735
mQTLs	WRNIP1	-0.743154	0.128525	-5.78216	7.37468e-09	-0.995058	-0.491249	9.58994	0.0414389	5.00003e-06	1.61923
mQTLs	HDAC6	-0.828593	0.0856372	-9.67562	3.82777e-22	-0.996439	-0.660747	0.00186395	0.0350804	2.59523e-19	0.121342
mQTLs	KDM5A	-0.948122	0.0681517	-13.9119	5.36196e-44	-1.0817	-0.814547	50.3481	0.0384534	3.63541e-41	0.257534
mQTLs	ZEB1	-1.04573	0.123684	-8.45484	2.7946e-17	-1.28814	-0.803311	30.416	0.0986158	1.89474e-14	0.751658
mQTLs	ARHGAP35	-1.11773	0.234655	-4.76329	1.90464e-06	-1.57765	-0.657815	36.4978	0.0261022	0.00129135	0.111258
mQTLs	E2F7	-1.16312	0.216152	-5.381	7.40716e-08	-1.58677	-0.739466	21.5492	0.170769	5.02206e-05	1.2941
mQTLs	PAX8	-1.21896	0.235621	-5.1734	2.29876e-07	-1.68077	-0.757151	20.5094	0.00907437	0.000155856	0.317263
mQTLs	PCBP2	-1.23778	0.171727	-7.20787	5.68342e-13	-1.57436	-0.901206	4.6255e-05	0.288971	3.85336e-10	1.16511
mQTLs	SMARCC2	0.415933	0.0960688	4.32953	1.49428e-05	0.227641	0.604225	37.6795	0.126301	0.0101312	0.590976
mQTLs	C11orf30	-0.219659	0.051674	-4.25087	2.1294e-05	-0.320939	-0.11838	3.70163	0.564835	0.0144373	1.1968
mQTLs	PML	-0.33414	0.0797505	-4.18982	2.79174e-05	-0.490448	-0.177832	60.6941	0.0143795	0.018928	0.744566
mQTLs	CHAMP1	0.353485	0.0845329	4.18163	2.89425e-05	0.187804	0.519167	12.5996	0.403139	0.019623	0.403367
mQTLs	TBP	0.145923	0.0348998	4.18121	2.89962e-05	0.077521	0.214326	35.3716	0.106248	0.0196594	2.23481
mQTLs	MBD2	0.269382	0.0644791	4.17781	2.94324e-05	0.143005	0.395758	39.3845	0.0639659	0.0199551	0.846848
mQTLs	TRIM22	0.17718	0.0425777	4.16134	3.16379e-05	0.0937296	0.260631	0	0.761698	0.0214505	1.93749
mQTLs	MLLT1	-0.138855	0.0333907	-4.1585	3.20344e-05	-0.2043	-0.0734107	0.00733467	0.632495	0.0217193	2.1681
mQTLs	CBX3	-0.283561	0.0686203	-4.13232	3.59122e-05	-0.418054	-0.149068	39.503	0.0900197	0.0243484	0.901923
mQTLs	PRDM10	0.30976	0.0761389	4.06835	4.73478e-05	0.16053	0.458989	53.4065	0.0267464	0.0321018	0.941152
mQTLs	NCOA3	0.682101	0.168162	4.05622	4.98726e-05	0.352511	1.01169	0	0.841527	0.0338136	0.227946
mQTLs	GABPA	-0.211961	0.0525764	-4.03148	5.54263e-05	-0.315009	-0.108913	46.7704	0.0882766	0.037579	2.07401
mQTLs	SIRT6	1.39495	0.347677	4.01219	6.01569e-05	0.713514	2.07638	10.6935	0.489865	0.0407864	0.0244901
mQTLs	HSF1	-1.26282	0.318657	-3.96294	7.40325e-05	-1.88737	-0.638262	41.6285	0.0992724	0.050194	0.116134
mQTLs	ZNF263	-0.26999	0.0690946	-3.90754	9.32404e-05	-0.405413	-0.134567	63.6362	0.011655	0.063217	1.6507
mQTLs	TAL1	-0.350025	0.0897715	-3.89906	9.65672e-05	-0.525973	-0.174076	48.9926	0.0548532	0.0654725	0.7818
mQTLs	NFRKB	-0.250322	0.0650203	-3.8499	0.000118166	-0.377759	-0.122884	40.9258	0.0880194	0.0801165	0.936719
mQTLs	CBFA2T2	0.414421	0.107961	3.8386	0.000123735	0.202821	0.626022	52.4297	0.0331746	0.0838925	0.751326
mQTLs	ZBTB5	-0.849317	0.221357	-3.83686	0.000124616	-1.28317	-0.415465	48.4698	0.021697	0.0844896	0.219414
mQTLs	RELB	-0.246638	0.0644011	-3.82971	0.000128292	-0.372862	-0.120414	51.7715	0.0478222	0.0869823	1.44758
mQTLs	NFE2	0.417201	0.109871	3.79717	0.000146357	0.201857	0.632545	58.7722	0.00676686	0.0992297	0.502768
mQTLs	NR2C2	0.681466	0.179794	3.79027	0.000150486	0.329077	1.03386	11.402	0.258781	0.10203	0.0365689
mQTLs	SREBF2	-0.567247	0.150058	-3.78018	0.000156717	-0.861356	-0.273138	41.7327	0.0298443	0.106254	0.224179
mQTLs	PRPF4	-1.27231	0.337266	-3.77241	0.000161682	-1.93334	-0.611275	96.1144	8.81756e-10	0.10962	0.488251
mQTLs	SKI	-0.300047	0.0796879	-3.76527	0.000166366	-0.456232	-0.143861	69.9351	0.000204757	0.112796	1.2788
mQTLs	EHMT2	0.217657	0.0580287	3.75085	0.000176234	0.103923	0.331391	0.0141473	0.243592	0.119487	0.796095
mQTLs	IRF1	-0.170254	0.0457769	-3.7192	0.000199855	-0.259975	-0.0805324	0	0.734652	0.135502	0.919432
mQTLs	RBM34	0.752663	0.206443	3.64587	0.000266485	0.348044	1.15728	0	0.999038	0.180677	0.0489802
mQTLs	BCOR	-0.361091	0.0993833	-3.63332	0.000279797	-0.555879	-0.166304	67.3573	0.00596585	0.189702	1.34851
mQTLs	ZNF579	-0.330086	0.0923766	-3.57326	0.000352563	-0.511141	-0.149031	32.2545	0.192666	0.239037	0.549753
mQTLs	STAT2	-0.593252	0.167768	-3.53614	0.000406013	-0.922072	-0.264433	0.000947372	0.735353	0.275277	0.103723
mQTLs	HNRNPUL1	-1.88827	0.537442	-3.51344	0.000442341	-2.94164	-0.834904	91.3873	0.000545804	0.299907	0.148714
mQTLs	NRF1	-0.182971	0.0526071	-3.47806	0.000505053	-0.286079	-0.0798628	73.7161	0.000779926	0.342426	2.46519
mQTLs	ASH1L	0.251707	0.0743525	3.38532	0.000710947	0.105979	0.397435	0	0.757128	0.482022	0.266732
mQTLs	ZNF217	-0.410953	0.122795	-3.34667	0.000817873	-0.651626	-0.17028	89.0928	1.56877e-08	0.554518	1.67641
mQTLs	SMARCB1	-0.634051	0.189866	-3.33946	0.000839419	-1.00618	-0.26192	0	0.86421	0.569126	0.0851059
mQTLs	FOSL1	0.459217	0.1391	3.30135	0.000962218	0.186586	0.731848	0.00231101	0.416233	0.652384	0.189715
mQTLs	FOXA2	0.218851	0.0676413	3.23547	0.00121444	0.0862766	0.351426	64.44	0.000346077	0.823392	1.89881
mQTLs	HNRNPL	-0.266432	0.0825204	-3.22868	0.00124361	-0.428169	-0.104695	64.2641	0.0216218	0.843171	1.51418
mQTLs	ZNF687	0.113572	0.0359033	3.16328	0.00156001	0.0432032	0.183942	5.40137	0.246882	1	1.7368
mQTLs	SKIL	-0.305666	0.0972295	-3.14376	0.00166793	-0.496232	-0.1151	83.6205	5.39818e-05	1	1.69735
mQTLs	ATF7	0.145904	0.0465107	3.13699	0.0017069	0.0547444	0.237063	20.8743	0.385591	1	3.15679
mQTLs	KDM4A	-0.163405	0.0521009	-3.13632	0.00171083	-0.265521	-0.0612892	63.9138	0.0145667	1	1.61657
mQTLs	ATF4	-0.273281	0.0872553	-3.13197	0.00173636	-0.444298	-0.102264	23.671	0.120235	1	0.843413
mQTLs	ZNF592	0.237706	0.0759643	3.12918	0.00175293	0.0888189	0.386594	65.7888	0.00112395	1	1.69359
mQTLs	BCL3	-0.211861	0.068613	-3.08777	0.00201662	-0.34634	-0.0773824	3.76164	0.53947	1	0.97218
mQTLs	RUNX1	-0.468098	0.153698	-3.04557	0.00232243	-0.76934	-0.166855	49.492	0.0214414	1	0.245234
mQTLs	SPI1	0.378097	0.124809	3.02941	0.00245036	0.133476	0.622717	80.8944	2.43899e-05	1	1.38508
mQTLs	ARID1B	0.225888	0.0747517	3.02185	0.00251234	0.0793778	0.372399	36.9271	0.149991	1	1.3372
mQTLs	SRF	0.309299	0.103422	2.99064	0.00278397	0.106595	0.512003	58.8951	0.0272828	1	0.656136
mQTLs	GATA2	0.143309	0.0486541	2.94548	0.00322459	0.0479491	0.23867	0	0.748373	1	1.45434
mQTLs	ELK1	-0.210117	0.0715327	-2.93736	0.00331025	-0.350319	-0.0699154	33.0404	0.191517	1	0.524709
mQTLs	YY1	0.166263	0.0573283	2.90019	0.0037294	0.0539014	0.278624	84.3855	7.09185e-08	1	4.1918
mQTLs	KDM1A	0.103048	0.0356561	2.89006	0.00385171	0.0331635	0.172933	24.2522	0.489961	1	3.73724
mQTLs	ZNF24	-0.214178	0.0741345	-2.88904	0.00386416	-0.359479	-0.0688769	70.6006	0.000305059	1	1.8966
mQTLs	BCL11A	0.297619	0.103305	2.88097	0.00396452	0.0951448	0.500094	0.000696323	0.403998	1	0.382644
mQTLs	RBM25	-0.328399	0.114131	-2.87738	0.00400986	-0.552092	-0.104706	36.9148	0.0403086	1	0.940376
mQTLs	TAF1	-0.129259	0.0452764	-2.85489	0.00430523	-0.217999	-0.0405188	69.4203	0.000438121	1	2.63407
mQTLs	BATF	0.264338	0.0955333	2.76697	0.00565799	0.077096	0.45158	0.00289868	0.285982	1	0.469856
mQTLs	MAFK	0.126153	0.0465621	2.70935	0.00674143	0.0348932	0.217413	0	0.513163	1	1.85848
mQTLs	RBM14	-0.506182	0.187445	-2.70043	0.00692509	-0.873568	-0.138796	52.3747	0.00561824	1	0.141843
mQTLs	THRA	0.635012	0.238863	2.65848	0.00784947	0.166849	1.10318	0	0.825056	1	0.0377879
mQTLs	CREB3L1	-0.279991	0.106035	-2.64056	0.00827684	-0.487815	-0.072167	72.8936	0.00566112	1	0.961874
mQTLs	EP400	-0.126906	0.0492231	-2.57818	0.00993218	-0.223381	-0.0304306	33.1257	0.202916	1	1.36524
mQTLs	ZEB2	0.165914	0.064654	2.56619	0.0102822	0.039195	0.292634	51.6632	0.0389173	1	1.1722
mQTLs	KLF16	0.257563	0.100933	2.55182	0.0107162	0.0597377	0.455388	48.6951	0.0574286	1	0.493902
mQTLs	KAT8	0.515226	0.203518	2.5316	0.0113542	0.116339	0.914114	20.3205	0.257061	1	0.05031
mQTLs	SMAD5	-0.162536	0.0645706	-2.51719	0.0118296	-0.289092	-0.0359803	56.4707	0.0125922	1	1.11125
mQTLs	ZNF280A	-1.50316	0.600113	-2.50479	0.0122523	-2.67936	-0.326959	58.3205	0.0102366	1	0.108377
mQTLs	TFAP4	-0.157454	0.0629653	-2.50065	0.0123966	-0.280864	-0.0340444	22.6502	0.217447	1	0.929738
mQTLs	CREM	0.143136	0.0578854	2.47275	0.0134077	0.0296829	0.256589	63.9583	0.00489597	1	2.38518
mQTLs	TCF7L2	-0.150968	0.06143	-2.45756	0.0139885	-0.271368	-0.0305672	31.8617	0.148434	1	0.706002
mQTLs	ASH2L	-0.0995715	0.0406852	-2.44736	0.0143906	-0.179313	-0.0198299	61.5439	0.0118589	1	3.03677
mQTLs	HNRNPH1	-0.735499	0.300887	-2.44443	0.014508	-1.32523	-0.14577	46.9577	0.0444987	1	0.117686
mQTLs	MCM2	-1.74673	0.718271	-2.43185	0.0150218	-3.15452	-0.338944	75.3635	9.25982e-05	1	0.103834
mQTLs	SRSF7	-6.02599	2.49105	-2.41906	0.0155609	-10.9084	-1.14362	90.5721	0.00133153	1	0.0108599
mQTLs	MEF2A	0.175827	0.0733022	2.39866	0.0164553	0.0321572	0.319497	0	0.870952	1	0.459217
mQTLs	AFF1	-0.221454	0.0931672	-2.37696	0.0174562	-0.404059	-0.0388498	63.2291	0.0172172	1	0.780359
mQTLs	CBX8	-1.51954	0.640799	-2.37132	0.0177246	-2.77548	-0.263598	10.0307	0.163048	1	0.0518614
mQTLs	NFIC	0.0914394	0.0385765	2.37034	0.0177718	0.0158309	0.167048	0.00240539	0.531296	1	2.30506
mQTLs	ARNT	0.101199	0.0427583	2.36677	0.0179443	0.0173942	0.185004	12.074	0.315681	1	1.45589
mQTLs	MYBL2	0.272965	0.115681	2.35963	0.0182931	0.046234	0.499696	0.000908086	0.177782	1	0.087433
mQTLs	COPS2	-1.99162	0.847376	-2.35034	0.0187564	-3.65245	-0.330794	27.5717	0.143724	1	0.00753542
mQTLs	GATAD2B	-0.169579	0.0727726	-2.33026	0.0197927	-0.31221	-0.026947	72.4302	0.00171529	1	1.91267
mQTLs	HNF1A	-0.453693	0.194997	-2.32666	0.0199833	-0.835881	-0.071505	66.3642	0.00497855	1	0.39029
mQTLs	CCAR2	-0.330589	0.143681	-2.30086	0.0213997	-0.612199	-0.0489798	0	0.704504	1	0.126994
mQTLs	RLF	-0.374082	0.163693	-2.28526	0.0222975	-0.694915	-0.0532489	67.7375	0.0179424	1	0.399377
mQTLs	E2F6	0.16371	0.0718826	2.27747	0.0227582	0.0228231	0.304598	41.6223	0.111434	1	1.04576
mQTLs	NFATC3	-0.184495	0.0810664	-2.27585	0.0228551	-0.343382	-0.0256076	62.5023	0.0173063	1	1.18494
mQTLs	EGR1	0.0769991	0.0338796	2.27273	0.0230425	0.0105964	0.143402	6.83151	0.223224	1	2.56182
mQTLs	STAT1	-0.157874	0.0711733	-2.21817	0.0265433	-0.297371	-0.0183773	6.48851e-05	0.493113	1	0.457666
mQTLs	ZBED1	-0.162782	0.0738853	-2.20317	0.0275829	-0.307594	-0.0179692	7.75547	0.461469	1	0.661344
mQTLs	CREBBP	1.96394	0.894415	2.19578	0.0281073	0.210922	3.71697	0	0.803243	1	0.00808949
mQTLs	E2F8	-0.229993	0.105326	-2.18362	0.0289899	-0.436429	-0.0235572	63.2907	0.0125895	1	0.64727
mQTLs	RAD51	0.109789	0.0506077	2.16941	0.0300517	0.0105995	0.208978	5.80144e-05	0.234637	1	1.07912
mQTLs	SIX4	-0.818152	0.37729	-2.1685	0.0301209	-1.55763	-0.0786775	39.6645	0.0224565	1	0.0715865
mQTLs	ZMIZ1	0.541584	0.249802	2.16805	0.0301548	0.0519807	1.03119	6.41313	0.240352	1	0.0292552
mQTLs	DACH1	0.334554	0.15672	2.13472	0.0327835	0.0273885	0.641718	76.0679	2.89214e-05	1	0.477059
mQTLs	RFX1	0.157062	0.0752703	2.08664	0.0369211	0.00953461	0.304589	56.1992	0.0130733	1	1.25188
mQTLs	ARID3A	-0.197885	0.0964722	-2.05122	0.040246	-0.386967	-0.00880321	74.1636	0.002605	1	1.18062
mQTLs	ZNF207	-0.119064	0.0580951	-2.04946	0.0404171	-0.232928	-0.00519933	17.7575	0.245244	1	0.73282
mQTLs	CDC5L	-0.276557	0.135033	-2.04807	0.0405535	-0.541218	-0.0118967	0.00141357	0.565026	1	0.152481
mQTLs	SNRNP70	-0.680012	0.33489	-2.03055	0.0423004	-1.33638	-0.0236393	0	0.648962	1	0.0352392
mQTLs	HES1	-0.224198	0.111002	-2.01977	0.0434072	-0.441757	-0.00663862	23.0109	0.405355	1	0.400929
mQTLs	KAT2A	-5.72914	2.83954	-2.01763	0.0436296	-11.2945	-0.16375	11.9555	0.830955	1	0.0088652
mQTLs	RBM39	-0.0908468	0.045156	-2.01185	0.0442363	-0.179351	-0.00234272	44.6938	0.0773457	1	2.19048
mQTLs	IRF3	0.168288	0.0837154	2.01024	0.0444058	0.00420887	0.332367	0	0.710937	1	0.199024
mQTLs	SMAD2	1.0112	0.503693	2.00758	0.0446876	0.0239854	1.99842	0	0.974854	1	0.00531912
mQTLs	PKNOX1	0.117175	0.059615	1.96553	0.0493528	0.000331891	0.234018	59.6454	0.0223967	1	2.84506
mQTLs	NCOA6	-0.292353	0.149039	-1.96159	0.0498101	-0.584463	-0.000242523	0	0.900508	1	0.151041
mQTLs	ZNF407	-0.183351	0.0934852	-1.96129	0.0498456	-0.366579	-0.000123628	0	0.894777	1	0.240136
mQTLs	HNRNPLL	-0.163902	0.0837106	-1.95796	0.0502348	-0.327972	0.00016781	77.1177	0.000333001	1	1.71375
mQTLs	BACH1	-0.184823	0.0950298	-1.9449	0.0517876	-0.371078	0.00143202	60.1279	0.0223876	1	1.08045
mQTLs	NCOR1	0.124725	0.0647357	1.92667	0.0540203	-0.00215505	0.251604	59.2786	0.00781062	1	1.83399
mQTLs	ARID2	-0.233843	0.121392	-1.92634	0.0540617	-0.471768	0.00408148	0	0.911936	1	0.333775
mQTLs	GATAD2A	-0.26623	0.140004	-1.90159	0.0572244	-0.540632	0.00817216	57.484	0.016951	1	0.455228
mQTLs	ZZZ3	-1.93829	1.02134	-1.89779	0.0577241	-3.94009	0.0635037	97.7361	1.18976e-06	1	0.0944144
mQTLs	ZHX1	-0.391307	0.2143	-1.82598	0.0678535	-0.811328	0.0287131	81.0837	2.33516e-05	1	0.226173
mQTLs	POLR2G	-0.0783347	0.0432414	-1.81157	0.0700529	-0.163086	0.00641683	64.1082	0.00633223	1	4.16398
mQTLs	SUPT20H	-7.18885	3.98697	-1.80309	0.0713747	-15.0032	0.625467	0	0.848102	1	0.00121896
mQTLs	CBX5	-0.200382	0.112295	-1.78443	0.0743544	-0.420477	0.019712	15.8448	0.397427	1	0.329675
mQTLs	ZHX2	0.158549	0.0892982	1.7755	0.0758158	-0.0164726	0.33357	48.319	0.0453196	1	0.672425
mQTLs	FOXK2	0.143675	0.081224	1.76887	0.0769162	-0.0155217	0.302871	65.6517	0.0024073	1	1.31404
mQTLs	DEAF1	-0.285142	0.162004	-1.76009	0.0783925	-0.602664	0.0323803	55.7087	0.0102621	1	0.158022
mQTLs	FOXP1	0.410904	0.237814	1.72784	0.0840175	-0.0552032	0.877012	2.50123e-05	0.366809	1	0.166887
mQTLs	ZKSCAN1	-0.169633	0.0998867	-1.69826	0.0894592	-0.365408	0.026141	36.749	0.15069	1	0.627878
mQTLs	WHSC1	0.39866	0.235546	1.69249	0.0905523	-0.0630022	0.860322	0	0.937734	1	0.0487586
mQTLs	ZNF507	0.264692	0.157845	1.6769	0.0935616	-0.04468	0.574063	0	0.548293	1	0.0797868
mQTLs	TAF7	-0.225731	0.134929	-1.67296	0.0943352	-0.490188	0.0387253	82.4009	1.0504e-06	1	0.497781
mQTLs	ATF2	-0.122964	0.0737343	-1.66766	0.0953833	-0.26748	0.0215528	66.8816	0.0010549	1	2.03589
mQTLs	CUX1	0.234718	0.141343	1.66063	0.0967877	-0.0423087	0.511746	47.5516	0.112638	1	0.625107
mQTLs	ZNF512B	-0.23469	0.141491	-1.65868	0.0971793	-0.512007	0.0426284	0.000177336	0.142817	1	0.211213
mQTLs	RNF2	-0.0635701	0.0392555	-1.61939	0.105362	-0.14051	0.0133692	50.5846	0.0611387	1	2.79786
mQTLs	ZNF318	-0.23937	0.149604	-1.60003	0.109593	-0.532588	0.0538481	51.401	0.034083	1	0.316266
mQTLs	CC2D1A	0.132769	0.08398	1.58096	0.113888	-0.0318289	0.297367	55.5505	0.0183739	1	0.848178
mQTLs	NFIB	0.124951	0.0792076	1.57751	0.114679	-0.0302936	0.280195	19.1218	0.280886	1	0.779583
mQTLs	MTA2	0.0928813	0.0599248	1.54997	0.12115	-0.0245691	0.210332	53.5158	0.0239934	1	1.79742
mQTLs	TRIM24	0.0923137	0.0595808	1.54939	0.121289	-0.0244625	0.20909	18.1031	0.224413	1	1.09297
mQTLs	NFXL1	-0.195052	0.126202	-1.54555	0.122214	-0.442404	0.0523003	0	0.967167	1	0.302968
mQTLs	NBN	-0.115328	0.07612	-1.51508	0.129751	-0.264521	0.0338644	78.2033	0.000526278	1	1.95212
mQTLs	MYB	-0.37754	0.251314	-1.50226	0.133029	-0.870107	0.115026	45.9815	0.00636763	1	0.102171
mQTLs	MTA1	-0.236073	0.158143	-1.49278	0.135494	-0.546027	0.0738814	80.8938	0.000507434	1	0.842637
mQTLs	TBL1XR1	-0.171054	0.116476	-1.46857	0.141948	-0.399343	0.0572351	83.9936	6.23214e-05	1	1.20578
mQTLs	ZBTB7B	0.136498	0.0933404	1.46237	0.14364	-0.0464458	0.319442	0	0.971198	1	0.315269
mQTLs	SOX13	0.153962	0.105319	1.46186	0.143778	-0.0524594	0.360384	0	0.923291	1	0.317596
mQTLs	LCORL	0.197165	0.13585	1.45134	0.146684	-0.069096	0.463425	0	0.775861	1	0.235925
mQTLs	ETV6	-0.149767	0.104122	-1.43838	0.150325	-0.353841	0.0543077	67.0095	0.0018739	1	0.853719
mQTLs	ZNF444	0.119771	0.0859706	1.39316	0.163571	-0.0487284	0.28827	52.4895	0.0514555	1	1.05917
mQTLs	PHF8	-0.122991	0.0883852	-1.39153	0.164064	-0.296223	0.0502411	87.4869	1.71466e-10	1	1.85072
mQTLs	XRCC3	-0.621278	0.44815	-1.38632	0.165651	-1.49964	0.257081	0	0.86237	1	0.0249334
mQTLs	JUND	0.0643226	0.0475266	1.3534	0.175927	-0.0288277	0.157473	68.2038	0.00193679	1	3.96197
mQTLs	PHB2	0.164625	0.122179	1.34741	0.177847	-0.0748408	0.404091	1.41424e-05	0.26578	1	0.180518
mQTLs	CHD7	-0.193545	0.146399	-1.32204	0.186157	-0.480481	0.0933922	0.00137507	0.309601	1	0.157468
mQTLs	NUFIP1	-0.184013	0.142184	-1.29419	0.195599	-0.462689	0.094662	0.000576916	0.152719	1	0.108045
mQTLs	MCM5	-4.11458	3.22894	-1.27428	0.202564	-10.4432	2.21403	15.36	0.805523	1	0.0309174
mQTLs	ZBTB7A	0.0703396	0.0553844	1.27003	0.204075	-0.0382118	0.178891	51.4781	0.0382053	1	1.48669
mQTLs	SRSF4	-0.301622	0.238141	-1.26657	0.205309	-0.768369	0.165125	54.984	0.0243308	1	0.0948576
mQTLs	BRCA1	-0.155152	0.123231	-1.25903	0.208019	-0.39668	0.0863767	0.0017256	0.248353	1	0.13597
mQTLs	NFYA	0.220875	0.179949	1.22743	0.219661	-0.131819	0.573569	49.4245	0.0524005	1	0.0381204
mQTLs	ZMYM3	-0.172774	0.140812	-1.22699	0.219828	-0.448761	0.103212	66.7465	0.00703234	1	1.17708
mQTLs	NCOA2	-0.238923	0.196797	-1.21406	0.224726	-0.624639	0.146793	0	0.556067	1	0.109042
mQTLs	ZBTB1	-3.21909	2.68613	-1.19841	0.230758	-8.48381	2.04564	29.8474	0.405049	1	0.0377879
mQTLs	REST	-0.0540518	0.0466298	-1.15917	0.246388	-0.145445	0.037341	71.4787	0.00168386	1	3.8824
mQTLs	ZNF384	0.0553298	0.0478453	1.15643	0.247505	-0.0384453	0.149105	0.572333	0.335933	1	1.0462
mQTLs	E2F4	0.244756	0.213407	1.1469	0.251424	-0.173514	0.663027	77.5952	9.35965e-06	1	0.145943
mQTLs	NR0B1	-10.0742	8.91317	-1.13026	0.258365	-27.5437	7.39526	0	0.999359	1	0.00343526
mQTLs	E2F1	0.0588174	0.0525716	1.11881	0.263223	-0.0442211	0.161856	26.3358	0.0943443	1	0.979272
mQTLs	U2AF2	0.117604	0.10637	1.10562	0.268891	-0.0908762	0.326085	0	0.895855	1	0.122007
mQTLs	KAT2B	0.354873	0.321812	1.10273	0.270143	-0.275867	0.985613	0.000747182	0.267336	1	0.0578454
mQTLs	HDAC2	0.0472231	0.0447257	1.05584	0.291042	-0.0404376	0.134884	60.7694	0.00832508	1	3.23691
mQTLs	HDAC3	0.128006	0.124494	1.02822	0.303848	-0.115997	0.37201	49.3073	0.0584958	1	0.297095
mQTLs	IRF5	0.218014	0.215829	1.01012	0.312437	-0.205003	0.641031	9.21637e-06	0.427871	1	0.0726946
mQTLs	GATA4	-0.0795662	0.0798202	-0.996817	0.318854	-0.236011	0.0768787	48.2121	0.0439152	1	0.465645
mQTLs	FOXM1	-0.121189	0.12887	-0.940395	0.347015	-0.373769	0.131392	57.5837	0.025144	1	0.581446
mQTLs	NCOA4	-0.164176	0.178047	-0.922096	0.356479	-0.513142	0.184789	16.259	0.294257	1	0.0657133
mQTLs	NR2C1	-0.0638551	0.0694484	-0.919462	0.357854	-0.199971	0.0722612	0.000257407	0.342768	1	0.546207
mQTLs	SAFB	-0.132616	0.14453	-0.917568	0.358845	-0.415889	0.150657	65.7279	0.00536387	1	0.261302
mQTLs	PYGO2	-0.238098	0.25957	-0.917278	0.358997	-0.746846	0.27065	40.316	0.112524	1	0.123005
mQTLs	E4F1	-0.0419663	0.0458178	-0.915939	0.359699	-0.131768	0.0478349	22.2035	0.226807	1	1.17342
mQTLs	TBX21	-0.0923686	0.101271	-0.912091	0.361721	-0.290857	0.106119	70.8202	0.00200626	1	1.00376
mQTLs	NR3C1	-0.0470329	0.0517313	-0.909177	0.363257	-0.148424	0.0543586	14.6711	0.310225	1	1.26706
mQTLs	ETV4	0.0662982	0.0730591	0.90746	0.364164	-0.076895	0.209491	54.242	0.0130577	1	0.786565
mQTLs	SMARCE1	-0.0698408	0.0810263	-0.861951	0.388714	-0.228649	0.0889679	63.0258	0.0106873	1	1.40846
mQTLs	PLRG1	1.4343	1.67361	0.857009	0.39144	-1.84591	4.71451	0	0.990672	1	0.017398
mQTLs	NFYB	0.0629504	0.076177	0.82637	0.408594	-0.0863537	0.212255	5.30508	0.666308	1	0.37533
mQTLs	DNMT1	-0.0894401	0.108298	-0.825872	0.408877	-0.3017	0.12282	0.00396707	0.713432	1	0.10062
mQTLs	ZNF574	-0.161759	0.197532	-0.818902	0.412843	-0.548915	0.225396	57.5271	0.0172137	1	0.132867
mQTLs	TCF12	-0.0505321	0.0625724	-0.807578	0.419333	-0.173172	0.0721076	70.4663	0.00456697	1	2.6712
mQTLs	KDM5B	0.0794894	0.10019	0.793384	0.427554	-0.11688	0.275859	80.7684	2.58293e-05	1	0.974396
mQTLs	THAP1	-0.191411	0.245794	-0.778744	0.43613	-0.673159	0.290337	82.0666	1.93373e-06	1	0.202127
mQTLs	SMARCA5	-0.0596386	0.0770891	-0.773632	0.439149	-0.21073	0.0914533	61.4817	0.0209977	1	1.47029
mQTLs	NFATC1	-0.0844023	0.110375	-0.764687	0.444458	-0.300733	0.131929	23.2737	0.249323	1	0.564159
mQTLs	MEF2B	-0.0780313	0.10463	-0.745783	0.455798	-0.283102	0.12704	70.3659	0.00712663	1	1.37167
mQTLs	PCBP1	-0.0568888	0.0766696	-0.742	0.458087	-0.207159	0.0933809	53.3749	0.0486544	1	1.06017
mQTLs	MNT	-0.044824	0.06214	-0.721339	0.470701	-0.166616	0.0769682	82.1155	1.3787e-06	1	3.51926
mQTLs	SIN3A	-0.0227882	0.0323049	-0.705408	0.480556	-0.0861047	0.0405283	43.0971	0.0907112	1	3.73591
mQTLs	ZNF184	0.0495616	0.0741249	0.668622	0.503737	-0.0957206	0.194844	7.88598	0.423488	1	0.555183
mQTLs	NR2F1	0.0338614	0.0528015	0.641296	0.521331	-0.0696277	0.13735	0	0.828071	1	1.21265
mQTLs	NFE2L2	0.0386552	0.0621122	0.622345	0.533715	-0.0830825	0.160393	0	0.784893	1	0.476837
mQTLs	LEF1	0.0822386	0.133156	0.617612	0.536831	-0.178742	0.343219	84.1743	5.26198e-07	1	0.842305
mQTLs	SOX6	-0.0439313	0.0715916	-0.613637	0.539455	-0.184248	0.0963857	54.1048	0.0362132	1	1.14749
mQTLs	BMI1	-0.0409931	0.0669925	-0.611905	0.540601	-0.172296	0.0903099	0	0.509038	1	0.600617
mQTLs	SETDB1	-0.111483	0.190054	-0.586584	0.557483	-0.483982	0.261016	72.2193	0.000664877	1	0.17808
mQTLs	RFX5	-0.0613928	0.107208	-0.572648	0.566883	-0.271518	0.148732	80.9281	2.02982e-06	1	0.896161
mQTLs	ZBTB8A	0.327088	0.573566	0.57027	0.568495	-0.797081	1.45126	0	0.587814	1	0.0330229
mQTLs	MIER1	-0.0408813	0.0745407	-0.548444	0.583387	-0.186978	0.105216	0	0.845874	1	0.339315
mQTLs	TBX3	-0.0524618	0.0993616	-0.527988	0.597507	-0.247207	0.142283	41.2445	0.0570034	1	0.509306
mQTLs	HDAC1	-0.0237081	0.047709	-0.496932	0.619237	-0.117216	0.0697998	68.4167	0.00107293	1	3.06304
mQTLs	IRF2	0.0544643	0.111556	0.488225	0.62539	-0.164181	0.273109	38.3391	0.132473	1	0.276373
mQTLs	MYNN	0.0492467	0.105679	0.466003	0.641213	-0.15788	0.256373	46.2186	0.0787784	1	0.517728
mQTLs	MCM7	0.0903353	0.200085	0.451485	0.65164	-0.301823	0.482494	0	0.834703	1	0.148381
mQTLs	EED	0.0325317	0.0752078	0.432558	0.665336	-0.114873	0.179936	31.8696	0.246691	1	1.17553
mQTLs	MITF	0.0353086	0.0820878	0.430132	0.6671	-0.125581	0.196198	34.6791	0.124609	1	0.952012
mQTLs	CBX1	-0.0235474	0.0552312	-0.426341	0.669859	-0.131799	0.0847038	0	0.830708	1	0.657244
mQTLs	ZNF639	-0.0339122	0.0798349	-0.424779	0.670998	-0.190386	0.122561	63.0187	0.0114792	1	0.749663
mQTLs	PBX3	0.0518342	0.122575	0.422879	0.672384	-0.188408	0.292076	41.5219	0.0986159	1	0.249112
mQTLs	SRSF9	-10.7063	26.9724	-0.396934	0.691416	-63.5713	42.1587	0	0.999997	1	0.0066489
mQTLs	ATM	0.313182	0.879889	0.355934	0.72189	-1.41137	2.03773	0	0.787381	1	0.0254874
mQTLs	CHD4	-0.0314677	0.0940904	-0.334441	0.738047	-0.215882	0.152946	58.2425	0.0163769	1	0.790222
mQTLs	TCF7	-0.0290433	0.110392	-0.263092	0.79248	-0.245408	0.187322	58.3581	0.0239713	1	0.765953
mQTLs	RBM15	-0.112552	0.444483	-0.253221	0.800098	-0.983723	0.758619	0	0.999846	1	0.0125221
mQTLs	ZFP91	-0.0151976	0.0602062	-0.252425	0.800712	-0.133199	0.102804	0.00430229	0.0967045	1	0.489691
mQTLs	ZNF274	0.0393095	0.157831	0.24906	0.803314	-0.270034	0.348653	0	0.739105	1	0.14273
mQTLs	TRIM28	-0.00993027	0.0406735	-0.244146	0.807118	-0.0896489	0.0697883	0.0189114	0.179465	1	1.71132
mQTLs	ESRRA	0.0099642	0.0417696	0.238551	0.811453	-0.0719027	0.0918311	0	0.57552	1	1.55695
mQTLs	UBTF	0.0171793	0.0731384	0.234888	0.814296	-0.126169	0.160528	53.6842	0.0339997	1	0.899596
mQTLs	DPF2	0.0173722	0.0741327	0.234339	0.814722	-0.127925	0.16267	85.1854	1.15645e-05	1	3.36279
mQTLs	MYC	-0.0073715	0.036591	-0.201457	0.840342	-0.0790886	0.0643456	49.3006	0.0458107	1	3.43482
mQTLs	IKZF2	0.00791598	0.0473385	0.167221	0.867196	-0.0848657	0.100698	32.9243	0.216814	1	2.08731
mQTLs	SREBF1	-0.0137587	0.0992802	-0.138584	0.889779	-0.208344	0.180827	44.5833	0.0742535	1	0.420986
mQTLs	POU2F2	-0.0179422	0.15094	-0.11887	0.905378	-0.313779	0.277894	63.5503	0.00985357	1	0.593082
mQTLs	MXI1	0.00659259	0.0678852	0.0971138	0.922636	-0.12646	0.139645	78.1418	9.88303e-07	1	2.47539
mQTLs	EWSR1	-0.0501677	0.693632	-0.0723261	0.942342	-1.40966	1.30933	0	0.895757	1	0.0313606
mQTLs	ZBTB2	-0.00217886	0.089834	-0.0242543	0.98065	-0.17825	0.173893	43.8242	0.0567624	1	0.648378
mQTLs	SAFB2	1.28114	69.7186	0.0183759	0.985339	-135.365	137.927	0	1	1	0.00132978
mQTLs	JUNB	0.000689939	0.11357	0.006075	0.995153	-0.221904	0.223283	57.9654	0.0184989	1	0.765177
mQTLs	ZNF8	0.00123516	0.28581	0.00432161	0.996552	-0.558942	0.561413	0	0.999937	1	0.0497559

## Sheet: Open Chromatin - Single Tissue
qtl	tissue	feature	logOR	logORcil	logORciu
mQTLs	Breast	DNASeqBreast	0.054	-0.252	0.36
mQTLs	Colon	DNASeqColon	0.439	0.338	0.541
mQTLs	Kidney	DNASeqKidney	0.194	0.06	0.329
mQTLs	Lung	DNASeqLung	0.217	0.111	0.323
mQTLs	Muscle	DNASeqMuscle	0.247	0.067	0.428
mQTLs	Ovary	DNASeqOvary	-0.022	-0.17	0.127
mQTLs	Prostate	DNASeqProstate	0.205	0.065	0.345
mQTLs	Testis	DNASeqTestis	0.434	0.235	0.633
eQTLs	Breast	DNASeqBreast	0.292	0.203	0.381
eQTLs	Colon	DNASeqColon	0.822	0.733	0.91
eQTLs	Kidney	DNASeqKidney	0.246	0.087	0.405
eQTLs	Lung	DNASeqLung	0.607	0.525	0.69
eQTLs	Muscle	DNASeqMuscle	1.197	1.132	1.262
eQTLs	Ovary	DNASeqOvary	0.716	0.634	0.798
eQTLs	Prostate	DNASeqProstate	0.445	0.358	0.532
eQTLs	Testis	DNASeqTestis	0.807	0.744	0.869

## Sheet: Chromatin States - Single Tissu
qtl	tissue	feature	logOR	logORcil	logORciu
mQTLs	Colon	TssA	-0.369	-0.501	-0.237
mQTLs	Colon	TssFlnk	-0.42	-0.76	-0.079
mQTLs	Colon	TssFlnkU	0.018	-0.231	0.267
mQTLs	Colon	TssFlnkD	0.147	-0.265	0.56
mQTLs	Colon	Tx	-0.278	-0.416	-0.141
mQTLs	Colon	TxWk	-0.065	-0.15	0.02
mQTLs	Colon	EnhG1	0.151	-0.102	0.404
mQTLs	Colon	EnhG2	-0.081	-0.621	0.458
mQTLs	Colon	EnhA1	0.281	0.093	0.469
mQTLs	Colon	EnhA2	0.252	0.132	0.372
mQTLs	Colon	EnhWk	0.396	0.234	0.558
mQTLs	Colon	ZNF/Rpts	0.02	-0.204	0.245
mQTLs	Lung	TssA	-0.41	-0.54	-0.28
mQTLs	Lung	TssFlnk	-0.105	-0.418	0.207
mQTLs	Lung	TssFlnkU	0.114	-0.162	0.391
mQTLs	Lung	TssFlnkD	-0.147	-0.651	0.357
mQTLs	Lung	Tx	-0.403	-0.542	-0.264
mQTLs	Lung	TxWk	0.014	-0.097	0.124
mQTLs	Lung	EnhG1	0.126	-0.129	0.38
mQTLs	Lung	EnhG2	0.331	-0.078	0.739
mQTLs	Lung	EnhA1	0.601	0.436	0.765
mQTLs	Lung	EnhA2	0.322	0.206	0.439
mQTLs	Lung	EnhWk	0.425	0.267	0.583
mQTLs	Lung	ZNF/Rpts	-0.119	-0.367	0.129
mQTLs	Muscle	TssA	-0.455	-0.697	-0.213
mQTLs	Muscle	TssFlnk	0.075	-1.004	1.155
mQTLs	Muscle	TssFlnkU	-0.197	-0.735	0.342
mQTLs	Muscle	TssFlnkD	0.293	-0.389	0.975
mQTLs	Muscle	Tx	-0.536	-0.778	-0.294
mQTLs	Muscle	TxWk	-0.076	-0.207	0.055
mQTLs	Muscle	EnhG1	-0.088	-0.731	0.556
mQTLs	Muscle	EnhG2	-0.749	-1.672	0.174
mQTLs	Muscle	EnhA1	0.191	-0.134	0.516
mQTLs	Muscle	EnhA2	0.187	-0.025	0.399
mQTLs	Muscle	EnhWk	0.354	0.071	0.636
mQTLs	Muscle	ZNF/Rpts	0.106	-0.335	0.548
mQTLs	Ovary	TssA	-0.779	-0.933	-0.625
mQTLs	Ovary	TssFlnk	-0.141	-0.487	0.204
mQTLs	Ovary	TssFlnkU	-0.082	-0.429	0.265
mQTLs	Ovary	TssFlnkD	-0.055	-0.521	0.412
mQTLs	Ovary	Tx	-0.269	-0.41	-0.129
mQTLs	Ovary	TxWk	0.007	-0.068	0.082
mQTLs	Ovary	EnhG1	-0.079	-0.42	0.262
mQTLs	Ovary	EnhG2	-0.677	-1.323	-0.03
mQTLs	Ovary	EnhA1	0.327	0.137	0.516
mQTLs	Ovary	EnhA2	0.409	0.289	0.529
mQTLs	Ovary	EnhWk	0.214	0.036	0.391
mQTLs	Ovary	ZNF/Rpts	-0.162	-0.428	0.105
mQTLs	WholeBlood	TssA	-0.601	-0.868	-0.333
mQTLs	WholeBlood	TssFlnk	-0.055	-0.625	0.514
mQTLs	WholeBlood	TssFlnkU	0.266	-0.215	0.748
mQTLs	WholeBlood	TssFlnkD	-0.454	-1.521	0.613
mQTLs	WholeBlood	Tx	-0.362	-0.63	-0.095
mQTLs	WholeBlood	TxWk	0.001	-0.121	0.123
mQTLs	WholeBlood	EnhG1	0.521	0.092	0.95
mQTLs	WholeBlood	EnhG2	0.094	-0.758	0.947
mQTLs	WholeBlood	EnhA1	0.416	0.076	0.755
mQTLs	WholeBlood	EnhA2	0.328	0.105	0.55
mQTLs	WholeBlood	EnhWk	0.417	0.118	0.715
mQTLs	WholeBlood	ZNF/Rpts	-0.455	-0.949	0.039
eQTLs	Colon	TssA	1.472	1.367	1.577
eQTLs	Colon	TssFlnk	0.975	0.65	1.3
eQTLs	Colon	TssFlnkU	1.085	0.726	1.443
eQTLs	Colon	TssFlnkD	1.292	0.856	1.728
eQTLs	Colon	Tx	1.304	1.187	1.421
eQTLs	Colon	TxWk	0.629	0.557	0.702
eQTLs	Colon	EnhG1	1.159	0.867	1.452
eQTLs	Colon	EnhG2	1.075	0.466	1.684
eQTLs	Colon	EnhA1	0.712	0.435	0.99
eQTLs	Colon	EnhA2	0.499	0.329	0.67
eQTLs	Colon	EnhWk	0.405	0.138	0.671
eQTLs	Colon	ZNF/Rpts	0.715	0.44	0.99
eQTLs	Lung	TssA	1.447	1.347	1.548
eQTLs	Lung	TssFlnk	1.174	0.884	1.463
eQTLs	Lung	TssFlnkU	1.13	0.821	1.439
eQTLs	Lung	TssFlnkD	1.418	1.035	1.802
eQTLs	Lung	Tx	1.135	1.028	1.243
eQTLs	Lung	TxWk	0.575	0.51	0.64
eQTLs	Lung	EnhG1	1.093	0.828	1.358
eQTLs	Lung	EnhG2	1.17	0.687	1.654
eQTLs	Lung	EnhA1	0.819	0.574	1.063
eQTLs	Lung	EnhA2	0.998	0.873	1.124
eQTLs	Lung	EnhWk	0.443	0.209	0.677
eQTLs	Lung	ZNF/Rpts	0.671	0.432	0.911
eQTLs	Ovary	TssA	1.606	1.499	1.712
eQTLs	Ovary	TssFlnk	1.271	0.941	1.601
eQTLs	Ovary	TssFlnkU	1.175	0.821	1.53
eQTLs	Ovary	TssFlnkD	0.955	0.381	1.529
eQTLs	Ovary	Tx	0.94	0.807	1.073
eQTLs	Ovary	TxWk	0.44	0.359	0.522
eQTLs	Ovary	EnhG1	0.643	0.282	1.003
eQTLs	Ovary	EnhG2	0.739	0.056	1.421
eQTLs	Ovary	EnhA1	0.424	0.068	0.781
eQTLs	Ovary	EnhA2	0.396	0.193	0.6
eQTLs	Ovary	EnhWk	0.128	-0.236	0.493
eQTLs	Ovary	ZNF/Rpts	0.864	0.596	1.132
eQTLs	WholeBlood	TssA	1.707	1.609	1.806
eQTLs	WholeBlood	TssFlnk	0.981	0.637	1.325
eQTLs	WholeBlood	TssFlnkU	0.963	0.603	1.323
eQTLs	WholeBlood	TssFlnkD	1.073	0.565	1.581
eQTLs	WholeBlood	Tx	0.963	0.853	1.073
eQTLs	WholeBlood	TxWk	0.543	0.479	0.607
eQTLs	WholeBlood	EnhG1	1.175	0.935	1.415
eQTLs	WholeBlood	EnhG2	0.935	0.378	1.493
eQTLs	WholeBlood	EnhA1	1.065	0.851	1.28
eQTLs	WholeBlood	EnhA2	1.106	0.984	1.229
eQTLs	WholeBlood	EnhWk	0.633	0.405	0.862
eQTLs	WholeBlood	ZNF/Rpts	0.351	0.051	0.651

## Sheet: Chromatin States - Across Tissu
QTL	ft	estimate	se	zval	pval	ci.lb	ci.ub	I2	QEp	padj	percent_top_QTL_variants
mQTLs	TssA	-0.517853	0.0815626	-6.34915	2.16506e-10	-0.677713	-0.357994	76.9188	0.000818433	5.19613e-09	1.40979
mQTLs	TssFlnk	-0.1919	0.0913648	-2.10037	0.0356964	-0.370972	-0.0128281	0	0.633706	0.856714	0.314382
mQTLs	TssFlnkU	0.0346414	0.0758249	0.456861	0.647771	-0.113973	0.183255	0	0.668879	1	0.348402
mQTLs	TssFlnkD	0.0151196	0.122182	0.123746	0.901516	-0.224352	0.254591	0	0.688553	1	0.188385
mQTLs	Tx	-0.344179	0.0426091	-8.07758	6.6062e-16	-0.427691	-0.260667	19.0733	0.277473	1.58549e-14	5.72947
mQTLs	TxWk	-0.0209476	0.0222981	-0.939436	0.347507	-0.0646511	0.0227559	0	0.600092	1	21.1876
mQTLs	EnhG1	0.131411	0.0740243	1.77524	0.0758579	-0.0136739	0.276496	0.00795455	0.276969	1	1.42431
mQTLs	EnhG2	-0.151122	0.218269	-0.692367	0.488707	-0.578921	0.276677	56.1386	0.0544719	1	0.329564
mQTLs	EnhA1	0.380051	0.0773172	4.91548	8.8565e-07	0.228512	0.53159	56.138	0.0509785	2.12556e-05	1.87654
mQTLs	EnhA2	0.31281	0.0374325	8.35662	6.45383e-17	0.239443	0.386176	22.7508	0.303747	1.54892e-15	4.59129
mQTLs	EnhWk	0.358814	0.0471147	7.61576	2.62151e-14	0.266471	0.451157	9.91144	0.465741	6.29162e-13	2.68782
mQTLs	ZNF/Rpts	-0.0865178	0.0662007	-1.3069	0.191246	-0.216269	0.0432332	0.014361	0.391748	1	1.85017
eQTLs	TssA	1.55835	0.0611557	25.4817	3.14346e-143	1.43849	1.67822	81.6984	0.000766793	7.54431e-142	3.79013
eQTLs	TssFlnk	1.10677	0.0816641	13.5527	7.63885e-42	0.946709	1.26683	0	0.511822	1.83332e-40	0.655843
eQTLs	TssFlnkU	1.09225	0.0875928	12.4697	1.09274e-35	0.920575	1.26393	0	0.858196	2.62258e-34	0.692533
eQTLs	TssFlnkD	1.23851	0.117141	10.5728	3.98554e-26	1.00892	1.4681	0	0.523274	9.56529e-25	0.296276
eQTLs	Tx	1.08658	0.0843968	12.8746	6.25339e-38	0.921163	1.25199	87.6452	3.13344e-05	1.50081e-36	8.32966
eQTLs	TxWk	0.548569	0.0380276	14.4255	3.57452e-47	0.474036	0.623102	77.7558	0.00691807	8.57884e-46	24.9982
eQTLs	EnhG1	1.04424	0.107766	9.68987	3.32958e-22	0.833021	1.25546	54.474	0.0893145	7.99098e-21	1.79233
eQTLs	EnhG2	1.01297	0.145251	6.97392	3.08237e-12	0.72828	1.29765	0	0.76761	7.39768e-11	0.438452
eQTLs	EnhA1	0.780235	0.12791	6.09988	1.06146e-09	0.529536	1.03093	71.6485	0.0162303	2.5475e-08	1.74739
eQTLs	EnhA2	0.756315	0.176757	4.27883	1.8788e-05	0.409876	1.10275	95.3243	2.23623e-12	0.000450912	4.88076
eQTLs	EnhWk	0.436402	0.0907855	4.80696	1.53244e-06	0.258466	0.614338	44.1834	0.13461	3.67786e-05	2.26839
eQTLs	ZNF/Rpts	0.658218	0.101334	6.49551	8.27536e-11	0.459607	0.85683	53.9624	0.091419	1.98609e-09	1.90699
